# Supplementary material for: Mechanistic insight into Cp*Rh(iii)-catalyzed Lossen rearrangement vs C–N reductive elimination for the synthesis of pyridones
Source: Royal Society of Chemistry journal article supplement (doi:10.1039/d2nj02792e), 2022-01-01
Supplement: d2nj02792e1.pdf [file d2nj02792e1.pdf]

## Mechanistic Insight into Cp\*Rh(III)-Catalyzed Lossen Rearrangement *vs*

### C-N reductive Elimination for the Synthesis of Pyridones

Baoping Ling\*, Jianqiao Xu, Yuan-Ye Jiang, Peng Liu, Jin Feng, Siwei Bi\*

*School of Chemistry and Chemical Engineering, Qufu Normal University, Qufu, 273165, PR China*

Email Address of Corresponding Author: xiaoling0523@163.com and siweibi@126.com

### **Supporting Information**

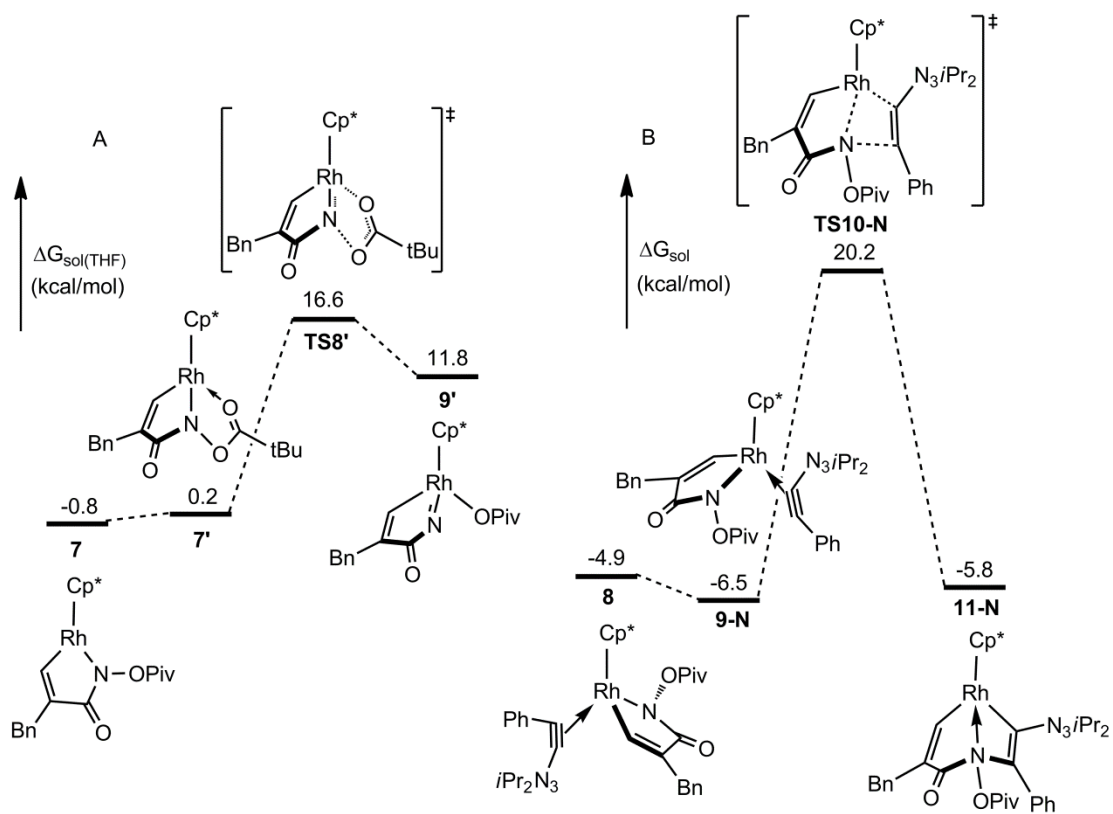

**Figure S1** Gibbs free energy profiles for (A) OPiv migration from N to Rh prior to alkynyl insertion, and (B) insertion of alkynyl triazene into Rh-N bond.

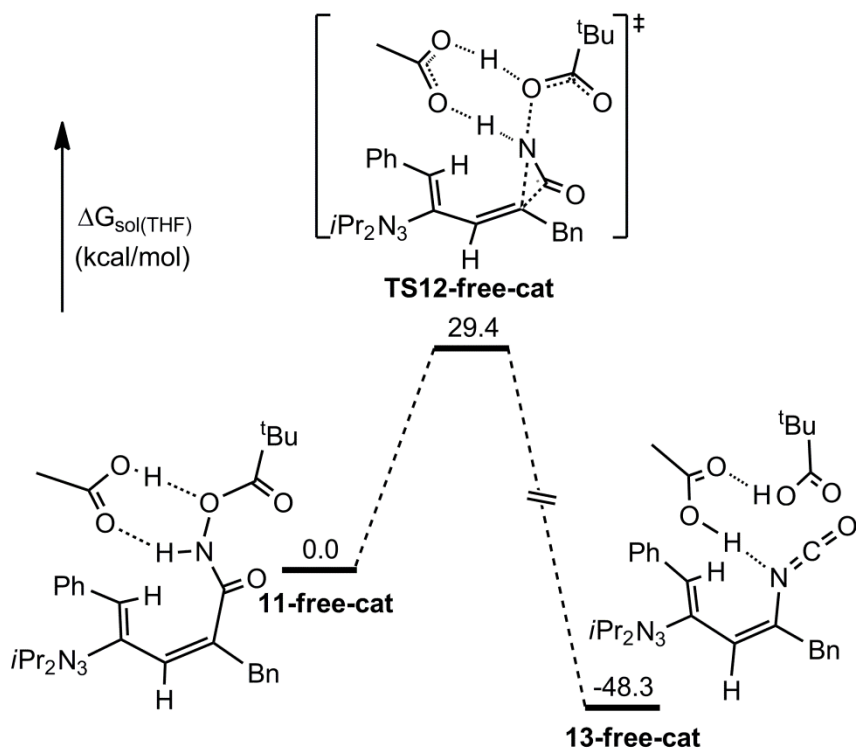

**Figure S2** Gibbs free energy profile for the concerted Lossen rearrangement/OPiv migration without rhodium catalyst.

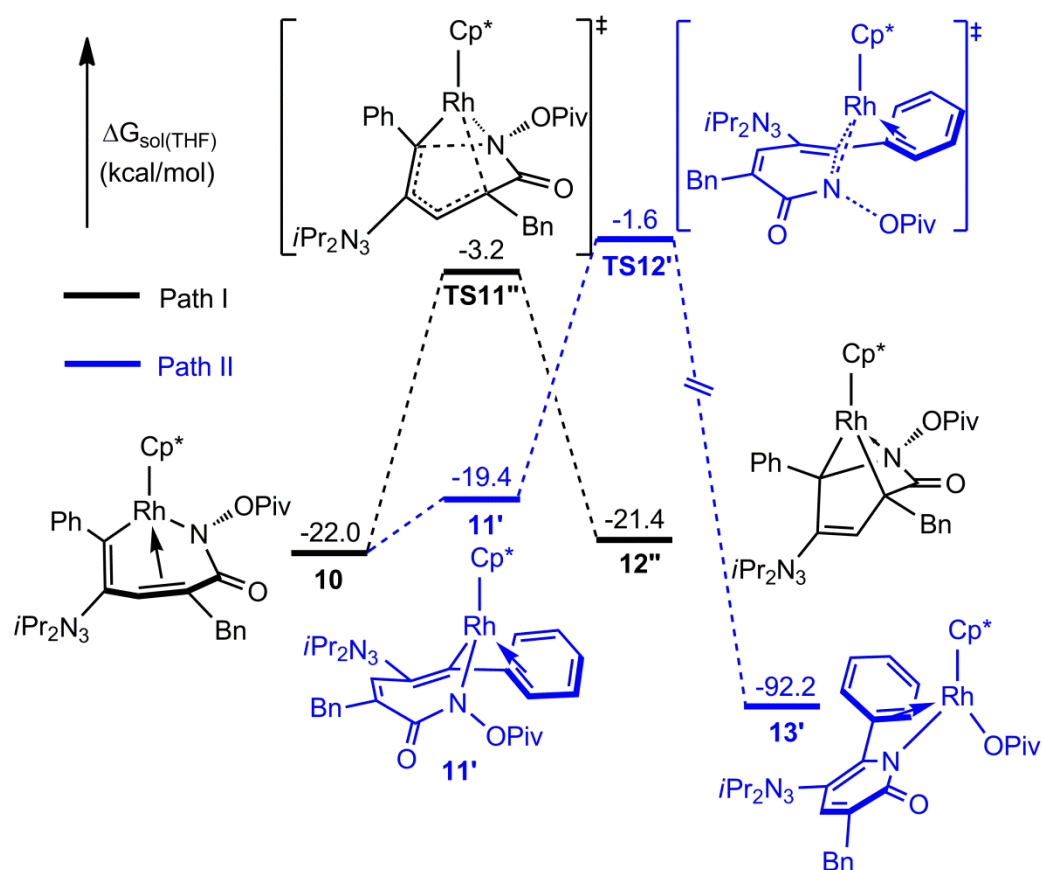

**Figure S3** Gibbs free energy profiles of two pathways for C-N reductive elimination starting from **10**.

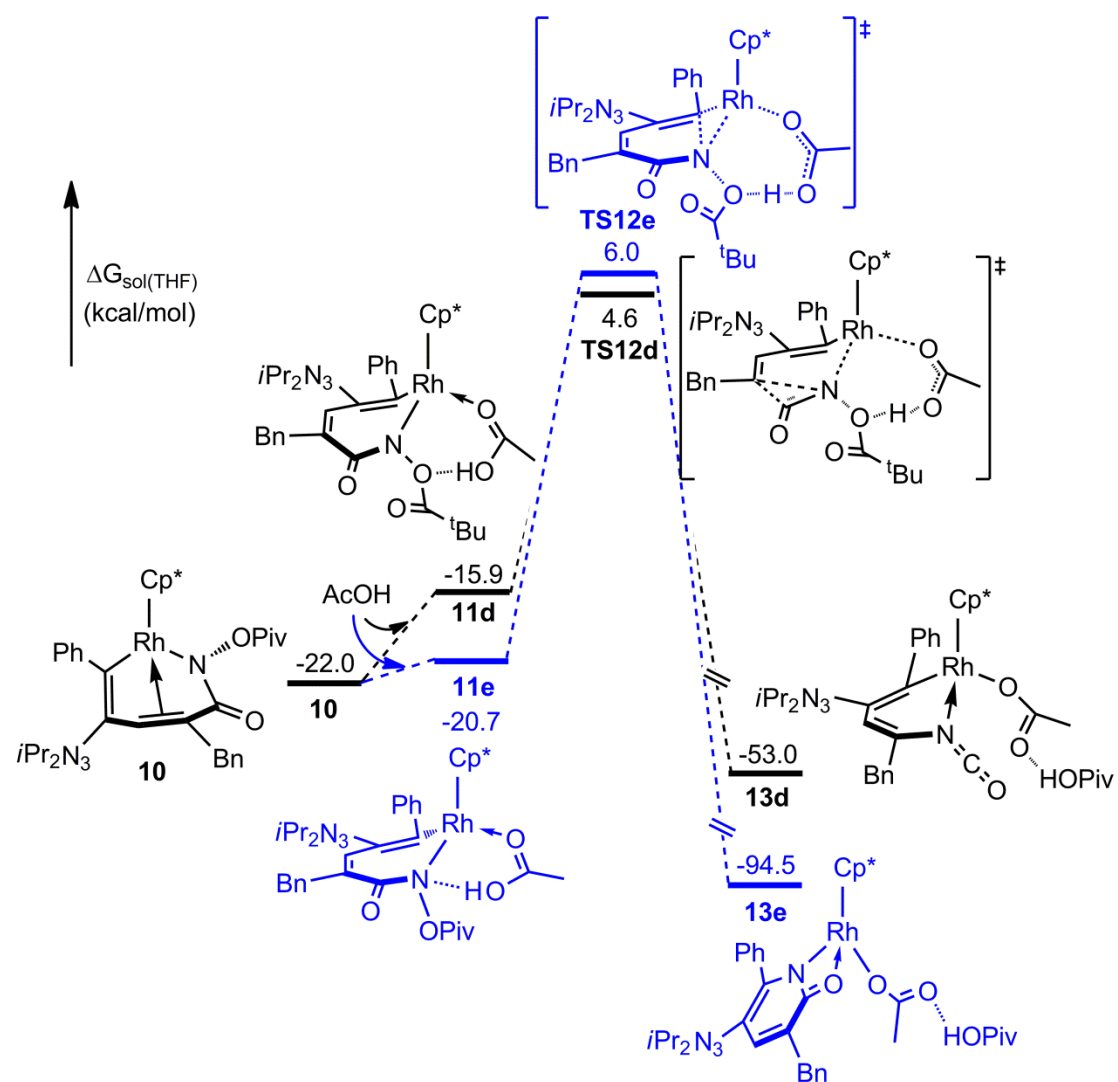

**Figure S4** Gibbs free energy profile for the concerted Lossen rearrangement/N-O bond cleavage and C-N bond formation/N-O bond cleavage assisted by AcOH.

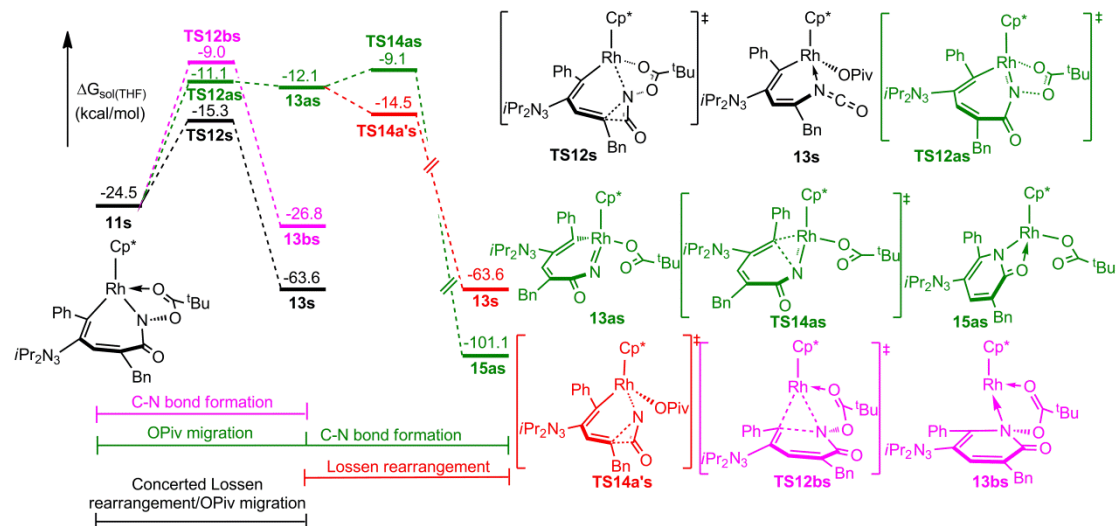

**Figure S5** Gibbs free energy profiles for full optimization in tetrahydrofuran of alternative pathways starting from intermediate **11s**.

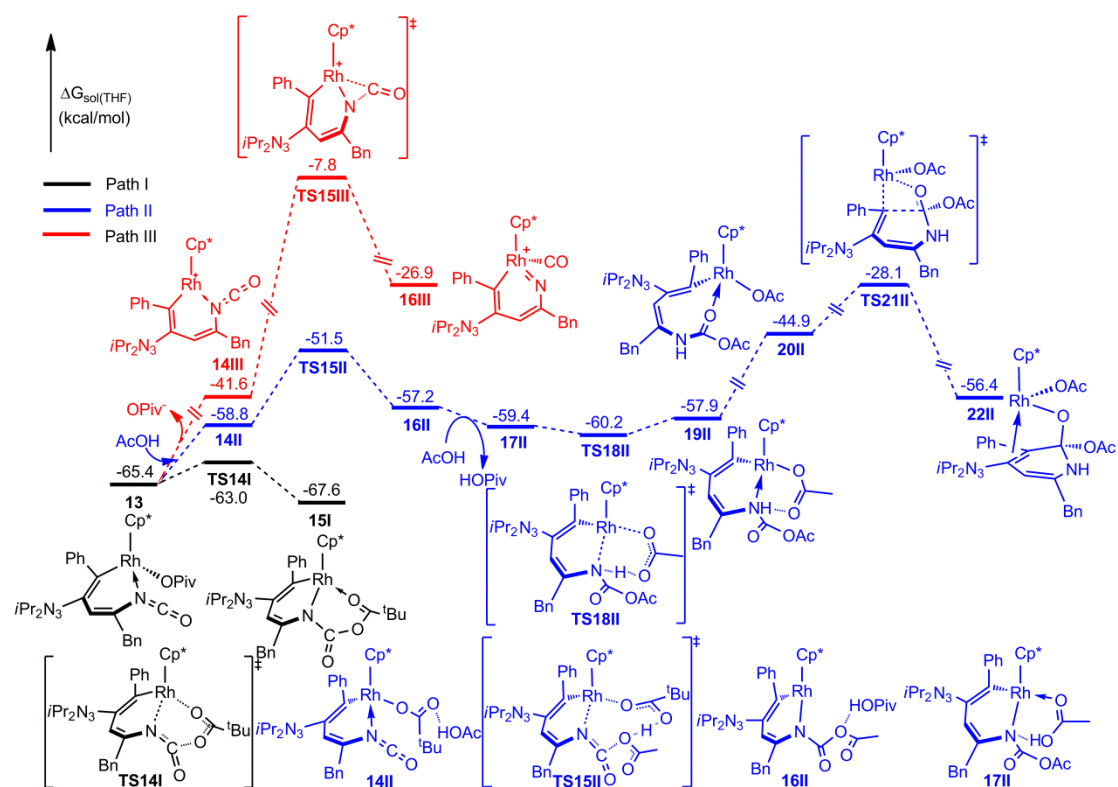

**Figure S6** Gibbs free energy profiles for three pathways starting from isocyanate **13**.

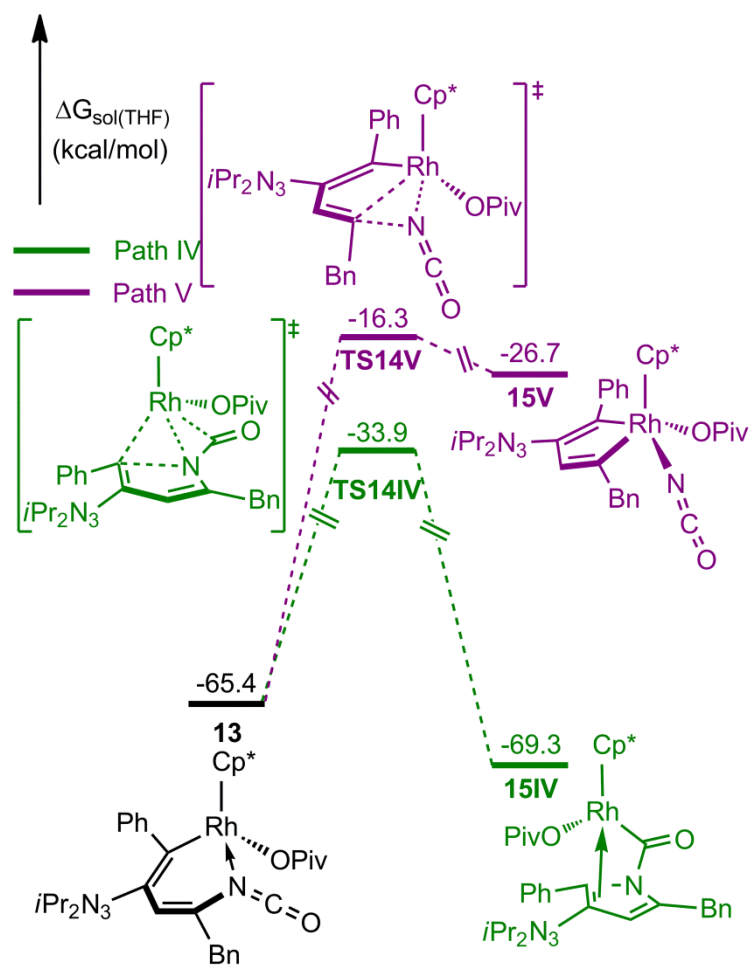

**Figure S7** Gibbs free energy profiles for both pathways starting from isocyanate **13**.

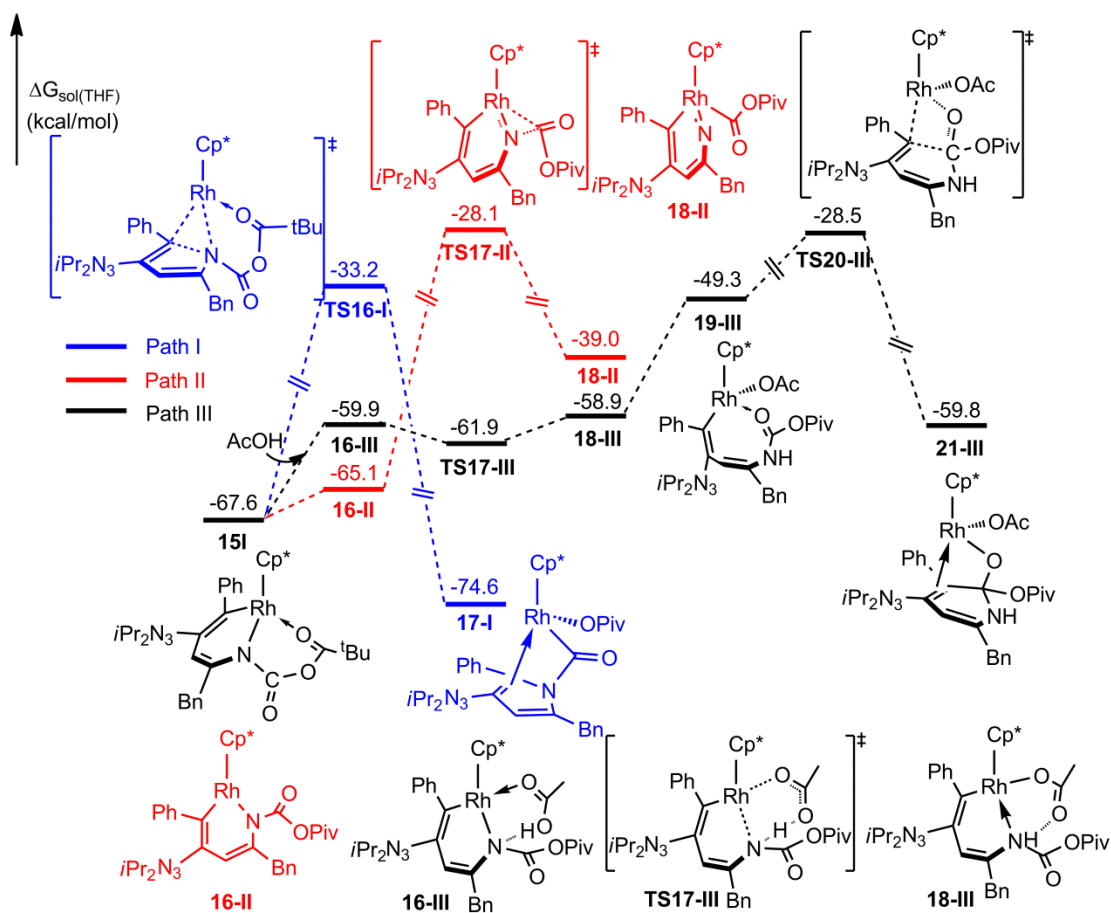

**Figure S8** Gibbs free energy profiles for plausible pathways starting from intermediate **15I**.

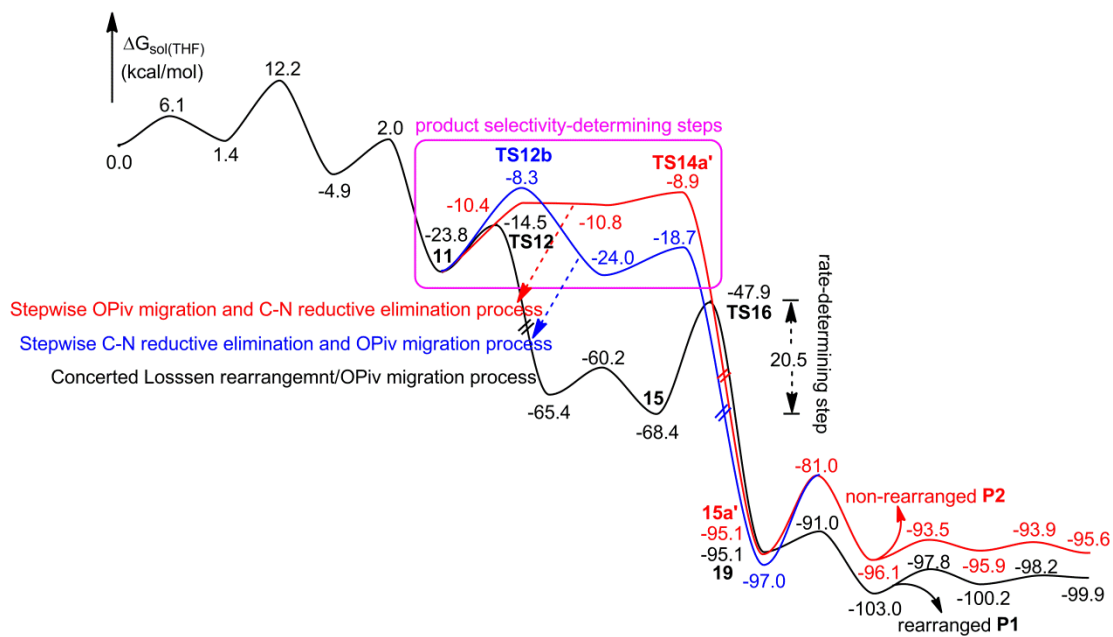

**Figure S9** Summary on the free energy profiles for the formation of rearranged and non-rearranged products.

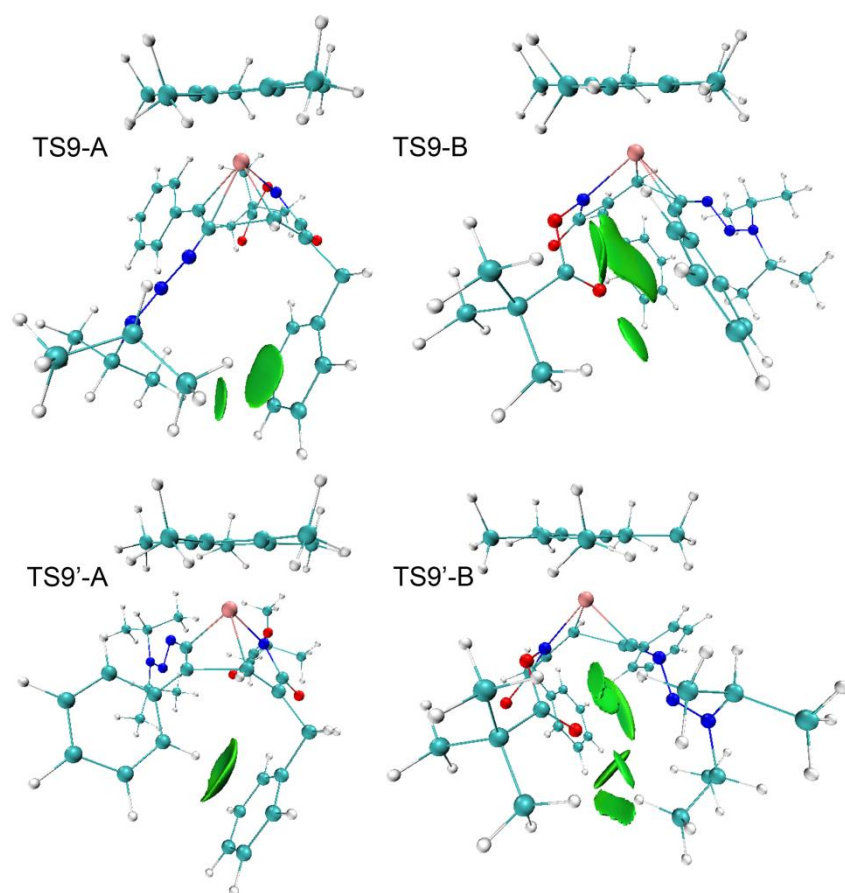

**Figure S10** Intramolecular weak interactions<sup>a</sup> for **TS9** and **TS9'**.

<sup>a</sup> (1) T. Lu, F. Chen, *J. Comput. Chem.*, 2012, **33**, 580-592.

(2) T. Lu, Q. Chen, *J. Comput. Chem.*, 2022, **43**, 539-555.



**Table S1** Electronic energies, solution-phase Gibbs free energies and solution-phase enthalpies for all species as well as imaginary frequencies of transition states.

| <b>Geometry</b>    | <b>E(Hartree)</b> | <b>G<sub>sol</sub>(Hartree)</b> | <b>H<sub>sol</sub>(Hartree)</b> | <b>Frequency(<i>i</i> cm<sup>-1</sup>)</b> |
|--------------------|-------------------|---------------------------------|---------------------------------|--------------------------------------------|
| <b>Cat</b>         | 956.7078877       | -957.122133                     | -957.042455                     |                                            |
| <b>S1</b>          | -863.4735910      | -862.822488                     | -862.752170                     |                                            |
| <b>S2</b>          | -709.1200824      | -708.480708                     | -708.413402                     |                                            |
| <b>1</b>           | -1820.2205088     | -1819.934379                    | -1819.814124                    |                                            |
| <b>TS2</b>         | -1820.2175490     | -1819.934907                    | -1819.815480                    | -1075.16                                   |
| <b>3</b>           | -1820.2253840     | -1819.942420                    | -1819.822961                    |                                            |
| <b>4</b>           | -1591.0826247     | -1590.930838                    | -1590.821877                    |                                            |
| <b>TS5</b>         | -1591.0679124     | -1590.919889                    | -1590.810178                    | -517.04                                    |
| <b>6</b>           | -1591.0946592     | -1590.937878                    | -1590.826766                    |                                            |
| <b>7</b>           | -1361.9688084     | -1361.935305                    | -1361.836789                    |                                            |
| <b>8</b>           | -2071.1318383     | -2070.422529                    | -2070.285024                    |                                            |
| <b>TS9</b>         | -2071.1134905     | -2070.411585                    | -2070.272665                    | -408.82                                    |
| <b>10</b>          | -2071.1558123     | -2070.449815                    | -2070.308207                    |                                            |
| <b>AcOH</b>        | -229.0904107      | -229.005295                     | -228.972584                     |                                            |
| <b>8'</b>          | -2071.1302095     | -2070.420409                    | -2070.283348                    |                                            |
| <b>TS9'</b>        | -2071.1110983     | -2070.403654                    | -2070.265845                    | -352.54                                    |
| <b>10'</b>         | -2071.1611144     | -2070.451299                    | -2070.312076                    |                                            |
| <b>TS8'</b>        | -1361.9475758     | -1361.907520                    | -1361.811076                    | -87.14                                     |
| <b>9'</b>          | -1361.9495987     | -1361.917685                    | -1361.817736                    |                                            |
| <b>9-N</b>         | -2071.1318755     | -2070.425115                    | -2070.286593                    |                                            |
| <b>TS10-N</b>      | -2071.0971092     | -2070.382569                    | -2070.243796                    | -184.47                                    |
| <b>11-N</b>        | -2071.1424274     | -2070.423994                    | -2070.285981                    |                                            |
| <b>11</b>          | -2071.1737832     | -2070.452618                    | -2070.315458                    |                                            |
| <b>TS12</b>        | -2071.1494799     | -2070.437865                    | -2070.297958                    | -260.06                                    |
| <b>13</b>          | -2071.2182452     | -2070.514783                    | -2070.372374                    |                                            |
| <b>TS12a</b>       | -2071.1460006     | -2070.431393                    | -2070.294208                    | -44.06                                     |
| <b>13a</b>         | -2071.1461357     | -2070.431912                    | -2070.292671                    |                                            |
| <b>TS14a</b>       | -2071.1461086     | -2070.430810                    | -2070.294194                    | -58.16                                     |
| <b>11-free-cat</b> | -1801.7827906     | -1800.334620                    | -1800.209641                    |                                            |
| <b>13-free-cat</b> | -1801.8466877     | -1800.411541                    | -1800.283965                    |                                            |
| <b>TS14a'</b>      | -2071.1388822     | -2070.428929                    | -2070.291279                    | -241.18                                    |
| <b>15a'</b>        | -2071.2845001     | -2070.566264                    | -2070.430869                    |                                            |
| <b>TS12c</b>       | -2071.1462948     | -2070.424961                    | -2070.287996                    |                                            |
| <b>13c</b>         | -2071.2989783     | -2070.577428                    | -2070.436600                    |                                            |
| <b>TS12b</b>       | -2071.1741526     | -2070.452910                    | -2070.319175                    | -344.07                                    |
| <b>13b</b>         | -2071.1741526     | -2070.452910                    | -2070.319175                    |                                            |
| <b>TS14b</b>       | -2071.1694657     | -2070.444506                    | -2070.310700                    | -442.33                                    |
| <b>15b</b>         | -2071.2882699     | -2070.569329                    | -2070.433532                    |                                            |
| <b>TS14</b>        | -2071.2162831     | -2070.510686                    | -2070.369065                    | -43.70                                     |

|                      |               |              |              |         |
|----------------------|---------------|--------------|--------------|---------|
| <b>15</b>            | -2071.2355667 | -2070.523718 | -2070.384313 |         |
| <b>TS16</b>          | -2071.2000814 | -2070.491036 | -2070.351683 | -225.16 |
| <b>17</b>            | -2071.2590917 | -2070.547320 | -2070.410947 |         |
| <b>18</b>            | -2071.2799721 | -2070.564006 | -2070.423783 |         |
| <b>19</b>            | -2300.4135256 | -2299.571539 | -2299.418745 |         |
| <b>TS20</b>          | -2300.4037154 | -2299.565112 | -2299.412884 | -160.71 |
| <b>21</b>            | -2300.4217106 | -2299.584182 | -2299.428031 |         |
| <b>P1</b>            | -1225.7042180 | -1224.659501 | -1224.568941 |         |
| <b>22</b>            | -1303.7933823 | -1303.921757 | -1303.823073 |         |
| <b>TS23</b>          | -1303.7914934 | -1303.925544 | -1303.826045 | -630.57 |
| <b>24</b>            | -1303.7926914 | -1303.922314 | -1303.822899 |         |
| <b>HOPiv</b>         | -347.0498177  | -346.802928  | -346.761666  |         |
| <b>TS14I</b>         | -2071.2269091 | -2070.515133 | -2070.375230 | -101.10 |
| <b>15I</b>           | -2071.2372871 | -2070.522409 | -2070.383712 |         |
| <b>TS21II</b>        | -2182.3460856 | -2181.667217 | -2181.529267 | -375.10 |
| <b>22II</b>          | -2182.3788415 | -2181.712343 | -2181.568737 |         |
| <b>TS15III</b>       | -1724.5206445 | -1724.100381 | -1723.979479 | -484.00 |
| <b>16III</b>         | -1724.5522832 | -1724.130799 | -1724.009594 |         |
| <b>TS14IV</b>        | -2071.1838151 | -2070.468837 | -2070.332509 | -248.43 |
| <b>15IV</b>          | -2071.2501092 | -2070.525167 | -2070.392741 |         |
| <b>TS14V</b>         | -2071.1486228 | -2070.440694 | -2070.301410 | -384.19 |
| <b>15V</b>           | -2071.1642632 | -2070.457237 | -2070.318226 |         |
| <b>TS16-I</b>        | -2071.1864906 | -2070.467606 | -2070.331115 | -359.10 |
| <b>17-I</b>          | -2071.2533588 | -2070.533652 | -2070.400678 |         |
| <b>TS17-II</b>       | -2071.1808004 | -2070.459592 | -2070.324891 | -488.62 |
| <b>18-II</b>         | -2071.2001686 | -2070.476877 | -2070.339082 |         |
| <b>TS20-III</b>      | -2300.3102157 | -2299.465525 | -2299.322053 | -378.38 |
| <b>21-III</b>        | -2300.3464920 | -2299.515368 | -2299.366148 |         |
| <b>15b</b>           | -2071.2882699 | -2070.569329 | -2070.433532 |         |
| <b>15a'</b>          | -2071.2845001 | -2070.566264 | -2070.430869 |         |
| <b>16a'</b>          | -2300.4052657 | -2299.560338 | -2299.413302 |         |
| <b>TS17a'</b>        | -2300.3900001 | -2299.549188 | -2299.399630 | -947.48 |
| <b>18a'</b>          | -2300.4126471 | -2299.573139 | -2299.422153 |         |
| <b>19a'</b>          | -1303.7933823 | -1303.921757 | -1303.823073 |         |
| <b>TS20a'</b>        | -1303.7914934 | -1303.925544 | -1303.826045 | -627.69 |
| <b>21a'</b>          | -1303.7926914 | -1303.922314 | -1303.822899 |         |
| <b>P2</b>            | -1225.7022866 | -1224.652586 | -1224.564185 |         |
| <b>7'</b>            | -1361.9684687 | -1361.933062 | -1361.833541 |         |
| <b>TS12-free-cat</b> | -1801.7171244 | -1800.287748 | -1800.158836 | -488.43 |
| <b>11'</b>           | -2071.1574690 | -2070.445590 | -2070.305940 |         |
| <b>TS12'</b>         | -2071.1345868 | -2070.417357 | -2070.280110 | -295.56 |
| <b>12''</b>          | -2071.1619916 | -2070.448843 | -2070.313325 |         |
| <b>TS11''</b>        | -2071.1309839 | -2070.419796 | -2070.281820 | -215.15 |

|                 |               |              |              |         |
|-----------------|---------------|--------------|--------------|---------|
| <b>13'</b>      | -2071.2793643 | -2070.561729 | -2070.425811 |         |
| <b>11d</b>      | -2300.2971736 | -2299.453061 | -2299.304224 |         |
| <b>TS12d</b>    | -2300.2499182 | -2299.410509 | -2299.261924 | -394.17 |
| <b>13d</b>      | -2300.4090886 | -2299.570631 | -2299.419436 |         |
| <b>11e</b>      | -2300.2887607 | -2299.445322 | -2299.295100 |         |
| <b>TS12e</b>    | -2300.2536613 | -2299.412765 | -2299.264236 | -138.94 |
| <b>13e</b>      | -2300.3377882 | -2299.504436 | -2299.352708 |         |
| <b>11s</b>      | -2071.2108933 | -2070.454186 | -2070.318076 |         |
| <b>TS12s</b>    | -2071.1873557 | -2070.439406 | -2070.300122 | -260.06 |
| <b>13s</b>      | -2071.2547286 | -2070.516481 | -2070.375950 |         |
| <b>TS12as</b>   | -2071.1851075 | -2070.432736 | -2070.296129 | -45.50  |
| <b>13as</b>     | -2071.1852354 | -2070.434401 | -2070.294957 |         |
| <b>TS14as</b>   | -2071.1812376 | -2070.429511 | -2070.293555 | -58.16  |
| <b>15as</b>     | -2071.3316710 | -2070.576253 | -2070.440272 |         |
| <b>TS14a's</b>  | -2071.1872476 | -2070.438108 | -2070.299291 | -50.59  |
| <b>13s</b>      | -2071.2543590 | -2070.516727 | -2070.375700 |         |
| <b>TS12bs</b>   | -2071.1861676 | -2070.429406 | -2070.295197 | -344.07 |
| <b>13bs</b>     | -2071.2133096 | -2070.457771 | -2070.324571 |         |
| <b>14III</b>    | -1724.5656598 | -1724.154277 | -1724.034208 |         |
| <b>TS15III</b>  | -1724.5206445 | -1724.100381 | -1723.979479 | -484.00 |
| <b>16III</b>    | -1724.5522832 | -1724.130799 | -1724.009594 |         |
| <b>14II</b>     | -2300.3466686 | -2299.513720 | -2299.360607 |         |
| <b>TS15II</b>   | -2300.3305844 | -2299.502103 | -2299.350813 | -292.13 |
| <b>16II</b>     | -2300.3456743 | -2299.511215 | -2299.361443 |         |
| <b>17II</b>     | -2182.3961731 | -2181.716985 | -2181.575431 |         |
| <b>TS18II</b>   | -2182.3947401 | -2181.718292 | -2181.576696 | -850.48 |
| <b>19II</b>     | -2182.3971932 | -2181.714616 | -2181.573130 |         |
| <b>20II</b>     | -2182.3743792 | -2181.693967 | -2181.553632 |         |
| <b>TS21II</b>   | -2182.3460856 | -2181.667217 | -2181.529267 | -375.10 |
| <b>22II</b>     | -2182.3788415 | -2181.712343 | -2181.568737 |         |
| <b>16-III</b>   | -2300.3598398 | -2299.515544 | -2299.368253 |         |
| <b>TS17-III</b> | -2300.3588769 | -2299.518713 | -2299.371723 | -844.64 |
| <b>18-III</b>   | -2300.3613058 | -2299.513964 | -2299.366209 |         |
| <b>19-III</b>   | -2300.3412125 | -2299.498625 | -2299.352925 |         |
| <b>21-III</b>   | -2300.3464920 | -2299.515368 | -2299.366148 |         |
| <b>16-II</b>    | -2071.2384132 | -2070.518559 | -2070.383498 |         |
| <b>18-II</b>    | -2071.2001686 | -2070.476877 | -2070.339082 |         |

**Cartesian coordinates of all calculated species (in angstrom)**

**Cat**

|    |             |             |             |
|----|-------------|-------------|-------------|
| C  | 1.09204700  | -1.71538400 | -0.21257600 |
| C  | 1.64207000  | -0.76779800 | -1.14258300 |
| C  | 2.19267500  | 0.34542500  | -0.37630300 |
| C  | 1.92477600  | 0.10469900  | 0.99923900  |
| C  | 1.21204000  | -1.16333000 | 1.10675300  |
| O  | -0.58465600 | 2.10019300  | -1.00889900 |
| O  | -1.06485900 | 1.67262300  | 1.08808300  |
| C  | -1.19101000 | 2.41912900  | 0.06392600  |
| C  | -2.08134200 | 3.63138200  | 0.10925400  |
| H  | -3.09348700 | 3.32571700  | -0.17651000 |
| H  | -2.11796700 | 4.03929200  | 1.12109000  |
| H  | -1.73570100 | 4.38477700  | -0.60096500 |
| Rh | 0.03292200  | 0.20595800  | -0.09655600 |
| C  | 2.85409200  | 1.54376100  | -0.98347900 |
| H  | 3.83584900  | 1.27546400  | -1.39091200 |
| H  | 2.24413200  | 1.94714200  | -1.79625200 |
| H  | 2.99368100  | 2.33888400  | -0.24925900 |
| C  | 1.74066200  | -0.92139300 | -2.62811100 |
| H  | 1.65881800  | 0.04707000  | -3.12757100 |
| H  | 2.70446800  | -1.36575100 | -2.90711900 |
| H  | 0.94601100  | -1.56395700 | -3.01214500 |
| C  | 0.47619100  | -3.03618700 | -0.54843900 |
| H  | 0.12927700  | -3.05903900 | -1.58352200 |
| H  | 1.22097100  | -3.83177700 | -0.42170200 |
| H  | -0.37716600 | -3.23224700 | 0.10116000  |
| C  | 0.76276800  | -1.81827000 | 2.37379900  |
| H  | -0.25114200 | -2.20169100 | 2.24615800  |
| H  | 1.43644400  | -2.64376600 | 2.63594600  |
| H  | 0.75895300  | -1.10741900 | 3.20268500  |
| C  | 2.25303900  | 0.98910700  | 2.16233100  |
| H  | 1.36698300  | 1.15201600  | 2.78187600  |
| H  | 3.02557300  | 0.52615900  | 2.78705200  |
| H  | 2.61702700  | 1.96492500  | 1.83622500  |
| O  | -1.84095600 | -0.38081000 | -0.70101600 |
| O  | -2.08904300 | -1.92044500 | 0.94485400  |
| C  | -2.50569800 | -1.27057600 | -0.01696400 |
| C  | -3.93274400 | -1.44466200 | -0.52788200 |
| H  | -4.39997500 | -2.30568400 | -0.04790600 |
| H  | -4.50798700 | -0.54237000 | -0.29645900 |
| H  | -3.93751500 | -1.56376300 | -1.61481500 |

**S1**

|   |             |             |             |
|---|-------------|-------------|-------------|
| C | 0.93031100  | 2.50739200  | 0.96485400  |
| C | 1.51159900  | 1.28523000  | 1.30689500  |
| C | 2.38461100  | 0.64030500  | 0.42243600  |
| C | 2.66299400  | 1.24227100  | -0.81090800 |
| C | 2.08381500  | 2.46352500  | -1.15475500 |
| C | 1.21217900  | 3.09847600  | -0.26768200 |
| H | 0.25464300  | 2.99589700  | 1.66181000  |
| H | 1.26731200  | 0.80998700  | 2.25171300  |
| H | 3.32960800  | 0.74198500  | -1.50978000 |
| H | 2.30708200  | 2.91600500  | -2.11675800 |
| H | 0.75521300  | 4.04639200  | -0.53670500 |
| C | 2.94724900  | -0.73567400 | 0.74672200  |
| H | 4.00095600  | -0.80507700 | 0.45744900  |
| H | 2.87983100  | -0.91609000 | 1.82474600  |
| C | 2.16067600  | -1.81556100 | 0.03160200  |
| C | 2.67231200  | -2.69006400 | -0.84132600 |
| H | 2.05745800  | -3.44860400 | -1.31565400 |
| H | 3.73103600  | -2.68639800 | -1.08519300 |
| C | 0.70290700  | -1.80437300 | 0.38488900  |
| N | -0.14091500 | -2.01689000 | -0.71469600 |
| H | 0.17947400  | -1.55742600 | -1.56543500 |
| O | 0.29130200  | -1.60973100 | 1.51402400  |
| C | -1.68559400 | -0.28397000 | -0.67250400 |
| C | -2.95031200 | 0.19731100  | 0.02324800  |
| C | -4.08503200 | -0.83896000 | -0.08319100 |
| H | -4.97145600 | -0.45721000 | 0.43347100  |
| H | -4.35638300 | -1.02494800 | -1.12754500 |
| H | -3.80266300 | -1.78993900 | 0.37294200  |
| C | -3.37231000 | 1.53742700  | -0.59745200 |
| H | -4.22786000 | 1.94410400  | -0.04917000 |
| H | -2.55233300 | 2.25814700  | -0.55950400 |
| H | -3.66321100 | 1.41392700  | -1.64538600 |
| C | -2.54364600 | 0.39423900  | 1.50658200  |
| H | -3.41550200 | 0.72594800  | 2.08008400  |
| H | -2.15951100 | -0.53502100 | 1.93365600  |
| H | -1.75911500 | 1.15239100  | 1.59245300  |
| O | -0.90341100 | 0.38666000  | -1.30239900 |
| O | -1.47023100 | -1.63334000 | -0.44297200 |

**I**

|   |            |             |             |
|---|------------|-------------|-------------|
| C | 3.29302600 | 1.05011300  | -0.91673000 |
| C | 3.84512000 | -0.09875100 | -0.23122900 |
| C | 3.34848900 | -1.28966400 | -0.89797000 |
| C | 2.43886400 | -0.88413400 | -1.91319600 |

|    |             |             |             |            |             |             |             |
|----|-------------|-------------|-------------|------------|-------------|-------------|-------------|
| C  | 2.36489700  | 0.57697700  | -1.89481000 | C          | -1.14292300 | -2.66708200 | -0.62278500 |
| O  | 1.66430500  | -1.50639900 | 1.68825500  | C          | -0.17594700 | -3.39281900 | -0.05824300 |
| O  | -0.49739000 | -1.20101600 | 2.28090300  | H          | 0.81157400  | -2.99813500 | 0.14219100  |
| C  | 0.66155600  | -1.58817600 | 2.50533600  | H          | -0.37362200 | -4.41605900 | 0.25028200  |
| C  | 0.99994400  | -2.22852300 | 3.84111000  | C          | -0.96479600 | -1.26826000 | -1.13254600 |
| H  | 1.48346800  | -1.47412500 | 4.47098900  | N          | -0.50481200 | -0.27271600 | -0.20732500 |
| H  | 0.09078800  | -2.57295600 | 4.33599000  | H          | -0.74536400 | -0.45438500 | 0.81825700  |
| H  | 1.70411600  | -3.05351400 | 3.70836900  | O          | -1.25616300 | -0.97284300 | -2.27459400 |
| Rh | 1.72772600  | -0.15456900 | 0.07146100  | C          | -1.76666100 | 1.67818100  | 0.16521400  |
| C  | 3.70589200  | -2.68611300 | -0.49640500 | C          | -2.39944400 | 2.88755900  | -0.51809000 |
| C  | 4.85143900  | -0.08841800 | 0.87595100  | C          | -1.65190200 | 3.32151400  | -1.78826700 |
| H  | 5.87093100  | -0.17471400 | 0.47944400  | H          | -2.16587900 | 4.18223500  | -2.22962800 |
| H  | 4.78698300  | 0.83498700  | 1.45466900  | H          | -0.62885400 | 3.60949000  | -1.54058400 |
| H  | 4.67484600  | -0.92360500 | 1.55801900  | H          | -1.62479600 | 2.51969800  | -2.53019200 |
| C  | 3.64308400  | 2.47336400  | -0.62888300 | C          | -2.42551100 | 4.03860500  | 0.50312700  |
| C  | 1.49402500  | 1.42749000  | -2.76474500 | H          | -2.96767500 | 4.89211900  | 0.08305700  |
| H  | 1.17908600  | 2.30814000  | -2.20386900 | H          | -2.91990200 | 3.72769400  | 1.42664500  |
| H  | 2.02537100  | 1.74080800  | -3.67163800 | H          | -1.40357300 | 4.34804700  | 0.73760700  |
| H  | 0.59013000  | 0.88747700  | -3.05404000 | C          | -3.83800400 | 2.43524600  | -0.86859900 |
| C  | 1.75998800  | -1.78150500 | -2.89998600 | H          | -4.37643000 | 3.26523200  | -1.33809300 |
| H  | 0.84899700  | -1.33212800 | -3.29405000 | H          | -3.82708700 | 1.59071300  | -1.56531700 |
| H  | 2.43675600  | -1.97577400 | -3.74101000 | H          | -4.37994100 | 2.12389100  | 0.02792300  |
| H  | 1.48868500  | -2.74041500 | -2.45263500 | O          | -1.98729400 | 1.30879500  | 1.29360600  |
| O  | 1.32308800  | 1.18128500  | 1.59811700  | O          | -0.95949200 | 0.98749500  | -0.70031000 |
| O  | 0.82680800  | 2.99833900  | 0.33718000  | H          | 3.16879500  | -3.42662500 | -1.09153400 |
| C  | 0.92966600  | 2.40800400  | 1.41949000  | H          | 4.78080500  | -2.85537200 | -0.62424900 |
| C  | 0.52061800  | 3.07825500  | 2.72409300  | H          | 3.45678800  | -2.84231500 | 0.55831200  |
| H  | 0.53924600  | 4.16386400  | 2.61190600  | H          | 3.84623000  | 2.61891700  | 0.43386800  |
| H  | -0.50167200 | 2.75590400  | 2.94613400  | H          | 4.54979200  | 2.73710000  | -1.18861800 |
| H  | 1.16236100  | 2.76307500  | 3.54957400  | H          | 2.83218400  | 3.14472000  | -0.90164900 |
| C  | -5.69525200 | -1.02459800 | -0.61698500 | <b>TS2</b> |             |             |             |
| C  | -4.72126200 | -1.89028800 | -1.11682100 | C          | 3.40808600  | 0.90944500  | -0.86562900 |
| C  | -3.61466100 | -2.24772400 | -0.33657500 | C          | 3.87547800  | -0.30347500 | -0.25106400 |
| C  | -3.49117200 | -1.70917300 | 0.95184200  | C          | 3.25194700  | -1.41968500 | -0.94509500 |
| C  | -4.45673600 | -0.83123000 | 1.44638800  | C          | 2.37409000  | -0.89701600 | -1.93450400 |
| C  | -5.56465900 | -0.49222300 | 0.66790000  | C          | 2.41597400  | 0.55958200  | -1.84667300 |
| H  | -6.54780300 | -0.75662800 | -1.23499900 | O          | 1.59458600  | -1.47277000 | 1.79417000  |
| H  | -4.81525000 | -2.28593000 | -2.12515100 | O          | -0.56635300 | -0.99806500 | 2.24336000  |
| H  | -2.62390700 | -1.94342500 | 1.56206500  | C          | 0.57513300  | -1.45836100 | 2.55242700  |
| H  | -4.32593500 | -0.39918300 | 2.43327200  | C          | 0.73520300  | -2.02717900 | 3.94284100  |
| H  | -6.31511000 | 0.19226300  | 1.05346700  | H          | 0.97366900  | -1.19936500 | 4.61941600  |
| C  | -2.54546600 | -3.17817700 | -0.89198000 | H          | -0.19919200 | -2.48163500 | 4.27684500  |
| H  | -2.64209700 | -4.18255100 | -0.46270000 | H          | 1.55382600  | -2.74767400 | 3.97370100  |
| H  | -2.68119900 | -3.26987300 | -1.97544700 | Rh         | 1.74185400  | -0.18305200 | 0.07868800  |

|   |             |             |             |          |             |             |             |
|---|-------------|-------------|-------------|----------|-------------|-------------|-------------|
| C | 3.51168200  | -2.85773500 | -0.62032600 | C        | -2.32446200 | 2.88654200  | -0.58831000 |
| C | 4.89440500  | -0.43437800 | 0.83726700  | C        | -1.48846500 | 3.34635700  | -1.79236900 |
| H | 5.88318000  | -0.66317000 | 0.42050000  | H        | -1.99057400 | 4.19187200  | -2.27551700 |
| H | 4.97408100  | 0.48746500  | 1.41612400  | H        | -0.49665800 | 3.66253900  | -1.46476900 |
| H | 4.61871200  | -1.23850700 | 1.52423500  | H        | -1.37956000 | 2.54574800  | -2.52753400 |
| C | 3.86403100  | 2.28987400  | -0.52106000 | C        | -2.49372800 | 4.03977300  | 0.41504300  |
| C | 1.62875800  | 1.51646200  | -2.68358800 | H        | -3.03315000 | 4.86737100  | -0.05713100 |
| H | 1.39003000  | 2.40135800  | -2.09318900 | H        | -3.05165800 | 3.71050100  | 1.29481900  |
| H | 2.19075700  | 1.81025300  | -3.57876700 | H        | -1.51349000 | 4.40204700  | 0.73868200  |
| H | 0.68284100  | 1.06802200  | -2.99280500 | C        | -3.70248800 | 2.36492900  | -1.06513200 |
| C | 1.59623400  | -1.68781900 | -2.93781400 | H        | -4.23123800 | 3.16148200  | -1.59964700 |
| H | 0.69462100  | -1.16346000 | -3.25446500 | H        | -3.58165500 | 1.51180000  | -1.74063700 |
| H | 2.22023200  | -1.86448400 | -3.82242300 | H        | -4.31332700 | 2.03959400  | -0.21917900 |
| H | 1.28913200  | -2.65638000 | -2.53723900 | O        | -2.00537700 | 1.35652800  | 1.27718300  |
| O | 1.34234600  | 1.19525500  | 1.56783500  | O        | -0.83677500 | 1.02039900  | -0.63912900 |
| O | 1.01453600  | 3.05488800  | 0.31215400  | H        | 2.83998000  | -3.52241300 | -1.16567900 |
| C | 1.01438900  | 2.44244100  | 1.38448500  | H        | 4.54278400  | -3.12463600 | -0.87956300 |
| C | 0.54786900  | 3.10638600  | 2.67371100  | H        | 3.37620000  | -3.03411500 | 0.45124400  |
| H | 0.56397000  | 4.19211200  | 2.56418600  | H        | 4.14555800  | 2.35858800  | 0.53181200  |
| H | -0.47820600 | 2.77365900  | 2.85933200  | H        | 4.74499300  | 2.53737200  | -1.12704000 |
| H | 1.16308000  | 2.79559200  | 3.52139900  | H        | 3.07534800  | 3.01765500  | -0.69972900 |
| C | -5.72238500 | -1.00693300 | -0.67572500 | <b>3</b> |             |             |             |
| C | -4.73432200 | -1.87788300 | -1.13686100 | C        | 3.59367300  | -0.54690400 | 0.45255300  |
| C | -3.64466700 | -2.21727300 | -0.32602800 | C        | 3.20981100  | -1.91816900 | 0.48190500  |
| C | -3.55512400 | -1.65549300 | 0.95441400  | C        | 2.67051300  | -2.26337200 | -0.82884400 |
| C | -4.53263400 | -0.77073800 | 1.41114600  | C        | 2.67766200  | -1.09153300 | -1.63417800 |
| C | -5.62295700 | -0.44912500 | 0.60108300  | C        | 3.19494200  | 0.00363400  | -0.82743100 |
| H | -6.56055800 | -0.75267600 | -1.31871900 | O        | -0.05769700 | -2.03267500 | 1.04130900  |
| H | -4.80153300 | -2.28898800 | -2.14098600 | O        | -1.73832500 | -0.57144000 | 1.52127100  |
| H | -2.70199400 | -1.87815900 | 1.58730500  | C        | -1.15675000 | -1.73559000 | 1.54286000  |
| H | -4.42539900 | -0.31880500 | 2.39202500  | C        | -1.97456900 | -2.78171300 | 2.24804500  |
| H | -6.38323900 | 0.24109300  | 0.95599100  | H        | -2.17515100 | -2.45306400 | 3.27169800  |
| C | -2.55751900 | -3.14839300 | -0.84228800 | H        | -2.93819800 | -2.86872800 | 1.73909800  |
| H | -2.65410100 | -4.14485600 | -0.39434800 | H        | -1.44945000 | -3.73600100 | 2.25120700  |
| H | -2.67698500 | -3.26282000 | -1.92519500 | Rh       | 1.41104300  | -0.69863400 | 0.13783500  |
| C | -1.15890300 | -2.62459000 | -0.57123600 | C        | 2.25543900  | -3.65209700 | -1.20504000 |
| C | -0.18740000 | -3.36262300 | -0.02841100 | C        | 3.37580500  | -2.89059700 | 1.60795500  |
| H | 0.80400200  | -2.97371500 | 0.15808300  | H        | 4.22822800  | -3.55628800 | 1.42452600  |
| H | -0.37836500 | -4.39155300 | 0.26591200  | H        | 3.54482100  | -2.37581100 | 2.55534900  |
| C | -0.99821000 | -1.20928600 | -1.05557000 | H        | 2.48035000  | -3.50895100 | 1.71579800  |
| N | -0.46283200 | -0.27217200 | -0.14018400 | C        | 4.25364800  | 0.20664700  | 1.56178400  |
| H | -0.62136000 | -0.53152800 | 1.09874100  | C        | 3.44353700  | 1.39861900  | -1.30342400 |
| O | -1.41332700 | -0.89778900 | -2.16129300 | H        | 3.35802600  | 2.09543200  | -0.47069700 |
| C | -1.70926000 | 1.70249300  | 0.15698000  | H        | 4.44144300  | 1.47685100  | -1.75360800 |

|   |             |             |             |             |             |             |             |
|---|-------------|-------------|-------------|-------------|-------------|-------------|-------------|
| H | 2.70002800  | 1.69029500  | -2.04633600 | C           | -1.59261100 | 4.27018800  | -1.43073000 |
| C | 2.21262300  | -0.95239800 | -3.05018000 | H           | -1.53476400 | 5.32086600  | -1.73475500 |
| H | 1.60819200  | -0.04983900 | -3.16609700 | H           | -1.60612500 | 3.63482700  | -2.32048700 |
| H | 3.07451500  | -0.87731500 | -3.72342000 | H           | -2.53095400 | 4.11489400  | -0.88998000 |
| H | 1.60333700  | -1.80151100 | -3.36363000 | O           | -1.30897500 | 1.99097800  | 0.60794800  |
| O | 0.91126900  | 0.37879400  | 1.83966600  | O           | 0.21018500  | 1.66402700  | -1.03766800 |
| O | 1.93332100  | 2.34969900  | 1.38986900  | H           | 1.85388300  | -3.70126800 | -2.21802100 |
| C | 1.22009800  | 1.61946600  | 2.08578800  | H           | 3.12094000  | -4.32278300 | -1.15132700 |
| C | 0.54587500  | 2.14346900  | 3.34571800  | H           | 1.49685700  | -4.03190700 | -0.51358200 |
| H | 1.06149600  | 3.03563800  | 3.70475600  | H           | 3.96833900  | -0.19821900 | 2.53496600  |
| H | -0.48234900 | 2.40476900  | 3.07660500  | H           | 5.34282500  | 0.12045500  | 1.46153400  |
| H | 0.51004400  | 1.37737500  | 4.12350300  | H           | 3.97063700  | 1.25797500  | 1.53866500  |
| C | -4.86988700 | 0.50811000  | 0.78944500  | <b>HOAc</b> |             |             |             |
| C | -4.15769800 | 0.23899500  | -0.37859100 | C           | -0.09336300 | 0.12605600  | -0.00007000 |
| C | -4.07137900 | -1.07022300 | -0.87401100 | O           | -0.64469300 | 1.20359800  | -0.00017600 |
| C | -4.72752700 | -2.09521900 | -0.18063400 | O           | -0.77663000 | -1.04713300 | 0.00016000  |
| C | -5.45103300 | -1.82500700 | 0.98423500  | H           | -1.71948900 | -0.81158300 | 0.00022000  |
| C | -5.51917400 | -0.52034700 | 1.47595900  | C           | 1.39603000  | -0.10981800 | 0.00000800  |
| H | -4.90949600 | 1.52578600  | 1.16713000  | H           | 1.67961400  | -0.69166000 | 0.88202200  |
| H | -3.64211200 | 1.03789100  | -0.90011000 | H           | 1.67950200  | -0.69367900 | -0.88069200 |
| H | -4.67625700 | -3.11383400 | -0.55984700 | H           | 1.91495900  | 0.84777100  | -0.00105400 |
| H | -5.96144400 | -2.63232700 | 1.50338600  | <b>4</b>    |             |             |             |
| H | -6.07582900 | -0.30701300 | 2.38427500  | C           | 1.60815800  | -2.80491000 | 0.14497300  |
| C | -3.25920000 | -1.38509400 | -2.12036600 | C           | 0.24501400  | -3.17754500 | 0.30188900  |
| H | -3.53469000 | -2.37597600 | -2.49515100 | C           | -0.43418700 | -2.87396900 | -0.94767900 |
| H | -3.48415200 | -0.65108000 | -2.89949600 | C           | 0.50426000  | -2.28013000 | -1.84683100 |
| C | -1.76008500 | -1.34989600 | -1.87253000 | C           | 1.77067500  | -2.18852200 | -1.15786200 |
| C | -1.01921500 | -2.45990500 | -1.83366100 | Rh          | 0.38122200  | -0.94156500 | -0.05312400 |
| H | 0.04361900  | -2.42008600 | -1.65918700 | C           | -1.82874600 | -3.29635200 | -1.28372600 |
| H | -1.46542300 | -3.44296200 | -1.96006300 | C           | -0.35125500 | -3.81625800 | 1.52026600  |
| C | -1.19359400 | 0.04692000  | -1.78145900 | H           | -0.09688100 | -4.88183300 | 1.57573100  |
| N | -0.13113600 | 0.27167000  | -0.95025400 | H           | 0.01529200  | -3.31197600 | 2.41770100  |
| H | -1.25142500 | 0.16510200  | 1.06444700  | H           | -1.44081700 | -3.73390400 | 1.51608500  |
| O | -1.75879300 | 0.94673500  | -2.41985400 | C           | 2.69738300  | -2.97821500 | 1.15300700  |
| C | -0.53872000 | 2.43942000  | -0.22624900 | C           | 3.04579300  | -1.65080500 | -1.72989300 |
| C | -0.38092200 | 3.92470500  | -0.52906800 | H           | 3.66248400  | -1.20409600 | -0.94727000 |
| C | 0.93401900  | 4.23530500  | -1.26182900 | H           | 3.62656200  | -2.44516900 | -2.21508600 |
| H | 0.99645100  | 5.31275300  | -1.44868800 | H           | 2.83860500  | -0.87404900 | -2.46917700 |
| H | 1.78784000  | 3.93459700  | -0.65127100 | C           | 0.24649100  | -1.79356300 | -3.23956400 |
| H | 0.98684500  | 3.71701800  | -2.22227400 | H           | 0.58899600  | -0.76043200 | -3.35017100 |
| C | -0.44648600 | 4.70670900  | 0.79367100  | H           | 0.77394900  | -2.41487800 | -3.97226700 |
| H | -0.44491100 | 5.78220700  | 0.58758600  | H           | -0.81830500 | -1.81537800 | -3.47962700 |
| H | -1.35548600 | 4.45802700  | 1.34678300  | O           | 0.90153800  | -1.06592800 | 3.05913500  |
| H | 0.41986100  | 4.46533900  | 1.41541400  | O           | 1.72332600  | -0.01302200 | 1.23375200  |

|   |             |             |             |            |             |             |             |
|---|-------------|-------------|-------------|------------|-------------|-------------|-------------|
| C | 1.64638200  | -0.24771100 | 2.51865600  | H          | -2.48133100 | -3.27552100 | -0.40826200 |
| C | 2.58598600  | 0.64492700  | 3.31952800  | H          | 2.29289900  | -3.02680800 | 2.16364600  |
| H | 3.60825400  | 0.56525400  | 2.93754000  | H          | 3.25217300  | -3.90046200 | 0.94067700  |
| H | 2.26890100  | 1.68453000  | 3.19081300  | H          | 3.39698600  | -2.14099200 | 1.11040400  |
| H | 2.55820200  | 0.37198400  | 4.37504100  | <b>TS5</b> |             |             |             |
| C | -6.30945600 | 0.60131000  | 0.98312400  | C          | 2.21995400  | -2.62501400 | 0.84824500  |
| C | -5.17777600 | -0.07089100 | 0.51637300  | C          | 1.27796000  | -3.19546200 | -0.05045400 |
| C | -4.17032600 | 0.61607300  | -0.17116500 | C          | 1.39898400  | -2.51400300 | -1.32637900 |
| C | -4.30615100 | 1.99590000  | -0.37921900 | C          | 2.51285300  | -1.59270600 | -1.22642700 |
| C | -5.43615100 | 2.66612500  | 0.08932700  | C          | 2.99396300  | -1.62814100 | 0.11469300  |
| C | -6.44168000 | 1.97358900  | 0.76913600  | Rh         | 0.86497200  | -1.00299500 | 0.14641400  |
| H | -7.08307500 | 0.05283300  | 1.51341400  | C          | 0.63544500  | -2.82267700 | -2.57823100 |
| H | -5.08038800 | -1.14110500 | 0.68584900  | C          | 0.29932500  | -4.28675500 | 0.25029900  |
| H | -3.51184900 | 2.53570800  | -0.88619300 | H          | 0.69286300  | -5.25231000 | -0.08985900 |
| H | -5.52909800 | 3.73613200  | -0.07448300 | H          | 0.09678800  | -4.36193300 | 1.32064200  |
| H | -7.31911700 | 2.50077500  | 1.13294800  | H          | -0.65092200 | -4.11631100 | -0.26146400 |
| C | -2.95177900 | -0.14442500 | -0.68248100 | C          | 2.45394500  | -2.97075200 | 2.28720500  |
| H | -3.05750100 | -1.18927900 | -0.38804900 | C          | 4.08093100  | -0.80262300 | 0.72963100  |
| H | -2.91645700 | -0.11096300 | -1.77756400 | H          | 3.69745900  | -0.27506100 | 1.60877800  |
| C | -1.65578900 | 0.39538100  | -0.11767400 | H          | 4.91741000  | -1.43663600 | 1.04621400  |
| C | -1.25571800 | 0.17128900  | 1.18369500  | H          | 4.46237500  | -0.05462200 | 0.03285100  |
| H | -0.54080700 | 0.83701200  | 1.64956100  | C          | 2.99386700  | -0.71731000 | -2.34319800 |
| H | -1.83583300 | -0.47510700 | 1.83586000  | H          | 3.69232500  | 0.04118800  | -1.98675700 |
| C | -0.85412600 | 1.42351000  | -0.91381300 | H          | 3.50170000  | -1.32046600 | -3.10501100 |
| N | 0.36039400  | 0.83658200  | -1.08626800 | H          | 2.15638000  | -0.19835500 | -2.81561600 |
| O | -1.28451700 | 2.49547100  | -1.31218000 | O          | -0.99018900 | 0.25750300  | 2.39718600  |
| C | 1.75137900  | 2.49543700  | -0.18052600 | O          | 1.17210700  | 0.31212300  | 1.78046800  |
| C | 3.14871200  | 3.09937200  | -0.32706600 | C          | 0.18665300  | 0.68806200  | 2.50528400  |
| C | 4.17247200  | 1.94193300  | -0.34825200 | C          | 0.47506400  | 1.76143200  | 3.53031100  |
| H | 5.18972500  | 2.34778400  | -0.34145000 | H          | 1.51750700  | 1.72351000  | 3.85154200  |
| H | 4.04087200  | 1.29614800  | 0.52461100  | H          | 0.28989800  | 2.71847100  | 3.03259700  |
| H | 4.04692800  | 1.32805300  | -1.24311000 | H          | -0.20121000 | 1.66964300  | 4.38140200  |
| C | 3.40922600  | 4.01706100  | 0.87623700  | C          | -6.30474400 | -0.75797700 | 0.67380500  |
| H | 4.39602800  | 4.48158900  | 0.77970200  | C          | -5.22714200 | -1.22993500 | -0.07941900 |
| H | 2.65512800  | 4.80560200  | 0.94066100  | C          | -4.34847500 | -0.33689800 | -0.70159100 |
| H | 3.38092400  | 3.45317800  | 1.81240300  | C          | -4.55583500 | 1.04203400  | -0.55325300 |
| C | 3.22430700  | 3.90311900  | -1.64252200 | C          | -5.63072800 | 1.51141300  | 0.20066500  |
| H | 4.22476500  | 4.33525900  | -1.75269300 | C          | -6.50905800 | 0.61489900  | 0.81575400  |
| H | 3.02343400  | 3.26513000  | -2.50654200 | H          | -6.98229000 | -1.46316900 | 1.14765800  |
| H | 2.49702200  | 4.72128000  | -1.64527500 | H          | -5.07198700 | -2.30097800 | -0.18838200 |
| O | 0.97433300  | 2.70115100  | 0.71719800  | H          | -3.85907000 | 1.72982600  | -1.02343600 |
| O | 1.49574400  | 1.65364600  | -1.24627300 | H          | -5.78097500 | 2.58181700  | 0.31096000  |
| H | -2.27346600 | -2.67278900 | -2.06050400 | H          | -7.34520900 | 0.98434800  | 1.40290500  |
| H | -1.81293600 | -4.33005500 | -1.65112100 | C          | -3.16023600 | -0.84733800 | -1.50794500 |



|          |             |             |             |   |             |             |             |
|----------|-------------|-------------|-------------|---|-------------|-------------|-------------|
| H        | -3.24511000 | -1.93180400 | -1.63799000 | C | 3.68460700  | -0.15791100 | 2.11732700  |
| H        | -3.15827800 | -0.37259100 | -2.49451300 | H | 2.81607900  | -0.03128400 | 2.77334300  |
| C        | -1.85877300 | -0.52738700 | -0.81801700 | H | 4.45101700  | -0.70796700 | 2.67556300  |
| C        | -1.31896800 | -1.21770900 | 0.22379900  | H | 4.07846700  | 0.83376600  | 1.88595000  |
| H        | -1.04770400 | -0.51920700 | 1.23597400  | C | 3.79457300  | 0.87350300  | -0.97075300 |
| H        | -1.79285100 | -2.15102200 | 0.53515500  | H | 4.01735000  | 1.56939100  | -0.15972200 |
| C        | -1.12740400 | 0.70906400  | -1.28469400 | H | 4.70355600  | 0.74253600  | -1.57029200 |
| N        | 0.17485700  | 0.59085800  | -0.92495600 | H | 3.03251300  | 1.33743800  | -1.60133500 |
| O        | -1.66119900 | 1.62720700  | -1.90899700 | O | -1.96284300 | -0.36204900 | 1.63058000  |
| C        | 0.82493600  | 2.74808500  | -0.26758300 | O | 0.26692500  | -0.25005800 | 1.97383900  |
| C        | 1.95889300  | 3.76222300  | -0.43598300 | C | -0.89850200 | 0.01462100  | 2.29965300  |
| C        | 3.26672800  | 3.05898400  | -0.00419200 | C | -1.20591600 | 0.81794700  | 3.52758800  |
| H        | 4.09808800  | 3.77161200  | -0.02775500 | H | -0.37727800 | 0.75564700  | 4.23324300  |
| H        | 3.17798600  | 2.65948900  | 1.01134900  | H | -1.32104100 | 1.85424200  | 3.19520200  |
| H        | 3.50008100  | 2.22789500  | -0.67469600 | H | -2.14043600 | 0.48844300  | 3.98479500  |
| C        | 1.67730500  | 4.96369200  | 0.47726000  | C | -5.47592200 | -2.17563100 | 0.48059400  |
| H        | 2.47753300  | 5.70399000  | 0.37476200  | C | -4.46189400 | -2.30223600 | -0.47190300 |
| H        | 0.72673000  | 5.43775400  | 0.21884000  | C | -3.87871000 | -1.16956200 | -1.05228500 |
| H        | 1.61957000  | 4.65574800  | 1.52464200  | C | -4.32634600 | 0.10045400  | -0.65754900 |
| C        | 2.05605500  | 4.21261000  | -1.90749000 | C | -5.33705600 | 0.22653200  | 0.29465300  |
| H        | 2.87243600  | 4.93434500  | -2.01977800 | C | -5.91636400 | -0.90908300 | 0.86696100  |
| H        | 2.24714500  | 3.36399200  | -2.56822400 | H | -5.92095800 | -3.06559800 | 0.91783800  |
| H        | 1.12777600  | 4.69289700  | -2.23224400 | H | -4.12128400 | -3.29141700 | -0.77031100 |
| O        | -0.06771600 | 2.80919800  | 0.54021700  | H | -3.85489500 | 0.97743400  | -1.09073200 |
| O        | 0.99975600  | 1.71024200  | -1.14977600 | H | -5.67147500 | 1.21634900  | 0.59354500  |
| H        | 0.52993200  | -1.92786300 | -3.19652900 | H | -6.70440100 | -0.80736300 | 1.60813700  |
| H        | 1.14427200  | -3.58997500 | -3.17503900 | C | -2.73327600 | -1.30555100 | -2.04273800 |
| H        | -0.36882600 | -3.18519000 | -2.34742100 | H | -2.68129000 | -2.33525000 | -2.41137600 |
| H        | 1.64203600  | -3.57672700 | 2.69447800  | H | -2.90404100 | -0.64113700 | -2.89636300 |
| H        | 3.38848600  | -3.53272100 | 2.40646000  | C | -1.41028100 | -0.92002800 | -1.41211500 |
| H        | 2.52883500  | -2.05986000 | 2.88818600  | C | -0.58846500 | -1.72227200 | -0.70856700 |
| <b>6</b> |             |             |             | H | -1.70599300 | -0.78182500 | 0.77334300  |
| C        | 2.69089000  | -2.24117000 | 0.89493700  | H | -0.80908100 | -2.78486900 | -0.57808700 |
| C        | 2.42129000  | -2.62695800 | -0.44385900 | C | -1.00561100 | 0.53075600  | -1.50249000 |
| C        | 2.68288600  | -1.47379900 | -1.28550400 | N | 0.21365800  | 0.66804400  | -0.91736200 |
| C        | 3.31351400  | -0.44615900 | -0.45005900 | O | -1.68938500 | 1.42488900  | -2.00968900 |
| C        | 3.28710500  | -0.89767200 | 0.87658600  | C | 0.06550200  | 2.80405600  | 0.04772800  |
| Rh       | 1.11251100  | -0.90259800 | 0.04230700  | C | 0.48682100  | 4.25971500  | -0.16477700 |
| C        | 2.59357900  | -1.42127400 | -2.78040300 | C | 2.02551700  | 4.36887100  | -0.17980400 |
| C        | 1.92300200  | -3.95678500 | -0.91899600 | H | 2.31938800  | 5.41607500  | -0.30814100 |
| H        | 2.75761000  | -4.57410100 | -1.27284900 | H | 2.45653300  | 4.01097300  | 0.76214000  |
| H        | 1.41667600  | -4.50393100 | -0.12021200 | H | 2.45652500  | 3.78624300  | -0.99667600 |
| H        | 1.21710300  | -3.84316200 | -1.74559700 | C | -0.09731500 | 5.10977200  | 0.97245300  |
| C        | 2.54069300  | -3.06840400 | 2.13559300  | H | 0.16902300  | 6.16140400  | 0.82447900  |

|          |             |             |             |           |             |             |             |
|----------|-------------|-------------|-------------|-----------|-------------|-------------|-------------|
| H        | -1.18613000 | 5.02408700  | 1.00292900  | H         | -5.05701200 | 1.95301100  | 1.65170200  |
| H        | 0.28905500  | 4.78834600  | 1.94452900  | H         | -6.30701000 | -0.01858100 | 2.51412400  |
| C        | -0.09221900 | 4.70940300  | -1.52585200 | C         | -3.17931400 | -0.47738000 | -1.88814400 |
| H        | 0.15578200  | 5.76177000  | -1.70281700 | H         | -3.40340600 | -1.41186400 | -2.41283200 |
| H        | 0.31424000  | 4.10488600  | -2.33942600 | H         | -3.37087200 | 0.35097900  | -2.57868400 |
| H        | -1.17999400 | 4.59740000  | -1.54247400 | C         | -1.71576900 | -0.45364400 | -1.50027700 |
| O        | -0.72070000 | 2.41353600  | 0.87970100  | C         | -0.97166500 | -1.48044100 | -1.06944700 |
| O        | 0.68843100  | 2.00042100  | -0.86346900 | H         | -1.38256400 | -2.48820200 | -0.98384200 |
| H        | 2.31539100  | -0.41800800 | -3.11149400 | C         | -1.01942800 | 0.87680200  | -1.48696200 |
| H        | 3.55402100  | -1.68259300 | -3.24277100 | N         | 0.34162200  | 0.69635600  | -1.22655900 |
| H        | 1.83533800  | -2.11317500 | -3.15311300 | O         | -1.55980700 | 1.96140800  | -1.65964400 |
| H        | 1.86010900  | -3.90799200 | 1.97797200  | C         | 0.76331300  | 2.53104000  | 0.17479200  |
| H        | 3.50878600  | -3.47335500 | 2.45700400  | C         | 1.32286100  | 3.95463200  | 0.18443400  |
| H        | 2.14309300  | -2.46354100 | 2.95529400  | C         | 2.77072100  | 3.97163800  | -0.34610400 |
| <b>7</b> |             |             |             | H         | 3.15674700  | 4.99628100  | -0.32585700 |
| C        | 1.29372800  | -1.50339100 | 1.56285800  | H         | 3.42676000  | 3.35346800  | 0.27684100  |
| C        | 1.20777400  | -2.76362100 | 0.85068500  | H         | 2.82232700  | 3.60106700  | -1.37181600 |
| C        | 2.25648900  | -2.76832700 | -0.10345100 | C         | 1.27411900  | 4.49226200  | 1.62187800  |
| C        | 3.10611300  | -1.58886300 | 0.13255200  | H         | 1.62188600  | 5.53010000  | 1.64153600  |
| C        | 2.54258700  | -0.83881700 | 1.16920400  | H         | 0.25772200  | 4.45369400  | 2.02010900  |
| Rh       | 0.91835600  | -1.03500900 | -0.47689000 | H         | 1.91436700  | 3.90323600  | 2.28652500  |
| C        | 2.56481000  | -3.84398200 | -1.09862100 | C         | 0.41024100  | 4.79672200  | -0.73809500 |
| C        | 0.16909500  | -3.82257800 | 1.06212800  | H         | 0.75972700  | 5.83481800  | -0.75237600 |
| H        | 0.46467800  | -4.49635800 | 1.87515700  | H         | 0.41629700  | 4.40209900  | -1.75637100 |
| H        | -0.79682100 | -3.38337800 | 1.32281600  | H         | -0.62390200 | 4.78157400  | -0.38217800 |
| H        | 0.02549200  | -4.42530700 | 0.16203600  | O         | 0.16736000  | 1.99929700  | 1.08568600  |
| C        | 0.39856300  | -1.03561900 | 2.66626800  | O         | 1.01104300  | 1.93335100  | -1.02653900 |
| C        | 3.06186900  | 0.42515500  | 1.78103100  | H         | 2.95301000  | -3.42114500 | -2.02907100 |
| H        | 2.24125400  | 1.09213900  | 2.04912400  | H         | 3.32417000  | -4.53140600 | -0.70369000 |
| H        | 3.62921400  | 0.20342700  | 2.69382100  | H         | 1.67496700  | -4.42816200 | -1.34216800 |
| H        | 3.72515600  | 0.96051100  | 1.09723300  | H         | -0.56697700 | -1.54387700 | 2.63566700  |
| C        | 4.34986500  | -1.28371600 | -0.64289200 | H         | 0.86208700  | -1.23784900 | 3.64101500  |
| H        | 4.68299000  | -0.25695300 | -0.48011300 | H         | 0.21755700  | 0.03828600  | 2.58061100  |
| H        | 5.16484300  | -1.95647600 | -0.34743400 | <b>S2</b> |             |             |             |
| H        | 4.18829900  | -1.41847000 | -1.71651300 | C         | -0.70158100 | -0.43792900 | -0.09350000 |
| C        | -5.58455000 | -1.33412400 | 0.96431900  | C         | -1.91282000 | -0.31306500 | -0.07124500 |
| C        | -4.78551700 | -1.44768300 | -0.17619800 | C         | -3.32340200 | -0.13541900 | -0.04135500 |
| C        | -4.08075700 | -0.34420800 | -0.67099000 | C         | -4.19058700 | -1.24857800 | -0.04320400 |
| C        | -4.18797000 | 0.88227300  | 0.00196000  | C         | -3.88609200 | 1.15835600  | -0.00743300 |
| C        | -4.98390600 | 0.99635800  | 1.14126600  | C         | -5.57093000 | -1.06927300 | -0.01168000 |
| C        | -5.68582300 | -0.11051100 | 1.62739800  | H         | -3.76491300 | -2.24667200 | -0.06921700 |
| H        | -6.12906300 | -2.20040500 | 1.33106700  | C         | -5.26751300 | 1.32809300  | 0.02406700  |
| H        | -4.71188700 | -2.40313200 | -0.69095700 | H         | -3.22423600 | 2.01861300  | -0.00598000 |
| H        | -3.63084400 | 1.73546900  | -0.37306000 | C         | -6.11605000 | 0.21733100  | 0.02224300  |

|          |             |             |             |   |             |             |             |
|----------|-------------|-------------|-------------|---|-------------|-------------|-------------|
| H        | -6.22514800 | -1.93670400 | -0.01336300 | H | 4.83870600  | -1.55939900 | 0.46577800  |
| H        | -5.68484800 | 2.33088000  | 0.05019500  | H | 5.08034000  | -2.38323400 | -1.08043400 |
| H        | -7.19340000 | 0.35322300  | 0.04696500  | H | 4.24309100  | -0.82316200 | -1.02897800 |
| N        | 0.60607200  | -0.73321100 | -0.11373100 | C | -4.93117200 | 1.87266000  | -2.77942700 |
| N        | 1.38089300  | 0.29190200  | -0.10293000 | C | -3.92599300 | 1.07699300  | -3.33378800 |
| N        | 2.67451200  | 0.02481500  | -0.15982700 | C | -2.60122200 | 1.16892900  | -2.88691500 |
| C        | 3.53452500  | 1.20649100  | 0.06567100  | C | -2.29905100 | 2.08221800  | -1.86438700 |
| H        | 4.55768800  | 0.82314300  | 0.07512900  | C | -3.30357800 | 2.87632600  | -1.30992600 |
| C        | 3.39248200  | 2.20175300  | -1.09153900 | C | -4.62248600 | 2.77732600  | -1.76220600 |
| H        | 2.36145100  | 2.56043800  | -1.15094300 | H | -5.95257200 | 1.78225600  | -3.14002900 |
| H        | 3.64857800  | 1.72978900  | -2.04464100 | H | -4.17397100 | 0.36898500  | -4.12169100 |
| C        | 3.24751600  | 1.85365200  | 1.42742300  | H | -1.28200400 | 2.17832300  | -1.49857100 |
| H        | 2.22479400  | 2.23800800  | 1.45450500  | H | -3.05039800 | 3.57754800  | -0.51953600 |
| H        | 3.36348700  | 1.12795200  | 2.23768600  | H | -5.39980200 | 3.40034300  | -1.32761900 |
| C        | 3.20743400  | -1.35467200 | -0.16089000 | C | -1.52016200 | 0.30260200  | -3.52011500 |
| H        | 2.38591200  | -1.96157400 | -0.54685800 | H | -1.98591500 | -0.57426600 | -3.98305000 |
| C        | 4.40407500  | -1.49743200 | -1.10619200 | H | -1.02988100 | 0.87797200  | -4.31558000 |
| H        | 4.16663000  | -1.11209300 | -2.10195000 | C | -0.45112200 | -0.12327700 | -2.54074700 |
| H        | 4.66057400  | -2.55699200 | -1.20179100 | C | -0.54565000 | -1.11418400 | -1.65086000 |
| H        | 5.29592800  | -0.98055500 | -0.73713800 | H | -1.41296300 | -1.76402600 | -1.55252800 |
| C        | 3.51854300  | -1.81283900 | 1.27019700  | C | 0.74832800  | 0.75359700  | -2.42005400 |
| H        | 2.62856300  | -1.72342700 | 1.89859400  | N | 1.59949800  | 0.25115300  | -1.46261000 |
| H        | 3.84024700  | -2.85944900 | 1.27286300  | O | 0.92048100  | 1.78930800  | -3.06518100 |
| H        | 4.32205400  | -1.21208800 | 1.71090700  | C | 2.04961100  | 2.35984400  | -0.51485800 |
| H        | 3.93882000  | 2.68371700  | 1.60410500  | C | 3.11119900  | 3.45874200  | -0.47110500 |
| H        | 4.05387500  | 3.06043400  | -0.93903800 | C | 4.54275600  | 2.90426500  | -0.37400200 |
| <b>8</b> |             |             |             | H | 5.25293400  | 3.73729100  | -0.33384300 |
| C        | 1.15274100  | -3.49955700 | 0.48851500  | H | 4.67257000  | 2.30396000  | 0.53061200  |
| C        | 1.08867400  | -3.58682800 | -0.93642400 | H | 4.78874600  | 2.28261100  | -1.23754900 |
| C        | 2.22672500  | -2.88254300 | -1.46496700 | C | 2.80729100  | 4.38216400  | 0.72036700  |
| C        | 3.06472300  | -2.48124700 | -0.34555000 | H | 3.49021900  | 5.23849800  | 0.71069300  |
| C        | 2.40917300  | -2.86150500 | 0.84795100  | H | 1.78002800  | 4.74907100  | 0.66816800  |
| Rh       | 1.00462900  | -1.38866200 | -0.36485700 | H | 2.92904400  | 3.85206000  | 1.66948300  |
| C        | 2.59627100  | -2.70027100 | -2.90541000 | C | 2.93407800  | 4.22663500  | -1.80481800 |
| C        | 0.02634500  | -4.27666800 | -1.73618100 | H | 3.67336000  | 5.03320100  | -1.86564000 |
| H        | 0.31038300  | -5.31676200 | -1.93654000 | H | 3.05664600  | 3.55546700  | -2.65844200 |
| H        | -0.92839400 | -4.28671100 | -1.20399400 | H | 1.93213200  | 4.65937000  | -1.86784800 |
| H        | -0.13411700 | -3.77725800 | -2.69423400 | O | 0.89234400  | 2.50721400  | -0.20434200 |
| C        | 0.18450100  | -4.08711500 | 1.47122400  | O | 2.56626300  | 1.19390600  | -1.03676700 |
| C        | 2.88491000  | -2.70596800 | 2.26105700  | H | 2.96732700  | -1.68522300 | -3.07211000 |
| H        | 2.13063100  | -2.20958300 | 2.87838400  | H | 3.37764200  | -3.40904500 | -3.20648200 |
| H        | 3.08557900  | -3.68860400 | 2.70505100  | H | 1.73315400  | -2.84679300 | -3.55787900 |
| H        | 3.79802700  | -2.11259500 | 2.32188400  | H | -0.81781000 | -4.16320800 | 1.04360100  |
| C        | 4.37794100  | -1.77242200 | -0.50145700 | H | 0.49874100  | -5.09063700 | 1.78530900  |

|            |             |             |             |   |             |             |             |
|------------|-------------|-------------|-------------|---|-------------|-------------|-------------|
| H          | 0.11319700  | -3.46336500 | 2.36637000  | C | -3.49098500 | 2.57737200  | -2.29413900 |
| C          | -0.52269100 | -0.66057300 | 1.01689900  | C | -0.74428800 | 4.28920800  | -1.97080300 |
| C          | 0.57820300  | -0.14332500 | 1.35211900  | H | -0.90982300 | 5.37285400  | -1.93405900 |
| C          | 1.41084500  | 0.63964100  | 2.21854100  | H | 0.32993100  | 4.11396400  | -1.85993500 |
| C          | 2.81152200  | 0.66178400  | 2.10392400  | H | -1.03528600 | 3.93709200  | -2.96257400 |
| C          | 0.79803300  | 1.39333500  | 3.24157300  | C | 0.05680200  | 4.21495000  | 1.11117200  |
| C          | 3.58057800  | 1.39660700  | 3.00335700  | C | -2.19929800 | 2.69973700  | 2.72404700  |
| H          | 3.27734000  | 0.11731900  | 1.29274600  | H | -1.25584100 | 2.28450900  | 3.08983800  |
| C          | 1.57337600  | 2.13000800  | 4.13147800  | H | -2.34988600 | 3.67044600  | 3.21149300  |
| H          | -0.28511000 | 1.38911100  | 3.31359000  | H | -2.99701800 | 2.03046500  | 3.04858300  |
| C          | 2.96804400  | 2.13139500  | 4.02206300  | C | -4.39934800 | 1.62895300  | 0.54229400  |
| H          | 4.66237300  | 1.40272200  | 2.90400200  | H | -4.52074700 | 1.39073600  | 1.60127500  |
| H          | 1.08910300  | 2.70867100  | 4.91303300  | H | -5.26930700 | 2.21990300  | 0.23183900  |
| H          | 3.57030200  | 2.70635700  | 4.71919000  | H | -4.40882400 | 0.69004000  | -0.01800700 |
| N          | -1.83757200 | -0.97584800 | 0.98892200  | C | 4.76628200  | -1.43872500 | -2.88602300 |
| N          | -2.51889100 | -0.24719400 | 1.80531800  | C | 3.70232800  | -0.63510300 | -3.30855000 |
| N          | -3.81023600 | -0.49634100 | 1.84468200  | C | 2.37754200  | -1.05318100 | -3.14232200 |
| C          | -4.58044800 | 0.49804300  | 2.62820100  | C | 2.13001800  | -2.29393100 | -2.53174700 |
| H          | -5.62600600 | 0.20283100  | 2.52258400  | C | 3.19043500  | -3.09105800 | -2.10417600 |
| C          | -4.19755400 | 0.41982600  | 4.11009000  | C | 4.51264700  | -2.67029300 | -2.28189700 |
| H          | -3.14228600 | 0.67434100  | 4.24006500  | H | 5.78891900  | -1.09946600 | -3.02917300 |
| H          | -4.36090800 | -0.58763400 | 4.50443500  | H | 3.90581500  | 0.32513800  | -3.77744200 |
| C          | -4.41130800 | 1.91079900  | 2.05440500  | H | 1.10376700  | -2.62285700 | -2.39739900 |
| H          | -3.37057500 | 2.23347900  | 2.14227200  | H | 2.98376600  | -4.04737100 | -1.63149800 |
| H          | -4.68325900 | 1.94276600  | 0.99692100  | H | 5.33603400  | -3.29835100 | -1.95269400 |
| C          | -4.44535100 | -1.46294900 | 0.91715700  | C | 1.21739600  | -0.17548300 | -3.59204200 |
| H          | -3.68457500 | -2.23344600 | 0.77126000  | H | 1.60592300  | 0.75907900  | -4.01104500 |
| C          | -5.68333100 | -2.11872000 | 1.53302300  | H | 0.64930500  | -0.69458300 | -4.37176600 |
| H          | -5.47691800 | -2.50164500 | 2.53717700  | C | 0.27605600  | 0.11153100  | -2.44590500 |
| H          | -5.98603500 | -2.96051500 | 0.90278500  | C | 0.50106400  | 1.04266500  | -1.49006100 |
| H          | -6.53695100 | -1.43586500 | 1.58770100  | H | 1.32096100  | 1.75109400  | -1.57681100 |
| C          | -4.72706000 | -0.79680700 | -0.43476600 | C | -0.91254600 | -0.77333700 | -2.29647300 |
| H          | -3.82534300 | -0.33354300 | -0.83871500 | N | -1.72692300 | -0.26182600 | -1.32741300 |
| H          | -5.08488800 | -1.54095600 | -1.15425000 | O | -1.10926100 | -1.79347000 | -2.96608800 |
| H          | -5.49371000 | -0.02161100 | -0.34228300 | C | -2.39133200 | -2.34385000 | -0.42641000 |
| H          | -5.04460100 | 2.61570100  | 2.60282200  | C | -3.61675400 | -3.23937900 | -0.23570900 |
| H          | -4.79934900 | 1.12413100  | 4.69273400  | C | -4.80429900 | -2.45813200 | 0.35811200  |
| <b>TS9</b> |             |             |             | H | -5.64782400 | -3.13865700 | 0.51743300  |
| C          | -1.13643700 | 3.53912900  | 0.50296700  | H | -4.53756400 | -2.01576600 | 1.32288700  |
| C          | -1.52118400 | 3.59560900  | -0.89232500 | H | -5.13143900 | -1.65840400 | -0.31014200 |
| C          | -2.71968700 | 2.85059500  | -1.03861700 | C | -3.22290800 | -4.39487300 | 0.69784300  |
| C          | -3.12823300 | 2.38451900  | 0.28601000  | H | -4.06664100 | -5.08373800 | 0.81204400  |
| C          | -2.17821900 | 2.86202300  | 1.23296700  | H | -2.36921000 | -4.94364800 | 0.29467700  |
| Rh         | -1.15844400 | 1.43298900  | -0.26264000 | H | -2.94041600 | -4.01856900 | 1.68575100  |

|   |             |             |             |           |             |             |             |
|---|-------------|-------------|-------------|-----------|-------------|-------------|-------------|
| C | -3.98172000 | -3.77624200 | -1.63921100 | H         | 5.67127800  | 2.16736200  | -0.82921100 |
| H | -4.83676300 | -4.45749400 | -1.56489800 | H         | 6.10614700  | 0.57115800  | -0.19574800 |
| H | -4.23917700 | -2.95556600 | -2.31380100 | H         | 5.33460400  | -2.70375200 | 1.76141000  |
| H | -3.13862200 | -4.31704200 | -2.07826900 | H         | 4.81707800  | -1.70997500 | 4.09009700  |
| O | -1.24968900 | -2.66825500 | -0.22411200 | <b>10</b> |             |             |             |
| O | -2.77585800 | -1.11316700 | -0.92190900 | C         | 2.20128300  | 0.23135200  | -3.13847600 |
| H | -3.77125600 | 1.52170700  | -2.34450700 | C         | 3.27061800  | 0.68388700  | -2.24977200 |
| H | -4.40725100 | 3.17943100  | -2.33053100 | C         | 3.59152300  | -0.37702700 | -1.38671800 |
| H | -2.90006900 | 2.80410500  | -3.18386900 | C         | 2.73085000  | -1.51425100 | -1.72010500 |
| H | 0.90260200  | 4.22286200  | 0.41867600  | C         | 1.96057800  | -1.15298700 | -2.88260800 |
| H | -0.17051900 | 5.25586200  | 1.37548900  | Rh        | 1.33044100  | 0.01405900  | -1.07327000 |
| H | 0.37813900  | 3.69919100  | 2.01935900  | C         | 4.60110100  | -0.38538600 | -0.27912500 |
| C | 0.73847700  | 0.51725300  | 0.35513900  | C         | 3.90373700  | 2.04166500  | -2.28575400 |
| C | -0.28817800 | 0.02663100  | 0.97954800  | H         | 4.74178200  | 2.06250200  | -2.99388000 |
| C | -0.74459500 | -0.81788600 | 2.03977300  | H         | 3.19289500  | 2.80713200  | -2.60685000 |
| C | -2.08300300 | -0.79348500 | 2.47717900  | H         | 4.28540100  | 2.33651700  | -1.30545000 |
| C | 0.15109900  | -1.72309200 | 2.65055000  | C         | 1.61996300  | 1.03304900  | -4.26523500 |
| C | -2.50883100 | -1.62916500 | 3.50577800  | C         | 1.09694800  | -2.06878400 | -3.69134300 |
| H | -2.78198700 | -0.13298600 | 1.97921100  | H         | 0.25625900  | -1.53497400 | -4.14076700 |
| C | -0.28267300 | -2.55414000 | 3.67806200  | H         | 1.68506400  | -2.51578600 | -4.50279400 |
| H | 1.17281500  | -1.76100500 | 2.29101300  | H         | 0.68688700  | -2.87774100 | -3.08534600 |
| C | -1.61154800 | -2.51257500 | 4.11384700  | C         | 2.81845500  | -2.86934800 | -1.08658000 |
| H | -3.54645600 | -1.60029800 | 3.82739600  | H         | 1.87427400  | -3.40982900 | -1.18200200 |
| H | 0.41667400  | -3.24807700 | 4.13635400  | H         | 3.61302300  | -3.47203700 | -1.54509800 |
| H | -1.94637500 | -3.16868500 | 4.91191100  | H         | 3.03344500  | -2.77634400 | -0.01926100 |
| N | 2.05274500  | 0.91028300  | 0.53175900  | C         | -1.04804100 | 6.39143100  | -0.40201600 |
| N | 2.69640100  | 0.09438600  | 1.27252500  | C         | -0.19901200 | 5.34455200  | -0.76911700 |
| N | 3.94514400  | 0.42961400  | 1.56353000  | C         | 0.34085600  | 4.48875100  | 0.19783800  |
| C | 4.71701200  | -0.66866300 | 2.18619900  | C         | 0.01332000  | 4.69239300  | 1.54638500  |
| H | 5.74846800  | -0.30945700 | 2.22712700  | C         | -0.83422900 | 5.73756600  | 1.91186500  |
| C | 4.22840500  | -0.91690200 | 3.61814500  | C         | -1.36747800 | 6.59074300  | 0.94129600  |
| H | 3.17828000  | -1.22191400 | 3.61194000  | H         | -1.45659300 | 7.04879800  | -1.16476100 |
| H | 4.31752800  | -0.00977100 | 4.22342100  | H         | 0.04985800  | 5.19526200  | -1.81772000 |
| C | 4.68325500  | -1.93871200 | 1.32625600  | H         | 0.41933500  | 4.01293000  | 2.28991900  |
| H | 3.66753800  | -2.33736000 | 1.26748700  | H         | -1.08146300 | 5.88569300  | 2.95958800  |
| H | 5.01536200  | -1.73328500 | 0.30572900  | H         | -2.02768000 | 7.40366500  | 1.23067900  |
| C | 4.59548400  | 1.61931700  | 0.97710400  | C         | 1.24699500  | 3.33949900  | -0.21254100 |
| H | 3.77177900  | 2.30642300  | 0.77242200  | H         | 1.48257600  | 3.43087800  | -1.27672600 |
| C | 5.54418600  | 2.29109300  | 1.97417000  | H         | 2.18762100  | 3.38384600  | 0.34352800  |
| H | 5.04078900  | 2.48737600  | 2.92547600  | C         | 0.58996200  | 1.98576700  | 0.03077600  |
| H | 5.88256700  | 3.24644700  | 1.56085100  | C         | -0.41954700 | 1.57152500  | -0.82313000 |
| H | 6.43771500  | 1.69066800  | 2.17299600  | H         | -0.64335600 | 2.24893600  | -1.64963100 |
| C | 5.27274200  | 1.26486900  | -0.35302300 | C         | 1.04958500  | 1.29024900  | 1.30908400  |
| H | 4.56042400  | 0.79413300  | -1.03437300 | N         | 1.17525400  | -0.02517200 | 1.01092900  |

|   |             |             |             |           |             |             |             |
|---|-------------|-------------|-------------|-----------|-------------|-------------|-------------|
| O | 1.36497700  | 1.88725000  | 2.33544500  | C         | -4.62216800 | -2.59121300 | 0.89030000  |
| C | 1.47546900  | -1.27674200 | 2.97842700  | H         | -3.63865200 | -2.83572100 | 0.48143900  |
| C | 2.55245900  | -1.85009700 | 3.90650700  | H         | -4.48379300 | -2.18261400 | 1.89501200  |
| C | 3.39922500  | -2.88537500 | 3.13579600  | C         | -5.10048600 | 0.90712900  | 0.66243900  |
| H | 4.13448800  | -3.33682500 | 3.81044000  | H         | -4.50831400 | 1.72361300  | 0.24214700  |
| H | 2.77237000  | -3.68891600 | 2.73349900  | C         | -6.58075400 | 1.19770100  | 0.40355900  |
| H | 3.93848300  | -2.42250200 | 2.30573200  | H         | -6.80121800 | 1.19969900  | -0.66816500 |
| C | 1.85302800  | -2.52132800 | 5.09752200  | H         | -6.82869400 | 2.18438300  | 0.80718700  |
| H | 2.60110200  | -2.93135800 | 5.78386700  | H         | -7.24161000 | 0.47392300  | 0.89203500  |
| H | 1.23336800  | -1.80366500 | 5.64063800  | C         | -4.76783100 | 0.79797700  | 2.15699000  |
| H | 1.20082200  | -3.33360400 | 4.76471000  | H         | -3.70186700 | 0.60084700  | 2.29469200  |
| C | 3.44610000  | -0.68759100 | 4.39208300  | H         | -5.01452700 | 1.73344300  | 2.67024800  |
| H | 4.20007900  | -1.06748400 | 5.09022000  | H         | -5.34078400 | -0.00781100 | 2.62878800  |
| H | 3.95267200  | -0.20451000 | 3.55357000  | H         | -5.20507900 | -3.51492700 | 0.97031500  |
| H | 2.85106500  | 0.07409600  | 4.90445100  | H         | -6.12198800 | -3.07568700 | -1.39855400 |
| O | 0.28472700  | -1.30987800 | 3.16697300  | <b>8'</b> |             |             |             |
| O | 2.06862700  | -0.70929200 | 1.88252000  | C         | -1.70252200 | -3.48430100 | 0.40786300  |
| H | 4.13634600  | -0.69312000 | 0.66070800  | C         | -1.54395800 | -3.45685400 | -1.01472800 |
| H | 5.41280400  | -1.08784300 | -0.50408900 | C         | -0.14090300 | -3.34627300 | -1.29774400 |
| H | 5.04162700  | 0.60237600  | -0.12807300 | C         | 0.58233100  | -3.42050900 | -0.03601900 |
| H | 1.53715000  | 2.09073300  | -4.00137700 | C         | -0.37645400 | -3.49344100 | 1.00269700  |
| H | 2.25091700  | 0.96528800  | -5.16086400 | Rh        | -0.72713200 | -1.52102200 | -0.17552000 |
| H | 0.62178400  | 0.67699600  | -4.53025100 | C         | 0.49779000  | -3.29727700 | -2.65301500 |
| C | -1.29874500 | 0.37306200  | -0.68871600 | C         | -2.65457800 | -3.53502800 | -2.01720600 |
| C | -0.57690200 | -0.74161200 | -0.87088800 | H         | -2.83222200 | -4.57588100 | -2.31524500 |
| C | -0.92412500 | -2.15754800 | -0.81964900 | H         | -3.58555700 | -3.14206000 | -1.60096800 |
| C | -1.67588300 | -2.75724800 | -1.84784700 | H         | -2.42185800 | -2.95737700 | -2.91432200 |
| C | -0.50369100 | -2.95784600 | 0.25827400  | C         | -3.00352600 | -3.67709800 | 1.13157700  |
| C | -1.99372600 | -4.11384600 | -1.80250500 | C         | -0.10927200 | -3.53700500 | 2.47649700  |
| H | -2.02088600 | -2.14046500 | -2.67124500 | H         | -0.77922900 | -2.85609200 | 3.00960500  |
| C | -0.83391300 | -4.31218400 | 0.30618100  | H         | -0.26599400 | -4.54698500 | 2.87407700  |
| H | 0.04251600  | -2.49275200 | 1.06823400  | H         | 0.91271200  | -3.22985200 | 2.70410400  |
| C | -1.57328400 | -4.89865900 | -0.72459100 | C         | 2.07444200  | -3.41370200 | 0.09902100  |
| H | -2.57847700 | -4.55707400 | -2.60407200 | H         | 2.37838300  | -3.18378300 | 1.12226800  |
| H | -0.51837000 | -4.90959900 | 1.15734300  | H         | 2.50127100  | -4.38721600 | -0.17351300 |
| H | -1.82663700 | -5.95425900 | -0.68540400 | H         | 2.51100900  | -2.65541800 | -0.55197100 |
| N | -2.63499100 | 0.60888200  | -0.32376000 | C         | -3.93800800 | 4.47961600  | -0.95022700 |
| N | -3.38168800 | -0.40731900 | -0.48382900 | C         | -3.80800000 | 3.31637500  | -1.71452100 |
| N | -4.64092200 | -0.28861200 | -0.07574500 | C         | -2.54614400 | 2.82993700  | -2.07519100 |
| C | -5.34612100 | -1.58762200 | -0.02104000 | C         | -1.40723000 | 3.54035000  | -1.65969000 |
| H | -6.32806900 | -1.36993000 | 0.40613400  | C         | -1.53615300 | 4.69372600  | -0.88643900 |
| C | -5.54130400 | -2.14807800 | -1.43483400 | C         | -2.80104900 | 5.16780300  | -0.52532800 |
| H | -4.56909200 | -2.36707000 | -1.88387700 | H         | -4.92745800 | 4.84295800  | -0.68389600 |
| H | -6.06782200 | -1.43002100 | -2.07075400 | H         | -4.69733400 | 2.77276900  | -2.02432000 |

|   |             |             |             |             |             |             |             |
|---|-------------|-------------|-------------|-------------|-------------|-------------|-------------|
| H | -0.42283600 | 3.17819900  | -1.94073600 | H           | -5.01345100 | 2.67401000  | 1.01387900  |
| H | -0.64410600 | 5.22412100  | -0.56408800 | H           | -5.56505500 | -0.78170100 | 3.52758200  |
| H | -2.89840000 | 6.06604600  | 0.07796800  | H           | -6.47207700 | 1.29229700  | 2.49711200  |
| C | -2.40192500 | 1.52802200  | -2.84641300 | N           | 1.07653500  | -0.13469500 | 2.00675100  |
| H | -3.39232700 | 1.12923200  | -3.08802200 | N           | 1.46006200  | 1.09862500  | 2.04394600  |
| H | -1.86753700 | 1.71157400  | -3.78599400 | N           | 2.66075500  | 1.30321000  | 2.51555900  |
| C | -1.60605900 | 0.51142200  | -2.05561800 | C           | 3.12283500  | 2.71531200  | 2.52212800  |
| C | -2.08245700 | -0.40194600 | -1.20455400 | H           | 3.48678300  | 2.90742000  | 3.53858200  |
| H | -3.14591800 | -0.53399800 | -1.00386500 | C           | 4.27281300  | 2.93729500  | 1.52849800  |
| C | -0.11966900 | 0.54713500  | -2.20360100 | H           | 3.92263100  | 2.74292900  | 0.51393200  |
| N | 0.45964900  | -0.15425200 | -1.18301000 | H           | 5.13247100  | 2.29506500  | 1.73467500  |
| O | 0.47869200  | 1.13559200  | -3.11118200 | C           | 1.97122000  | 3.67977700  | 2.22919600  |
| C | 2.68640600  | 0.58674100  | -1.39746900 | H           | 1.59391800  | 3.53461500  | 1.21496500  |
| C | 3.95412300  | 0.30666900  | -2.21878500 | H           | 1.14087300  | 3.54573700  | 2.92596900  |
| C | 4.45786100  | -1.13753400 | -2.03437800 | C           | 3.50401100  | 0.16877300  | 2.96549000  |
| H | 5.37479600  | -1.27987800 | -2.61634400 | H           | 2.79160300  | -0.53069500 | 3.41452200  |
| H | 4.68842300  | -1.35451500 | -0.98651000 | C           | 4.14829700  | -0.53914500 | 1.76449900  |
| H | 3.72153300  | -1.86435800 | -2.38366900 | H           | 3.38689100  | -0.79180500 | 1.02526700  |
| C | 5.04743000  | 1.30297700  | -1.80653200 | H           | 4.63068500  | -1.46525000 | 2.09525600  |
| H | 5.92622500  | 1.17400400  | -2.44681200 | H           | 4.90495900  | 0.09003100  | 1.29040000  |
| H | 4.69168800  | 2.33105100  | -1.90230300 | C           | 4.51533000  | 0.57329000  | 4.03890600  |
| H | 5.35820700  | 1.15006500  | -0.76869400 | H           | 4.02573900  | 1.04519600  | 4.89581600  |
| C | 3.56754800  | 0.53491200  | -3.70014900 | H           | 5.01825000  | -0.33004700 | 4.39717000  |
| H | 4.44561200  | 0.36842800  | -4.33476800 | H           | 5.28642400  | 1.24982300  | 3.66154900  |
| H | 2.76729600  | -0.14301300 | -4.00173200 | H           | 2.35016200  | 4.70195500  | 2.32753500  |
| H | 3.20186200  | 1.55255000  | -3.85510300 | H           | 4.61300700  | 3.97542800  | 1.59981500  |
| O | 2.45430400  | 1.61212800  | -0.80117100 | <b>TS9'</b> |             |             |             |
| O | 1.82437800  | -0.47037000 | -1.48350000 | C           | 0.66226900  | 3.63575600  | 1.23458700  |
| H | 1.34754900  | -2.61147300 | -2.65234400 | C           | 0.61732400  | 4.03980600  | -0.15478400 |
| H | 0.85314700  | -4.29162500 | -2.95137400 | C           | -0.68360600 | 3.74290500  | -0.64441500 |
| H | -0.20806900 | -2.94838800 | -3.40978700 | C           | -1.47995100 | 3.21203000  | 0.45807600  |
| H | -3.73315600 | -2.90503500 | 0.86949200  | C           | -0.65536800 | 3.19589700  | 1.62075800  |
| H | -3.44251900 | -4.65224100 | 0.88811800  | Rh          | 0.18050400  | 1.78788100  | 0.03670800  |
| H | -2.86275700 | -3.64133300 | 2.21364500  | C           | -1.20533000 | 3.94424500  | -2.03522900 |
| C | -0.20271000 | -0.23578000 | 1.58738400  | C           | 1.76172300  | 4.62348200  | -0.92789000 |
| C | -1.44706300 | -0.18888800 | 1.50632400  | H           | 1.86335800  | 5.69864100  | -0.73348700 |
| C | -2.80436800 | 0.20263200  | 1.78245200  | H           | 2.70807800  | 4.14721700  | -0.65609200 |
| C | -3.32114100 | 1.37940100  | 1.20747100  | H           | 1.62377900  | 4.48860600  | -2.00294000 |
| C | -3.62769200 | -0.57214200 | 2.61895500  | C           | 1.84878300  | 3.79241700  | 2.13890500  |
| C | -4.63426300 | 1.76437800  | 1.46829300  | C           | -1.08395900 | 2.73643800  | 2.98322800  |
| H | -2.69160600 | 1.97594900  | 0.55809200  | H           | -0.22645300 | 2.60165700  | 3.64648700  |
| C | -4.93998400 | -0.17855800 | 2.87495300  | H           | -1.75142300 | 3.47131300  | 3.44879100  |
| H | -3.22577200 | -1.47157900 | 3.07225500  | H           | -1.61197600 | 1.78057500  | 2.91948500  |
| C | -5.44829700 | 0.98845800  | 2.29794500  | C           | -2.92670800 | 2.82671200  | 0.37494200  |

|   |             |             |             |            |             |             |             |
|---|-------------|-------------|-------------|------------|-------------|-------------|-------------|
| H | -3.19991100 | 2.16517900  | 1.20026100  | H          | 1.83532300  | 3.06058700  | 2.94915800  |
| H | -3.57911400 | 3.70875800  | 0.41063600  | C          | -0.05128000 | 0.01614200  | 1.03914300  |
| H | -3.12666700 | 2.29010300  | -0.55528900 | C          | 1.23687700  | -0.01890500 | 0.91922700  |
| C | 5.47379500  | -2.66823500 | -1.53096400 | C          | 2.40219600  | -0.34794600 | 1.73598700  |
| C | 4.93441600  | -1.46486800 | -1.99582400 | C          | 3.44867200  | -1.12916000 | 1.22071000  |
| C | 3.59668000  | -1.38902000 | -2.39921600 | C          | 2.46301100  | 0.08611300  | 3.07276700  |
| C | 2.80322500  | -2.54657900 | -2.34271500 | C          | 4.53333100  | -1.46899600 | 2.02756500  |
| C | 3.33973300  | -3.74466200 | -1.87364900 | H          | 3.39637400  | -1.47842500 | 0.19796900  |
| C | 4.67499600  | -3.81025700 | -1.46140600 | C          | 3.55155400  | -0.25267500 | 3.87425900  |
| H | 6.51436700  | -2.70917000 | -1.21956600 | H          | 1.64450300  | 0.67910800  | 3.47007000  |
| H | 5.55483600  | -0.57246500 | -2.02992300 | C          | 4.59113500  | -1.02869800 | 3.35201900  |
| H | 1.76433600  | -2.48355200 | -2.65498700 | H          | 5.32938300  | -2.08014900 | 1.61257800  |
| H | 2.71247800  | -4.63053900 | -1.82443900 | H          | 3.58942200  | 0.08648500  | 4.90580400  |
| H | 5.08823000  | -4.74470400 | -1.09205000 | H          | 5.43963300  | -1.29115900 | 3.97776500  |
| C | 2.97704500  | -0.06710400 | -2.81992700 | N          | -1.18612600 | -0.46922300 | 1.59761000  |
| H | 3.74344100  | 0.71547600  | -2.81884500 | N          | -1.19402500 | -1.75296400 | 1.67203800  |
| H | 2.57619200  | -0.15495200 | -3.83542000 | N          | -2.26022200 | -2.28247300 | 2.23678000  |
| C | 1.83369900  | 0.32040900  | -1.90575200 | C          | -2.35061100 | -3.75528800 | 2.09161700  |
| C | 1.97172600  | 0.90305900  | -0.69097300 | H          | -2.93128100 | -4.10622000 | 2.94891500  |
| H | 2.94982800  | 1.20775100  | -0.32434400 | C          | -3.07754600 | -4.13676600 | 0.79317000  |
| C | 0.45271400  | -0.00432800 | -2.36819900 | H          | -2.58079200 | -3.66783700 | -0.06019600 |
| N | -0.43659500 | 0.64029500  | -1.56898400 | H          | -4.12105800 | -3.80940800 | 0.80634300  |
| O | 0.18719400  | -0.72708700 | -3.33903000 | C          | -0.96386000 | -4.40211800 | 2.16803400  |
| C | -2.29286700 | -0.79758300 | -1.83908500 | H          | -0.36209800 | -4.15231900 | 1.29296800  |
| C | -3.57705900 | -0.91151300 | -2.66613100 | H          | -0.42389000 | -4.07084800 | 3.05933500  |
| C | -4.54622800 | 0.24197600  | -2.33712700 | C          | -3.39704500 | -1.43474500 | 2.66845100  |
| H | -5.46355400 | 0.13075300  | -2.92524900 | H          | -2.92420000 | -0.57899300 | 3.16077400  |
| H | -4.82321600 | 0.24060700  | -1.27754100 | C          | -4.20063100 | -0.89861000 | 1.47149800  |
| H | -4.10272000 | 1.21137400  | -2.57573400 | H          | -3.53574800 | -0.44983400 | 0.73352700  |
| C | -4.23826000 | -2.26401200 | -2.36595300 | H          | -4.90574200 | -0.13374600 | 1.81528200  |
| H | -5.13328700 | -2.38420800 | -2.98509700 | H          | -4.77377900 | -1.69631200 | 0.99226400  |
| H | -3.55228400 | -3.08786900 | -2.57599900 | C          | -4.29006500 | -2.14458800 | 3.68636200  |
| H | -4.53228600 | -2.33628700 | -1.31536300 | H          | -3.71291600 | -2.53124400 | 4.53165500  |
| C | -3.15542300 | -0.84164300 | -4.15267100 | H          | -5.01891300 | -1.42675400 | 4.07493000  |
| H | -4.03461500 | -0.98269700 | -4.79140300 | H          | -4.85204800 | -2.96971200 | 3.23739300  |
| H | -2.69847900 | 0.12361900  | -4.38058500 | H          | -1.08517700 | -5.48888500 | 2.21536900  |
| H | -2.41800000 | -1.61441200 | -4.38410400 | H          | -3.07147800 | -5.22422900 | 0.66490100  |
| O | -1.77150000 | -1.68733400 | -1.21307000 | <b>10'</b> |             |             |             |
| O | -1.78881200 | 0.47485100  | -1.94451900 | C          | 1.11252800  | -2.30290900 | -2.77588300 |
| H | -1.77200500 | 3.06806100  | -2.36009700 | C          | 1.30708400  | -3.37928900 | -1.79909100 |
| H | -1.86670600 | 4.81840200  | -2.07712000 | C          | 0.07236900  | -3.62890100 | -1.18607800 |
| H | -0.39352900 | 4.09723000  | -2.74912800 | C          | -0.91644000 | -2.70852000 | -1.76011500 |
| H | 2.78249900  | 3.64938800  | 1.58859300  | C          | -0.27420700 | -1.98607200 | -2.83185400 |
| H | 1.87570500  | 4.79399700  | 2.58637600  | Rh         | 0.47829400  | -1.36377600 | -0.81584000 |



|   |             |             |             |   |             |             |             |
|---|-------------|-------------|-------------|---|-------------|-------------|-------------|
| C | -0.23461200 | -4.58241500 | -0.07129500 | C | -2.16657000 | -2.01091100 | 4.57421400  |
| C | 2.61913800  | -4.05399300 | -1.53700500 | H | -2.87400500 | -2.49052600 | 5.25933400  |
| H | 2.87551700  | -4.74410900 | -2.35083600 | H | -1.36921200 | -2.71895500 | 4.33812800  |
| H | 3.43566000  | -3.32852500 | -1.46447500 | H | -1.71630800 | -1.15561500 | 5.08734900  |
| H | 2.60235700  | -4.62500500 | -0.60623400 | O | -1.93929200 | 0.28241100  | 2.00579000  |
| C | 2.18413500  | -1.77924100 | -3.68629800 | O | -0.91233600 | -1.75161900 | 2.02158200  |
| C | -0.96077400 | -1.06341100 | -3.79213100 | H | -0.70210100 | -4.05187000 | 0.76389200  |
| H | -0.24668100 | -0.41111000 | -4.29970100 | H | -0.92794400 | -5.36262800 | -0.40743100 |
| H | -1.49454900 | -1.64031000 | -4.55761600 | H | 0.66732800  | -5.06905400 | 0.30534200  |
| H | -1.67996400 | -0.42943600 | -3.26792500 | H | 3.14728300  | -1.71838600 | -3.17218900 |
| C | -2.38427700 | -2.70139600 | -1.45598500 | H | 2.31581000  | -2.43796600 | -4.55433100 |
| H | -2.78000000 | -1.68880500 | -1.55737000 | H | 1.93998000  | -0.78056900 | -4.05488700 |
| H | -2.93690900 | -3.36801600 | -2.13104800 | C | -0.28694100 | 0.51263200  | -0.86434500 |
| H | -2.57079000 | -3.02860500 | -0.43031400 | C | 0.78831300  | 1.31154600  | -0.67153900 |
| C | 6.62929100  | 1.15135300  | 0.66049400  | C | 1.00424100  | 2.76344800  | -0.76940700 |
| C | 5.69312600  | 0.15416000  | 0.37206000  | C | 2.07394300  | 3.34316600  | -0.06169300 |
| C | 4.56723900  | -0.02317800 | 1.18223100  | C | 0.22783100  | 3.59517500  | -1.59876700 |
| C | 4.38534200  | 0.81707600  | 2.29214500  | C | 2.34490900  | 4.70810400  | -0.16421400 |
| C | 5.31825900  | 1.81358300  | 2.57685600  | H | 2.68795500  | 2.72217600  | 0.58556300  |
| C | 6.44277200  | 1.98497100  | 1.76296800  | C | 0.50037400  | 4.95628500  | -1.69850700 |
| H | 7.49874700  | 1.27729200  | 0.02104000  | H | -0.59212000 | 3.16533000  | -2.16265700 |
| H | 5.84075700  | -0.49101200 | -0.49137700 | C | 1.55938000  | 5.52290500  | -0.97994400 |
| H | 3.50023700  | 0.68377600  | 2.90956200  | H | 3.17127200  | 5.13289700  | 0.39922500  |
| H | 5.16650700  | 2.46014200  | 3.43687500  | H | -0.11253700 | 5.57924900  | -2.34478500 |
| H | 7.16598800  | 2.76416700  | 1.98681300  | H | 1.76808500  | 6.58601900  | -1.05920100 |
| C | 3.52205800  | -1.07556900 | 0.84828400  | N | -1.63415200 | 0.72663600  | -1.07997400 |
| H | 3.81827400  | -1.61477000 | -0.05700900 | N | -2.06633500 | 1.80504500  | -0.54473100 |
| H | 3.45184600  | -1.80950100 | 1.65722000  | N | -3.35013600 | 2.07096600  | -0.70420300 |
| C | 2.15648400  | -0.43466500 | 0.63800500  | C | -3.81801100 | 3.21903700  | 0.10860200  |
| C | 1.97088900  | 0.43451600  | -0.41983900 | H | -4.90365400 | 3.23908200  | -0.01572600 |
| H | 2.83304500  | 0.57235900  | -1.07702300 | C | -3.49791400 | 3.02954900  | 1.59638200  |
| C | 1.16276300  | -0.64423200 | 1.78624100  | H | -2.41791700 | 2.99847400  | 1.75077200  |
| N | 0.11580300  | -1.23941200 | 1.20400100  | H | -3.90286300 | 2.08826200  | 1.97250000  |
| O | 1.40882500  | -0.39234800 | 2.96376200  | C | -3.23458400 | 4.52462100  | -0.44449000 |
| C | -1.89475800 | -0.86487500 | 2.37309200  | H | -2.14430200 | 4.51063200  | -0.36648400 |
| C | -2.90496000 | -1.55956000 | 3.29475400  | H | -3.50304500 | 4.65841800  | -1.49746600 |
| C | -3.50261400 | -2.78369000 | 2.56808400  | C | -4.27904000 | 1.10012300  | -1.31741900 |
| H | -4.24611000 | -3.26812800 | 3.21002800  | H | -3.66607000 | 0.55240800  | -2.03588900 |
| H | -4.00211600 | -2.48659500 | 1.63946100  | C | -4.78411800 | 0.11142000  | -0.25719400 |
| H | -2.72903500 | -3.51607800 | 2.32435200  | H | -3.93648700 | -0.33117400 | 0.26967600  |
| C | -4.01482800 | -0.55805900 | 3.64486800  | H | -5.37349800 | -0.68624500 | -0.72253000 |
| H | -4.72686400 | -1.02023200 | 4.33645200  | H | -5.41867900 | 0.62053800  | 0.47626800  |
| H | -3.60022000 | 0.33723100  | 4.11463000  | C | -5.41159300 | 1.78725300  | -2.08391500 |
| H | -4.55798200 | -0.24299500 | 2.74971900  | H | -5.01976600 | 2.53247200  | -2.78253300 |

|           |             |             |             |   |             |             |             |
|-----------|-------------|-------------|-------------|---|-------------|-------------|-------------|
| H         | -5.96371400 | 1.03626000  | -2.65799800 | O | -0.13328000 | 2.83424300  | 2.23162600  |
| H         | -6.12948800 | 2.27929300  | -1.42012200 | C | 2.74055800  | 0.37250900  | 1.90932600  |
| H         | -3.61498500 | 5.38067100  | 0.12213500  | C | 3.38544600  | 0.01082600  | 3.24133400  |
| H         | -3.92117800 | 3.85856100  | 2.17328300  | C | 4.20468400  | 1.20907300  | 3.76232000  |
| <b>II</b> |             |             |             |   |             |             |             |
| C         | 1.56512100  | -0.26743100 | -2.90663000 | H | 4.65103400  | 0.95188800  | 4.72813400  |
| C         | 1.22934400  | 1.13041100  | -2.78142000 | H | 5.01583300  | 1.46335800  | 3.07143700  |
| C         | 2.45195500  | 1.85946500  | -2.43796900 | H | 3.57313100  | 2.09058700  | 3.89359300  |
| C         | 3.47475500  | 0.92481500  | -2.23579000 | C | 4.27743500  | -1.22522800 | 3.05250700  |
| C         | 2.91155100  | -0.40947100 | -2.47251000 | H | 4.72013800  | -1.50319100 | 4.01408500  |
| Rh        | 1.70977400  | 0.41325900  | -0.77359100 | H | 3.69975800  | -2.07199100 | 2.67341500  |
| C         | 2.50286500  | 3.34485800  | -2.25620000 | H | 5.08830500  | -1.02505200 | 2.34549700  |
| C         | -0.02945400 | 1.75757000  | -3.29356200 | C | 2.22571900  | -0.30803400 | 4.21674200  |
| H         | 0.06303800  | 1.97038300  | -4.36713400 | H | 2.63938900  | -0.58224700 | 5.19269500  |
| H         | -0.88324800 | 1.09297400  | -3.15061900 | H | 1.57145600  | 0.55890300  | 4.33846200  |
| H         | -0.24653900 | 2.69355400  | -2.77747200 | H | 1.62671600  | -1.14589900 | 3.84632100  |
| C         | 0.62317200  | -1.33232200 | -3.38558900 | O | 2.83046000  | -0.34933000 | 0.90161100  |
| C         | 3.73208500  | -1.66277400 | -2.40058300 | O | 2.04906600  | 1.48502800  | 1.94698100  |
| H         | 3.14271400  | -2.55109200 | -2.63478600 | H | 3.47975400  | 3.67700100  | -1.89941900 |
| H         | 4.56164000  | -1.61257900 | -3.11604300 | H | 2.28956000  | 3.85886800  | -3.20053400 |
| H         | 4.16131200  | -1.79453600 | -1.40233400 | H | 1.75378900  | 3.66345700  | -1.52387600 |
| C         | 4.89055000  | 1.16365700  | -1.80521300 | H | -0.28945700 | -1.34865600 | -2.78083100 |
| H         | 5.14981300  | 0.52841300  | -0.95154700 | H | 0.34273100  | -1.14955100 | -4.42955700 |
| H         | 5.59506900  | 0.93017900  | -2.61330000 | H | 1.07510600  | -2.32506400 | -3.32942600 |
| H         | 5.05178400  | 2.20249300  | -1.50925200 | C | -1.19047800 | -0.04922300 | -0.25705900 |
| C         | -5.27231000 | 4.47461500  | -0.25319800 | C | 0.05307800  | -0.59236100 | -0.14928100 |
| C         | -3.94248900 | 4.34970800  | -0.66769300 | C | 0.30652300  | -1.88477000 | 0.51840400  |
| C         | -2.94119400 | 4.00138600  | 0.24316300  | C | 1.17032600  | -2.86079800 | -0.00743300 |
| C         | -3.28872700 | 3.77263800  | 1.58339400  | C | -0.24212500 | -2.12175000 | 1.79722400  |
| C         | -4.61288400 | 3.89906900  | 1.99707000  | C | 1.46288100  | -4.02781900 | 0.69712700  |
| C         | -5.61035100 | 4.25088200  | 1.08087100  | H | 1.61464700  | -2.69359600 | -0.98020900 |
| H         | -6.03980200 | 4.74531000  | -0.97350800 | C | 0.05025800  | -3.28668200 | 2.50415600  |
| H         | -3.68242500 | 4.52614300  | -1.70914400 | H | -0.90363900 | -1.37503800 | 2.22531500  |
| H         | -2.50466400 | 3.48548600  | 2.27945600  | C | 0.90634300  | -4.24944100 | 1.95881400  |
| H         | -4.87071300 | 3.72108100  | 3.03778000  | H | 2.12840800  | -4.76698400 | 0.25879400  |
| H         | -6.64256400 | 4.34680500  | 1.40652800  | H | -0.38505300 | -3.44008000 | 3.48839400  |
| C         | -1.49374600 | 3.85407600  | -0.19136000 | H | 1.13776700  | -5.15550900 | 2.51122900  |
| H         | -1.40286400 | 4.11645000  | -1.25306200 | N | -2.37352300 | -0.82446500 | -0.05301400 |
| H         | -0.87837500 | 4.56650100  | 0.36731900  | N | -2.35626900 | -1.91504100 | -0.69702100 |
| C         | -0.93723400 | 2.45440700  | 0.03841100  | N | -3.37874700 | -2.74456300 | -0.49294800 |
| C         | -1.52558800 | 1.36542800  | -0.49356500 | C | -3.21102400 | -4.05933900 | -1.14091500 |
| H         | -2.43923400 | 1.52788200  | -1.06677900 | H | -4.07769600 | -4.64890800 | -0.82733500 |
| C         | 0.10083200  | 2.35237300  | 1.12041500  | C | -3.25075200 | -3.91353300 | -2.66667700 |
| N         | 1.26003400  | 1.75307600  | 0.73164400  | H | -2.41639400 | -3.29115200 | -3.00241400 |
|           |             |             |             | H | -4.18358400 | -3.44128700 | -2.98903400 |

|             |             |             |             |   |             |             |             |
|-------------|-------------|-------------|-------------|---|-------------|-------------|-------------|
| C           | -1.93683600 | -4.77120800 | -0.66509200 | H | -1.91422400 | 4.05024100  | 2.01358600  |
| H           | -1.05092000 | -4.21188100 | -0.97261000 | H | -4.04448800 | 4.82496000  | 3.02985500  |
| H           | -1.91080100 | -4.85116200 | 0.42459700  | H | -5.93815200 | 5.52841500  | 1.57738100  |
| C           | -4.37417400 | -2.52260500 | 0.57461300  | C | -1.27397400 | 3.87808300  | -0.62062300 |
| H           | -4.26686000 | -1.46547100 | 0.82418700  | H | -1.33558600 | 3.91504900  | -1.71455600 |
| C           | -5.79876600 | -2.76198700 | 0.06491200  | H | -0.46314600 | 4.55343100  | -0.32752400 |
| H           | -6.00035400 | -2.15687800 | -0.82364000 | C | -0.92477800 | 2.47578900  | -0.16518500 |
| H           | -6.51912600 | -2.48416300 | 0.84114200  | C | -1.67910500 | 1.37159700  | -0.44811900 |
| H           | -5.97850700 | -3.81334500 | -0.18554500 | H | -2.67355200 | 1.54828800  | -0.85753400 |
| C           | -4.04064900 | -3.35566400 | 1.82062500  | C | 0.20724800  | 2.36264500  | 0.87554800  |
| H           | -3.01759900 | -3.15497600 | 2.15033500  | N | 1.05405000  | 2.03364200  | -0.07669900 |
| H           | -4.72670400 | -3.10731800 | 2.63730700  | O | 0.16214300  | 2.65570300  | 2.05502700  |
| H           | -4.13368600 | -4.42901400 | 1.62009500  | C | 3.12052200  | 0.79613000  | 1.52270000  |
| H           | -1.88286200 | -5.77904400 | -1.09078600 | C | 3.72491400  | 0.38440200  | 2.88490400  |
| H           | -3.16967400 | -4.89326300 | -3.14880600 | C | 4.69088300  | 1.46954200  | 3.38045300  |
| <b>TS12</b> |             |             |             | H | 5.06160900  | 1.21501400  | 4.37980200  |
| C           | 1.38253600  | -1.05638200 | -2.68173200 | H | 5.55317900  | 1.56435200  | 2.71146400  |
| C           | 0.99153500  | 0.30303300  | -2.98007800 | H | 4.19180000  | 2.43963000  | 3.42199800  |
| C           | 2.18052600  | 1.14187300  | -2.89406000 | C | 4.43283500  | -0.97612100 | 2.78983600  |
| C           | 3.24123700  | 0.34737400  | -2.41876700 | H | 4.83044500  | -1.25935900 | 3.77121800  |
| C           | 2.74220600  | -1.01852200 | -2.26390700 | H | 3.74136100  | -1.75201400 | 2.45427600  |
| Rh          | 1.52771900  | 0.26887800  | -0.84968100 | H | 5.27180300  | -0.93635500 | 2.08549400  |
| C           | 2.18588000  | 2.61750300  | -3.14909100 | C | 2.50432200  | 0.28082700  | 3.83142300  |
| C           | -0.34085400 | 0.72877700  | -3.51580900 | H | 2.83875300  | 0.04566600  | 4.84864400  |
| H           | -0.38442600 | 0.61634900  | -4.60701300 | H | 1.95029200  | 1.22410500  | 3.84869600  |
| H           | -1.14468900 | 0.12971200  | -3.08048400 | H | 1.82362400  | -0.50857400 | 3.49817400  |
| H           | -0.54099300 | 1.77622000  | -3.27650100 | O | 2.68220700  | -0.19753700 | 0.81804800  |
| C           | 0.48170600  | -2.24968500 | -2.80285300 | O | 3.00641900  | 1.99598500  | 1.22891800  |
| C           | 3.61304800  | -2.15230400 | -1.81303300 | H | 3.19744900  | 3.02600900  | -3.11497400 |
| H           | 3.08977700  | -3.11033400 | -1.84697800 | H | 1.75727300  | 2.84210700  | -4.13165600 |
| H           | 4.49806000  | -2.23076900 | -2.45458000 | H | 1.59126900  | 3.13405400  | -2.38734000 |
| H           | 3.95547400  | -1.98106300 | -0.78636700 | H | -0.45144000 | -2.09978400 | -2.25067000 |
| C           | 4.64268600  | 0.76176100  | -2.08754200 | H | 0.23142200  | -2.43048900 | -3.85524800 |
| H           | 4.93636900  | 0.35780400  | -1.11401300 | H | 0.95437800  | -3.15322000 | -2.41205800 |
| H           | 5.35461500  | 0.38678200  | -2.83374800 | C | -1.37019300 | 0.00442500  | -0.12616800 |
| H           | 4.73915200  | 1.84751400  | -2.03518100 | C | -0.10371800 | -0.52347800 | 0.08732800  |
| C           | -4.86039900 | 5.16354800  | -0.25373400 | C | 0.09742900  | -1.66716200 | 0.98515500  |
| C           | -3.65619300 | 4.73772200  | -0.82171400 | C | 1.06446500  | -2.66228400 | 0.75245300  |
| C           | -2.58547300 | 4.34806600  | -0.01138900 | C | -0.62452400 | -1.72911200 | 2.19943600  |
| C           | -2.73713700 | 4.37895000  | 1.38339200  | C | 1.27345900  | -3.69563300 | 1.66151200  |
| C           | -3.93780200 | 4.80401700  | 1.94881900  | H | 1.65445600  | -2.61375700 | -0.15037100 |
| C           | -5.00312700 | 5.19888600  | 1.13310000  | C | -0.40270100 | -2.75054600 | 3.11811900  |
| H           | -5.68351300 | 5.46487000  | -0.89587800 | H | -1.35631500 | -0.95735100 | 2.41320100  |
| H           | -3.54795900 | 4.71194800  | -1.90363900 | C | 0.54193600  | -3.74723800 | 2.85034100  |

|           |             |             |             |   |             |             |             |
|-----------|-------------|-------------|-------------|---|-------------|-------------|-------------|
| H         | 2.01921800  | -4.45617900 | 1.44746900  | H | 4.84209100  | -0.28819400 | -1.37754900 |
| H         | -0.96094800 | -2.76469100 | 4.05012700  | H | 5.24495900  | 0.98687500  | -2.53891000 |
| H         | 0.71549800  | -4.54449500 | 3.56721200  | H | 4.83173900  | 1.38597100  | -0.84990100 |
| N         | -2.54585400 | -0.79385400 | 0.02598000  | C | -3.97659000 | 5.17185900  | -0.42344600 |
| N         | -2.40602100 | -1.94863000 | -0.48444400 | C | -2.65022200 | 4.76755300  | -0.26770300 |
| N         | -3.39093600 | -2.81344700 | -0.28588600 | C | -2.18997000 | 4.28280800  | 0.96266800  |
| C         | -3.11251400 | -4.17017400 | -0.79839500 | C | -3.08622800 | 4.20721100  | 2.03583700  |
| H         | -3.93555200 | -4.79003500 | -0.43136800 | C | -4.41359200 | 4.60982500  | 1.88420400  |
| C         | -3.14179100 | -4.18649600 | -2.33113400 | C | -4.86228700 | 5.09353500  | 0.65333400  |
| H         | -2.35188000 | -3.54383500 | -2.72980500 | H | -4.31745300 | 5.54878400  | -1.38353900 |
| H         | -4.10298000 | -3.82376100 | -2.70729300 | H | -1.96352000 | 4.82774100  | -1.10832800 |
| C         | -1.79813700 | -4.72731900 | -0.23579900 | H | -2.74069100 | 3.82447300  | 2.99278100  |
| H         | -0.94889200 | -4.14341300 | -0.59562000 | H | -5.09628200 | 4.54688900  | 2.72672600  |
| H         | -1.78688200 | -4.68390900 | 0.85650900  | H | -5.89477300 | 5.40904400  | 0.53465900  |
| C         | -4.51195900 | -2.54829300 | 0.64036000  | C | -0.76418700 | 3.80947400  | 1.11725200  |
| H         | -4.47808600 | -1.46996600 | 0.80345500  | H | -0.10967800 | 4.38700800  | 0.44741300  |
| C         | -5.85663600 | -2.90440100 | -0.00152100 | H | -0.41076900 | 4.03135700  | 2.13503900  |
| H         | -5.98498400 | -2.37889900 | -0.95220800 | C | -0.55452500 | 2.33400200  | 0.83664800  |
| H         | -6.67253000 | -2.61101200 | 0.66670400  | C | -1.52061100 | 1.46128100  | 0.50087200  |
| H         | -5.95592100 | -3.97957500 | -0.18613000 | H | -2.53206700 | 1.85079200  | 0.47250000  |
| C         | -4.28212100 | -3.25510000 | 1.98333700  | C | 1.68484300  | 2.55543200  | 1.49879300  |
| H         | -3.31569200 | -2.96615000 | 2.40519800  | N | 0.80917600  | 1.88324100  | 0.92477600  |
| H         | -5.07005000 | -2.98248400 | 2.69302100  | O | 2.43209400  | 3.27386300  | 2.03344600  |
| H         | -4.29635300 | -4.34484200 | 1.87057300  | C | 3.41180300  | -0.29953300 | 1.38419300  |
| H         | -1.66639100 | -5.76871700 | -0.54726900 | C | 4.21264800  | -1.32067800 | 2.22466400  |
| H         | -2.98125000 | -5.20241000 | -2.70636800 | C | 5.37284300  | -0.61828500 | 2.94062700  |
| <b>13</b> |             |             |             | H | 5.93670400  | -1.33839100 | 3.54479700  |
| C         | 1.00313600  | 0.21731800  | -2.80153000 | H | 6.05529500  | -0.15660600 | 2.22114300  |
| C         | 0.97899200  | 1.59241500  | -2.41391200 | H | 5.00364400  | 0.17621500  | 3.59430600  |
| C         | 2.33971700  | 1.97386900  | -2.01569900 | C | 4.74581200  | -2.41607100 | 1.27860300  |
| C         | 3.15062500  | 0.83244700  | -2.06452000 | H | 5.31497300  | -3.16354100 | 1.84309700  |
| C         | 2.31579300  | -0.29103000 | -2.49269100 | H | 3.91909400  | -2.91567000 | 0.76747200  |
| Rh        | 1.41597300  | 0.39465900  | -0.60992500 | H | 5.41490200  | -1.98908000 | 0.52142300  |
| C         | 2.76719300  | 3.33455000  | -1.55661800 | C | 3.24646100  | -1.95330400 | 3.24805200  |
| C         | -0.18583500 | 2.51718900  | -2.60291800 | H | 3.77081900  | -2.70437600 | 3.85067100  |
| H         | -0.24376600 | 2.87196100  | -3.64027200 | H | 2.84884300  | -1.19293900 | 3.93002800  |
| H         | -1.12455900 | 2.01468000  | -2.35763400 | H | 2.40512000  | -2.43101200 | 2.73960300  |
| H         | -0.10681200 | 3.39365300  | -1.95594700 | O | 2.45163500  | -0.84149200 | 0.71002500  |
| C         | -0.15978200 | -0.52104700 | -3.39750800 | O | 3.69125500  | 0.91077300  | 1.38453000  |
| C         | 2.87351200  | -1.65712200 | -2.76398800 | H | 3.48468700  | 3.26099800  | -0.73503100 |
| H         | 2.15553800  | -2.29901100 | -3.27777700 | H | 3.24090800  | 3.89287400  | -2.37295500 |
| H         | 3.76437900  | -1.57862800 | -3.39711000 | H | 1.91508500  | 3.92478100  | -1.20936900 |
| H         | 3.16282700  | -2.14939200 | -1.83048100 | H | -0.99340600 | -0.58382900 | -2.68988000 |
| C         | 4.59828400  | 0.73006000  | -1.69028400 | H | -0.51183000 | -0.00390400 | -4.29709100 |

|            |             |             |             |   |             |             |             |
|------------|-------------|-------------|-------------|---|-------------|-------------|-------------|
| H          | 0.11241500  | -1.53942900 | -3.68239100 | C | 2.51826400  | 1.93316800  | -2.37426700 |
| C          | -1.39214300 | 0.02182800  | 0.27812000  | C | 0.59455700  | -0.17795300 | -3.85026200 |
| C          | -0.24082200 | -0.64473200 | -0.01414400 | H | 0.95274100  | 0.02790100  | -4.86659300 |
| C          | -0.08753300 | -2.09324500 | 0.21752800  | H | -0.12251100 | -1.00013100 | -3.90064900 |
| C          | 0.44641700  | -2.97182500 | -0.73610700 | H | 0.05737300  | 0.70136500  | -3.48834400 |
| C          | -0.39173700 | -2.61924000 | 1.48967700  | C | 1.68133900  | -3.12516200 | -3.09184900 |
| C          | 0.65727100  | -4.31919600 | -0.44730900 | C | 4.13399600  | -2.80848700 | -1.15257200 |
| H          | 0.68788700  | -2.58821300 | -1.71610500 | H | 3.46588300  | -3.49703800 | -0.62271100 |
| C          | -0.18025500 | -3.96446800 | 1.78381300  | H | 4.62996800  | -3.37851000 | -1.94767300 |
| H          | -0.79218200 | -1.95211300 | 2.24631500  | H | 4.89831600  | -2.47093500 | -0.45007600 |
| C          | 0.34650800  | -4.82570700 | 0.81599800  | C | 4.80382900  | 0.34141500  | -0.85382100 |
| H          | 1.06488800  | -4.97521200 | -1.21223400 | H | 5.17296400  | -0.30444400 | -0.05218300 |
| H          | -0.41720300 | -4.34030700 | 2.77580400  | H | 5.63630900  | 0.51990600  | -1.54700200 |
| H          | 0.51716100  | -5.87329700 | 1.04656400  | H | 4.52121200  | 1.29580800  | -0.40883100 |
| N          | -2.63234100 | -0.64864400 | 0.52926300  | C | -4.22709200 | 5.04065900  | -1.86632100 |
| N          | -2.91003400 | -1.50817600 | -0.35710200 | C | -2.98362900 | 4.45637000  | -2.12730600 |
| N          | -4.01219800 | -2.23351400 | -0.15829300 | C | -2.12613700 | 4.10163800  | -1.08113600 |
| C          | -4.16840100 | -3.34400900 | -1.11850100 | C | -2.53406200 | 4.33793600  | 0.24076000  |
| H          | -5.04118300 | -3.90500500 | -0.77216600 | C | -3.77225400 | 4.92139100  | 0.50105100  |
| C          | -4.46703600 | -2.79852900 | -2.51992500 | C | -4.62453300 | 5.27542600  | -0.55061200 |
| H          | -3.62586100 | -2.19260600 | -2.86872000 | H | -4.88111800 | 5.31053100  | -2.69141800 |
| H          | -5.36338800 | -2.17103000 | -2.51197800 | H | -2.67690900 | 4.27759500  | -3.15572100 |
| C          | -2.95365500 | -4.28157500 | -1.11563500 | H | -1.86536100 | 4.04681600  | 1.04598100  |
| H          | -2.06706400 | -3.75732700 | -1.47668700 | H | -4.07614300 | 5.10132300  | 1.52906000  |
| H          | -2.73102400 | -4.64202900 | -0.10821200 | H | -5.58990400 | 5.72947100  | -0.34376300 |
| C          | -4.74561500 | -2.20219800 | 1.12262500  | C | -0.78002400 | 3.45363200  | -1.35433600 |
| H          | -4.48060500 | -1.23726100 | 1.55855500  | H | -0.61607300 | 3.40787000  | -2.43762800 |
| C          | -6.26089300 | -2.23602500 | 0.90287500  | H | 0.01415500  | 4.07379300  | -0.93012300 |
| H          | -6.57251200 | -1.44513900 | 0.21436100  | C | -0.66224300 | 2.04680000  | -0.77016700 |
| H          | -6.77277500 | -2.08307800 | 1.85854500  | C | -1.50752600 | 1.07755900  | -1.17287200 |
| H          | -6.60292400 | -3.19631800 | 0.50196500  | H | -2.30023300 | 1.34836900  | -1.87098400 |
| C          | -4.25417500 | -3.31169600 | 2.06359800  | C | 0.25406900  | 1.96491500  | 0.42983700  |
| H          | -3.16935900 | -3.25228300 | 2.18583600  | N | 1.15092700  | 0.94961600  | 0.47571100  |
| H          | -4.72470100 | -3.21390300 | 3.04782900  | O | 0.17296300  | 2.86456400  | 1.28066900  |
| H          | -4.50220600 | -4.30380000 | 1.67006000  | C | 2.83197500  | 1.94258100  | 1.80172300  |
| H          | -3.14048300 | -5.14530300 | -1.76282900 | C | 3.36182200  | 2.01612400  | 3.23644800  |
| H          | -4.62037600 | -3.61984800 | -3.22758200 | C | 2.20356300  | 2.50177400  | 4.13694500  |
| <b>11'</b> |             |             |             | H | 2.55731300  | 2.60562100  | 5.16875100  |
| C          | 2.18784700  | -1.81496400 | -2.57179200 | H | 1.82422900  | 3.46819000  | 3.79426700  |
| C          | 1.73543700  | -0.51402000 | -2.93946200 | H | 1.37083800  | 1.79563900  | 4.11387200  |
| C          | 2.58319700  | 0.44327200  | -2.25569800 | C | 4.52800800  | 3.01356500  | 3.27775200  |
| C          | 3.64365400  | -0.28327600 | -1.56941000 | H | 4.91131300  | 3.09489900  | 4.30024500  |
| C          | 3.37097900  | -1.65732700 | -1.73216300 | H | 5.34499900  | 2.69246200  | 2.62473400  |
| Rh         | 1.51738600  | -0.68615000 | -0.73698300 | H | 4.20645800  | 4.00253700  | 2.94292600  |

|   |             |             |             |              |             |             |             |
|---|-------------|-------------|-------------|--------------|-------------|-------------|-------------|
| C | 3.83719000  | 0.61886800  | 3.68791900  | H            | -6.56913200 | 0.25289800  | 0.80584700  |
| H | 4.22648200  | 0.67345500  | 4.71022700  | H            | -6.01162800 | -0.73452700 | 2.16832200  |
| H | 3.01766300  | -0.10354700 | 3.66818700  | H            | -3.63844800 | -3.41745800 | 3.82436200  |
| H | 4.63956300  | 0.24676300  | 3.04074100  | H            | -3.59217600 | -5.27535000 | 2.03860100  |
| O | 3.19891800  | 2.64023900  | 0.88146200  | <b>TS12'</b> |             |             |             |
| O | 1.88297600  | 0.97433100  | 1.71039000  | C            | 1.97980200  | -1.70040400 | -2.66538500 |
| H | 2.67211100  | 2.40152500  | -1.39930400 | C            | 1.68749100  | -0.33005400 | -2.90846100 |
| H | 3.30136200  | 2.28417100  | -3.05844000 | C            | 2.70636100  | 0.45409000  | -2.22525800 |
| H | 1.55383000  | 2.25779400  | -2.76768600 | C            | 3.68969500  | -0.44443600 | -1.67073900 |
| H | 0.63464900  | -3.05607600 | -3.39780500 | C            | 3.20610100  | -1.76413700 | -1.88558400 |
| H | 2.26518700  | -3.44749000 | -3.96352900 | Rh           | 1.60515700  | -0.68518600 | -0.69632800 |
| H | 1.75301400  | -3.90680200 | -2.33239300 | C            | 2.81695100  | 1.94739600  | -2.20515400 |
| C | -1.55992200 | -0.29115400 | -0.63919000 | C            | 0.54443500  | 0.18249300  | -3.72983000 |
| C | -0.44698700 | -1.01050900 | -0.45060400 | H            | 0.68803900  | -0.06946300 | -4.78756000 |
| C | -0.03178100 | -2.23308100 | 0.18725800  | H            | -0.40445300 | -0.25361800 | -3.40114300 |
| C | -0.20123900 | -3.52993900 | -0.38052000 | H            | 0.44682900  | 1.26534200  | -3.64822600 |
| C | 0.82955000  | -2.09740000 | 1.32017800  | C            | 1.21868600  | -2.87720100 | -3.19264400 |
| C | 0.47698000  | -4.61520100 | 0.13517700  | C            | 3.85978600  | -3.04217700 | -1.46053600 |
| H | -0.87334000 | -3.63995700 | -1.22459200 | H            | 3.13788400  | -3.71665500 | -0.98853600 |
| C | 1.53446100  | -3.21699900 | 1.80630900  | H            | 4.28291600  | -3.56246900 | -2.32873300 |
| H | 0.85665800  | -1.16274100 | 1.86701500  | H            | 4.66623800  | -2.86207700 | -0.74691700 |
| C | 1.37484700  | -4.46031300 | 1.21673700  | C            | 4.98431400  | -0.04164700 | -1.03358700 |
| H | 0.32476100  | -5.60052800 | -0.29738700 | H            | 5.32483500  | -0.79076000 | -0.31380800 |
| H | 2.18645900  | -3.09686700 | 2.66679000  | H            | 5.77026200  | 0.07217400  | -1.79222000 |
| H | 1.90863700  | -5.32372000 | 1.60250500  | H            | 4.87870500  | 0.90124200  | -0.49813500 |
| N | -2.89087100 | -0.70917400 | -0.34421800 | C            | -4.16080100 | 5.13991100  | -1.50280800 |
| N | -2.95415500 | -1.73683400 | 0.39336600  | C            | -3.06784600 | 4.41370000  | -1.98487100 |
| N | -4.17512300 | -2.19891400 | 0.65567400  | C            | -1.93169200 | 4.21773700  | -1.19241100 |
| C | -4.19328000 | -3.20879000 | 1.73394200  | C            | -1.90659100 | 4.76230900  | 0.10108600  |
| H | -5.24887200 | -3.40551700 | 1.93572500  | C            | -2.99535400 | 5.48745400  | 0.58187200  |
| C | -3.53703200 | -4.51050200 | 1.25691100  | C            | -4.12718100 | 5.67969600  | -0.21733500 |
| H | -2.48492600 | -4.33512600 | 1.01638900  | H            | -5.03463900 | 5.28352100  | -2.13299100 |
| H | -4.03758300 | -4.89161300 | 0.36142100  | H            | -3.09724300 | 3.99775900  | -2.98973100 |
| C | -3.54405900 | -2.67935600 | 3.02112600  | H            | -1.02588100 | 4.59813000  | 0.71488000  |
| H | -2.48252500 | -2.47914700 | 2.85334000  | H            | -2.96238500 | 5.90579400  | 1.58453500  |
| H | -4.02058000 | -1.75022000 | 3.34630600  | H            | -4.97414300 | 6.24605300  | 0.16026300  |
| C | -5.38211700 | -1.46954600 | 0.21351800  | C            | -0.75490500 | 3.40244500  | -1.69830600 |
| H | -5.08866000 | -1.01960000 | -0.73830300 | H            | -0.88338200 | 3.21417900  | -2.77113800 |
| C | -6.55873900 | -2.41529900 | -0.03874400 | H            | 0.16642400  | 3.97740200  | -1.57083100 |
| H | -6.26253500 | -3.25458200 | -0.67524100 | C            | -0.59614600 | 2.07228700  | -0.97380500 |
| H | -7.35724900 | -1.86544200 | -0.54652100 | C            | -1.53260500 | 1.08675300  | -1.14841500 |
| H | -6.98262500 | -2.81542400 | 0.88815300  | H            | -2.41643700 | 1.31969900  | -1.74080900 |
| C | -5.72814600 | -0.33524100 | 1.18809700  | C            | 0.39937400  | 2.05319900  | 0.09729800  |
| H | -4.87114900 | 0.33148200  | 1.30997100  | N            | 0.79219900  | 0.78378700  | 0.58989300  |

|   |             |             |             |            |             |             |             |
|---|-------------|-------------|-------------|------------|-------------|-------------|-------------|
| O | 0.85272800  | 3.09011100  | 0.60313400  | C          | -4.12560900 | -2.14570100 | 3.06691400  |
| C | 2.57102600  | 1.43526200  | 2.02974800  | H          | -3.11129600 | -1.74256800 | 3.12715600  |
| C | 2.86613900  | 1.82031700  | 3.48188500  | H          | -4.82360300 | -1.30591200 | 3.01059300  |
| C | 1.93842500  | 2.99882400  | 3.85456600  | C          | -5.20681800 | -1.92202500 | -0.28503600 |
| H | 2.15967700  | 3.33048600  | 4.87496900  | H          | -4.73588900 | -1.60861700 | -1.22070200 |
| H | 2.08233600  | 3.83896200  | 3.17016600  | C          | -6.13571400 | -3.10114600 | -0.58644000 |
| H | 0.88905000  | 2.70215600  | 3.79721400  | H          | -5.56878100 | -3.97015700 | -0.93394900 |
| C | 4.33834800  | 2.24434100  | 3.58166100  | H          | -6.84067400 | -2.81347300 | -1.37286400 |
| H | 4.56762000  | 2.54447300  | 4.60928600  | H          | -6.72902600 | -3.40104800 | 0.28376400  |
| H | 5.00572900  | 1.42401000  | 3.30166400  | C          | -5.95627700 | -0.71207900 | 0.29212700  |
| H | 4.54739700  | 3.08495100  | 2.91565300  | H          | -5.26049100 | 0.11047200  | 0.47446200  |
| C | 2.59089900  | 0.61403500  | 4.40471400  | H          | -6.72290700 | -0.36563100 | -0.40954700 |
| H | 2.81746300  | 0.88431700  | 5.44142100  | H          | -6.45338200 | -0.97119600 | 1.23333000  |
| H | 1.54443900  | 0.30396100  | 4.35169600  | H          | -4.33360300 | -2.70734200 | 3.98370500  |
| H | 3.22094000  | -0.24172500 | 4.13582300  | H          | -3.45536000 | -4.82394000 | 2.82444800  |
| O | 3.34014700  | 1.52482300  | 1.10283000  | <b>13'</b> |             |             |             |
| O | 1.29538300  | 0.95013100  | 1.93389900  | C          | 1.59401300  | -3.91988600 | -0.19984900 |
| H | 3.02417300  | 2.30269000  | -1.19232600 | C          | 1.06699200  | -3.44061700 | -1.47967500 |
| H | 3.63286000  | 2.27388000  | -2.86155100 | C          | 1.97399400  | -2.46906200 | -1.98871000 |
| H | 1.89528700  | 2.42190400  | -2.54426900 | C          | 3.02920600  | -2.28665400 | -1.00076300 |
| H | 0.17119500  | -2.61875400 | -3.37134800 | C          | 2.80852600  | -3.24736000 | 0.07083000  |
| H | 1.64540400  | -3.22907900 | -4.14080200 | Rh         | 1.20149800  | -1.72093800 | -0.08111600 |
| H | 1.23969000  | -3.71005100 | -2.48561200 | C          | 1.87736900  | -1.74011300 | -3.29066400 |
| C | -1.52726900 | -0.18333000 | -0.50449800 | C          | -0.14624600 | -3.98775900 | -2.16113300 |
| C | -0.34057500 | -0.66873600 | 0.00132900  | H          | 0.09008000  | -4.93968100 | -2.65359100 |
| C | 0.11213300  | -1.94509900 | 0.49404000  | H          | -0.95375800 | -4.16444900 | -1.44825100 |
| C | -0.34281400 | -3.15781200 | -0.12402000 | H          | -0.52031900 | -3.29786200 | -2.91949000 |
| C | 1.21887700  | -2.02168800 | 1.39436200  | C          | 0.95882900  | -4.98995100 | 0.63111400  |
| C | 0.28007800  | -4.35396500 | 0.14050700  | C          | 3.68636800  | -3.36948500 | 1.27558200  |
| H | -1.18976700 | -3.10924700 | -0.79663200 | H          | 3.33655900  | -4.15050400 | 1.95333600  |
| C | 1.84635800  | -3.26765800 | 1.62965100  | H          | 4.71303400  | -3.60744700 | 0.97746400  |
| H | 1.46333400  | -1.18291700 | 2.02851200  | H          | 3.69642700  | -2.41747800 | 1.81743400  |
| C | 1.39831600  | -4.41658000 | 1.01014000  | C          | 4.23297300  | -1.41225300 | -1.11711200 |
| H | -0.09018700 | -5.26378200 | -0.32384700 | H          | 4.56745000  | -1.10293300 | -0.12455600 |
| H | 2.67531100  | -3.30899600 | 2.33023200  | H          | 5.04766600  | -1.96714400 | -1.60158500 |
| H | 1.87597100  | -5.37143000 | 1.20815500  | H          | 3.99922800  | -0.51199900 | -1.68156700 |
| N | -2.79347700 | -0.80425600 | -0.39837300 | C          | 1.88081600  | 5.73338800  | 0.28367800  |
| N | -2.90191700 | -1.66761700 | 0.51994900  | C          | 1.19383500  | 4.95428200  | -0.64734300 |
| N | -4.07528000 | -2.32475700 | 0.57194800  | C          | 1.88450700  | 4.10696400  | -1.52355300 |
| C | -4.25864000 | -3.05940100 | 1.83869900  | C          | 3.27850700  | 4.04263400  | -1.43559800 |
| H | -5.27938800 | -3.44868900 | 1.80855100  | C          | 3.97087100  | 4.82544300  | -0.50979600 |
| C | -3.29107400 | -4.24782300 | 1.90778800  | C          | 3.27504600  | 5.67507900  | 0.35148300  |
| H | -2.25662900 | -3.89515600 | 1.89724800  | H          | 1.32913400  | 6.38424700  | 0.95664700  |
| H | -3.43337700 | -4.91094400 | 1.04884000  | H          | 0.10806900  | 4.99409900  | -0.69228500 |

|   |             |             |             |                         |             |             |             |
|---|-------------|-------------|-------------|-------------------------|-------------|-------------|-------------|
| H | 3.81568900  | 3.35783900  | -2.08424900 | H                       | -3.90640700 | -3.59982100 | -0.89743300 |
| H | 5.05425000  | 4.76161800  | -0.45328200 | H                       | -1.31814800 | -3.27940900 | 2.52447600  |
| H | 3.81252000  | 6.27993300  | 1.07653200  | H                       | -3.04666400 | -4.53400100 | 1.24326300  |
| C | 1.12046800  | 3.27216800  | -2.54000200 | N                       | -3.17539000 | 1.35576900  | -1.01431000 |
| H | 0.45137900  | 3.92424600  | -3.11438200 | N                       | -3.64324900 | 0.87128000  | 0.06253800  |
| H | 1.83392500  | 2.82366600  | -3.23876300 | N                       | -4.97059400 | 0.86209900  | 0.18030600  |
| C | 0.31009900  | 2.17177400  | -1.90153600 | C                       | -5.42269600 | 0.56846700  | 1.55611300  |
| C | -1.05145500 | 2.22741200  | -1.76620200 | H                       | -6.51283200 | 0.63792600  | 1.53021900  |
| H | -1.61168400 | 3.08247400  | -2.13769700 | C                       | -5.03320900 | -0.86189000 | 1.94830700  |
| C | 1.04656000  | 1.01961200  | -1.40479500 | H                       | -3.94610700 | -0.96971600 | 1.95615300  |
| N | 0.29189400  | 0.01649200  | -0.81935900 | H                       | -5.43908300 | -1.58477200 | 1.23504300  |
| O | 2.28678700  | 0.90857400  | -1.53818900 | C                       | -4.88828400 | 1.59969500  | 2.56093600  |
| C | 1.58019100  | 0.35665000  | 2.11767000  | H                       | -3.79613000 | 1.55883200  | 2.59270900  |
| C | 2.68046600  | 1.27162200  | 2.70005700  | H                       | -5.18659800 | 2.61436000  | 2.28165300  |
| C | 3.04779900  | 2.24725400  | 1.55981100  | C                       | -5.83527700 | 1.47057100  | -0.84851900 |
| H | 3.86906200  | 2.90183100  | 1.87141900  | H                       | -5.29769700 | 1.29217600  | -1.78453400 |
| H | 3.34579000  | 1.70696000  | 0.65769700  | C                       | -7.19846800 | 0.77872200  | -0.93036700 |
| H | 2.19833600  | 2.88183700  | 1.29304500  | H                       | -7.08615800 | -0.30825300 | -0.98744400 |
| C | 3.92459400  | 0.46789400  | 3.11293800  | H                       | -7.72079200 | 1.11772200  | -1.83052500 |
| H | 4.67818800  | 1.13798000  | 3.54243300  | H                       | -7.84048000 | 1.01645400  | -0.07592700 |
| H | 3.67903400  | -0.29086300 | 3.86483900  | C                       | -5.95369900 | 2.98897100  | -0.65565300 |
| H | 4.36591500  | -0.03766400 | 2.25086100  | H                       | -4.95962200 | 3.44124700  | -0.62391000 |
| C | 2.12235900  | 2.04658400  | 3.90278600  | H                       | -6.51244600 | 3.43793100  | -1.48413200 |
| H | 2.86161300  | 2.77217700  | 4.26110100  | H                       | -6.48039900 | 3.22607100  | 0.27513600  |
| H | 1.21004800  | 2.57731600  | 3.62410400  | H                       | -5.27506300 | 1.38994400  | 3.56364400  |
| H | 1.87791700  | 1.37130200  | 4.73056400  | H                       | -5.41579500 | -1.09950800 | 2.94630100  |
| O | 2.05181200  | -0.68357300 | 1.47890800  | <b>TS11<sup>g</sup></b> |             |             |             |
| O | 0.38810400  | 0.64451300  | 2.22924000  | C                       | 3.31889100  | -0.79494500 | -2.11569500 |
| H | 2.26920600  | -0.72769900 | -3.18297600 | C                       | 3.98098100  | -1.07277600 | -0.84494500 |
| H | 2.45451400  | -2.27235200 | -4.05706300 | C                       | 3.41863300  | -2.25530800 | -0.31001000 |
| H | 0.84154800  | -1.67188100 | -3.62930800 | C                       | 2.40373500  | -2.73238300 | -1.22230900 |
| H | -0.12976100 | -4.94620200 | 0.56707400  | C                       | 2.38273100  | -1.84763200 | -2.36203800 |
| H | 1.28072600  | -5.97617500 | 0.27347500  | Rh                      | 1.71535100  | -0.69084600 | -0.58103800 |
| H | 1.24107600  | -4.90085700 | 1.68191200  | C                       | 3.74704400  | -2.90805300 | 1.00007500  |
| C | -1.77829100 | 1.19425800  | -1.12394200 | C                       | 5.08931500  | -0.25613900 | -0.25117400 |
| C | -1.05938200 | 0.08745200  | -0.68069300 | H                       | 6.06544800  | -0.58838700 | -0.62740100 |
| C | -1.67056500 | -1.14726100 | -0.12149100 | H                       | 4.98363600  | 0.80136200  | -0.50226300 |
| C | -2.65335400 | -1.85795300 | -0.83271100 | H                       | 5.10497800  | -0.33388800 | 0.83864600  |
| C | -1.18687500 | -1.67313100 | 1.09486700  | C                       | 3.68993900  | 0.30268600  | -3.06714800 |
| C | -3.14232400 | -3.06345200 | -0.34123300 | C                       | 1.55283100  | -2.04111100 | -3.59453600 |
| H | -3.03422700 | -1.44567400 | -1.76159700 | H                       | 1.39890600  | -1.09738900 | -4.12306900 |
| C | -1.68450000 | -2.89588700 | 1.57630500  | H                       | 2.04542100  | -2.73790500 | -4.28430100 |
| H | -0.55933900 | -1.03040100 | 1.71580000  | H                       | 0.56810800  | -2.44802500 | -3.35137200 |
| C | -2.65285200 | -3.59565000 | 0.86328600  | C                       | 1.65601700  | -4.02228500 | -1.08804200 |



|   |             |             |             |                       |             |             |             |
|---|-------------|-------------|-------------|-----------------------|-------------|-------------|-------------|
| H | 0.71018400  | -3.99967400 | -1.63190400 | H                     | 2.84663200  | 0.57757600  | -3.70508900 |
| H | 2.25173800  | -4.85888600 | -1.47718800 | C                     | -0.67129700 | 1.00044300  | -1.03046700 |
| H | 1.42649300  | -4.23777100 | -0.04093500 | C                     | -0.27900600 | -0.35994200 | -0.85313100 |
| C | 2.03343100  | 6.18329500  | -0.23728500 | C                     | -1.15394000 | -1.50223700 | -1.13938500 |
| C | 2.39925400  | 4.86386600  | -0.51737500 | C                     | -1.82950900 | -1.53354900 | -2.37763700 |
| C | 2.28100800  | 3.86282000  | 0.45461700  | C                     | -1.27351800 | -2.61423100 | -0.28770800 |
| C | 1.78033300  | 4.20633200  | 1.72026400  | C                     | -2.59774100 | -2.63680200 | -2.74223900 |
| C | 1.41751800  | 5.52305100  | 2.00083700  | H                     | -1.75420000 | -0.68033500 | -3.04352900 |
| C | 1.54211500  | 6.51669000  | 1.02496600  | C                     | -2.07029200 | -3.70032200 | -0.64483800 |
| H | 2.13343700  | 6.94667300  | -1.00431300 | H                     | -0.73675400 | -2.62404900 | 0.65008800  |
| H | 2.78482800  | 4.60921300  | -1.50254900 | C                     | -2.73342500 | -3.72320000 | -1.87403500 |
| H | 1.67391200  | 3.42473300  | 2.46604200  | H                     | -3.10401200 | -2.64012500 | -3.70349200 |
| H | 1.03389500  | 5.77541400  | 2.98584300  | H                     | -2.16184200 | -4.53946600 | 0.03952700  |
| H | 1.25687200  | 7.54124900  | 1.24739100  | H                     | -3.34671000 | -4.57497500 | -2.15239800 |
| C | 2.65315400  | 2.42549700  | 0.13527100  | N                     | -1.96747300 | 1.48425700  | -1.33200400 |
| H | 3.18324900  | 2.40493600  | -0.82318800 | N                     | -2.86894000 | 0.78956200  | -0.77114600 |
| H | 3.33545500  | 2.04070200  | 0.89796800  | N                     | -4.13119100 | 1.11489300  | -1.02932200 |
| C | 1.46003100  | 1.47658000  | 0.04699800  | C                     | -5.08404100 | 0.43555200  | -0.12358300 |
| C | 0.33033100  | 1.90550700  | -0.74256300 | H                     | -6.07395900 | 0.79677000  | -0.41326000 |
| H | 0.21383600  | 2.95895300  | -0.99497300 | C                     | -5.03215600 | -1.08077200 | -0.34776400 |
| C | 1.14647700  | 0.76503300  | 1.35253400  | H                     | -4.04413600 | -1.46916700 | -0.08964900 |
| N | 0.47465700  | -0.41186700 | 1.06314400  | H                     | -5.22849300 | -1.32778800 | -1.39493500 |
| O | 1.56712800  | 1.09553000  | 2.45921600  | C                     | -4.83058700 | 0.80219600  | 1.34660500  |
| C | -0.82899500 | -0.98759100 | 2.89861200  | H                     | -3.83667200 | 0.46967900  | 1.65843900  |
| C | -0.94828600 | -1.96701800 | 4.06815200  | H                     | -4.89319100 | 1.88366500  | 1.49942700  |
| C | -1.05353300 | -3.40245800 | 3.50682200  | C                     | -4.46552500 | 2.31221400  | -1.82378800 |
| H | -1.17724700 | -4.11250500 | 4.33124900  | H                     | -3.65731500 | 2.37766300  | -2.55812800 |
| H | -1.91692500 | -3.50259100 | 2.83998800  | C                     | -5.78915000 | 2.14677400  | -2.57466400 |
| H | -0.15339400 | -3.67579600 | 2.94964100  | H                     | -5.81910100 | 1.19700900  | -3.11724500 |
| C | -2.21390000 | -1.61244200 | 4.86210500  | H                     | -5.89693100 | 2.96010600  | -3.29925700 |
| H | -2.32452800 | -2.29846400 | 5.70811500  | H                     | -6.65567400 | 2.19179500  | -1.90695200 |
| H | -2.16089300 | -0.58998600 | 5.24468300  | C                     | -4.42917800 | 3.58383200  | -0.96397000 |
| H | -3.10524000 | -1.68374500 | 4.23289700  | H                     | -3.46724500 | 3.66632000  | -0.45239700 |
| C | 0.30547500  | -1.83575300 | 4.95982800  | H                     | -4.56565500 | 4.47229000  | -1.59014600 |
| H | 0.21340300  | -2.50264400 | 5.82385500  | H                     | -5.22779100 | 3.57189300  | -0.21457000 |
| H | 1.21101700  | -2.09752100 | 4.40780500  | H                     | -5.57859100 | 0.32325200  | 1.98786900  |
| H | 0.42008900  | -0.81066000 | 5.32465100  | H                     | -5.77974000 | -1.58067300 | 0.27702600  |
| O | -1.59818400 | -0.10390400 | 2.61972700  | <b>12<sup>a</sup></b> |             |             |             |
| O | 0.30804200  | -1.26994100 | 2.17109900  | C                     | 3.55806400  | -1.11908300 | -1.58263200 |
| H | 2.83484600  | -3.13243600 | 1.56152400  | C                     | 4.11400600  | -1.30400200 | -0.25246000 |
| H | 4.28307600  | -3.85208100 | 0.84229900  | C                     | 3.49373600  | -2.45116500 | 0.31682800  |
| H | 4.37180900  | -2.26712600 | 1.62532500  | C                     | 2.55149500  | -2.98084800 | -0.63100700 |
| H | 4.00892900  | 1.20194800  | -2.53447700 | C                     | 2.61835500  | -2.17535900 | -1.82093100 |
| H | 4.51900200  | -0.00497600 | -3.71782300 | Rh                    | 1.88101200  | -0.82290100 | -0.18703800 |

|   |             |             |             |   |             |             |             |
|---|-------------|-------------|-------------|---|-------------|-------------|-------------|
| C | 3.75120000  | -3.00767000 | 1.68541700  | C | -0.87295600 | 0.16665100  | 5.01957400  |
| C | 5.20857700  | -0.48182900 | 0.35975700  | H | -1.19985400 | -0.11382700 | 6.02637100  |
| H | 6.19705800  | -0.88409100 | 0.10152100  | H | 0.10592100  | -0.27817300 | 4.82646600  |
| H | 5.17253300  | 0.55248600  | 0.01032300  | H | -0.76075700 | 1.25404200  | 4.98095800  |
| H | 5.13211700  | -0.46157000 | 1.45002600  | O | -1.84638000 | 0.98588100  | 1.91177000  |
| C | 4.03552300  | -0.13421900 | -2.60736400 | O | -0.31490000 | -0.66377600 | 2.25121900  |
| C | 1.88881500  | -2.43992500 | -3.10072500 | H | 2.84085900  | -3.42924300 | 2.11992900  |
| H | 1.77253500  | -1.52621200 | -3.68891200 | H | 4.50114100  | -3.80825000 | 1.64816500  |
| H | 2.43571600  | -3.16765400 | -3.71445900 | H | 4.12035600  | -2.23776200 | 2.36732300  |
| H | 0.89221800  | -2.84564900 | -2.91184300 | H | 4.49207300  | 0.74126200  | -2.14170800 |
| C | 1.73522200  | -4.22658000 | -0.47110700 | H | 4.79325400  | -0.59251000 | -3.25604500 |
| H | 0.80418400  | -4.16929100 | -1.03833100 | H | 3.21597500  | 0.21280400  | -3.24178600 |
| H | 2.29192300  | -5.10604500 | -0.82090200 | C | -0.56971300 | 0.72818500  | -1.05923300 |
| H | 1.46574300  | -4.39838500 | 0.57382000  | C | -0.22935000 | -0.51930100 | -0.27141700 |
| C | 2.05487500  | 5.93413300  | -1.20041100 | C | -0.93959100 | -1.79530500 | -0.51119800 |
| C | 2.44128500  | 4.59223900  | -1.24401700 | C | -1.34558700 | -2.07597600 | -1.83418300 |
| C | 2.35834200  | 3.78133400  | -0.10523200 | C | -1.18592800 | -2.78042400 | 0.46400000  |
| C | 1.87547000  | 4.34288800  | 1.08691300  | C | -1.97750900 | -3.27089000 | -2.16096500 |
| C | 1.49072500  | 5.68254600  | 1.13213500  | H | -1.16482500 | -1.33875400 | -2.60796700 |
| C | 1.57826700  | 6.48375500  | -0.00990500 | C | -1.83464500 | -3.97172200 | 0.13368200  |
| H | 2.12716600  | 6.54708600  | -2.09491000 | H | -0.86344900 | -2.62564000 | 1.48232900  |
| H | 2.81262700  | 4.16804800  | -2.17454400 | C | -2.23786500 | -4.22899200 | -1.17586100 |
| H | 1.79374200  | 3.71302000  | 1.96696800  | H | -2.27533700 | -3.45115800 | -3.19028400 |
| H | 1.11928000  | 6.10327500  | 2.06282100  | H | -2.01600700 | -4.70658800 | 0.91349400  |
| H | 1.27670600  | 7.52687100  | 0.02877100  | H | -2.74163900 | -5.15728600 | -1.42778300 |
| C | 2.74947500  | 2.31482600  | -0.17106900 | N | -1.81765600 | 1.02465800  | -1.61872100 |
| H | 3.31021300  | 2.14357900  | -1.09491100 | N | -2.76826800 | 0.38236900  | -1.07004100 |
| H | 3.41071000  | 2.06722000  | 0.66522200  | N | -3.98612900 | 0.57958800  | -1.57354800 |
| C | 1.56389100  | 1.35691500  | -0.14042900 | C | -5.05070400 | 0.03685400  | -0.70426000 |
| C | 0.42206800  | 1.64048700  | -1.05147900 | H | -5.98094500 | 0.14818300  | -1.26635600 |
| H | 0.30718900  | 2.62073700  | -1.50472600 | C | -4.82181100 | -1.45865000 | -0.44910500 |
| C | 1.09693200  | 0.99260900  | 1.21645800  | H | -3.90659000 | -1.61894200 | 0.12458700  |
| N | 0.28267500  | -0.21393200 | 1.05237100  | H | -4.72235100 | -2.00441300 | -1.39098700 |
| O | 1.39286100  | 1.39532200  | 2.32866800  | C | -5.16227200 | 0.82379100  | 0.61180600  |
| C | -1.41346500 | 0.10811200  | 2.61052300  | H | -4.20514600 | 0.80087000  | 1.13962200  |
| C | -1.91763900 | -0.31758200 | 3.98646300  | H | -5.42378200 | 1.87029900  | 0.43246000  |
| C | -2.06569200 | -1.85176500 | 4.05525100  | C | -4.21707900 | 1.58839100  | -2.62682200 |
| H | -2.49165600 | -2.13128500 | 5.02418800  | H | -3.33337500 | 1.50778400  | -3.26712300 |
| H | -2.73258700 | -2.22225000 | 3.26984700  | C | -5.45436400 | 1.26319300  | -3.46646200 |
| H | -1.09979300 | -2.35173100 | 3.95031700  | H | -5.44577600 | 0.22070200  | -3.79932200 |
| C | -3.27358600 | 0.36132600  | 4.23189400  | H | -5.46577700 | 1.90571800  | -4.35245100 |
| H | -3.62821200 | 0.11830400  | 5.23842500  | H | -6.38668400 | 1.44691100  | -2.92223300 |
| H | -3.19031800 | 1.44662800  | 4.13987600  | C | -4.25327100 | 3.01584400  | -2.05978700 |
| H | -4.02176500 | 0.02166000  | 3.50977300  | H | -3.36684500 | 3.20383500  | -1.45032200 |

|              |             |             |             |   |             |             |             |
|--------------|-------------|-------------|-------------|---|-------------|-------------|-------------|
| H            | -4.27233000 | 3.74572600  | -2.87658600 | O | 2.63538200  | 0.48217800  | -2.66833000 |
| H            | -5.14636600 | 3.17294800  | -1.44634000 | C | 0.65415300  | 3.02329500  | -0.69593000 |
| H            | -5.93497300 | 0.38576000  | 1.25344700  | C | 0.56049500  | 4.42844000  | -1.27321800 |
| H            | -5.66643500 | -1.87344400 | 0.11097600  | C | 1.92650900  | 4.78221100  | -1.90354400 |
| <b>TS12b</b> |             |             |             |   |             |             |             |
| C            | 0.25600600  | -0.54355700 | 2.77277700  | H | 1.87208200  | 5.77992500  | -2.35059100 |
| C            | 1.30808900  | -1.18216400 | 2.02533200  | H | 2.71852400  | 4.79105500  | -1.14719800 |
| C            | 2.51802400  | -0.35655100 | 2.13249300  | H | 2.20051400  | 4.06153600  | -2.67772900 |
| C            | 2.17513100  | 0.82068900  | 2.79899900  | C | 0.20556200  | 5.40914600  | -0.14637000 |
| C            | 0.74275300  | 0.74226400  | 3.13635800  | H | 0.13766000  | 6.42192400  | -0.55503700 |
| Rh           | 0.71925700  | 0.64022800  | 0.94645700  | H | -0.75488600 | 5.15017200  | 0.30720400  |
| C            | 3.82949800  | -0.73997600 | 1.52661300  | H | 0.96504100  | 5.40222000  | 0.64018500  |
| C            | 1.28413400  | -2.59720600 | 1.54120600  | C | -0.54498200 | 4.43375900  | -2.35366100 |
| H            | 1.55053600  | -3.27873000 | 2.36021000  | H | -0.63115300 | 5.44132200  | -2.77338400 |
| H            | 0.29181000  | -2.87173600 | 1.17719100  | H | -0.30844700 | 3.73769300  | -3.16142900 |
| H            | 1.99544700  | -2.74984400 | 0.72916000  | H | -1.51245100 | 4.15075500  | -1.92971100 |
| C            | -1.10054100 | -1.12727800 | 3.02839200  | O | 0.48132700  | 2.75498600  | 0.50114100  |
| C            | 0.00855000  | 1.81511100  | 3.88377400  | O | 0.93114400  | 2.11033000  | -1.60553600 |
| H            | -1.07082500 | 1.64810600  | 3.86737900  | H | 4.56935400  | 0.05822200  | 1.61413100  |
| H            | 0.32979600  | 1.84808500  | 4.93254000  | H | 4.23617800  | -1.63849800 | 2.00391600  |
| H            | 0.20444900  | 2.79793200  | 3.44463700  | H | 3.71308700  | -0.97503400 | 0.46542800  |
| C            | 3.03547600  | 2.01209200  | 3.09431400  | H | -1.52028100 | -1.55131500 | 2.11321400  |
| H            | 2.57103900  | 2.93136800  | 2.72110300  | H | -1.04557500 | -1.92014700 | 3.78516400  |
| H            | 3.18469900  | 2.13608700  | 4.17425800  | H | -1.80226700 | -0.37040700 | 3.38757100  |
| H            | 4.01854800  | 1.92217000  | 2.62680300  | C | -0.84153300 | -1.22696400 | -0.86613000 |
| C            | 5.92906800  | -1.92770200 | -1.14655000 | C | -0.75806800 | 0.10758100  | -0.38786500 |
| C            | 4.77933000  | -1.71332900 | -1.90882100 | C | -1.86645000 | 1.06177900  | -0.63797800 |
| C            | 3.69834600  | -2.60456300 | -1.83428100 | C | -2.34949000 | 1.93726900  | 0.34987600  |
| C            | 3.80142000  | -3.71421900 | -0.98430000 | C | -2.43288100 | 1.13261100  | -1.92526000 |
| C            | 4.94858800  | -3.92751900 | -0.21709100 | C | -3.38472400 | 2.82763400  | 0.07262200  |
| C            | 6.01792100  | -3.03276200 | -0.29586100 | H | -1.90723000 | 1.90305600  | 1.33926500  |
| H            | 6.75742400  | -1.22752200 | -1.21528400 | C | -3.46772100 | 2.02207400  | -2.20405600 |
| H            | 4.68970100  | -0.84117700 | -2.54791600 | H | -2.05472400 | 0.46843300  | -2.69618700 |
| H            | 2.97376900  | -4.41767100 | -0.92579800 | C | -3.95095700 | 2.87324000  | -1.20516100 |
| H            | 5.00897600  | -4.79410000 | 0.43604500  | H | -3.75422200 | 3.48420000  | 0.85557900  |
| H            | 6.91359400  | -3.19752300 | 0.29672200  | H | -3.89309200 | 2.05852700  | -3.20313100 |
| C            | 2.42889200  | -2.35234100 | -2.63062100 | H | -4.75505900 | 3.57061600  | -1.42240100 |
| H            | 2.69516100  | -1.88275800 | -3.58387700 | N | -2.07177100 | -1.91476200 | -0.92492700 |
| H            | 1.94294600  | -3.30909200 | -2.85082300 | N | -2.91638200 | -1.52028200 | -0.05720200 |
| C            | 1.44329000  | -1.44836300 | -1.91295000 | N | -4.16168800 | -1.99135500 | -0.20889200 |
| C            | 0.24096200  | -1.93770000 | -1.44562800 | C | -5.03296000 | -1.75012000 | 0.95264300  |
| H            | 0.02780100  | -2.98665300 | -1.64409700 | H | -6.04300000 | -2.00680000 | 0.62508900  |
| C            | 1.76771200  | -0.03407400 | -1.95238700 | C | -4.66803100 | -2.64598900 | 2.14756300  |
| N            | 0.92821600  | 0.73877700  | -1.12172900 | H | -3.65081000 | -2.42614100 | 2.48295200  |
|              |             |             |             | H | -4.71958800 | -3.70580200 | 1.88392200  |

|            |             |             |             |   |             |             |             |
|------------|-------------|-------------|-------------|---|-------------|-------------|-------------|
| C          | -5.02317600 | -0.26509800 | 1.33818000  | H | 2.81139400  | -4.17055200 | -1.60052500 |
| H          | -4.03961900 | 0.03215900  | 1.70652900  | H | 4.55484900  | -5.00149000 | -0.04876700 |
| H          | -5.25349500 | 0.36271800  | 0.47348800  | H | 6.55884400  | -3.60639000 | 0.43574200  |
| C          | -4.48691000 | -2.92847700 | -1.30006800 | C | 2.71008000  | -1.77601300 | -2.91576100 |
| H          | -3.86354400 | -2.58439600 | -2.13190800 | H | 3.15973400  | -1.10133300 | -3.65276500 |
| C          | -4.06434500 | -4.36924000 | -0.97367400 | H | 2.26663000  | -2.61244600 | -3.46827000 |
| H          | -3.01404600 | -4.39318900 | -0.67564900 | C | 1.61059400  | -1.04044400 | -2.17442600 |
| H          | -4.18827300 | -5.00910500 | -1.85440400 | C | 0.36072700  | -1.62779500 | -1.92200700 |
| H          | -4.67489300 | -4.78691300 | -0.16614000 | H | 0.18679500  | -2.64289400 | -2.27134000 |
| C          | -5.95551300 | -2.83690600 | -1.72158100 | C | 1.90073200  | 0.26726600  | -1.74613600 |
| H          | -6.25826600 | -1.79767600 | -1.88227400 | N | 0.76556800  | 0.88808200  | -0.98068700 |
| H          | -6.09127900 | -3.38112700 | -2.66142200 | O | 2.91633600  | 0.95302200  | -1.87748200 |
| H          | -6.63121800 | -3.28838600 | -0.98732600 | C | 0.59688000  | 3.13273900  | -0.28717500 |
| H          | -5.76519400 | -0.07858300 | 2.12161900  | C | 0.69762300  | 4.58887200  | -0.70810300 |
| H          | -5.35249600 | -2.46742900 | 2.98393400  | C | 2.17624100  | 4.84685800  | -1.08706600 |
| <b>13b</b> |             |             |             | H | 2.28157200  | 5.87506000  | -1.44726300 |
| C          | -0.09922900 | -0.91348800 | 2.63892300  | H | 2.83146200  | 4.71899900  | -0.21930900 |
| C          | 0.99471300  | -1.42393000 | 1.85450600  | H | 2.50742600  | 4.15818900  | -1.86817500 |
| C          | 2.20108500  | -0.64652400 | 2.17297600  | C | 0.26822700  | 5.47824000  | 0.46751100  |
| C          | 1.81679800  | 0.40947800  | 3.00239600  | H | 0.36925600  | 6.52946400  | 0.18154600  |
| C          | 0.36525900  | 0.29034100  | 3.23714700  | H | -0.77473400 | 5.29096400  | 0.73866000  |
| Rh         | 0.50713300  | 0.56096200  | 1.07186000  | H | 0.88640400  | 5.29665100  | 1.35033400  |
| C          | 3.54426300  | -0.92678500 | 1.57729900  | C | -0.22044200 | 4.82756000  | -1.92775400 |
| C          | 1.00406800  | -2.72184800 | 1.11000800  | H | -0.17262600 | 5.88454600  | -2.20797700 |
| H          | 1.22794300  | -3.54664800 | 1.79940800  | H | 0.09304200  | 4.22575800  | -2.78305100 |
| H          | 0.03838200  | -2.91788200 | 0.63992000  | H | -1.25911900 | 4.57484200  | -1.69593600 |
| H          | 1.76509600  | -2.72179100 | 0.32842200  | O | 0.38765100  | 2.73999500  | 0.86045200  |
| C          | -1.45450400 | -1.53693800 | 2.77025300  | O | 0.77177700  | 2.30254400  | -1.31468900 |
| C          | -0.41637600 | 1.20811800  | 4.12919100  | H | 4.30486600  | -0.23675300 | 1.94848300  |
| H          | -1.49046000 | 1.12012500  | 3.94878900  | H | 3.87105500  | -1.94854200 | 1.79763000  |
| H          | -0.23097600 | 0.97358300  | 5.18552600  | H | 3.51616600  | -0.83617900 | 0.48768800  |
| H          | -0.13152500 | 2.25166300  | 3.96792400  | H | -1.74989000 | -2.02954200 | 1.84305300  |
| C          | 2.66079500  | 1.52657000  | 3.53746200  | H | -1.46307100 | -2.28344300 | 3.57626700  |
| H          | 2.20064600  | 2.49772200  | 3.32666400  | H | -2.21765600 | -0.78915100 | 2.99926100  |
| H          | 2.78000400  | 1.44986300  | 4.62566200  | C | -0.70206500 | -1.02963200 | -1.26371000 |
| H          | 3.65525100  | 1.52633400  | 3.08605200  | C | -0.57982000 | 0.34235800  | -0.76611200 |
| C          | 5.92139800  | -1.99153200 | -0.84863500 | C | -1.71590200 | 1.29068600  | -1.07044100 |
| C          | 4.93534700  | -1.52330400 | -1.71911500 | C | -2.37010900 | 2.04082700  | -0.08879700 |
| C          | 3.80276700  | -2.30078900 | -1.99935800 | C | -2.10043100 | 1.44768400  | -2.41018700 |
| C          | 3.68337400  | -3.55605600 | -1.38757100 | C | -3.38005000 | 2.93975000  | -0.43585600 |
| C          | 4.66491000  | -4.02447000 | -0.51203400 | H | -2.08419600 | 1.90449500  | 0.94791200  |
| C          | 5.79034500  | -3.24260400 | -0.24073300 | C | -3.11146200 | 2.34168200  | -2.76016200 |
| H          | 6.79263700  | -1.37565400 | -0.64169900 | H | -1.60047100 | 0.85749500  | -3.17277000 |
| H          | 5.01303100  | -0.53664600 | -2.16402600 | C | -3.75309000 | 3.09499500  | -1.77298500 |

|              |             |             |             |   |             |             |             |
|--------------|-------------|-------------|-------------|---|-------------|-------------|-------------|
| H            | -3.88373500 | 3.50868500  | 0.34072400  | H | 0.19384000  | -4.83589000 | -1.25671100 |
| H            | -3.39725100 | 2.45246600  | -3.80239600 | H | -0.25013400 | -5.27885800 | -2.91018700 |
| H            | -4.54010700 | 3.79325400  | -2.04362500 | H | 1.35342500  | -4.60283000 | -2.56735300 |
| N            | -1.85140300 | -1.80636600 | -1.13647000 | C | 4.98011100  | 5.00467800  | -0.02988300 |
| N            | -2.79122300 | -1.32328700 | -0.42780800 | C | 4.11224400  | 4.31856500  | -0.88354600 |
| N            | -3.91917800 | -2.06848200 | -0.41550400 | C | 4.12423900  | 2.92081900  | -0.94632400 |
| C            | -4.98225800 | -1.61393400 | 0.49092900  | C | 5.02481100  | 2.21511300  | -0.13285500 |
| H            | -5.92863300 | -1.78841800 | -0.03323700 | C | 5.89087500  | 2.89891000  | 0.71936500  |
| C            | -5.02519100 | -2.40993900 | 1.80829100  | C | 5.87283200  | 4.29608500  | 0.77470000  |
| H            | -4.08479400 | -2.29762300 | 2.35398000  | H | 4.95814500  | 6.09083900  | 0.00436400  |
| H            | -5.19344000 | -3.47562100 | 1.63371200  | H | 3.41771700  | 4.87546200  | -1.50876400 |
| C            | -4.88828500 | -0.11048800 | 0.76182400  | H | 5.02320400  | 1.12958500  | -0.17342300 |
| H            | -4.00445700 | 0.13411400  | 1.35358500  | H | 6.58458800  | 2.34038600  | 1.34254500  |
| H            | -4.82517000 | 0.45720900  | -0.16810100 | H | 6.55016300  | 4.82643000  | 1.43857600  |
| C            | -3.96899600 | -3.35778400 | -1.12709500 | C | 3.15509300  | 2.16708200  | -1.84229900 |
| H            | -3.41786700 | -3.17771900 | -2.05634200 | H | 2.72085600  | 2.85658100  | -2.57534200 |
| C            | -3.22239700 | -4.47039700 | -0.36905400 | H | 3.70070600  | 1.39426400  | -2.39475200 |
| H            | -2.20855400 | -4.14564800 | -0.12691500 | C | 2.04916400  | 1.49751900  | -1.05057800 |
| H            | -3.15252300 | -5.36841200 | -0.99315100 | C | 0.82353500  | 2.14016500  | -0.81531100 |
| H            | -3.73801200 | -4.74108300 | 0.55698400  | H | 0.68878000  | 3.15528500  | -1.18063100 |
| C            | -5.39740700 | -3.77190900 | -1.48901600 | C | 2.29772700  | 0.18087000  | -0.60174600 |
| H            | -5.91435400 | -2.98544400 | -2.04734700 | N | 1.14221500  | -0.40835200 | 0.07338600  |
| H            | -5.35615100 | -4.66312200 | -2.12294800 | O | 3.29206800  | -0.53933700 | -0.77663900 |
| H            | -5.99719500 | -4.02637700 | -0.60899900 | C | 1.13751700  | -2.40286100 | 1.52916600  |
| H            | -5.77942900 | 0.20693500  | 1.31357400  | C | 1.69216100  | -3.25294900 | 2.67649900  |
| H            | -5.83882600 | -2.04357400 | 2.44419700  | C | 3.05145900  | -3.81303700 | 2.19901100  |
| <b>TS14b</b> |             |             |             | H | 3.49798600  | -4.41463600 | 2.99738500  |
| C            | -1.77798300 | -1.38375900 | -2.47906000 | H | 2.92596200  | -4.45221000 | 1.31875900  |
| C            | -0.49833400 | -0.91032800 | -2.96319300 | H | 3.73840800  | -3.00351600 | 1.93973900  |
| C            | 0.40676100  | -2.05169900 | -3.08267600 | C | 0.70808000  | -4.39187600 | 2.98107300  |
| C            | -0.24469300 | -3.16032100 | -2.52040400 | H | 1.10787900  | -5.00951800 | 3.79151800  |
| C            | -1.59351300 | -2.73810700 | -2.10425600 | H | -0.26229200 | -3.99477300 | 3.29251700  |
| Rh           | -0.20281300 | -1.51703000 | -0.89044400 | H | 0.54973400  | -5.02496300 | 2.10478400  |
| C            | 1.80790700  | -1.95984700 | -3.60892100 | C | 1.88429100  | -2.36284100 | 3.92183000  |
| C            | -0.23096200 | 0.45071700  | -3.52618900 | H | 2.26408800  | -2.97341800 | 4.74743200  |
| H            | -0.49016900 | 0.48009800  | -4.59239300 | H | 2.59678400  | -1.55866800 | 3.72601500  |
| H            | -0.81469700 | 1.21416600  | -3.00768200 | H | 0.93814900  | -1.90941800 | 4.23149200  |
| H            | 0.82271800  | 0.71669400  | -3.42063400 | O | 0.17756300  | -2.78349300 | 0.83013900  |
| C            | -3.01412000 | -0.54624800 | -2.36174400 | O | 1.76765100  | -1.27758900 | 1.36280700  |
| C            | -2.60537400 | -3.66295200 | -1.49624600 | H | 2.28034500  | -2.94335500 | -3.65663900 |
| H            | -3.42896100 | -3.10890000 | -1.04016100 | H | 1.81343600  | -1.53217100 | -4.61827300 |
| H            | -3.02724500 | -4.33729300 | -2.25246400 | H | 2.43133500  | -1.32694600 | -2.96758100 |
| H            | -2.14620100 | -4.28071600 | -0.71898400 | H | -2.78681600 | 0.41546700  | -1.89664100 |
| C            | 0.29468700  | -4.54228500 | -2.30698600 | H | -3.45144700 | -0.35813300 | -3.35095100 |

|            |             |             |             |   |             |             |             |
|------------|-------------|-------------|-------------|---|-------------|-------------|-------------|
| H          | -3.77349700 | -1.03635500 | -1.74847200 | C | 4.70893700  | -0.73335800 | -1.35423900 |
| C          | -0.25567300 | 1.56760000  | -0.16497300 | C | 2.55315400  | -2.12156900 | -3.21549000 |
| C          | -0.11813900 | 0.22245000  | 0.39652800  | H | 3.26906300  | -2.71271700 | -3.80077700 |
| C          | -0.60926700 | 0.05672700  | 1.81758500  | H | 1.54547200  | -2.39477600 | -3.53529100 |
| C          | -1.59443100 | -0.85827600 | 2.19732400  | H | 2.68985800  | -1.06012400 | -3.42208200 |
| C          | -0.01847700 | 0.86463800  | 2.80036600  | C | 1.00962300  | -4.32316400 | -1.46374100 |
| C          | -1.97911800 | -0.97174200 | 3.53470000  | C | 2.01306200  | -4.09450700 | 1.53150500  |
| H          | -2.05558500 | -1.48052900 | 1.44006300  | H | 0.92030700  | -4.12246100 | 1.49932500  |
| C          | -0.40172500 | 0.75428500  | 4.13642900  | H | 2.38624200  | -5.12512600 | 1.49014800  |
| H          | 0.74583900  | 1.57830700  | 2.50743700  | H | 2.30646200  | -3.66066700 | 2.48856200  |
| C          | -1.38389200 | -0.16700000 | 4.50898400  | C | 4.47974500  | -1.98314900 | 1.58908900  |
| H          | -2.74976800 | -1.68565700 | 3.81200200  | H | 4.02813000  | -2.32442300 | 2.52256500  |
| H          | 0.06867700  | 1.38467100  | 4.88560100  | H | 5.48046400  | -2.42398300 | 1.51170300  |
| H          | -1.68364100 | -0.25595700 | 5.54938700  | H | 4.58365900  | -0.89657400 | 1.65019200  |
| N          | -1.39099700 | 2.36379200  | -0.00917200 | C | 1.64682000  | 5.88413500  | 0.17103200  |
| N          | -2.45787500 | 1.74194900  | 0.30038300  | C | 1.00833700  | 5.22265700  | -0.88042500 |
| N          | -3.52158300 | 2.53136700  | 0.53353700  | C | 1.56328100  | 4.06874500  | -1.44814100 |
| C          | -4.81173600 | 1.83467700  | 0.65627500  | C | 2.77781600  | 3.58559800  | -0.93762300 |
| H          | -5.40577400 | 2.41823600  | 1.36651900  | C | 3.41851300  | 4.24859700  | 0.10920100  |
| C          | -5.58032600 | 1.78260900  | -0.67633700 | C | 2.85658200  | 5.39872000  | 0.67003700  |
| H          | -4.98550000 | 1.27179500  | -1.43860600 | H | 1.19892200  | 6.77729800  | 0.59868900  |
| H          | -5.82097700 | 2.78303500  | -1.04450400 | H | 0.06316100  | 5.60297600  | -1.26130300 |
| C          | -4.64295500 | 0.43432600  | 1.25238400  | H | 3.18717100  | 2.66954500  | -1.34808400 |
| H          | -4.11888000 | -0.23164200 | 0.56459200  | H | 4.35842900  | 3.86052300  | 0.49313000  |
| H          | -4.06866400 | 0.46880300  | 2.17989400  | H | 3.35602000  | 5.91004100  | 1.48838000  |
| C          | -3.41075800 | 3.99621800  | 0.38935200  | C | 0.82504100  | 3.30671900  | -2.53864100 |
| H          | -2.43423000 | 4.23385200  | 0.82526600  | H | 0.10230800  | 3.97024600  | -3.02578800 |
| C          | -3.36992700 | 4.44776300  | -1.08145700 | H | 1.53487100  | 2.95713700  | -3.29363900 |
| H          | -2.60235800 | 3.89487100  | -1.62520200 | C | 0.10782000  | 2.10956500  | -1.95380100 |
| H          | -3.12545400 | 5.51448000  | -1.13499100 | C | -1.17769900 | 2.17146400  | -1.49323100 |
| H          | -4.33438800 | 4.29863500  | -1.57555300 | H | -1.76744700 | 3.07789100  | -1.60956800 |
| C          | -4.48971600 | 4.73752000  | 1.18179700  | C | 0.87439900  | 0.88964700  | -1.77686900 |
| H          | -4.51145600 | 4.41870800  | 2.22833300  | N | 0.29020500  | -0.12740200 | -1.02352400 |
| H          | -4.26927800 | 5.80918800  | 1.15991300  | O | 2.03866000  | 0.76595100  | -2.22730000 |
| H          | -5.48868100 | 4.60251000  | 0.75349000  | C | 1.48859300  | 0.42056500  | 1.77792000  |
| H          | -5.63307400 | 0.01599800  | 1.46138800  | C | 1.16230600  | 1.55116600  | 2.74364100  |
| H          | -6.52182700 | 1.23714900  | -0.54984800 | C | 2.47502300  | 2.21560900  | 3.20054400  |
| <b>15b</b> |             |             |             | H | 2.25216800  | 3.06189700  | 3.85904700  |
| C          | 2.00151800  | -3.32718400 | -0.95394600 | H | 3.10360600  | 1.50977300  | 3.75574200  |
| C          | 2.74382100  | -2.38708700 | -1.75612300 | H | 3.03794500  | 2.58525000  | 2.34172000  |
| C          | 3.74588900  | -1.79027800 | -0.92112400 | C | 0.37445900  | 1.01503800  | 3.94780900  |
| C          | 3.63203800  | -2.35978100 | 0.41222900  | H | 0.11202900  | 1.84163200  | 4.61676400  |
| C          | 2.55098000  | -3.30099700 | 0.38193600  | H | -0.54325800 | 0.51788700  | 3.62629200  |
| Rh         | 1.81429900  | -1.30141700 | -0.08094300 | H | 0.96360100  | 0.28764100  | 4.51570600  |

|   |             |             |             |              |             |             |             |
|---|-------------|-------------|-------------|--------------|-------------|-------------|-------------|
| C | 0.31307600  | 2.57150500  | 1.94690600  | H            | -6.81009200 | 1.99342500  | 2.21347500  |
| H | 0.05329000  | 3.41660000  | 2.59322800  | H            | -7.57438200 | 0.76574800  | 1.20707100  |
| H | 0.86710100  | 2.95100700  | 1.08653900  | H            | -6.11883600 | -2.99449000 | -0.53819500 |
| H | -0.61306700 | 2.11732100  | 1.58127700  | H            | -6.80892300 | -1.54717000 | -2.54617500 |
| O | 0.89369300  | -0.70485000 | 1.83199300  | <b>TS12a</b> |             |             |             |
| O | 2.32772400  | 0.60570500  | 0.83536800  | Rh           | -1.38841300 | -1.02122500 | -0.66984900 |
| H | 5.21502100  | -0.28347800 | -0.49863900 | N            | -0.47501300 | -2.32677700 | 0.32449900  |
| H | 5.46730600  | -1.16502200 | -2.01886300 | C            | -1.68655200 | -2.43017300 | -2.54731100 |
| H | 4.16505700  | 0.04810500  | -1.89019500 | C            | -0.77390000 | -1.32171000 | -2.78108800 |
| H | 0.44230100  | -3.93104500 | -2.30953200 | C            | -1.54149600 | -0.09211300 | -2.75513300 |
| H | 1.53984500  | -5.22086800 | -1.80757500 | C            | -2.86223600 | -0.43541400 | -2.36979400 |
| H | 0.30628900  | -4.62222000 | -0.68706100 | C            | -2.95004900 | -1.88727000 | -2.24251300 |
| C | -1.79151000 | 1.06465400  | -0.85883300 | O            | -1.70122000 | -1.16796100 | 2.45463400  |
| C | -1.00737100 | -0.05988300 | -0.59513900 | C            | 0.60845800  | -2.46065100 | 1.09733900  |
| C | -1.53653300 | -1.21054400 | 0.18994900  | C            | 1.74801800  | -2.22521700 | 0.12567800  |
| C | -1.52583200 | -2.50172800 | -0.34513100 | C            | 2.03241200  | -0.97026100 | -0.30201400 |
| C | -2.05123400 | -1.02308000 | 1.48134500  | O            | 0.78227400  | -2.88575200 | 2.23047500  |
| C | -2.00162300 | -3.58748200 | 0.39513300  | C            | -0.09302300 | 0.38566100  | 0.05211800  |
| H | -1.16051100 | -2.64047300 | -1.35558900 | C            | 1.26695900  | 0.24837100  | -0.09856000 |
| C | -2.52125100 | -2.10179200 | 2.22394200  | C            | -2.68927000 | -0.65903100 | 1.93527600  |
| H | -2.08244400 | -0.02045700 | 1.89319600  | O            | -2.86960400 | -0.47232600 | 0.65414300  |
| C | -2.49248000 | -3.39306000 | 1.68727200  | C            | -3.87523400 | -0.19112100 | 2.82148200  |
| H | -2.00925200 | -4.58118200 | -0.04568100 | C            | 0.63944200  | -1.43840500 | -3.25817500 |
| H | -2.90589900 | -1.93762600 | 3.22668900  | H            | 0.67338300  | -1.47529900 | -4.35498300 |
| H | -2.86493900 | -4.23474200 | 2.26430300  | H            | 1.11493000  | -2.34221600 | -2.87216700 |
| N | -3.14117600 | 1.23079100  | -0.46826900 | H            | 1.23289500  | -0.58221300 | -2.92957100 |
| N | -3.85581600 | 0.20188100  | -0.66459700 | C            | -1.26997400 | -3.86609000 | -2.50573300 |
| N | -5.09504800 | 0.24800400  | -0.16931200 | H            | -0.62290600 | -4.04299700 | -1.63738300 |
| C | -5.96512400 | -0.83177100 | -0.67169100 | H            | -0.71306600 | -4.13750100 | -3.40851700 |
| H | -6.94330000 | -0.65796600 | -0.21647800 | H            | -2.13127300 | -4.53181200 | -2.42255600 |
| C | -6.12186500 | -0.76841900 | -2.19859600 | C            | -4.19505900 | -2.59633500 | -1.80710600 |
| H | -5.15098500 | -0.92027100 | -2.67822800 | H            | -4.02421500 | -3.66521900 | -1.66633600 |
| H | -6.51203500 | 0.20313900  | -2.51561200 | H            | -5.00109600 | -2.47072500 | -2.54004300 |
| C | -5.44504300 | -2.19704200 | -0.20711700 | H            | -4.54060800 | -2.18005100 | -0.85447000 |
| H | -4.45007200 | -2.38310800 | -0.61719700 | C            | -4.02743700 | 0.47462600  | -2.13385800 |
| H | -5.36506800 | -2.23303000 | 0.88251400  | H            | -4.30536300 | 0.45587000  | -1.07367900 |
| C | -5.60778700 | 1.45328700  | 0.50709200  | H            | -4.89382300 | 0.14451300  | -2.71736100 |
| H | -4.72024600 | 1.89095500  | 0.97328200  | H            | -3.80406500 | 1.50569400  | -2.41607900 |
| C | -6.16134500 | 2.47053300  | -0.50005200 | C            | -0.99799300 | 1.25347100  | -3.13689000 |
| H | -5.40199400 | 2.70353400  | -1.25054700 | H            | -1.73432300 | 2.04465700  | -2.98267300 |
| H | -6.44411400 | 3.39951400  | 0.00714200  | H            | -0.71980200 | 1.25721200  | -4.19781300 |
| H | -7.05044300 | 2.07730800  | -1.00552100 | H            | -0.10975000 | 1.50689500  | -2.55007800 |
| C | -6.61281000 | 1.10303800  | 1.60808000  | C            | -4.50119600 | -1.46524400 | 3.42401800  |
| H | -6.21796100 | 0.32181200  | 2.26457800  | H            | -5.31294000 | -1.19884500 | 4.11066600  |

|   |             |             |             |            |             |             |             |
|---|-------------|-------------|-------------|------------|-------------|-------------|-------------|
| H | -3.74778300 | -2.03672500 | 3.97185200  | H          | 3.01633800  | -0.81701000 | -0.74542300 |
| H | -4.91740400 | -2.10774300 | 2.63961500  | C          | 2.63640400  | -3.42285900 | -0.15555200 |
| C | -3.29429500 | 0.68935400  | 3.94427500  | H          | 2.73815300  | -3.56836300 | -1.23751100 |
| H | -4.08828800 | 0.97988200  | 4.64211700  | H          | 2.15318000  | -4.31843900 | 0.24791600  |
| H | -2.84618700 | 1.59931500  | 3.53456900  | C          | 4.01045900  | -3.26168400 | 0.47439900  |
| H | -2.52077200 | 0.14575200  | 4.49102800  | C          | 4.12349500  | -3.11787100 | 1.86556400  |
| C | -4.92334400 | 0.59528200  | 2.02286800  | C          | 5.16689000  | -3.23825300 | -0.31082000 |
| H | -5.72375500 | 0.93426900  | 2.69086100  | C          | 5.37728700  | -2.96478000 | 2.45372000  |
| H | -5.36974300 | -0.02217900 | 1.23817800  | H          | 3.21702200  | -3.11346300 | 2.46606900  |
| H | -4.47359400 | 1.47192900  | 1.54845400  | C          | 6.42431500  | -3.08327900 | 0.28031400  |
| C | -0.66966400 | 1.57117600  | 0.71098100  | H          | 5.08629900  | -3.34657900 | -1.39014100 |
| C | -0.10916100 | 2.02570000  | 1.92374400  | C          | 6.53194700  | -2.94741800 | 1.66410900  |
| C | -1.79993000 | 2.24854000  | 0.22073400  | H          | 5.45507500  | -2.85607700 | 3.53201800  |
| C | -0.62909500 | 3.13494100  | 2.58557800  | H          | 7.31543600  | -3.06910200 | -0.34139900 |
| H | 0.73983000  | 1.49269000  | 2.33731300  | H          | 7.50774000  | -2.82631700 | 2.12623900  |
| C | -2.31772900 | 3.36222100  | 0.87813900  | <b>13a</b> |             |             |             |
| H | -2.27203400 | 1.89655300  | -0.68474500 | Rh         | -1.38072800 | -1.03724300 | -0.68473800 |
| C | -1.73207600 | 3.81734000  | 2.06165700  | N          | -0.42063600 | -2.38870300 | 0.19005100  |
| H | -0.18185800 | 3.45873000  | 3.52122100  | C          | -1.68338200 | -2.35159400 | -2.62918000 |
| H | -3.18347700 | 3.87355000  | 0.46646700  | C          | -0.80894100 | -1.20635400 | -2.82075200 |
| H | -2.13908400 | 4.68126300  | 2.57888200  | C          | -1.61246200 | -0.00296100 | -2.71669300 |
| N | 2.13732100  | 1.38437100  | -0.02100800 | C          | -2.91478900 | -0.40574800 | -2.32634000 |
| N | 1.74212400  | 2.34530200  | -0.74814200 | C          | -2.95581200 | -1.86278500 | -2.26883200 |
| N | 2.44231800  | 3.47054000  | -0.68062400 | O          | -1.51236800 | -1.05375200 | 2.45900300  |
| C | 1.85581000  | 4.59068100  | -1.44238000 | C          | 0.66186500  | -2.53503000 | 0.96651400  |
| H | 2.48408800  | 5.45529700  | -1.21065700 | C          | 1.80795400  | -2.21362300 | 0.03574700  |
| C | 1.93897600  | 4.32295900  | -2.94963400 | C          | 2.05718900  | -0.93578400 | -0.34820100 |
| H | 1.34661600  | 3.44051600  | -3.20750000 | O          | 0.81522800  | -3.03475000 | 2.07265700  |
| H | 2.97334300  | 4.14564200  | -3.25890000 | C          | -0.09452000 | 0.36384900  | 0.07018500  |
| C | 0.42300200  | 4.89410300  | -0.98669700 | C          | 1.26619800  | 0.25724100  | -0.11242500 |
| H | -0.23762800 | 4.05711800  | -1.22082400 | C          | -2.57725100 | -0.68786800 | 1.97560600  |
| H | 0.37768200  | 5.05293400  | 0.09381700  | O          | -2.83823600 | -0.57985900 | 0.69662600  |
| C | 3.51764100  | 3.68075300  | 0.31110300  | C          | -3.77407100 | -0.33374800 | 2.89786800  |
| H | 3.76331400  | 2.67591800  | 0.65884400  | C          | 0.60011300  | -1.25587400 | -3.32183600 |
| C | 4.76321500  | 4.29048100  | -0.33958900 | H          | 0.61819700  | -1.28291500 | -4.41930000 |
| H | 5.09666800  | 3.68422200  | -1.18675600 | H          | 1.12052700  | -2.14065400 | -2.94987800 |
| H | 5.57535300  | 4.33368300  | 0.39305100  | H          | 1.15975400  | -0.37685200 | -2.99444500 |
| H | 4.58896000  | 5.31221000  | -0.69392400 | C          | -1.22636500 | -3.77464200 | -2.67523900 |
| C | 3.00485800  | 4.50029300  | 1.50361800  | H          | -0.57380400 | -3.98492300 | -1.81823300 |
| H | 2.12235500  | 4.02636200  | 1.94180000  | H          | -0.66212000 | -3.97311800 | -3.59220300 |
| H | 3.78056400  | 4.57397200  | 2.27295500  | H          | -2.06845700 | -4.46837700 | -2.63449400 |
| H | 2.73506400  | 5.51878200  | 1.20235300  | C          | -4.16876700 | -2.63315100 | -1.84730700 |
| H | 0.04695100  | 5.79102400  | -1.48997900 | H          | -3.95555600 | -3.69895100 | -1.74718200 |
| H | 1.54806200  | 5.17713800  | -3.51190800 | H          | -4.98741800 | -2.51188300 | -2.56696700 |



|   |             |             |             |               |             |             |             |
|---|-------------|-------------|-------------|---------------|-------------|-------------|-------------|
| H | -4.51827500 | -2.26542800 | -0.87654600 | H             | 3.68367800  | 2.75534100  | 0.65587700  |
| C | -4.09988200 | 0.45581400  | -2.01926500 | C             | 4.64835500  | 4.36312700  | -0.38865900 |
| H | -4.33690700 | 0.39405500  | -0.95062800 | H             | 4.97313800  | 3.74057400  | -1.22733900 |
| H | -4.97618900 | 0.11441000  | -2.58075000 | H             | 5.47450800  | 4.43565400  | 0.32583300  |
| H | -3.92159300 | 1.50238300  | -2.27550800 | H             | 4.45181500  | 5.37303400  | -0.76484600 |
| C | -1.11648200 | 1.37411600  | -3.04738300 | C             | 2.93193600  | 4.58655600  | 1.49267900  |
| H | -1.87661500 | 2.13382400  | -2.85602100 | H             | 2.06211800  | 4.11359600  | 1.95651800  |
| H | -0.84884700 | 1.42889700  | -4.10958400 | H             | 3.72438700  | 4.67398200  | 2.24319400  |
| H | -0.23069900 | 1.63207300  | -2.45889300 | H             | 2.65015600  | 5.60007100  | 1.18578400  |
| C | -4.29079800 | -1.67221200 | 3.46534900  | H             | -0.14685900 | 5.77271700  | -1.42817300 |
| H | -5.11223800 | -1.49364700 | 4.16881600  | H             | 1.37168900  | 5.24186500  | -3.46846400 |
| H | -3.48820800 | -2.20028500 | 3.98678600  | H             | 3.03798600  | -0.74217300 | -0.78256800 |
| H | -4.66465500 | -2.31974400 | 2.66402600  | C             | 2.74176300  | -3.36697700 | -0.28536400 |
| C | -3.24127500 | 0.55148800  | 4.03953200  | H             | 2.88365200  | -3.44422500 | -1.36969500 |
| H | -4.04024300 | 0.75591600  | 4.76184100  | H             | 2.27407200  | -4.29867400 | 0.04856000  |
| H | -2.87397100 | 1.50645800  | 3.65205600  | C             | 4.08935400  | -3.20377500 | 0.39966200  |
| H | -2.41501500 | 0.05425800  | 4.55170300  | C             | 4.15494200  | -3.14149600 | 1.79985200  |
| C | -4.89520600 | 0.39518300  | 2.14457600  | C             | 5.26841500  | -3.09900600 | -0.34436600 |
| H | -5.70577100 | 0.64913900  | 2.83754900  | C             | 5.38473700  | -2.98830900 | 2.43679400  |
| H | -5.30761300 | -0.22811500 | 1.34649900  | H             | 3.23080500  | -3.19988000 | 2.36972500  |
| H | -4.52353300 | 1.32043100  | 1.69436600  | C             | 6.50158200  | -2.94426000 | 0.29575500  |
| C | -0.67592400 | 1.52539700  | 0.76604700  | H             | 5.22473800  | -3.14382000 | -1.43029000 |
| C | -0.08702600 | 1.97208500  | 1.96880800  | C             | 6.56223400  | -2.88985000 | 1.68799900  |
| C | -1.83672200 | 2.18435300  | 0.32524100  | H             | 5.42557100  | -2.94293100 | 3.52163400  |
| C | -0.61055800 | 3.05611700  | 2.66708000  | H             | 7.41063800  | -2.86671400 | -0.29454200 |
| H | 0.78446400  | 1.44975100  | 2.34693400  | H             | 7.51910100  | -2.76900600 | 2.18821800  |
| C | -2.35926800 | 3.27341500  | 1.01962600  | <b>TS14a'</b> |             |             |             |
| H | -2.32976100 | 1.83747600  | -0.57037600 | Rh            | -1.41349400 | -0.87028200 | -0.56559300 |
| C | -1.74615400 | 3.72122300  | 2.19161500  | N             | -0.39180100 | -1.99866800 | 0.54591900  |
| H | -0.14180900 | 3.37304200  | 3.59447500  | C             | -1.20295900 | -2.13796500 | -2.45988100 |
| H | -3.24966800 | 3.77089400  | 0.64527400  | C             | -0.79144600 | -0.78156800 | -2.69614200 |
| H | -2.15629800 | 4.56563900  | 2.73784000  | C             | -1.94432200 | 0.06880000  | -2.49453900 |
| N | 2.10877100  | 1.41472200  | -0.04191300 | C             | -3.05982200 | -0.78632000 | -2.17195800 |
| N | 1.66456300  | 2.37733200  | -0.73838400 | C             | -2.61456800 | -2.14320100 | -2.17447800 |
| N | 2.32742900  | 3.52356000  | -0.66378600 | O             | -3.99272600 | -1.85520700 | 0.92134100  |
| C | 1.70116900  | 4.63312000  | -1.40827400 | C             | 0.68559300  | -2.67836400 | 0.87262800  |
| H | 2.29587100  | 5.51687500  | -1.15994900 | C             | 1.85217700  | -2.28148000 | -0.00024200 |
| C | 1.79695200  | 4.39523300  | -2.91982900 | C             | 2.12996500  | -1.01349700 | -0.38592500 |
| H | 1.24207200  | 3.49350800  | -3.19387800 | O             | 0.77529100  | -3.59791800 | 1.70677900  |
| H | 2.83803800  | 4.26618000  | -3.23048300 | C             | 0.07724400  | 0.42831300  | 0.14469600  |
| C | 0.25767800  | 4.87484200  | -0.94930200 | C             | 1.41211900  | 0.21923600  | -0.10995900 |
| H | -0.37477000 | 4.02386300  | -1.20906000 | C             | -3.65739500 | -0.73542100 | 1.30368800  |
| H | 0.20448900  | 4.99988200  | 0.13529700  | O             | -2.68340100 | -0.01288900 | 0.80801500  |
| C | 3.42326600  | 3.75371400  | 0.30048300  | C             | -4.39502200 | 0.00801900  | 2.44505600  |

|   |             |             |             |             |             |             |             |
|---|-------------|-------------|-------------|-------------|-------------|-------------|-------------|
| C | 0.53645600  | -0.32166400 | -3.20777200 | N           | 1.86849300  | 2.31313400  | -0.76186500 |
| H | 0.52102700  | -0.30518500 | -4.30484800 | N           | 2.57319400  | 3.43379400  | -0.71482900 |
| H | 1.34034000  | -0.98631700 | -2.88712100 | C           | 1.98344000  | 4.54967200  | -1.47985400 |
| H | 0.77461700  | 0.68105200  | -2.84741500 | H           | 2.65388000  | 5.39764100  | -1.31443900 |
| C | -0.33580500 | -3.35706100 | -2.52731000 | C           | 1.96962400  | 4.23097700  | -2.97950900 |
| H | 0.71992700  | -3.08776300 | -2.56845700 | H           | 1.32606800  | 3.36811500  | -3.17396300 |
| H | -0.57627200 | -3.95024300 | -3.41692700 | H           | 2.97599900  | 3.99711400  | -3.33917600 |
| H | -0.48614200 | -3.98507500 | -1.64561300 | C           | 0.58995600  | 4.91838500  | -0.95550500 |
| C | -3.45856700 | -3.33886000 | -1.86757600 | H           | -0.10416300 | 4.08961500  | -1.10948200 |
| H | -2.87511100 | -4.26023400 | -1.91570600 | H           | 0.61340100  | 5.12886700  | 0.11668400  |
| H | -4.28733900 | -3.41968600 | -2.58041100 | C           | 3.69508400  | 3.63953000  | 0.22586200  |
| H | -3.87502000 | -3.23764000 | -0.86077400 | H           | 3.90480700  | 2.64210200  | 0.61572100  |
| C | -4.45516100 | -0.32634700 | -1.88833700 | C           | 4.94224200  | 4.15133900  | -0.50252000 |
| H | -4.97862700 | -1.05375000 | -1.26772100 | H           | 5.21880100  | 3.47938800  | -1.32002600 |
| H | -5.00845400 | -0.18339100 | -2.82473600 | H           | 5.78201400  | 4.20442100  | 0.19760800  |
| H | -4.44637000 | 0.62361500  | -1.34845400 | H           | 4.79703400  | 5.15564800  | -0.91532800 |
| C | -2.00103600 | 1.53255800  | -2.81177500 | C           | 3.26765600  | 4.54366800  | 1.39022700  |
| H | -2.85170200 | 2.01410300  | -2.32448100 | H           | 2.38794800  | 4.13085100  | 1.89197500  |
| H | -2.11374400 | 1.68060300  | -3.89366900 | H           | 4.08019800  | 4.62319000  | 2.11975000  |
| H | -1.08852400 | 2.04319100  | -2.49489100 | H           | 3.02847100  | 5.55635800  | 1.04702100  |
| C | -5.48578000 | -0.90217900 | 3.02383500  | H           | 0.20787600  | 5.80086600  | -1.47914700 |
| H | -6.02134600 | -0.38249900 | 3.82649300  | H           | 1.58478300  | 5.08382800  | -3.54768700 |
| H | -5.05279800 | -1.82012500 | 3.42983400  | H           | 3.09128000  | -0.85640000 | -0.87450000 |
| H | -6.20490100 | -1.19186900 | 2.25287700  | C           | 2.77401600  | -3.43670700 | -0.36805000 |
| C | -3.36966400 | 0.38803800  | 3.53262400  | H           | 3.00962200  | -3.40011200 | -1.43759400 |
| H | -3.87174300 | 0.91210100  | 4.35425500  | H           | 2.25016800  | -4.37465800 | -0.16587200 |
| H | -2.59168100 | 1.03725700  | 3.12558400  | C           | 4.06166100  | -3.39096300 | 0.43814700  |
| H | -2.88858700 | -0.50534800 | 3.94493600  | C           | 4.02521500  | -3.58361800 | 1.82724200  |
| C | -5.02206700 | 1.28835300  | 1.85484000  | C           | 5.28819500  | -3.13176100 | -0.18239600 |
| H | -5.56304500 | 1.83730200  | 2.63387300  | C           | 5.20102000  | -3.52655600 | 2.57331300  |
| H | -5.73570300 | 1.04673600  | 1.05810900  | H           | 3.06302600  | -3.76405800 | 2.29933800  |
| H | -4.24721800 | 1.94076100  | 1.44518600  | C           | 6.46653900  | -3.07374200 | 0.56701500  |
| C | -0.36055100 | 1.55524100  | 0.97936200  | H           | 5.32455900  | -2.98074800 | -1.25911000 |
| C | 0.31094400  | 1.79978400  | 2.19679400  | C           | 6.42552200  | -3.27154600 | 1.94721500  |
| C | -1.43353000 | 2.40033100  | 0.64240200  | H           | 5.16275800  | -3.67958500 | 3.64848400  |
| C | -0.05171900 | 2.86464100  | 3.01780900  | H           | 7.41305600  | -2.87558900 | 0.07115000  |
| H | 1.12581700  | 1.14375000  | 2.48411400  | H           | 7.33984800  | -3.22636200 | 2.53247700  |
| C | -1.78790800 | 3.47356500  | 1.45495000  | <b>15a'</b> |             |             |             |
| H | -1.99228500 | 2.20397200  | -0.26067500 | Rh          | 1.25726000  | -1.65656500 | -0.05975300 |
| C | -1.09924900 | 3.71351000  | 2.64655600  | N           | 0.32344600  | -0.07863000 | -1.06360700 |
| H | 0.47736600  | 3.02705500  | 3.95259800  | C           | 2.20009300  | -2.68562200 | -1.74795600 |
| H | -2.61170600 | 4.11881200  | 1.16305900  | C           | 1.31530900  | -3.58549400 | -1.09728500 |
| H | -1.38459600 | 4.54348600  | 3.28641900  | C           | 1.78580400  | -3.77339300 | 0.28087400  |
| N | 2.30550000  | 1.33385700  | -0.08064100 | C           | 2.94555600  | -2.98660800 | 0.47034200  |

|   |             |             |             |   |             |             |             |
|---|-------------|-------------|-------------|---|-------------|-------------|-------------|
| C | 3.18437700  | -2.24902800 | -0.76562400 | C | -1.45930900 | -1.57201600 | 1.01922000  |
| O | 3.36597700  | 0.30957300  | 1.61842200  | C | -2.55378000 | -1.84885500 | -1.12248100 |
| C | 1.11503300  | 0.86978600  | -1.69022700 | C | -2.05216700 | -2.76003200 | 1.46657500  |
| C | 0.45030500  | 2.09813000  | -2.09969400 | H | -0.84948000 | -0.97671600 | 1.68798700  |
| C | -0.89088400 | 2.25610800  | -1.87384900 | C | -3.14518500 | -3.02599300 | -0.67025200 |
| O | 2.33137600  | 0.65342000  | -1.89152600 | H | -2.74883100 | -1.48590300 | -2.12700000 |
| C | -1.00648700 | 0.09451100  | -0.83747500 | C | -2.88850200 | -3.49338500 | 0.62634500  |
| C | -1.66131200 | 1.25811600  | -1.22238400 | H | -1.86652300 | -3.09705100 | 2.48260200  |
| C | 2.17366600  | 0.45565500  | 1.88609900  | H | -3.80486200 | -3.58513900 | -1.32791800 |
| O | 1.20356400  | -0.33514100 | 1.50244300  | H | -3.35311600 | -4.41031200 | 0.97732200  |
| C | 1.65631000  | 1.65292300  | 2.71736000  | N | -3.04252300 | 1.49826300  | -1.04941600 |
| C | 0.13204900  | -4.28033800 | -1.69138900 | N | -3.47439300 | 1.07167900  | 0.06711700  |
| H | 0.39058000  | -5.31287800 | -1.95810500 | N | -4.77601000 | 1.23659700  | 0.29481600  |
| H | -0.21351100 | -3.76989200 | -2.59141700 | C | -5.25798800 | 0.60893800  | 1.54076500  |
| H | -0.70316100 | -4.31036800 | -0.98790100 | H | -6.13414800 | 1.18576500  | 1.84990700  |
| C | 2.14638100  | -2.22971500 | -3.17168900 | C | -5.68205000 | -0.85138800 | 1.31874600  |
| H | 1.16268700  | -2.40963100 | -3.60969200 | H | -4.83437900 | -1.43477500 | 0.94933200  |
| H | 2.88914700  | -2.77709400 | -3.76502300 | H | -6.49695200 | -0.92817600 | 0.59382400  |
| H | 2.36069900  | -1.16083100 | -3.22206000 | C | -4.21252600 | 0.71860600  | 2.65689100  |
| C | 4.34871700  | -1.34760700 | -0.99134600 | H | -3.34700900 | 0.08644700  | 2.45115700  |
| H | 4.28832600  | -0.85215100 | -1.95714100 | H | -3.86264500 | 1.74842700  | 2.76606000  |
| H | 5.27416900  | -1.93593900 | -0.92632200 | C | -5.66911900 | 1.73174200  | -0.77492300 |
| H | 4.36226100  | -0.58007100 | -0.21290900 | H | -5.10765600 | 2.54728800  | -1.24164600 |
| C | 3.79291300  | -2.87433500 | 1.69775200  | C | -5.91288600 | 0.66206800  | -1.85339100 |
| H | 4.04800400  | -1.82772500 | 1.87438300  | H | -4.96373700 | 0.24963400  | -2.20074400 |
| H | 4.71594800  | -3.45278900 | 1.56569800  | H | -6.42669400 | 1.10797900  | -2.71163500 |
| H | 3.27499200  | -3.25922800 | 2.57869200  | H | -6.53455000 | -0.15290500 | -1.47134000 |
| C | 1.12769700  | -4.66988400 | 1.28149800  | C | -6.97780800 | 2.29614600  | -0.22203300 |
| H | 1.40233400  | -4.39562900 | 2.30171200  | H | -6.79745200 | 3.04872400  | 0.55152400  |
| H | 1.43180200  | -5.71062800 | 1.11325100  | H | -7.52858300 | 2.77494800  | -1.03745700 |
| H | 0.03977700  | -4.61925700 | 1.19545900  | H | -7.62382700 | 1.51498300  | 0.19260600  |
| C | 2.84525600  | 2.45716300  | 3.25922600  | H | -4.66384700 | 0.39893200  | 3.60171400  |
| H | 2.48487600  | 3.32077000  | 3.82991500  | H | -6.02562300 | -1.29502900 | 2.25956600  |
| H | 3.47003000  | 2.81741600  | 2.44022200  | H | -1.39698000 | 3.17280600  | -2.16755700 |
| H | 3.47079800  | 1.84264900  | 3.91408500  | C | 1.32246800  | 3.18726200  | -2.68323500 |
| C | 0.79998400  | 2.53054400  | 1.77802900  | H | 0.70495800  | 3.87478500  | -3.27173800 |
| H | 0.41173100  | 3.39757000  | 2.32461300  | H | 2.05735200  | 2.72768800  | -3.35112600 |
| H | -0.04417900 | 1.96336500  | 1.37670900  | C | 2.04352300  | 3.95848700  | -1.58661100 |
| H | 1.39300200  | 2.90258800  | 0.93964400  | C | 3.26260500  | 3.49954700  | -1.06761800 |
| C | 0.78705200  | 1.13673900  | 3.88061100  | C | 1.46449800  | 5.10608100  | -1.02943200 |
| H | 0.42171500  | 1.97995700  | 4.47810000  | C | 3.88360200  | 4.17592000  | -0.01639700 |
| H | 1.35976700  | 0.47773600  | 4.54359900  | H | 3.69214400  | 2.58890900  | -1.46901200 |
| H | -0.07695700 | 0.58109000  | 3.50701500  | C | 2.08422100  | 5.78270200  | 0.02244600  |
| C | -1.70074700 | -1.10797300 | -0.28656300 | H | 0.51489300  | 5.46741400  | -1.41802700 |

|              |             |             |             |   |             |             |             |
|--------------|-------------|-------------|-------------|---|-------------|-------------|-------------|
| C            | 3.29752700  | 5.31809500  | 0.53390400  | H | -3.39528200 | -2.32293000 | 3.94818200  |
| H            | 4.82232200  | 3.80018300  | 0.38109500  | H | -4.52588600 | -2.52842100 | 2.59631300  |
| H            | 1.61841600  | 6.66980400  | 0.44342100  | C | -3.35338100 | 0.43935500  | 4.00152900  |
| H            | 3.77910600  | 5.83789000  | 1.35740000  | H | -4.18188100 | 0.58546100  | 4.70437300  |
| <b>TS14a</b> |             |             |             |   |             |             |             |
| Rh           | -1.31444600 | -1.06966900 | -0.71204100 | H | -3.04686100 | 1.41848400  | 3.62072100  |
| N            | -0.29177400 | -2.37691000 | 0.21787300  | H | -2.50511100 | 0.00374600  | 4.53304800  |
| C            | -1.52687500 | -2.39875500 | -2.63303900 | C | -4.94796700 | 0.16191000  | 2.07028000  |
| C            | -0.69132300 | -1.22560900 | -2.83110700 | H | -5.79029700 | 0.35738400  | 2.74428400  |
| C            | -1.53608900 | -0.05119000 | -2.74810900 | H | -5.29593100 | -0.48996600 | 1.26456400  |
| C            | -2.82777000 | -0.49347800 | -2.36209500 | H | -4.63515800 | 1.11187600  | 1.62613800  |
| C            | -2.81985600 | -1.95195900 | -2.29036100 | C | -0.75220300 | 1.52412800  | 0.75977600  |
| O            | -1.46221800 | -0.97899800 | 2.45538400  | C | -0.20303000 | 2.02123800  | 1.96239300  |
| C            | 0.71362200  | -2.47780100 | 1.07699700  | C | -1.94157400 | 2.11189800  | 0.29473000  |
| C            | 1.84142200  | -2.14158200 | 0.11299800  | C | -0.79468100 | 3.08384900  | 2.63742100  |
| C            | 2.08470900  | -0.84994500 | -0.24600200 | H | 0.68850500  | 1.55123600  | 2.36163900  |
| O            | 0.87657900  | -2.93184800 | 2.19786900  | C | -2.53033700 | 3.18267400  | 0.96401100  |
| C            | -0.11316100 | 0.37913400  | 0.09273300  | H | -2.40359100 | 1.72423300  | -0.60006300 |
| C            | 1.26189600  | 0.31759200  | -0.04457400 | C | -1.95816600 | 3.67935400  | 2.13671700  |
| C            | -2.55601100 | -0.74807000 | 1.95010900  | H | -0.35744200 | 3.43873600  | 3.56639400  |
| O            | -2.81382300 | -0.72201900 | 0.66895800  | H | -3.44126100 | 3.62549300  | 0.57098400  |
| C            | -3.79235900 | -0.48211000 | 2.84933800  | H | -2.42067800 | 4.50801100  | 2.66498900  |
| C            | 0.73079500  | -1.23380900 | -3.29660000 | N | 2.06151100  | 1.50572700  | 0.02033400  |
| H            | 0.78231500  | -1.25489000 | -4.39303700 | N | 1.59282200  | 2.44258500  | -0.69544000 |
| H            | 1.26343200  | -2.10731600 | -2.91466300 | N | 2.21273900  | 3.61292300  | -0.62699000 |
| H            | 1.25892100  | -0.34280000 | -2.94900700 | C | 1.54866200  | 4.69276700  | -1.38327500 |
| C            | -1.01976900 | -3.80591700 | -2.66657800 | H | 2.10092500  | 5.60216600  | -1.12953200 |
| H            | -0.33214100 | -3.97766000 | -1.82972100 | C | 1.67526400  | 4.45529300  | -2.89248500 |
| H            | -0.48060500 | -4.00217800 | -3.59929100 | H | 1.16386800  | 3.52961700  | -3.17090900 |
| H            | -1.83447900 | -4.52798400 | -2.58433500 | H | 2.72510500  | 4.37094400  | -3.18867400 |
| C            | -4.01300400 | -2.75889900 | -1.88021600 | C | 0.09003700  | 4.87224200  | -0.94376300 |
| H            | -3.76783900 | -3.81735100 | -1.77434800 | H | -0.50017500 | 3.99197400  | -1.20486400 |
| H            | -4.82570100 | -2.66594600 | -2.61077700 | H | 0.01768100  | 5.00238800  | 0.13913400  |
| H            | -4.38505300 | -2.39941500 | -0.91478000 | C | 3.28499200  | 3.89368900  | 0.35051900  |
| C            | -4.05014000 | 0.32564400  | -2.08470400 | H | 3.59019800  | 2.90848000  | 0.70679200  |
| H            | -4.31518300 | 0.24987600  | -1.02367700 | C | 4.48615900  | 4.56522100  | -0.32227400 |
| H            | -4.89786500 | -0.04326300 | -2.67233100 | H | 4.84883600  | 3.96420600  | -1.16110200 |
| H            | -3.90248900 | 1.37903600  | -2.33261000 | H | 5.30027300  | 4.67222600  | 0.40159500  |
| C            | -1.08263800 | 1.34208200  | -3.07121900 | H | 4.24589900  | 5.56713700  | -0.69417500 |
| H            | -1.86816000 | 2.07607900  | -2.88182100 | C | 2.73893900  | 4.69715000  | 1.53929300  |
| H            | -0.80856700 | 1.41060300  | -4.13094000 | H | 1.88621000  | 4.18167100  | 1.98912600  |
| H            | -0.21050200 | 1.62660100  | -2.47458200 | H | 3.51588200  | 4.81888300  | 2.30118600  |
| C            | -4.22185800 | -1.85559000 | 3.40614700  | H | 2.41344300  | 5.69737600  | 1.23205000  |
| H            | -5.07108200 | -1.73995000 | 4.08971200  | H | -0.34821200 | 5.74780100  | -1.43406600 |
|              |             |             |             | H | 1.22097900  | 5.28102600  | -3.44962100 |

|              |             |             |             |   |             |             |             |
|--------------|-------------|-------------|-------------|---|-------------|-------------|-------------|
| H            | 3.07772200  | -0.63956400 | -0.64343700 | H | 1.36701000  | 4.99761500  | 1.08308900  |
| C            | 2.76544000  | -3.29055300 | -0.24366300 | H | 0.58441800  | 6.63990500  | 2.78074900  |
| H            | 2.88159700  | -3.35953200 | -1.33156100 | H | -1.66736800 | 7.67662600  | 2.56636300  |
| H            | 2.30753100  | -4.22567300 | 0.09405600  | C | 0.04494200  | 4.09451900  | -1.12014700 |
| C            | 4.12692900  | -3.12344200 | 0.41241000  | H | -0.57686900 | 4.16490400  | -2.01856700 |
| C            | 4.22237200  | -3.07000300 | 1.81135100  | H | 1.07816800  | 4.31109000  | -1.40507000 |
| C            | 5.28796700  | -3.00223900 | -0.35706600 | C | -0.01777800 | 2.67847500  | -0.57083200 |
| C            | 5.46462400  | -2.91019500 | 2.42199400  | C | -1.13805400 | 1.92913800  | -0.71941400 |
| H            | 3.31196400  | -3.13792600 | 2.40207900  | H | -2.00209300 | 2.42281300  | -1.16113300 |
| C            | 6.53348900  | -2.84122100 | 0.25695700  | C | 1.24746200  | 2.20656600  | 0.08410200  |
| H            | 5.22038300  | -3.03917500 | -1.44201300 | N | 1.18475500  | 0.90407000  | 0.52058500  |
| C            | 6.62421500  | -2.79623600 | 1.64794500  | O | 2.23569600  | 2.94367900  | 0.18849800  |
| H            | 5.52904400  | -2.87133500 | 3.50588600  | C | 2.78519400  | -0.72171700 | 1.76232100  |
| H            | 7.42858200  | -2.75119200 | -0.35250600 | C | 3.41282700  | -1.45621200 | 2.96847100  |
| H            | 7.59076200  | -2.67023500 | 2.12780000  | C | 4.14702400  | -0.46898400 | 3.88596100  |
| <b>TS12c</b> |             |             |             | H | 4.56423000  | -1.00298100 | 4.74691200  |
| C            | 0.95674300  | -1.36947100 | -2.80966000 | H | 4.96510800  | 0.02891600  | 3.35735100  |
| C            | 1.26883200  | 0.04084500  | -2.94586300 | H | 3.46882300  | 0.30669300  | 4.24882500  |
| C            | 2.67389600  | 0.22597200  | -2.64226100 | C | 4.38244800  | -2.53286900 | 2.44772000  |
| C            | 3.18165500  | -1.01959900 | -2.19833500 | H | 4.81301000  | -3.08755400 | 3.28851500  |
| C            | 2.11775300  | -2.01384500 | -2.30989900 | H | 3.86389600  | -3.23687800 | 1.79277200  |
| Rh           | 1.44143100  | -0.50123800 | -0.80564500 | H | 5.20755000  | -2.08081100 | 1.88549500  |
| C            | 3.40471800  | 1.53333400  | -2.72015800 | C | 2.23790500  | -2.12112700 | 3.71961900  |
| C            | 0.37295200  | 1.06251300  | -3.57575100 | H | 2.61721900  | -2.67015400 | 4.58897200  |
| H            | 0.43158600  | 0.99766300  | -4.67020400 | H | 1.52513600  | -1.36971000 | 4.07379800  |
| H            | -0.66808300 | 0.90996400  | -3.28231800 | H | 1.69912900  | -2.81257000 | 3.06773000  |
| H            | 0.65547700  | 2.07455500  | -3.28049100 | O | 2.26803600  | -1.48481600 | 0.87203400  |
| C            | -0.37554800 | -1.98038700 | -3.13008800 | O | 2.78220700  | 0.53375400  | 1.75029300  |
| C            | 2.29699400  | -3.45822400 | -1.95077400 | H | 4.48426200  | 1.38607200  | -2.64561800 |
| H            | 1.36510300  | -4.01898300 | -2.05050200 | H | 3.19779200  | 2.03138700  | -3.67339800 |
| H            | 3.04387800  | -3.92956500 | -2.60049000 | H | 3.10927900  | 2.21258400  | -1.91195500 |
| H            | 2.64261000  | -3.55296800 | -0.91596300 | H | -1.18685800 | -1.43246800 | -2.64077700 |
| C            | 4.55601400  | -1.32603400 | -1.68571100 | H | -0.55537700 | -1.96719300 | -4.21193000 |
| H            | 4.49075400  | -1.90631900 | -0.76018200 | H | -0.43204700 | -3.01802300 | -2.79340700 |
| H            | 5.12991500  | -1.91490700 | -2.41191600 | C | -1.40162000 | 0.56884600  | -0.28919000 |
| H            | 5.11316200  | -0.41339600 | -1.46538000 | C | -0.46941400 | -0.40328800 | 0.02063600  |
| C            | -2.13850300 | 6.62060500  | 0.74536700  | C | -0.76305500 | -1.48650200 | 0.97744500  |
| C            | -1.69043500 | 5.70204000  | -0.20648200 | C | -0.41820800 | -2.82518200 | 0.72373100  |
| C            | -0.42380700 | 5.11641200  | -0.09621300 | C | -1.35612700 | -1.18001800 | 2.21838800  |
| C            | 0.39047200  | 5.46290100  | 0.99201900  | C | -0.69385500 | -3.82692600 | 1.65142600  |
| C            | -0.05714000 | 6.37949900  | 1.94320400  | H | 0.06707500  | -3.07219700 | -0.21303000 |
| C            | -1.32200700 | 6.96209300  | 1.82427800  | C | -1.61947600 | -2.17922500 | 3.15313600  |
| H            | -3.12300600 | 7.06912000  | 0.64192300  | H | -1.60871600 | -0.14710500 | 2.43488100  |
| H            | -2.33014600 | 5.44077700  | -1.04658000 | C | -1.29620500 | -3.51033000 | 2.87181800  |

|            |             |             |             |   |             |             |             |
|------------|-------------|-------------|-------------|---|-------------|-------------|-------------|
| H          | -0.43091300 | -4.85659200 | 1.42498300  | H | 4.23844300  | -2.16958500 | 1.73436200  |
| H          | -2.06945500 | -1.91796300 | 4.10710800  | H | 5.60437400  | -2.70919600 | 0.74219100  |
| H          | -1.49938500 | -4.28914000 | 3.60116300  | H | 5.25668000  | -0.96865700 | 0.94192500  |
| N          | -2.78831700 | 0.33032600  | -0.10545600 | C | -0.78371200 | 6.16111400  | 0.11369100  |
| N          | -3.14872900 | -0.80678400 | -0.54740300 | C | -1.13961300 | 5.16736000  | -0.80110100 |
| N          | -4.39368000 | -1.17638900 | -0.29358900 | C | -0.22058000 | 4.18483800  | -1.18703000 |
| C          | -4.73821600 | -2.52089100 | -0.79787800 | C | 1.06807200  | 4.20776300  | -0.63205700 |
| H          | -5.75389800 | -2.71146200 | -0.43991500 | C | 1.42542000  | 5.20385900  | 0.27741900  |
| C          | -4.75316100 | -2.53264700 | -2.33092100 | C | 0.50252600  | 6.18352700  | 0.65407700  |
| H          | -3.75509100 | -2.30352000 | -2.71550600 | H | -1.50991700 | 6.91748500  | 0.39936300  |
| H          | -5.45254200 | -1.78732000 | -2.72145200 | H | -2.14208700 | 5.15754200  | -1.22343900 |
| C          | -3.80601300 | -3.59265500 | -0.22004100 | H | 1.77809000  | 3.43405000  | -0.90845600 |
| H          | -2.78477600 | -3.43688800 | -0.57260800 | H | 2.42826500  | 5.21182800  | 0.69395000  |
| H          | -3.78421600 | -3.55159400 | 0.87217900  | H | 0.78507600  | 6.95721800  | 1.36255700  |
| C          | -5.27685600 | -0.44223000 | 0.63665500  | C | -0.61789300 | 3.10095900  | -2.17800000 |
| H          | -4.76594800 | 0.50834300  | 0.79828600  | H | -1.52366400 | 3.40769700  | -2.71186500 |
| C          | -6.64326000 | -0.16336600 | 0.00284300  | H | 0.17844800  | 2.98147800  | -2.92100500 |
| H          | -6.53039100 | 0.36387100  | -0.94878400 | C | -0.85995000 | 1.76159000  | -1.51783000 |
| H          | -7.24027300 | 0.46198800  | 0.67424600  | C | -2.10239700 | 1.31425900  | -1.11759600 |
| H          | -7.20993000 | -1.08336200 | -0.17749200 | H | -2.97981000 | 1.92978400  | -1.28906600 |
| C          | -5.37682500 | -1.18161900 | 1.97816400  | C | 0.24195100  | 0.90161500  | -1.25662500 |
| H          | -4.38002400 | -1.35184600 | 2.39437300  | N | 0.05493600  | -0.29072900 | -0.64425700 |
| H          | -5.95825500 | -0.58838400 | 2.69154200  | O | 1.48383000  | 1.12737700  | -1.55950200 |
| H          | -5.87436400 | -2.15148600 | 1.86741100  | C | 3.07569700  | 0.88763100  | 1.59203800  |
| H          | -4.13835100 | -4.58940800 | -0.52837200 | C | 2.88866100  | 1.48537300  | 3.01033200  |
| H          | -5.04994900 | -3.51839700 | -2.70325500 | C | 4.13235100  | 1.10660800  | 3.83737300  |
| <b>13c</b> |             |             |             | H | 4.08702500  | 1.56810200  | 4.83045700  |
| C          | 2.21559900  | -2.59404700 | -1.85798700 | H | 4.19776400  | 0.02038000  | 3.97434500  |
| C          | 3.01212300  | -1.59407300 | -2.48726700 | H | 5.04049500  | 1.44115500  | 3.33050300  |
| C          | 4.07002500  | -1.20792100 | -1.55778300 | C | 1.61579200  | 0.97216600  | 3.69786900  |
| C          | 3.92947400  | -2.00454100 | -0.37888500 | H | 1.51401600  | 1.42658600  | 4.69052000  |
| C          | 2.76276100  | -2.83654200 | -0.53132300 | H | 0.72655600  | 1.21584900  | 3.11105400  |
| Rh         | 2.13676800  | -0.75772500 | -0.67259000 | H | 1.64466100  | -0.11506200 | 3.82192000  |
| C          | 5.12636100  | -0.17826500 | -1.80912200 | C | 2.81792800  | 3.01642800  | 2.84586500  |
| C          | 2.80184600  | -0.96761600 | -3.83167800 | H | 2.76142200  | 3.50434400  | 3.82604600  |
| H          | 3.66187900  | -1.15718400 | -4.48334600 | H | 3.70478100  | 3.38154200  | 2.32055800  |
| H          | 1.90877600  | -1.36122400 | -4.32046400 | H | 1.93455100  | 3.30669200  | 2.26913100  |
| H          | 2.67802100  | 0.11457500  | -3.72566000 | O | 2.08829400  | 0.14282100  | 1.19183700  |
| C          | 0.99826200  | -3.26976700 | -2.41063900 | O | 4.10472700  | 1.13836700  | 0.95592400  |
| C          | 2.30316700  | -3.89502300 | 0.42039400  | H | 5.23826400  | 0.45207000  | -0.92450600 |
| H          | 1.23693800  | -4.09769300 | 0.31419200  | H | 6.08508300  | -0.65700200 | -2.04408500 |
| H          | 2.85130200  | -4.82880500 | 0.23889200  | H | 4.84997900  | 0.46252800  | -2.64923700 |
| H          | 2.47497700  | -3.59824000 | 1.45665300  | H | 1.24786800  | -4.27728500 | -2.76446600 |
| C          | 4.81100500  | -1.95640200 | 0.82859800  | H | 0.22538500  | -3.36131600 | -1.64315200 |

|            |             |             |             |   |             |             |             |
|------------|-------------|-------------|-------------|---|-------------|-------------|-------------|
| H          | 0.57479300  | -2.70838200 | -3.24552700 | C | 3.27624600  | -1.41722600 | -2.79616300 |
| C          | -2.28119300 | 0.07401300  | -0.45336700 | C | 0.47382900  | -0.24916800 | -3.69659000 |
| C          | -1.14609300 | -0.71346600 | -0.20325300 | H | 0.47503800  | -0.59094900 | -4.74028100 |
| C          | -1.16776000 | -1.96413400 | 0.59467800  | H | -0.47074900 | 0.26305100  | -3.50337300 |
| C          | -2.01968400 | -3.03320400 | 0.27962000  | H | 1.28081900  | 0.47736300  | -3.57785700 |
| C          | -0.31650900 | -2.06812400 | 1.70684100  | C | -1.83019800 | -2.19181600 | -2.72696400 |
| C          | -2.02117200 | -4.18825600 | 1.06218200  | C | -0.36266700 | -4.59454100 | -1.00954300 |
| H          | -2.68091600 | -2.94892800 | -0.57543500 | H | -1.43374400 | -4.66385100 | -1.20930500 |
| C          | -0.34052700 | -3.21548600 | 2.50052600  | H | 0.11096200  | -5.49384800 | -1.41993700 |
| H          | 0.35575000  | -1.24768700 | 1.93800800  | H | -0.21701700 | -4.60627400 | 0.07546200  |
| C          | -1.18652100 | -4.27968500 | 2.17988900  | C | 2.68445500  | -4.04821400 | -0.97532900 |
| H          | -2.67958200 | -5.01307000 | 0.80392900  | H | 2.41419500  | -4.15658100 | 0.08037700  |
| H          | 0.30923400  | -3.27953900 | 3.36918700  | H | 2.69716300  | -5.05055100 | -1.42084500 |
| H          | -1.19770500 | -5.17416400 | 2.79650000  | H | 3.69653500  | -3.64170600 | -1.02046900 |
| N          | -3.51043500 | -0.41353400 | 0.02610600  | C | 0.64228300  | 6.70258800  | -0.11883600 |
| N          | -4.51492000 | 0.30390900  | -0.26029000 | C | 0.45204900  | 5.66051300  | -1.02977900 |
| N          | -5.67923300 | -0.10912200 | 0.25398500  | C | 1.30166700  | 4.54804800  | -1.03924100 |
| C          | -6.85061700 | 0.57634700  | -0.32232900 | C | 2.35105800  | 4.49458900  | -0.10786700 |
| H          | -7.72252800 | 0.11446800  | 0.14693700  | C | 2.53735400  | 5.53157000  | 0.80545900  |
| C          | -6.83618800 | 2.06506400  | 0.04572500  | C | 1.68674200  | 6.64055300  | 0.80375800  |
| H          | -5.95263000 | 2.54913500  | -0.37842200 | H | -0.02709800 | 7.55887900  | -0.13044900 |
| H          | -6.80890000 | 2.19449200  | 1.13149500  | H | -0.36746500 | 5.71210200  | -1.74333100 |
| C          | -6.94743300 | 0.36255100  | -1.84089400 | H | 3.01297500  | 3.63557900  | -0.08808500 |
| H          | -6.07872200 | 0.80355000  | -2.33741000 | H | 3.35018600  | 5.46902000  | 1.52380500  |
| H          | -6.97803200 | -0.70265800 | -2.08743100 | H | 1.83620500  | 7.44710200  | 1.51642500  |
| C          | -5.77305800 | -1.37789200 | 1.00262200  | C | 1.06321200  | 3.40742500  | -2.01789400 |
| H          | -4.80161000 | -1.47068000 | 1.49483900  | H | 0.25960900  | 3.68547600  | -2.70649600 |
| C          | -6.86056100 | -1.32791100 | 2.07878400  | H | 1.96523400  | 3.23599200  | -2.61023800 |
| H          | -6.76252700 | -0.42963100 | 2.69532200  | C | 0.68878200  | 2.11205900  | -1.30056100 |
| H          | -6.76152600 | -2.20215600 | 2.72980900  | C | -0.62208400 | 1.88691200  | -1.04450900 |
| H          | -7.87133900 | -1.35215800 | 1.65780700  | H | -1.27734300 | 2.69107900  | -1.37751400 |
| C          | -5.93542600 | -2.57599400 | 0.05602000  | C | 1.87628600  | 1.29111500  | -0.92907900 |
| H          | -5.14488100 | -2.56894100 | -0.69821500 | N | 1.70015100  | 0.29518700  | 0.03347300  |
| H          | -5.86967100 | -3.51577700 | 0.61473000  | O | 2.97761800  | 1.53597900  | -1.42991500 |
| H          | -6.90609200 | -2.54948100 | -0.45141400 | C | 3.78838000  | 0.44164200  | 1.14524800  |
| H          | -7.85238300 | 0.83474300  | -2.23715100 | C | 5.03827000  | -0.36428600 | 1.51528400  |
| H          | -7.72897000 | 2.56436200  | -0.34444500 | C | 5.97885000  | 0.54222600  | 2.32111300  |
| <b>11d</b> |             |             |             | H | 6.86875900  | -0.01982100 | 2.62317100  |
| C          | -0.37914600 | -2.34374700 | -2.37763000 | H | 6.29577800  | 1.40336400  | 1.72631900  |
| C          | 0.65684100  | -1.41112800 | -2.76939100 | H | 5.48184700  | 0.92441500  | 3.21610400  |
| C          | 1.95224700  | -2.00364800 | -2.42022600 | C | 5.73558600  | -0.86628700 | 0.23500300  |
| C          | 1.70072300  | -3.15688800 | -1.67008000 | H | 6.65584700  | -1.39879000 | 0.49855400  |
| C          | 0.24808100  | -3.36818400 | -1.61995100 | H | 5.08683800  | -1.54463000 | -0.32290800 |
| Rh         | 0.62059900  | -1.38889500 | -0.60267000 | H | 5.99592700  | -0.03203100 | -0.42361900 |

|   |             |             |             |              |             |             |             |
|---|-------------|-------------|-------------|--------------|-------------|-------------|-------------|
| C | 4.58083200  | -1.56628900 | 2.37325100  | H            | -5.61646800 | 2.52761500  | 2.84924600  |
| H | 5.45007300  | -2.15981000 | 2.67640700  | H            | -6.43040900 | 1.10228500  | 2.18726500  |
| H | 4.07064000  | -1.22483900 | 3.28069800  | H            | -6.50764000 | -1.99338400 | -0.03102600 |
| H | 3.89529200  | -2.20834000 | 1.81367400  | H            | -6.81723800 | -0.79105000 | -2.29762900 |
| O | 3.50516700  | 1.54437300  | 1.54716500  | C            | 0.93611400  | -1.44362800 | 2.48519700  |
| O | 2.99468800  | -0.30311800 | 0.32232200  | O            | 0.91445200  | -2.13749800 | 1.45263600  |
| H | 4.09987300  | -2.04864500 | -2.45817300 | O            | 1.00462100  | -0.13997300 | 2.50563500  |
| H | 3.34489900  | -1.32776300 | -3.88685400 | H            | 1.12929600  | 0.23411900  | 1.55585900  |
| H | 3.41529500  | -0.41927400 | -2.37008900 | C            | 0.82887100  | -2.08864300 | 3.83779200  |
| H | -2.25079300 | -1.28089100 | -2.28776500 | H            | 1.37668200  | -1.51443500 | 4.58664400  |
| H | -1.94975000 | -2.13238800 | -3.81472900 | H            | -0.23209500 | -2.09768200 | 4.11082100  |
| H | -2.42177700 | -3.03827300 | -2.37134800 | H            | 1.18802800  | -3.11682300 | 3.78959600  |
| C | -1.39575100 | 0.86153200  | -0.35249700 | <b>TS12d</b> |             |             |             |
| C | -1.05167300 | -0.40069700 | 0.03311100  | C            | -0.90083600 | -2.20105000 | -2.38457400 |
| C | -1.86878100 | -1.12438100 | 1.03759100  | C            | 0.26685500  | -1.42945900 | -2.77299100 |
| C | -2.29853500 | -2.44985400 | 0.86886900  | C            | 1.44798400  | -2.21477200 | -2.46180700 |
| C | -2.16275100 | -0.49925700 | 2.26887000  | C            | 1.02072500  | -3.36359900 | -1.75256900 |
| C | -2.99841100 | -3.12382300 | 1.86859600  | C            | -0.44033500 | -3.36531000 | -1.72416300 |
| H | -2.09009900 | -2.94645500 | -0.06638900 | Rh           | 0.32367700  | -1.54018500 | -0.56809200 |
| C | -2.85912500 | -1.17077300 | 3.27218400  | C            | 2.84576800  | -1.83833600 | -2.83570500 |
| H | -1.83325100 | 0.52174700  | 2.42701000  | C            | 0.23537700  | -0.21326300 | -3.64553200 |
| C | -3.28222300 | -2.49066300 | 3.08021000  | H            | 0.12993500  | -0.50757100 | -4.69798800 |
| H | -3.32634900 | -4.14584900 | 1.69766800  | H            | -0.60372800 | 0.43447700  | -3.38488700 |
| H | -3.06814500 | -0.66232800 | 4.20993000  | H            | 1.15215000  | 0.37101800  | -3.54749900 |
| H | -3.82305000 | -3.01475000 | 3.86285300  | C            | -2.31429200 | -1.78389600 | -2.66044300 |
| N | -2.69947600 | 1.39170000  | -0.04165200 | C            | -1.23918300 | -4.45865400 | -1.08554900 |
| N | -3.63600000 | 0.64000800  | -0.43617100 | H            | -2.30814300 | -4.35365400 | -1.28275700 |
| N | -4.87644700 | 1.02616700  | -0.14034200 | H            | -0.91932000 | -5.43532500 | -1.46453400 |
| C | -5.91371900 | 0.04256400  | -0.50363200 | H            | -1.08057200 | -4.44706200 | -0.00101900 |
| H | -6.85142200 | 0.45891400  | -0.12404000 | C            | 1.86495700  | -4.43666600 | -1.13720500 |
| C | -6.02311800 | -0.08727600 | -2.02754400 | H            | 1.51026200  | -4.65382500 | -0.12543200 |
| H | -5.07860400 | -0.45542100 | -2.43830800 | H            | 1.81624000  | -5.36342100 | -1.72233800 |
| H | -6.24351600 | 0.88102200  | -2.48672400 | H            | 2.90992800  | -4.12951900 | -1.06553000 |
| C | -5.67402900 | -1.31301400 | 0.17350300  | C            | 2.19179200  | 6.47346500  | -0.36539200 |
| H | -4.75224200 | -1.76418100 | -0.19852400 | C            | 1.81594800  | 5.42603000  | -1.21021400 |
| H | -5.57021200 | -1.20147300 | 1.25604100  | C            | 2.21019400  | 4.10962500  | -0.94377300 |
| C | -5.16076100 | 2.16359400  | 0.75674100  | C            | 2.98610400  | 3.85648100  | 0.19862500  |
| H | -4.22052400 | 2.71682300  | 0.79342700  | C            | 3.35531800  | 4.90092200  | 1.04524900  |
| C | -6.24201900 | 3.07777400  | 0.17144500  | C            | 2.96359300  | 6.21326500  | 0.76700400  |
| H | -5.97377700 | 3.39943700  | -0.83901200 | H            | 1.87693800  | 7.48877200  | -0.59177500 |
| H | -6.35043300 | 3.96834500  | 0.79888000  | H            | 1.20982800  | 5.63521600  | -2.08902600 |
| H | -7.22105700 | 2.58812300  | 0.12848800  | H            | 3.29701800  | 2.84636100  | 0.43975600  |
| C | -5.49599400 | 1.67477600  | 2.17281000  | H            | 3.94914500  | 4.68204500  | 1.92823600  |
| H | -4.69524900 | 1.03565700  | 2.55449000  | H            | 3.25406400  | 7.02403600  | 1.42946700  |



|   |             |             |             |            |             |             |             |
|---|-------------|-------------|-------------|------------|-------------|-------------|-------------|
| C | 1.79143300  | 2.98514200  | -1.88133600 | N          | -2.45295300 | 1.82061200  | -0.05264000 |
| H | 1.14353100  | 3.39021700  | -2.66519100 | N          | -3.49072700 | 1.22085300  | -0.46139300 |
| H | 2.67845300  | 2.56802400  | -2.36615500 | N          | -4.65749600 | 1.79330100  | -0.18887700 |
| C | 1.05681600  | 1.86476900  | -1.15745500 | C          | -5.82986100 | 1.00619600  | -0.61591600 |
| C | -0.28587700 | 1.93114000  | -1.00610400 | H          | -6.69836100 | 1.56937400  | -0.26255200 |
| H | -0.75215300 | 2.82963600  | -1.40741400 | C          | -5.89493000 | 0.92303300  | -2.14546600 |
| C | 1.96797800  | 0.78546900  | -0.64998700 | H          | -5.01500200 | 0.39768000  | -2.52795300 |
| N | 1.36081600  | -0.10536700 | 0.19606900  | H          | -5.91920800 | 1.92230300  | -2.59029100 |
| O | 3.17039300  | 0.80014600  | -0.95172900 | C          | -5.85041100 | -0.38069900 | 0.03863300  |
| C | 3.85232600  | -0.03062400 | 1.49296700  | H          | -4.99933900 | -0.97338700 | -0.30244700 |
| C | 5.31016200  | -0.31979000 | 1.10206400  | H          | -5.78113500 | -0.30531200 | 1.12691300  |
| C | 5.97572600  | -0.88841500 | 2.37782800  | C          | -4.78532600 | 2.95624900  | 0.71367100  |
| H | 7.03691600  | -1.08437100 | 2.18890800  | H          | -3.76612000 | 3.33343400  | 0.81275100  |
| H | 5.89345400  | -0.17822400 | 3.20557700  | C          | -5.65278000 | 4.05335000  | 0.08800400  |
| H | 5.50516100  | -1.82966900 | 2.68297600  | H          | -5.26931600 | 4.33855100  | -0.89589200 |
| C | 5.97905000  | 1.01155000  | 0.71345400  | H          | -5.64538200 | 4.93967400  | 0.73039300  |
| H | 7.04577300  | 0.85348000  | 0.51923700  | H          | -6.69669100 | 3.74120400  | -0.02572600 |
| H | 5.51275800  | 1.42229100  | -0.18571500 | C          | -5.28209400 | 2.51635300  | 2.09769300  |
| H | 5.87227700  | 1.74257700  | 1.51842300  | H          | -4.62653600 | 1.74447700  | 2.51026800  |
| C | 5.42378900  | -1.33305000 | -0.04518500 | H          | -5.29170800 | 3.37003100  | 2.78339900  |
| H | 6.47999900  | -1.50930400 | -0.27895800 | H          | -6.30100700 | 2.11581400  | 2.04966000  |
| H | 4.96394300  | -2.28793300 | 0.22403100  | H          | -6.77447000 | -0.90889300 | -0.21911800 |
| H | 4.92227800  | -0.94977500 | -0.93406800 | H          | -6.78971800 | 0.37777900  | -2.46279200 |
| O | 3.52832700  | 0.92382600  | 2.16910000  | C          | 0.52425000  | -2.46120000 | 2.44376600  |
| O | 2.95922500  | -0.98127600 | 1.09759100  | O          | 0.18129500  | -2.70565200 | 1.24209500  |
| H | 3.57805700  | -2.47321900 | -2.33561900 | O          | 1.40626000  | -1.63698800 | 2.81469300  |
| H | 2.98048100  | -1.94602500 | -3.91920200 | H          | 2.17828600  | -1.21047000 | 1.91652600  |
| H | 3.06793000  | -0.80317500 | -2.56531000 | C          | -0.22262400 | -3.22358500 | 3.51632900  |
| H | -2.54623900 | -0.82764000 | -2.17913200 | H          | 0.33029800  | -3.20783600 | 4.45608900  |
| H | -2.46873500 | -1.66823900 | -3.73942800 | H          | -1.19417400 | -2.74058100 | 3.65800500  |
| H | -3.03061700 | -2.52357400 | -2.29669100 | H          | -0.40613200 | -4.24981800 | 3.19041400  |
| C | -1.25095200 | 1.08282300  | -0.31890900 | <b>13d</b> |             |             |             |
| C | -1.13353800 | -0.20585100 | 0.11452300  | C          | 2.37238500  | -3.21236200 | -1.31006700 |
| C | -2.02644300 | -0.74556100 | 1.15643600  | C          | 2.78805500  | -1.99126200 | -1.95777700 |
| C | -2.73548800 | -1.94837400 | 1.00495900  | C          | 3.91739500  | -1.46909600 | -1.23357900 |
| C | -2.15879200 | -0.04876200 | 2.37452600  | C          | 4.21843600  | -2.37315300 | -0.13752800 |
| C | -3.58606900 | -2.41446400 | 2.00447500  | C          | 3.26334500  | -3.43864100 | -0.19003400 |
| H | -2.62336500 | -2.50924400 | 0.08752900  | Rh         | 2.21212600  | -1.53718600 | 0.07129900  |
| C | -3.00284900 | -0.51836000 | 3.37971200  | C          | 4.60792500  | -0.17896200 | -1.54068200 |
| H | -1.59667000 | 0.86833200  | 2.51426700  | C          | 2.17564600  | -1.35973300 | -3.16726000 |
| C | -3.73064900 | -1.69893900 | 3.19615900  | H          | 2.76000300  | -1.61141400 | -4.06091200 |
| H | -4.13771800 | -3.33831800 | 1.85357000  | H          | 1.15264400  | -1.71009300 | -3.31558400 |
| H | -3.08773900 | 0.03538300  | 4.31058000  | H          | 2.14709500  | -0.27538400 | -3.04323200 |
| H | -4.38966300 | -2.06378400 | 3.97865900  | C          | 1.32496200  | -4.15957100 | -1.79617200 |

|   |             |             |             |   |             |             |             |
|---|-------------|-------------|-------------|---|-------------|-------------|-------------|
| C | 3.14147300  | -4.58169600 | 0.76658000  | H | 5.38497700  | 0.04363100  | -0.80830400 |
| H | 2.08988700  | -4.81149700 | 0.95456200  | H | 5.06837600  | -0.22920200 | -2.53427600 |
| H | 3.61715900  | -5.47645100 | 0.34674400  | H | 3.87645700  | 0.63516900  | -1.53233100 |
| H | 3.61728700  | -4.35629300 | 1.72253400  | H | 0.53784200  | -3.63524000 | -2.33712600 |
| C | 5.32068300  | -2.17990400 | 0.85875700  | H | 1.77702700  | -4.89516500 | -2.47409400 |
| H | 5.18895900  | -2.82883200 | 1.72671100  | H | 0.85131100  | -4.69594200 | -0.97352400 |
| H | 6.29561400  | -2.40522400 | 0.41096100  | C | -2.01182300 | -0.28775800 | -0.12201800 |
| H | 5.33784100  | -1.14604000 | 1.21348100  | C | -0.88600000 | -1.10725200 | -0.08495200 |
| C | -3.59962700 | 5.09734400  | -1.07421300 | C | -1.06582800 | -2.57917800 | 0.11214700  |
| C | -2.57164800 | 4.28085100  | -1.55243200 | C | -1.80987700 | -3.28587900 | -0.84850800 |
| C | -1.47430000 | 3.96016600  | -0.74400900 | C | -0.56594300 | -3.28038300 | 1.21712200  |
| C | -1.42158500 | 4.47881000  | 0.55892000  | C | -2.03449000 | -4.65561900 | -0.72144600 |
| C | -2.44338200 | 5.30034700  | 1.03552100  | H | -2.21887100 | -2.74375200 | -1.69522300 |
| C | -3.53803600 | 5.60936500  | 0.22314600  | C | -0.78782900 | -4.65552300 | 1.34326000  |
| H | -4.44502000 | 5.33452600  | -1.71480400 | H | -0.01843200 | -2.74632300 | 1.98190400  |
| H | -2.62293500 | 3.88029400  | -2.56240600 | C | -1.51819100 | -5.34962900 | 0.37630500  |
| H | -0.57002000 | 4.23004900  | 1.18645000  | H | -2.61324700 | -5.17979900 | -1.47687900 |
| H | -2.38704400 | 5.69876600  | 2.04516400  | H | -0.40177900 | -5.17979900 | 2.21383100  |
| H | -4.33478200 | 6.24654900  | 0.59722900  | H | -1.69323800 | -6.41678200 | 0.48160400  |
| C | -0.39388700 | 3.01834600  | -1.21968200 | N | -3.25582600 | -0.87109500 | 0.19134000  |
| H | -0.29491900 | 3.06529000  | -2.31326600 | N | -4.24284400 | -0.09697000 | 0.01687600  |
| H | 0.57349000  | 3.31921200  | -0.81686600 | N | -5.43763300 | -0.58594000 | 0.38247900  |
| C | -0.62118900 | 1.57888700  | -0.80565300 | C | -6.56195300 | 0.22685100  | -0.11605000 |
| C | -1.84248400 | 1.08220400  | -0.45366400 | H | -7.46868800 | -0.27541700 | 0.22993600  |
| H | -2.71454100 | 1.72504500  | -0.43730300 | C | -6.52539200 | 1.63176000  | 0.50095000  |
| C | 0.54127800  | 0.70799300  | -0.79462300 | H | -5.62232100 | 2.16372400  | 0.19038600  |
| N | 0.35865600  | -0.59710100 | -0.33984500 | H | -6.52931500 | 1.57313800  | 1.59329300  |
| O | 1.67378100  | 1.10144600  | -1.16623300 | C | -6.59104300 | 0.28566200  | -1.65200900 |
| C | 2.74874300  | 3.47857400  | 0.78731300  | H | -5.68343800 | 0.77194400  | -2.02053800 |
| C | 3.16263400  | 4.77666800  | 0.08486300  | H | -6.64383800 | -0.71661300 | -2.08689300 |
| C | 4.49137100  | 5.26292700  | 0.70434800  | C | -5.57729000 | -1.98555800 | 0.82638800  |
| H | 4.82361900  | 6.17630300  | 0.19887400  | H | -4.65274500 | -2.18376200 | 1.37581400  |
| H | 4.36957400  | 5.49165000  | 1.76884600  | C | -6.75934500 | -2.16515900 | 1.78203900  |
| H | 5.27189700  | 4.50474900  | 0.60238300  | H | -6.73847600 | -1.41607300 | 2.57915900  |
| C | 2.07346300  | 5.84086200  | 0.27471500  | H | -6.70299600 | -3.15702900 | 2.24160500  |
| H | 2.38987900  | 6.78250200  | -0.18670100 | H | -7.72585700 | -2.10102900 | 1.27070100  |
| H | 1.12841400  | 5.53625900  | -0.18083400 | C | -5.62947300 | -2.96053000 | -0.35993000 |
| H | 1.88201800  | 6.02003300  | 1.33622400  | H | -4.76820200 | -2.80247200 | -1.01231500 |
| C | 3.37023100  | 4.47501400  | -1.41567800 | H | -5.60028400 | -3.99605700 | -0.00364300 |
| H | 3.62488500  | 5.39879300  | -1.94710800 | H | -6.54891700 | -2.82561400 | -0.94025600 |
| H | 4.17842500  | 3.75371700  | -1.55758100 | H | -7.45837400 | 0.85776700  | -1.99838800 |
| H | 2.46667500  | 4.05334900  | -1.86470800 | H | -7.39762400 | 2.21035600  | 0.17887700  |
| O | 1.71786700  | 3.34010700  | 1.43154500  | C | 2.03837600  | -0.27656100 | 2.34472500  |
| O | 3.64755200  | 2.50806800  | 0.62728800  | O | 1.59012700  | -1.45605400 | 2.26951400  |

|            |             |             |             |   |             |             |             |
|------------|-------------|-------------|-------------|---|-------------|-------------|-------------|
| O          | 2.71418700  | 0.15988300  | 1.34753100  | C | -1.40999900 | 2.07202800  | -0.12759600 |
| H          | 3.24419800  | 1.65246400  | 0.93891600  | N | -1.60404800 | 0.73965600  | -0.29232000 |
| C          | 1.79141700  | 0.62697800  | 3.51633800  | O | -2.15691600 | 2.94824400  | -0.59297400 |
| H          | 1.45345100  | 1.59371900  | 3.12991900  | C | -3.95304400 | 0.64702000  | -0.76953000 |
| H          | 1.05996200  | 0.18908600  | 4.19574700  | C | -4.95724900 | 0.66759600  | -1.92403900 |
| H          | 2.73343800  | 0.79554600  | 4.04888000  | C | -4.45588500 | 1.61237000  | -3.03584400 |
| <b>11e</b> |             |             |             |   |             |             |             |
| C          | -0.26501100 | -1.78758100 | 2.71970200  | H | -5.23414800 | 1.72996400  | -3.79731200 |
| C          | -0.74447100 | -0.43377800 | 2.90454900  | H | -4.20416300 | 2.59351900  | -2.62503800 |
| C          | -2.20622700 | -0.45401900 | 2.81566700  | H | -3.55870000 | 1.21795800  | -3.51846700 |
| C          | -2.59503300 | -1.73655500 | 2.41564300  | C | -6.30280100 | 1.16021200  | -1.36749200 |
| C          | -1.38152100 | -2.56466700 | 2.32435100  | H | -7.05242900 | 1.16174800  | -2.16524300 |
| Rh         | -1.09001200 | -0.91480100 | 0.81899400  | H | -6.65290900 | 0.51710700  | -0.55639000 |
| C          | -3.06044700 | 0.73970600  | 3.09840300  | H | -6.21238300 | 2.17610900  | -0.97317600 |
| C          | 0.05871600  | 0.66706100  | 3.52151600  | C | -5.10702300 | -0.77307300 | -2.46445700 |
| H          | 0.10839400  | 0.52192300  | 4.60941300  | H | -5.87377000 | -0.79126500 | -3.24599800 |
| H          | 1.07789300  | 0.67688300  | 3.13134000  | H | -4.17369200 | -1.13606600 | -2.90120800 |
| H          | -0.38669900 | 1.64267200  | 3.32686800  | H | -5.41463400 | -1.46213200 | -1.67046600 |
| C          | 1.15861500  | -2.20662800 | 2.94040700  | O | -4.22224900 | 0.70018800  | 0.40413500  |
| C          | -1.40878300 | -4.01676400 | 1.95564100  | O | -2.66844500 | 0.52374800  | -1.23982500 |
| H          | -0.43298000 | -4.48898100 | 2.08842700  | H | -4.11721200 | 0.52684400  | 2.94708000  |
| H          | -2.13309300 | -4.55328200 | 2.57847300  | H | -2.90558700 | 1.06498400  | 4.13441000  |
| H          | -1.70799300 | -4.13585800 | 0.90914800  | H | -2.80185900 | 1.56958300  | 2.43566600  |
| C          | -3.97722100 | -2.21988700 | 2.09506400  | H | 1.84077100  | -1.63251300 | 2.30401200  |
| H          | -3.95329500 | -2.90019500 | 1.23822800  | H | 1.44043400  | -2.03015800 | 3.98535800  |
| H          | -4.41924400 | -2.76520600 | 2.93893200  | H | 1.31001800  | -3.26741100 | 2.73040400  |
| H          | -4.62847700 | -1.38322400 | 1.83609600  | C | 1.43446900  | 0.52128200  | 0.10543400  |
| C          | 2.34051700  | 6.45590600  | 0.36493600  | C | 0.73353200  | -0.63657700 | -0.05370500 |
| C          | 1.63431700  | 5.48207600  | 1.07679500  | C | 1.25749400  | -1.74663300 | -0.88235200 |
| C          | 0.47336500  | 4.90805700  | 0.54744700  | C | 1.24334100  | -3.08936800 | -0.46119900 |
| C          | 0.02731100  | 5.32518600  | -0.71585300 | C | 1.73683400  | -1.48565000 | -2.18447100 |
| C          | 0.73024000  | 6.29746100  | -1.42532100 | C | 1.73880300  | -4.11299400 | -1.26774500 |
| C          | 1.88962900  | 6.86712500  | -0.88909400 | H | 0.84467500  | -3.32692900 | 0.51479600  |
| H          | 3.23962100  | 6.89201900  | 0.79250200  | C | 2.22346700  | -2.50775300 | -2.99732600 |
| H          | 1.98804400  | 5.16790000  | 2.05646000  | H | 1.73668600  | -0.46142400 | -2.54200600 |
| H          | -0.86720000 | 4.86568100  | -1.12566000 | C | 2.24102600  | -3.83030800 | -2.54034800 |
| H          | 0.37302600  | 6.61303700  | -2.40221000 | H | 1.73143400  | -5.13571800 | -0.89987400 |
| H          | 2.43512600  | 7.62480900  | -1.44509200 | H | 2.58790000  | -2.27105300 | -3.99350100 |
| C          | -0.28047900 | 3.83170800  | 1.30960300  | H | 2.62730300  | -4.62606400 | -3.17067700 |
| H          | 0.12174700  | 3.76772700  | 2.32739700  | N | 2.81792200  | 0.61204700  | -0.27994400 |
| H          | -1.33434000 | 4.11188900  | 1.38550500  | N | 3.52505200  | -0.28492800 | 0.26333100  |
| C          | -0.18962200 | 2.45834500  | 0.64866000  | N | 4.81423800  | -0.31831600 | -0.07364400 |
| C          | 0.99070500  | 1.79936300  | 0.66970400  | C | 5.54152300  | -1.47944800 | 0.47154900  |
| H          | 1.81271000  | 2.34824500  | 1.13235300  | H | 6.55071600  | -1.40990200 | 0.05474900  |
|            |             |             |             | C | 5.64214100  | -1.38389300 | 1.99856000  |

|              |             |             |             |   |             |             |             |
|--------------|-------------|-------------|-------------|---|-------------|-------------|-------------|
| H            | 4.64223600  | -1.40918000 | 2.44107100  | H | -4.51828800 | -2.07753300 | 3.05277400  |
| H            | 6.12705200  | -0.45020100 | 2.29878900  | H | -4.65031000 | -0.66523000 | 1.97158200  |
| C            | 4.91763100  | -2.80560500 | 0.01672600  | C | 3.07517200  | 6.43046300  | 0.43682600  |
| H            | 3.90867000  | -2.91011700 | 0.42115300  | C | 2.12056900  | 5.57699800  | 0.99802300  |
| H            | 4.83961800  | -2.85232700 | -1.07254200 | C | 1.19394900  | 4.91488000  | 0.18723300  |
| C            | 5.37396500  | 0.51641200  | -1.15445500 | C | 1.23764600  | 5.11011800  | -1.20150000 |
| H            | 4.62305300  | 1.29364100  | -1.30834500 | C | 2.18844900  | 5.96179800  | -1.76000400 |
| C            | 6.68388600  | 1.18263700  | -0.72102900 | C | 3.11007100  | 6.62573300  | -0.94351400 |
| H            | 6.54419200  | 1.74759000  | 0.20507300  | H | 3.78838500  | 6.93983700  | 1.07919200  |
| H            | 7.02028000  | 1.87545200  | -1.49912700 | H | 2.09465100  | 5.42844300  | 2.07521700  |
| H            | 7.48711800  | 0.45448800  | -0.56276700 | H | 0.53117100  | 4.57264600  | -1.82900100 |
| C            | 5.51751300  | -0.28928400 | -2.45329000 | H | 2.21321300  | 6.10700100  | -2.83654000 |
| H            | 4.56126500  | -0.74373500 | -2.72577400 | H | 3.85079700  | 7.28823300  | -1.38258900 |
| H            | 5.84165300  | 0.36303000  | -3.27108900 | C | 0.15852800  | 3.97715300  | 0.78583800  |
| H            | 6.26061700  | -1.08785800 | -2.34788900 | H | 0.24124600  | 3.98277400  | 1.87889500  |
| H            | 5.52435400  | -3.65013600 | 0.36088800  | H | -0.84718500 | 4.33385100  | 0.54146900  |
| H            | 6.22030900  | -2.22304900 | 2.39914700  | C | 0.31626900  | 2.55827200  | 0.26634500  |
| C            | -1.66315800 | -2.40710700 | -2.06161900 | C | 1.41315200  | 1.80266700  | 0.47447200  |
| O            | -1.78398700 | -2.36799500 | -0.83354200 | H | 2.26980700  | 2.29148700  | 0.93843600  |
| O            | -1.67106800 | -1.33859600 | -2.83771600 | C | -0.79042700 | 2.10736400  | -0.67961900 |
| H            | -1.91879400 | -0.54653000 | -2.29509900 | N | -1.46730300 | 1.24052800  | 0.08601100  |
| C            | -1.47072500 | -3.69117700 | -2.81258600 | O | -0.99573100 | 2.64310300  | -1.75707600 |
| H            | -2.08002300 | -3.70137300 | -3.71888100 | C | -4.35664500 | 0.95668300  | -0.59713200 |
| H            | -0.41726900 | -3.75040100 | -3.10416500 | C | -5.50821800 | 0.43443100  | -1.49322000 |
| H            | -1.70833600 | -4.53720900 | -2.16909600 | C | -5.28143700 | 0.78094300  | -2.97653300 |
| <b>TS12e</b> |             |             |             | H | -6.15605800 | 0.47160900  | -3.55939100 |
| C            | -0.32299500 | -1.53716600 | 2.67627600  | H | -5.14542000 | 1.85806200  | -3.11252500 |
| C            | -0.64046800 | -0.13815300 | 2.87556600  | H | -4.40622600 | 0.27312300  | -3.38606600 |
| C            | -2.09432400 | 0.00874600  | 2.83824500  | C | -6.81817600 | 1.07138900  | -0.99715100 |
| C            | -2.63603900 | -1.22657200 | 2.44857400  | H | -7.66362000 | 0.67516400  | -1.56989900 |
| C            | -1.53509500 | -2.18831300 | 2.33789900  | H | -6.97647200 | 0.86196600  | 0.06264800  |
| Rh           | -1.11888400 | -0.53621100 | 0.77738000  | H | -6.79810200 | 2.15833100  | -1.12366600 |
| C            | -2.80676700 | 1.29842900  | 3.08333000  | C | -5.58240300 | -1.09823900 | -1.31294700 |
| C            | 0.31692300  | 0.88359400  | 3.40234100  | H | -6.40455200 | -1.49876500 | -1.91606300 |
| H            | 0.39725200  | 0.79734800  | 4.49405300  | H | -4.65954900 | -1.58312600 | -1.63703800 |
| H            | 1.31242100  | 0.74342800  | 2.97622900  | H | -5.76530600 | -1.36066400 | -0.26718900 |
| H            | -0.01432800 | 1.89540900  | 3.16451600  | O | -4.53986900 | 1.29213400  | 0.55974800  |
| C            | 1.04636800  | -2.12339300 | 2.85524200  | O | -3.15632100 | 1.04131700  | -1.17130200 |
| C            | -1.73904200 | -3.62312700 | 1.96436600  | H | -3.88607500 | 1.15903000  | 3.12406400  |
| H            | -0.84716800 | -4.22490900 | 2.15254300  | H | -2.46435500 | 1.74591800  | 4.02303800  |
| H            | -2.56750200 | -4.05199700 | 2.53750000  | H | -2.60837500 | 1.99695800  | 2.26366400  |
| H            | -1.98923100 | -3.69442000 | 0.89925200  | H | 1.77153500  | -1.66359200 | 2.17563500  |
| C            | -4.07213500 | -1.56351900 | 2.19168900  | H | 1.38981600  | -1.95361600 | 3.88262700  |
| H            | -4.15120000 | -2.23054600 | 1.32857200  | H | 1.05288000  | -3.20054000 | 2.67654700  |

|   |             |             |             |            |             |             |             |
|---|-------------|-------------|-------------|------------|-------------|-------------|-------------|
| C | 1.64655500  | 0.43507300  | 0.02440900  | <b>13e</b> |             |             |             |
| C | 0.72259000  | -0.55811700 | -0.14464200 | C          | -0.03010400 | -0.46687700 | 2.79469500  |
| C | 1.04592700  | -1.73932400 | -0.97460400 | C          | -0.51957200 | 0.85235200  | 2.53626700  |
| C | 0.84895900  | -3.06243100 | -0.54457700 | C          | -1.98500900 | 0.78335800  | 2.41852800  |
| C | 1.55041600  | -1.54384100 | -2.27708100 | C          | -2.36807300 | -0.55803000 | 2.49819500  |
| C | 1.19615100  | -4.14500200 | -1.35002500 | C          | -1.14878600 | -1.35924400 | 2.64321900  |
| H | 0.42648200  | -3.23708700 | 0.43381600  | Rh         | -0.83166600 | -0.36509200 | 0.72504200  |
| C | 1.88714800  | -2.62499200 | -3.08988900 | C          | -2.86312000 | 1.97745100  | 2.21573300  |
| H | 1.68617800  | -0.52924600 | -2.63642700 | C          | 0.27843600  | 2.10947100  | 2.69493400  |
| C | 1.72537800  | -3.93460900 | -2.62587500 | H          | 0.30977800  | 2.41101400  | 3.75036200  |
| H | 1.04976000  | -5.15660600 | -0.98122200 | H          | 1.30434800  | 1.97356000  | 2.34655800  |
| H | 2.27273900  | -2.44411300 | -4.08949900 | H          | -0.15829900 | 2.93195500  | 2.12686700  |
| H | 1.99173600  | -4.77787800 | -3.25643900 | C          | 1.38561900  | -0.80797400 | 3.15315200  |
| N | 3.03153600  | 0.23362100  | -0.29402200 | C          | -1.18337700 | -2.84628900 | 2.82314400  |
| N | 3.51403000  | -0.77740000 | 0.29809300  | H          | -0.22151300 | -3.24404800 | 3.15249600  |
| N | 4.77299100  | -1.09205500 | 0.01559500  | H          | -1.93363600 | -3.11559700 | 3.57459600  |
| C | 5.24543900  | -2.32900600 | 0.66607100  | H          | -1.45617000 | -3.33061700 | 1.87979700  |
| H | 6.25979000  | -2.48439400 | 0.28729000  | C          | -3.73981600 | -1.15263300 | 2.44407600  |
| C | 5.32076000  | -2.14547200 | 2.18658300  | H          | -3.80139200 | -1.89541700 | 1.64290000  |
| H | 4.32236600  | -1.95702600 | 2.59159700  | H          | -3.96617900 | -1.66208700 | 3.38943700  |
| H | 5.96226700  | -1.29791300 | 2.44558200  | H          | -4.50249500 | -0.39639300 | 2.26406100  |
| C | 4.38816300  | -3.53809100 | 0.27157100  | C          | 2.18518800  | 6.21456400  | 0.71389000  |
| H | 3.36721100  | -3.41578500 | 0.63845000  | C          | 1.12032100  | 5.32527900  | 0.55887900  |
| H | 4.33435800  | -3.64635700 | -0.81489700 | C          | 0.89194700  | 4.69012800  | -0.66724700 |
| C | 5.53891300  | -0.43556100 | -1.06336700 | C          | 1.75241900  | 4.96310200  | -1.73895900 |
| H | 4.94736900  | 0.44682400  | -1.31345900 | C          | 2.81824000  | 5.84986100  | -1.58782700 |
| C | 6.91441500  | 0.02311000  | -0.56792300 | C          | 3.03764000  | 6.47826600  | -0.35952700 |
| H | 6.81555100  | 0.66720100  | 0.31051600  | H          | 2.34651200  | 6.70207300  | 1.67108800  |
| H | 7.41983900  | 0.59095100  | -1.35565900 | H          | 0.45697400  | 5.12604900  | 1.39646200  |
| H | 7.56243100  | -0.82037600 | -0.30589500 | H          | 1.58716800  | 4.46971300  | -2.69341100 |
| C | 5.61993700  | -1.33951500 | -2.30138800 | H          | 3.47584500  | 6.05184700  | -2.42843800 |
| H | 4.61768600  | -1.63099700 | -2.62731500 | H          | 3.86608800  | 7.17063300  | -0.24141100 |
| H | 6.11456000  | -0.81003600 | -3.12240000 | C          | -0.23854500 | 3.70126800  | -0.82811800 |
| H | 6.19533400  | -2.24945600 | -2.09726500 | H          | -1.02982500 | 3.91317000  | -0.09504200 |
| H | 4.80799400  | -4.45635200 | 0.69575400  | H          | -0.70863300 | 3.84025200  | -1.81381800 |
| H | 5.72280000  | -3.04598600 | 2.66202000  | C          | 0.16707100  | 2.24811700  | -0.68709300 |
| C | -2.09251300 | -1.80322200 | -1.96072300 | C          | 1.40352700  | 1.79335300  | -0.43049200 |
| O | -1.91399400 | -1.89995300 | -0.70264200 | H          | 2.19005300  | 2.53528500  | -0.34975100 |
| O | -2.33019800 | -0.73835800 | -2.59635600 | C          | -1.85427200 | 1.50617400  | -1.61180500 |
| H | -2.80135200 | 0.26534400  | -1.85818400 | N          | -0.91314600 | 1.30342000  | -0.83221100 |
| C | -2.00344700 | -3.09118200 | -2.75065600 | O          | -2.73624200 | 1.72074600  | -2.34279100 |
| H | -2.55794100 | -3.00468500 | -3.68596300 | C          | -5.33555000 | 0.36211100  | -0.20073900 |
| H | -0.94835700 | -3.27455300 | -2.97512000 | C          | -6.17419800 | -0.32476200 | -1.29308300 |
| H | -2.36906300 | -3.93043300 | -2.15576100 | C          | -5.72309000 | 0.16563900  | -2.68651600 |

|   |             |             |             |             |             |             |             |
|---|-------------|-------------|-------------|-------------|-------------|-------------|-------------|
| H | -6.36602600 | -0.28142000 | -3.45273700 | H           | 5.06189700  | 0.36271600  | -1.86304700 |
| H | -5.81046800 | 1.25415200  | -2.76576100 | C           | 7.10946100  | 0.20900600  | -1.24054700 |
| H | -4.69186900 | -0.11586000 | -2.90559200 | H           | 7.05859900  | 1.05202100  | -0.54548400 |
| C | -7.65282100 | 0.02132200  | -1.06517300 | H           | 7.50383900  | 0.57191700  | -2.19529900 |
| H | -8.27022800 | -0.46611900 | -1.82720600 | H           | 7.82750400  | -0.51874100 | -0.84725500 |
| H | -7.98669000 | -0.30794700 | -0.07790200 | C           | 5.74072300  | -1.59823600 | -2.42021500 |
| H | -7.81435100 | 1.10102000  | -1.12179600 | H           | 4.73233000  | -2.00224300 | -2.54519400 |
| C | -5.96878700 | -1.85311400 | -1.18170200 | H           | 6.11884300  | -1.28820900 | -3.40020800 |
| H | -6.61114900 | -2.36264500 | -1.90794400 | H           | 6.38915900  | -2.40020400 | -2.05020900 |
| H | -4.93563800 | -2.13603200 | -1.39449200 | H           | 5.44413100  | -3.85500700 | 1.31040600  |
| H | -6.23648500 | -2.21443100 | -0.18261100 | H           | 6.31529300  | -1.93941500 | 2.80836700  |
| O | -5.82946500 | 1.01187200  | 0.70669000  | C           | -2.06272700 | -2.10963200 | -1.50021900 |
| O | -4.00987800 | 0.20754900  | -0.24146400 | O           | -1.48672900 | -2.08057400 | -0.36133100 |
| H | -3.86385900 | 1.70183400  | 1.88131600  | O           | -2.72547300 | -1.16886200 | -2.00670600 |
| H | -2.93741100 | 2.55305400  | 3.14726800  | H           | -3.62038100 | -0.35788800 | -0.97959800 |
| H | -2.43315000 | 2.64279900  | 1.45966200  | C           | -1.89269500 | -3.41018400 | -2.26556400 |
| H | 2.08303300  | -0.49458700 | 2.36935400  | H           | -2.49995900 | -3.41184800 | -3.17146300 |
| H | 1.66446000  | -0.30331700 | 4.08548000  | H           | -0.83402900 | -3.52619900 | -2.51940300 |
| H | 1.51630100  | -1.88185600 | 3.30111700  | H           | -2.16278500 | -4.25413400 | -1.62465900 |
| C | 1.82503000  | 0.39502000  | -0.36178300 | <b>TS14</b> |             |             |             |
| C | 1.01627900  | -0.67470800 | -0.11490200 | C           | -1.22118200 | -1.06419400 | -2.56432400 |
| C | 1.40090800  | -2.04369500 | -0.50902400 | C           | -1.26261500 | -2.27064700 | -1.81901700 |
| C | 1.26876100  | -3.15748800 | 0.33453700  | C           | -2.64216100 | -2.50310200 | -1.35485400 |
| C | 1.85061300  | -2.27716700 | -1.82599800 | C           | -3.40771200 | -1.39881700 | -1.72247200 |
| C | 1.59178700  | -4.44163000 | -0.09851800 | C           | -2.51737400 | -0.43175800 | -2.39240500 |
| H | 0.90846700  | -3.00721300 | 1.34089500  | Rh          | -1.64455000 | -0.54317200 | -0.48470300 |
| C | 2.17099500  | -3.56066800 | -2.26471500 | C           | -3.11559100 | -3.68643000 | -0.57035500 |
| H | 1.95128500  | -1.43235400 | -2.50002200 | C           | -0.14505300 | -3.25170300 | -1.67224500 |
| C | 2.04606300  | -4.65415000 | -1.40176800 | H           | -0.20947000 | -4.01588300 | -2.45776400 |
| H | 1.48501800  | -5.28041000 | 0.58437100  | H           | 0.82946400  | -2.76776300 | -1.73843200 |
| H | 2.51234900  | -3.70853500 | -3.28607800 | H           | -0.19823600 | -3.76185400 | -0.70888500 |
| H | 2.29131100  | -5.65555300 | -1.74340500 | C           | -0.06688000 | -0.54812900 | -3.36594700 |
| N | 3.20926100  | 0.25376500  | -0.70048800 | C           | -2.95788800 | 0.85647300  | -3.01105700 |
| N | 3.82174500  | -0.50555900 | 0.10704700  | H           | -2.11856200 | 1.54106800  | -3.14288100 |
| N | 5.09550600  | -0.77520600 | -0.17043100 | H           | -3.41629900 | 0.66783400  | -3.99062900 |
| C | 5.69894100  | -1.77745500 | 0.72961300  | H           | -3.69439200 | 1.36073400  | -2.38154200 |
| H | 6.70313700  | -1.95436000 | 0.33338200  | C           | -4.85768000 | -1.17814300 | -1.43098800 |
| C | 5.83132900  | -1.21192300 | 2.14863600  | H           | -5.09821500 | -0.11297700 | -1.41082900 |
| H | 4.84068300  | -0.98359700 | 2.55215000  | H           | -5.47662400 | -1.64470500 | -2.20780700 |
| H | 6.42330100  | -0.29171500 | 2.14870400  | H           | -5.12385400 | -1.60184000 | -0.46130100 |
| C | 4.92433300  | -3.10176400 | 0.70872200  | C           | 4.07013100  | -4.73679900 | -0.83602700 |
| H | 3.91999800  | -2.96089600 | 1.11267900  | C           | 2.89931800  | -4.38452700 | -0.15895300 |
| H | 4.81540300  | -3.48259900 | -0.30998300 | C           | 2.91469200  | -3.40576300 | 0.84062200  |
| C | 5.72211500  | -0.40441900 | -1.45469300 | C           | 4.13525000  | -2.78899800 | 1.15454700  |

|   |             |             |             |           |             |             |             |
|---|-------------|-------------|-------------|-----------|-------------|-------------|-------------|
| C | 5.30590300  | -3.13747000 | 0.48283400  | H         | 0.91773900  | 2.27053300  | -2.43881100 |
| C | 5.27639000  | -4.11257900 | -0.51858700 | C         | -1.98630800 | 4.17390700  | -0.73820000 |
| H | 4.03777600  | -5.50068200 | -1.60788100 | H         | -2.07794200 | 2.49655600  | 0.61659800  |
| H | 1.96534700  | -4.88199500 | -0.40537400 | C         | -1.36597300 | 4.72614000  | -1.86136800 |
| H | 4.15900300  | -2.02159700 | 1.92340400  | H         | 0.17919700  | 4.45135200  | -3.34333600 |
| H | 6.24039500  | -2.64734700 | 0.73958400  | H         | -2.79126000 | 4.71082400  | -0.24271400 |
| H | 6.18793100  | -4.38478100 | -1.04269500 | H         | -1.68670000 | 5.68866200  | -2.25002300 |
| C | 1.65456700  | -3.00510300 | 1.57331100  | N         | 2.09943700  | 1.55748900  | -0.13295300 |
| H | 0.85802300  | -3.74069500 | 1.39986900  | N         | 3.26451800  | 1.16966000  | 0.17940500  |
| H | 1.83459800  | -3.02682200 | 2.65674700  | N         | 4.22528500  | 2.10338400  | 0.10966200  |
| C | 1.11980600  | -1.62354500 | 1.23793700  | C         | 5.47547900  | 1.68492600  | 0.77048000  |
| C | 1.58436900  | -0.83225100 | 0.25691400  | H         | 6.13094700  | 2.55913500  | 0.74727300  |
| H | 2.45654200  | -1.19194000 | -0.27887500 | C         | 5.24787200  | 1.29001200  | 2.23816300  |
| C | -0.28943200 | -0.31250100 | 2.75230200  | H         | 4.58041700  | 0.42567900  | 2.29296200  |
| N | 0.04672900  | -1.26415800 | 2.07840200  | H         | 4.78922900  | 2.10843100  | 2.80004100  |
| O | -0.70223100 | 0.51809800  | 3.47418800  | C         | 6.14192700  | 0.55538300  | -0.02524700 |
| C | -3.60724300 | -0.19078600 | 1.63778000  | H         | 5.48394400  | -0.31660800 | -0.06086100 |
| C | -4.54329900 | 0.76975900  | 2.40625400  | H         | 6.34598200  | 0.87357100  | -1.05193900 |
| C | -5.60533400 | -0.03577800 | 3.16651900  | C         | 3.89509500  | 3.51844000  | -0.15651600 |
| H | -6.28904700 | 0.64160500  | 3.69086200  | H         | 3.03069400  | 3.47260400  | -0.82297400 |
| H | -6.18532900 | -0.66233600 | 2.48406600  | C         | 3.46232400  | 4.24451200  | 1.12495300  |
| H | -5.13956800 | -0.69682400 | 3.90283900  | H         | 2.63386200  | 3.71135500  | 1.59786500  |
| C | -5.22043700 | 1.67441600  | 1.35212800  | H         | 3.12809500  | 5.26165200  | 0.89425900  |
| H | -5.88583800 | 2.39437600  | 1.84182800  | H         | 4.29330800  | 4.31423100  | 1.83589500  |
| H | -4.47317700 | 2.22706500  | 0.77589100  | C         | 5.03310200  | 4.23625600  | -0.88671100 |
| H | -5.82350800 | 1.08070300  | 0.65529000  | H         | 5.36126900  | 3.66573400  | -1.76085700 |
| C | -3.73066800 | 1.63794900  | 3.38481200  | H         | 4.68173800  | 5.21539500  | -1.22729100 |
| H | -4.39691100 | 2.33570200  | 3.90545600  | H         | 5.90124900  | 4.41194600  | -0.24247500 |
| H | -3.22599700 | 1.02094800  | 4.13347900  | H         | 7.08755300  | 0.26067100  | 0.44268700  |
| H | -2.96193100 | 2.20985000  | 2.86176000  | H         | 6.19810800  | 1.03134800  | 2.71709800  |
| O | -2.59165000 | 0.41321500  | 1.07319300  | <b>15</b> |             |             |             |
| O | -3.84842500 | -1.39723700 | 1.54988600  | C         | 1.81330600  | -0.02381200 | -2.77086900 |
| H | -3.75931000 | -3.35689800 | 0.24712900  | C         | 1.80675700  | 1.34028000  | -2.33939000 |
| H | -3.67270100 | -4.37991800 | -1.21266300 | C         | 2.94138800  | 1.55754100  | -1.44864700 |
| H | -2.27835600 | -4.23752800 | -0.13606600 | C         | 3.56409300  | 0.31658600  | -1.25107000 |
| H | 0.88334800  | -0.75165700 | -2.86698100 | C         | 2.85369500  | -0.69800800 | -2.02970500 |
| H | -0.04833200 | -1.02453500 | -4.35383100 | Rh        | 1.36813000  | -0.01865300 | -0.60889100 |
| H | -0.13952800 | 0.53019700  | -3.50975100 | C         | 3.36300100  | 2.84550700  | -0.80996000 |
| C | 1.12346600  | 0.52913800  | -0.09003700 | C         | 0.90583500  | 2.42282700  | -2.85383800 |
| C | -0.16176100 | 0.86069800  | -0.39379700 | H         | 1.38392700  | 2.94197600  | -3.69409100 |
| C | -0.54027900 | 2.21508600  | -0.85389000 | H         | -0.04280800 | 2.01688100  | -3.21257800 |
| C | 0.08969000  | 2.79479500  | -1.97485600 | H         | 0.68907700  | 3.16730400  | -2.08442000 |
| C | -1.58528200 | 2.93347400  | -0.24234000 | C         | 0.92696000  | -0.64328000 | -3.80811200 |
| C | -0.32143800 | 4.02981700  | -2.47528500 | C         | 3.29710000  | -2.11481100 | -2.22131400 |

|   |             |             |             |             |             |             |             |
|---|-------------|-------------|-------------|-------------|-------------|-------------|-------------|
| H | 2.45970800  | -2.76001000 | -2.49168300 | H           | 4.40107600  | 3.08532800  | -1.06860000 |
| H | 4.05411300  | -2.17819500 | -3.01415700 | H           | 2.73602100  | 3.67664400  | -1.13478200 |
| H | 3.73494100  | -2.51747400 | -1.30522200 | H           | -0.04059000 | -0.13810200 | -3.85594500 |
| C | 4.75124100  | 0.06520500  | -0.37630300 | H           | 1.39206800  | -0.58111000 | -4.79983000 |
| H | 4.76935400  | -0.96769100 | -0.02299400 | H           | 0.73500700  | -1.69520000 | -3.58617200 |
| H | 5.67964500  | 0.24516200  | -0.93342000 | C           | -1.26747300 | -0.52612900 | -0.54687800 |
| H | 4.72963000  | 0.71973700  | 0.49665900  | C           | -0.19662700 | -1.31515600 | -0.76595800 |
| C | 0.37401600  | 5.72078800  | -0.51644000 | C           | -0.13455500 | -2.74247200 | -1.05641700 |
| C | 0.60841800  | 4.64963200  | 0.35021200  | C           | -1.00118500 | -3.33557400 | -1.99550800 |
| C | -0.40156700 | 3.72639200  | 0.64144500  | C           | 0.81340100  | -3.55474500 | -0.40319600 |
| C | -1.66854900 | 3.91891700  | 0.06862000  | C           | -0.91604300 | -4.69860000 | -2.27634500 |
| C | -1.90640300 | 4.98345600  | -0.79966000 | H           | -1.73975600 | -2.71454200 | -2.49136100 |
| C | -0.88209200 | 5.88583500  | -1.10138200 | C           | 0.88500500  | -4.91817100 | -0.67986400 |
| H | 1.17385900  | 6.42331100  | -0.73371700 | H           | 1.46979600  | -3.09307600 | 0.32689200  |
| H | 1.58582400  | 4.52465200  | 0.80522400  | C           | 0.02694200  | -5.49503700 | -1.62116700 |
| H | -2.46455200 | 3.21439200  | 0.29368300  | H           | -1.58764600 | -5.14097700 | -3.00743100 |
| H | -2.89172400 | 5.10988900  | -1.23970900 | H           | 1.61406300  | -5.53457300 | -0.16058700 |
| H | -1.06532000 | 6.71410600  | -1.77976800 | H           | 0.09108300  | -6.55711400 | -1.84081800 |
| C | -0.14064600 | 2.58022200  | 1.59199000  | N           | -2.60179600 | -0.94570700 | -0.47210500 |
| H | 0.92042400  | 2.51951500  | 1.85702400  | N           | -3.38111200 | -0.00819500 | -0.11074600 |
| H | -0.68280400 | 2.75024300  | 2.53156300  | N           | -4.67005700 | -0.33660800 | 0.02519300  |
| C | -0.54193400 | 1.20309100  | 1.10987900  | C           | -5.44570200 | 0.69851500  | 0.73721200  |
| C | -0.81452600 | 0.85653700  | -0.19302300 | H           | -6.44045000 | 0.27257000  | 0.88754800  |
| H | -0.88205800 | 1.65574300  | -0.92054900 | C           | -4.84520800 | 1.02449300  | 2.11431600  |
| C | -0.93808400 | -0.89033500 | 2.23216500  | H           | -3.84707400 | 1.45602000  | 2.00127800  |
| N | -0.70030100 | 0.30652100  | 2.15823800  | H           | -4.75600700 | 0.12358100  | 2.72769000  |
| O | -1.19191300 | -2.00147000 | 2.50930200  | C           | -5.58494400 | 1.95074800  | -0.13736400 |
| C | 2.46597100  | -0.19170500 | 2.08057900  | H           | -4.59745300 | 2.36537300  | -0.35832000 |
| C | 2.98682500  | -0.97561000 | 3.31032400  | H           | -6.07216700 | 1.70841500  | -1.08640500 |
| C | 3.68674500  | -0.01549200 | 4.28132700  | C           | -5.10409700 | -1.74777500 | -0.05725600 |
| H | 4.07049100  | -0.56770700 | 5.14684700  | H           | -4.45862600 | -2.18245100 | -0.82405600 |
| H | 4.52039300  | 0.49722700  | 3.79429800  | C           | -4.84179800 | -2.49311300 | 1.25974700  |
| H | 2.99466700  | 0.75263000  | 4.63737300  | H           | -3.79270300 | -2.40079300 | 1.55153100  |
| C | 3.98244700  | -2.04256100 | 2.80920400  | H           | -5.07120800 | -3.55774700 | 1.14424900  |
| H | 4.35292900  | -2.64148800 | 3.64890600  | H           | -5.47228100 | -2.09873600 | 2.06443500  |
| H | 3.50140400  | -2.71035500 | 2.08953700  | C           | -6.55672800 | -1.86576400 | -0.52471000 |
| H | 4.84751300  | -1.57689500 | 2.32394000  | H           | -6.73226800 | -1.26726200 | -1.42374300 |
| C | 1.80203300  | -1.66902800 | 4.00902300  | H           | -6.77395400 | -2.91212100 | -0.76082400 |
| H | 2.15431600  | -2.23425600 | 4.87950400  | H           | -7.27179700 | -1.55471700 | 0.24421700  |
| H | 1.07216000  | -0.93159100 | 4.36039100  | H           | -6.17700200 | 2.71536900  | 0.37583600  |
| H | 1.29282600  | -2.35487700 | 3.32953000  | H           | -5.47808200 | 1.74305900  | 2.64531600  |
| O | 1.81546900  | -0.93056300 | 1.22884400  | <b>TS16</b> |             |             |             |
| O | 2.69150500  | 1.01981200  | 1.95116200  | C           | 0.69496100  | -2.07436200 | 1.78738300  |
| H | 3.29641300  | 2.75865400  | 0.27927000  | C           | 1.13741800  | -3.02860000 | 0.82664900  |



|    |             |             |             |   |             |             |             |
|----|-------------|-------------|-------------|---|-------------|-------------|-------------|
| C  | 2.59992500  | -2.99770200 | 0.78276900  | C | 5.18443800  | 2.35319500  | 0.48217900  |
| C  | 3.04221100  | -2.00178100 | 1.67096300  | H | 5.82314400  | 3.23276400  | 0.33980200  |
| C  | 1.86272000  | -1.34362500 | 2.23170200  | H | 4.17944100  | 2.68667400  | 0.74806100  |
| Rh | 1.71525200  | -0.94649200 | 0.15172800  | H | 5.59306200  | 1.77772800  | 1.32227700  |
| C  | 3.47565500  | -3.81949700 | -0.11105500 | C | 4.53608000  | 2.33166400  | -1.95219300 |
| C  | 0.28945400  | -4.02095800 | 0.09185700  | H | 5.13987000  | 3.22731200  | -2.14139200 |
| H  | 0.45145200  | -5.02864700 | 0.49300900  | H | 4.49909100  | 1.74485500  | -2.87650400 |
| H  | -0.76925800 | -3.77819000 | 0.18475100  | H | 3.51992100  | 2.64201000  | -1.70112200 |
| H  | 0.53440000  | -4.03804200 | -0.97319900 | O | 3.10854000  | 0.57479500  | -0.03651300 |
| C  | -0.68445500 | -1.90293200 | 2.34066700  | O | 4.60881600  | -0.86214100 | -0.93493800 |
| C  | 1.90072500  | -0.28013200 | 3.28457300  | H | 4.11554800  | -3.14853000 | -0.69233000 |
| H  | 0.93404200  | 0.21933000  | 3.37569800  | H | 4.11266700  | -4.49031300 | 0.47695600  |
| H  | 2.15713000  | -0.71077600 | 4.26090100  | H | 2.88628300  | -4.42901500 | -0.79920800 |
| H  | 2.65174300  | 0.47428000  | 3.03751100  | H | -1.44300500 | -2.32570500 | 1.68282700  |
| C  | 4.45391800  | -1.63606900 | 1.99769900  | H | -0.74600400 | -2.40712200 | 3.31343600  |
| H  | 4.55786000  | -0.55205600 | 2.08818400  | H | -0.92850100 | -0.84909700 | 2.48827500  |
| H  | 4.73962200  | -2.08493300 | 2.95781600  | C | -1.13451500 | 0.30833600  | -0.09641500 |
| H  | 5.13865900  | -1.96914500 | 1.21961500  | C | 0.22882500  | 0.48458000  | -0.22929900 |
| C  | -5.34774900 | -3.53844200 | 0.52190000  | C | 0.71323900  | 1.88616800  | -0.31838200 |
| C  | -4.13819000 | -3.58504800 | -0.17483100 | C | 1.17630600  | 2.59229000  | 0.80268100  |
| C  | -3.91512800 | -2.75846500 | -1.28255700 | C | 0.65353000  | 2.55650600  | -1.54897300 |
| C  | -4.93501500 | -1.88484700 | -1.68322500 | C | 1.54567100  | 3.93108600  | 0.70176300  |
| C  | -6.14647200 | -1.83688400 | -0.99367900 | H | 1.23537400  | 2.08285400  | 1.75803200  |
| C  | -6.35525000 | -2.66217400 | 0.11465200  | C | 1.03253900  | 3.89646200  | -1.65498400 |
| H  | -5.50333300 | -4.18666100 | 1.37971500  | H | 0.29975700  | 2.01894500  | -2.42384500 |
| H  | -3.35526100 | -4.26941500 | 0.14461200  | C | 1.47670600  | 4.59130600  | -0.52926900 |
| H  | -4.76887700 | -1.23085600 | -2.53538100 | H | 1.89374700  | 4.46182400  | 1.58414000  |
| H  | -6.92478500 | -1.15168800 | -1.31701400 | H | 0.98021100  | 4.39578700  | -2.61869900 |
| H  | -7.29688100 | -2.62326100 | 0.65453300  | H | 1.77251800  | 5.63347800  | -0.60931800 |
| C  | -2.57978700 | -2.75110100 | -1.98633800 | N | -1.85072800 | 1.46849500  | 0.29899500  |
| H  | -2.10504300 | -3.73807300 | -1.91028500 | N | -3.11544700 | 1.36194200  | 0.22484800  |
| H  | -2.70996200 | -2.56967600 | -3.06092500 | N | -3.79645700 | 2.42206800  | 0.64249000  |
| C  | -1.60404100 | -1.70406900 | -1.47125800 | C | -5.24290900 | 2.33953100  | 0.35899600  |
| C  | -1.88504000 | -0.88438400 | -0.42462500 | H | -5.66166100 | 3.29840400  | 0.67053800  |
| H  | -2.86531600 | -0.97665600 | 0.02158900  | C | -5.51006300 | 2.15577900  | -1.14234100 |
| C  | 0.60874000  | -1.03939900 | -1.92229400 | H | -5.09860000 | 1.20088700  | -1.47933200 |
| N  | -0.44967300 | -1.64703000 | -2.22460000 | H | -5.04546700 | 2.95733200  | -1.72419400 |
| O  | 1.79667900  | -0.90445900 | -2.14748400 | C | -5.89135700 | 1.22775700  | 1.19390800  |
| C  | 4.25035600  | 0.26696000  | -0.59344800 | H | -5.47939500 | 0.25500800  | 0.91406500  |
| C  | 5.15447800  | 1.50650000  | -0.80447500 | H | -5.71258200 | 1.38896300  | 2.26134100  |
| C  | 6.57125300  | 1.04974900  | -1.17721100 | C | -3.09796200 | 3.66135600  | 1.05511600  |
| H  | 7.21263700  | 1.92048700  | -1.35624200 | H | -2.20065900 | 3.30592900  | 1.56954000  |
| H  | 7.01600000  | 0.45289400  | -0.37439000 | C | -2.64056700 | 4.47050300  | -0.16699000 |
| H  | 6.55605100  | 0.42971500  | -2.07633800 | H | -2.00678200 | 3.85852700  | -0.81187400 |

|           |             |             |             |   |             |             |             |
|-----------|-------------|-------------|-------------|---|-------------|-------------|-------------|
| H         | -2.05263300 | 5.33646500  | 0.15424500  | C | -2.35299600 | 0.51687800  | -1.04211200 |
| H         | -3.50177400 | 4.83343000  | -0.73965600 | H | -3.27165000 | 1.00246000  | -0.73501300 |
| C         | -3.92972900 | 4.49087700  | 2.03494100  | C | -0.09986700 | -0.90251600 | -1.74728000 |
| H         | -4.32002100 | 3.87522700  | 2.85131400  | N | -1.31917300 | -1.34377300 | -2.18292200 |
| H         | -3.29265000 | 5.26760800  | 2.46875100  | O | 0.92109800  | -1.68128400 | -1.78116300 |
| H         | -4.76974700 | 4.99827900  | 1.54908000  | C | 3.73305700  | -1.22242300 | -0.09142700 |
| H         | -6.97280000 | 1.20496500  | 1.02262600  | C | 5.07916800  | -0.50096300 | -0.35383100 |
| H         | -6.58720500 | 2.16338300  | -1.33973700 | C | 6.23688900  | -1.48284200 | -0.12396900 |
| <b>17</b> |             |             |             | H | 7.19355300  | -0.99929100 | -0.35387300 |
| C         | -0.79105600 | -1.40209300 | 1.87612100  | H | 6.26557600  | -1.82073200 | 0.91765400  |
| C         | -0.56313600 | -2.68368700 | 1.28456400  | H | 6.12454800  | -2.36800500 | -0.75319100 |
| C         | 0.80442200  | -3.07446400 | 1.56269000  | C | 5.22583400  | 0.71880700  | 0.57355600  |
| C         | 1.41627200  | -2.01906400 | 2.31035100  | H | 6.18009700  | 1.22506100  | 0.38468500  |
| C         | 0.45117500  | -0.94987400 | 2.46019500  | H | 4.41348400  | 1.42881600  | 0.41144800  |
| Rh        | 0.84457700  | -1.20090800 | 0.35511300  | H | 5.21249400  | 0.41486500  | 1.62759800  |
| C         | 1.45023900  | -4.35900400 | 1.15266400  | C | 5.05550600  | -0.03917100 | -1.82512600 |
| C         | -1.55341000 | -3.52515100 | 0.54016400  | H | 5.98521100  | 0.48683100  | -2.07402600 |
| H         | -1.59811300 | -4.53068100 | 0.97158400  | H | 4.95668300  | -0.89727200 | -2.49820800 |
| H         | -2.55570400 | -3.10023500 | 0.57458700  | H | 4.21606300  | 0.63377900  | -2.00355300 |
| H         | -1.27010300 | -3.61894400 | -0.51215200 | O | 2.73991700  | -0.39821200 | 0.10220400  |
| C         | -2.09827000 | -0.68358000 | 1.96676400  | O | 3.66579400  | -2.45334200 | -0.08578700 |
| C         | 0.66555800  | 0.33398400  | 3.20195000  | H | 2.45051000  | -4.15670600 | 0.76525700  |
| H         | 0.03106100  | 1.12408500  | 2.79255600  | H | 1.51885700  | -5.04571400 | 2.00598600  |
| H         | 0.43434300  | 0.22389000  | 4.26928300  | H | 0.87235700  | -4.84722700 | 0.36511700  |
| H         | 1.70393700  | 0.66145100  | 3.11067100  | H | -2.76125700 | -0.94082200 | 1.14044800  |
| C         | 2.80092800  | -2.01042000 | 2.87290200  | H | -2.59798600 | -0.96151600 | 2.90351100  |
| H         | 3.24851700  | -1.01820600 | 2.77812400  | H | -1.95984800 | 0.39960100  | 1.96591400  |
| H         | 2.76572400  | -2.27042800 | 3.93841200  | C | -1.13294300 | 1.06617400  | -0.68800600 |
| H         | 3.44200100  | -2.71538800 | 2.34613800  | C | 0.08735000  | 0.42651600  | -1.12715300 |
| C         | -4.54571800 | -4.57858400 | -1.00219900 | C | 1.21432700  | 1.31315200  | -1.55467700 |
| C         | -4.06671100 | -3.56934900 | -1.83902200 | C | 1.83516300  | 2.22469000  | -0.68643600 |
| C         | -4.28916500 | -2.22187600 | -1.53167900 | C | 1.58472900  | 1.32219400  | -2.90665400 |
| C         | -4.99850800 | -1.90538200 | -0.36496500 | C | 2.76607200  | 3.14329900  | -1.16642000 |
| C         | -5.47205200 | -2.91216500 | 0.47871600  | H | 1.59335700  | 2.19348000  | 0.36749800  |
| C         | -5.24710100 | -4.25365600 | 0.16118600  | C | 2.52227600  | 2.23914500  | -3.38715900 |
| H         | -4.36541500 | -5.61930000 | -1.25609700 | H | 1.13030700  | 0.61047700  | -3.58878600 |
| H         | -3.50108900 | -3.82288700 | -2.73067600 | C | 3.10870900  | 3.16228800  | -2.52179700 |
| H         | -5.18032700 | -0.86225100 | -0.11691600 | H | 3.23922600  | 3.83628200  | -0.47582300 |
| H         | -6.01997600 | -2.64922800 | 1.37935100  | H | 2.79123500  | 2.22841700  | -4.43960500 |
| H         | -5.61736300 | -5.03890400 | 0.81384300  | H | 3.83771300  | 3.87683700  | -2.89306500 |
| C         | -3.71809500 | -1.12357700 | -2.40973500 | N | -1.00077300 | 2.22382900  | 0.09283600  |
| H         | -3.55304900 | -1.50307600 | -3.42168100 | N | -1.98327200 | 3.02949100  | -0.01044500 |
| H         | -4.42409400 | -0.28830300 | -2.46908300 | N | -1.95040200 | 4.08581800  | 0.77800400  |
| C         | -2.38489700 | -0.62739300 | -1.87375500 | C | -2.96053500 | 5.11454500  | 0.44132100  |

|           |             |             |             |   |             |             |             |
|-----------|-------------|-------------|-------------|---|-------------|-------------|-------------|
| H         | -2.73567000 | 5.96494100  | 1.08928200  | C | -1.13587100 | 5.77403700  | 1.88980500  |
| C         | -2.82953300 | 5.56821500  | -1.01859600 | C | -2.31094100 | 6.48033900  | 2.16364000  |
| H         | -3.04681200 | 4.73724700  | -1.69431600 | H | -4.37892800 | 6.76236200  | 1.62051100  |
| H         | -1.81694900 | 5.92389900  | -1.22828900 | H | -4.32772900 | 5.06541200  | -0.18264100 |
| C         | -4.36857300 | 4.60577700  | 0.76843500  | H | -0.20302500 | 4.25420000  | 0.67018200  |
| H         | -4.59920700 | 3.72651100  | 0.16048000  | H | -0.23817100 | 5.96616400  | 2.47135300  |
| H         | -4.44823000 | 4.32758200  | 1.82348300  | H | -2.33052100 | 7.22421800  | 2.95534600  |
| C         | -0.80625200 | 4.36491100  | 1.67683000  | C | -2.22352100 | 3.51545200  | -0.99563100 |
| H         | -0.37600200 | 3.38267900  | 1.88063300  | H | -3.19141100 | 3.49509600  | -1.50708800 |
| C         | 0.25002600  | 5.21185400  | 0.95537800  | H | -1.46694800 | 3.80012700  | -1.73672100 |
| H         | 0.58537300  | 4.70960800  | 0.04487200  | C | -1.88022900 | 2.12758700  | -0.48792600 |
| H         | 1.11923800  | 5.36034400  | 1.60470000  | C | -2.87437600 | 1.19716800  | -0.20766100 |
| H         | -0.14826600 | 6.19881600  | 0.69526800  | H | -3.92432400 | 1.44308700  | -0.31293500 |
| C         | -1.26769900 | 4.97792900  | 3.00167800  | C | -0.20619400 | 0.68462700  | 0.21917700  |
| H         | -2.06137200 | 4.37988700  | 3.45929700  | N | -0.57675200 | 1.88107500  | -0.27923400 |
| H         | -0.42077200 | 5.00918900  | 3.69385900  | O | 1.05353900  | 0.52812000  | 0.55922400  |
| H         | -1.62890100 | 6.00482000  | 2.88687200  | C | 3.85888100  | 0.21887600  | 1.40565700  |
| H         | -5.11253100 | 5.37956900  | 0.55535900  | C | 4.40742700  | 0.33940200  | 2.82482500  |
| H         | -3.53295800 | 6.38097400  | -1.22465300 | C | 5.13657200  | 1.67799600  | 3.01086700  |
| <b>18</b> |             |             |             | H | 5.50433400  | 1.76305200  | 4.03935300  |
| C         | 1.42039400  | -0.25481900 | -2.64828300 | H | 5.99251800  | 1.75838300  | 2.33316700  |
| C         | 2.18368100  | 0.96552000  | -2.72280000 | H | 4.46887500  | 2.51767700  | 2.80520600  |
| C         | 3.59200000  | 0.61497900  | -2.59692000 | C | 5.35315700  | -0.84218600 | 3.10802800  |
| C         | 3.68437500  | -0.79218800 | -2.37627200 | H | 5.69420500  | -0.80951200 | 4.14854400  |
| C         | 2.32963900  | -1.32817100 | -2.37293800 | H | 4.84484700  | -1.79344900 | 2.93382200  |
| Rh        | 2.51953000  | 0.11360000  | -0.77909400 | H | 6.23721400  | -0.80369200 | 2.46162800  |
| C         | 4.71580900  | 1.60310400  | -2.62277500 | C | 3.17924500  | 0.26590800  | 3.76230600  |
| C         | 1.61566100  | 2.33090100  | -2.95846300 | H | 3.49807600  | 0.38027800  | 4.80418300  |
| H         | 1.24603400  | 2.42613600  | -3.98680800 | H | 2.46178000  | 1.05796700  | 3.52693600  |
| H         | 0.78943500  | 2.51320200  | -2.26335800 | H | 2.67006000  | -0.69594900 | 3.65623100  |
| H         | 2.36989900  | 3.10330200  | -2.79490500 | O | 3.42932700  | -0.90371300 | 0.98532800  |
| C         | -0.05781700 | -0.37058200 | -2.83611100 | O | 3.75416600  | 1.24082300  | 0.65388600  |
| C         | 1.97287000  | -2.76466700 | -2.15646700 | H | 5.65264900  | 1.15291800  | -2.29132700 |
| H         | 0.94675600  | -2.87303900 | -1.80315200 | H | 4.85796200  | 1.99010800  | -3.63851900 |
| H         | 2.08376600  | -3.32963200 | -3.09078200 | H | 4.50085600  | 2.44597700  | -1.96080600 |
| H         | 2.62408500  | -3.21704700 | -1.40536400 | H | -0.56673200 | 0.55267800  | -2.55744500 |
| C         | 4.92089800  | -1.60620700 | -2.14982900 | H | -0.27190700 | -0.57804800 | -3.89196100 |
| H         | 4.78736500  | -2.27599300 | -1.29633500 | H | -0.47593900 | -1.18007400 | -2.23628400 |
| H         | 5.15022700  | -2.21555000 | -3.03214000 | C | -2.49936200 | -0.08614300 | 0.22261100  |
| H         | 5.78379300  | -0.97144600 | -1.94035800 | C | -1.13356800 | -0.39410400 | 0.38815400  |
| C         | -3.45896600 | 6.22162800  | 1.41461100  | C | -0.65651300 | -1.78201300 | 0.60167100  |
| C         | -3.42929900 | 5.26393800  | 0.39747500  | C | -1.25689100 | -2.84726600 | -0.10393600 |
| C         | -2.25642700 | 4.55618600  | 0.11336000  | C | 0.44527800  | -2.08349700 | 1.42280400  |
| C         | -1.10730400 | 4.81982100  | 0.87374000  | C | -0.78972600 | -4.15532800 | 0.02016300  |

|           |             |             |             |   |             |             |             |
|-----------|-------------|-------------|-------------|---|-------------|-------------|-------------|
| H         | -2.09004400 | -2.64064000 | -0.76642300 | H | 0.24194400  | -3.31878400 | -0.56299700 |
| C         | 0.91753800  | -3.39097700 | 1.53798500  | H | 0.88027200  | -4.33353800 | -1.87057700 |
| H         | 0.95215100  | -1.28269200 | 1.94071900  | H | 1.84690100  | -4.02505700 | -0.41746200 |
| C         | 0.30364400  | -4.43512000 | 0.84429300  | C | 4.27228800  | -2.98778600 | -1.54071400 |
| H         | -1.27287000 | -4.95316100 | -0.53813600 | H | 4.00923900  | -3.50627300 | -0.61626300 |
| H         | 1.78004800  | -3.58530200 | 2.16906300  | H | 4.48919600  | -3.74332700 | -2.30623100 |
| H         | 0.67532000  | -5.45198700 | 0.93674700  | H | 5.16540400  | -2.39487400 | -1.34743800 |
| N         | -3.45089400 | -1.06489000 | 0.58025800  | C | -1.80355200 | 6.85467200  | 0.44226700  |
| N         | -4.52835000 | -1.00323500 | -0.08745800 | C | -2.01979300 | 5.78571300  | -0.43093200 |
| N         | -5.50203400 | -1.81651500 | 0.31238100  | C | -1.32049600 | 4.58185900  | -0.28409000 |
| C         | -6.60510000 | -1.94306300 | -0.65953400 | C | -0.40136500 | 4.46543100  | 0.77005700  |
| H         | -7.28135500 | -2.69070500 | -0.23791200 | C | -0.18604900 | 5.53185100  | 1.64400200  |
| C         | -7.36247500 | -0.61655200 | -0.79148000 | C | -0.88294400 | 6.73229000  | 1.48339200  |
| H         | -6.69328900 | 0.15914500  | -1.17330100 | H | -2.35844500 | 7.77962500  | 0.30987900  |
| H         | -7.74731200 | -0.29146700 | 0.17944000  | H | -2.74065800 | 5.88966000  | -1.23886900 |
| C         | -6.10193800 | -2.45688000 | -2.01642000 | H | 0.13443000  | 3.53355800  | 0.91262200  |
| H         | -5.42054100 | -1.72836000 | -2.46409400 | H | 0.52545300  | 5.41871100  | 2.45782200  |
| H         | -5.56580300 | -3.40332600 | -1.90081400 | H | -0.71427700 | 7.56049500  | 2.16593700  |
| C         | -5.32874900 | -2.74673600 | 1.44819800  | C | -1.53894600 | 3.44723100  | -1.27963200 |
| H         | -4.56674000 | -2.27056200 | 2.06939100  | H | -2.44920100 | 3.64510400  | -1.85529900 |
| C         | -6.61731900 | -2.87610700 | 2.26648600  | H | -0.70178700 | 3.43513200  | -1.98948200 |
| H         | -7.01325100 | -1.89238800 | 2.53508900  | C | -1.61703200 | 2.07588700  | -0.64343700 |
| H         | -6.40282100 | -3.42257200 | 3.19002700  | C | -2.83279700 | 1.46641300  | -0.35661200 |
| H         | -7.39837400 | -3.43154900 | 1.73642400  | H | -3.77480800 | 1.95621100  | -0.57205500 |
| C         | -4.78364300 | -4.10369200 | 0.98271300  | C | -0.42486100 | 0.32701600  | 0.29566800  |
| H         | -3.82838100 | -3.97356600 | 0.46935600  | N | -0.43836100 | 1.51287400  | -0.33080500 |
| H         | -4.61921200 | -4.75982200 | 1.84393000  | O | 0.75926300  | -0.14375000 | 0.68010800  |
| H         | -5.48968100 | -4.60267700 | 0.30896600  | C | 4.58490100  | -0.69732100 | 1.00479900  |
| H         | -6.94227900 | -2.61519100 | -2.70006200 | C | 5.14492400  | -0.73091500 | 2.44981400  |
| H         | -8.20408900 | -0.72297400 | -1.48343400 | C | 6.59463600  | -1.23835700 | 2.41944000  |
| <b>19</b> |             |             |             | H | 7.03616300  | -1.19120900 | 3.42161700  |
| C         | 0.99224000  | -1.31223400 | -2.44551300 | H | 6.63770200  | -2.27901700 | 2.07897700  |
| C         | 1.92518900  | -0.37106500 | -2.95682800 | H | 7.19760500  | -0.63893600 | 1.73445800  |
| C         | 3.27262900  | -0.86476000 | -2.68023100 | C | 4.28576000  | -1.61357400 | 3.36945600  |
| C         | 3.14695900  | -2.11604700 | -1.99806300 | H | 4.69389400  | -1.60697000 | 4.38712800  |
| C         | 1.73877200  | -2.37053300 | -1.77859000 | H | 3.25393600  | -1.25820300 | 3.39988700  |
| Rh        | 2.24993200  | -0.53591100 | -0.80013500 | H | 4.27136600  | -2.65065300 | 3.01688400  |
| C         | 4.55239700  | -0.19623000 | -3.07145400 | C | 5.10757700  | 0.73181200  | 2.94897400  |
| C         | 1.61433600  | 0.93296000  | -3.62317200 | H | 5.50602800  | 0.79636100  | 3.96817100  |
| H         | 1.85078500  | 0.88913600  | -4.69276700 | H | 5.71535500  | 1.37397700  | 2.30253300  |
| H         | 0.56052600  | 1.19224500  | -3.50898600 | H | 4.08189700  | 1.11342500  | 2.95349300  |
| H         | 2.20559700  | 1.73422000  | -3.17116700 | O | 3.29735500  | -0.87170000 | 0.94834500  |
| C         | -0.49734800 | -1.23594500 | -2.55678400 | O | 5.33189300  | -0.46417900 | 0.04903000  |
| C         | 1.14332500  | -3.57640400 | -1.12090500 | H | 5.25049900  | -0.22447100 | -2.23252700 |

|   |             |             |             |             |             |             |             |
|---|-------------|-------------|-------------|-------------|-------------|-------------|-------------|
| H | 4.99866900  | -0.69888100 | -3.93831900 | H           | 1.54248500  | 0.99081400  | 1.27245300  |
| H | 4.37941200  | 0.84884800  | -3.33542000 | C           | 3.29310400  | 3.64023200  | 0.54170000  |
| H | -0.85767500 | -0.20926800 | -2.46804000 | H           | 2.47598000  | 4.36674200  | 0.47832000  |
| H | -0.81123100 | -1.62863800 | -3.53181800 | H           | 3.77946700  | 3.76698200  | 1.51216500  |
| H | -0.98211900 | -1.82862800 | -1.78133500 | H           | 4.00334500  | 3.80897200  | -0.26694300 |
| C | -2.83080400 | 0.19406400  | 0.24112800  | <b>TS20</b> |             |             |             |
| C | -1.60445200 | -0.42591500 | 0.55766500  | C           | -1.28010300 | -0.92442100 | 2.59558300  |
| C | -1.52015100 | -1.82768300 | 1.03498200  | C           | -2.25765700 | 0.05753700  | 2.91693400  |
| C | -2.29707000 | -2.82928900 | 0.41970800  | C           | -3.57649200 | -0.48140500 | 2.57090300  |
| C | -0.62180800 | -2.21843000 | 2.04378400  | C           | -3.39009400 | -1.78566700 | 2.03183100  |
| C | -2.18494500 | -4.16696000 | 0.79884100  | C           | -1.96406400 | -2.04530800 | 1.96868500  |
| H | -2.98211000 | -2.55303900 | -0.37452600 | Rh          | -2.35647600 | -0.32002900 | 0.78100400  |
| C | -0.51212200 | -3.55578500 | 2.42361700  | C           | -4.89506100 | 0.20704200  | 2.72306700  |
| H | 0.00533300  | -1.47070500 | 2.51090500  | C           | -1.98844500 | 1.41138400  | 3.49601100  |
| C | -1.28988400 | -4.53730300 | 1.80479400  | H           | -1.99356500 | 1.37542700  | 4.59218700  |
| H | -2.79016900 | -4.91952700 | 0.30043800  | H           | -1.01749900 | 1.78586500  | 3.16327300  |
| H | 0.19152200  | -3.83101200 | 3.20427400  | H           | -2.74796200 | 2.12582800  | 3.17288900  |
| H | -1.19589100 | -5.57876800 | 2.09926600  | C           | 0.19231700  | -0.82417700 | 2.83339400  |
| N | -4.01878600 | -0.46227800 | 0.62132800  | C           | -1.34551600 | -3.32677800 | 1.51243600  |
| N | -5.00573700 | -0.21691700 | -0.13980000 | H           | -0.28236700 | -3.21184600 | 1.30754500  |
| N | -6.17510400 | -0.70494200 | 0.25677000  | H           | -1.47225000 | -4.10042100 | 2.28071200  |
| C | -7.21874300 | -0.66748800 | -0.78745900 | H           | -1.81263800 | -3.67828600 | 0.59092100  |
| H | -8.09010100 | -1.15863500 | -0.34782000 | C           | -4.46247200 | -2.73532600 | 1.60345300  |
| C | -7.59196700 | 0.78073800  | -1.12483300 | H           | -4.09608500 | -3.41428000 | 0.83054000  |
| H | -6.72245600 | 1.30698800  | -1.52760500 | H           | -4.77785300 | -3.34073900 | 2.46305300  |
| H | -7.93287400 | 1.31219300  | -0.23159200 | H           | -5.31708100 | -2.19628800 | 1.19779300  |
| C | -6.79392300 | -1.45922300 | -2.03253700 | C           | 3.72065400  | 6.05752700  | -0.96565800 |
| H | -5.91854100 | -0.99350200 | -2.49344000 | C           | 3.55175900  | 5.11370400  | 0.05032600  |
| H | -6.53763800 | -2.49029800 | -1.77206400 | C           | 2.30219700  | 4.52939800  | 0.28496500  |
| C | -6.31433400 | -1.49705200 | 1.49781000  | C           | 1.21818900  | 4.90570700  | -0.52124800 |
| H | -5.49762800 | -1.14528300 | 2.13238200  | C           | 1.38570800  | 5.84629300  | -1.53695900 |
| C | -7.64303700 | -1.20563300 | 2.20185300  | C           | 2.63693100  | 6.42657800  | -1.76319600 |
| H | -7.79942300 | -0.12934600 | 2.31890400  | H           | 4.69785600  | 6.50277500  | -1.13225100 |
| H | -7.62730800 | -1.65927200 | 3.19749900  | H           | 4.40003300  | 4.82850200  | 0.66840300  |
| H | -8.50251700 | -1.62603900 | 1.66926100  | H           | 0.24651000  | 4.45061800  | -0.35814300 |
| C | -6.10027500 | -2.99297300 | 1.23210300  | H           | 0.53650400  | 6.12579100  | -2.15466400 |
| H | -5.11187300 | -3.16448700 | 0.80043700  | H           | 2.76495100  | 7.16000200  | -2.55442500 |
| H | -6.16283500 | -3.55511300 | 2.16979200  | C           | 2.12354900  | 3.47838700  | 1.36864200  |
| H | -6.86393200 | -3.38613500 | 0.55148900  | H           | 2.99916000  | 3.47526600  | 2.02624600  |
| H | -7.60579600 | -1.47905000 | -2.76666500 | H           | 1.24729400  | 3.72105000  | 1.97939400  |
| H | -8.39138800 | 0.80519900  | -1.87217200 | C           | 1.91850900  | 2.09408900  | 0.78276800  |
| C | 2.71280400  | 2.25657300  | 0.44553900  | C           | 2.99331400  | 1.26578800  | 0.48906000  |
| O | 2.87781200  | 1.56712100  | -0.57580500 | H           | 4.01310800  | 1.58829000  | 0.66116700  |
| O | 2.03523000  | 1.87603000  | 1.49317900  | C           | 0.40669300  | 0.55450900  | -0.08565400 |

|   |             |             |             |           |             |             |             |
|---|-------------|-------------|-------------|-----------|-------------|-------------|-------------|
| N | 0.65296800  | 1.74492500  | 0.50039300  | H         | 8.00683900  | 0.33791200  | -0.01390800 |
| O | -0.83785700 | 0.36046700  | -0.45839300 | C         | 6.58956600  | -2.13925300 | 2.00594300  |
| C | -4.42120000 | -0.73676000 | -1.29161900 | H         | 5.83459800  | -1.52354000 | 2.50195900  |
| C | -4.75087800 | -0.78748500 | -2.80534700 | H         | 6.15826000  | -3.12665600 | 1.81620200  |
| C | -6.26227200 | -0.95334300 | -3.00819100 | C         | 5.87231000  | -2.20034800 | -1.50359400 |
| H | -6.50564900 | -0.94804500 | -4.07716400 | H         | 5.03986200  | -1.77843300 | -2.07062400 |
| H | -6.61245000 | -1.89729900 | -2.57903500 | C         | 7.15610100  | -2.04293000 | -2.32492100 |
| H | -6.81137200 | -0.14761500 | -2.51551100 | H         | 7.38926600  | -0.98710800 | -2.49045900 |
| C | -3.98891400 | -1.94770000 | -3.47259100 | H         | 7.02011400  | -2.52022200 | -3.30030400 |
| H | -4.19908800 | -1.97335900 | -4.54831600 | H         | 8.02043100  | -2.51864600 | -1.84947400 |
| H | -2.91242600 | -1.83631900 | -3.32611400 | C         | 5.54389300  | -3.66601300 | -1.19002400 |
| H | -4.29310700 | -2.91122300 | -3.04743800 | H         | 4.58344100  | -3.73840700 | -0.67464000 |
| C | -4.27373000 | 0.55547200  | -3.40071700 | H         | 5.47548700  | -4.24521800 | -2.11673300 |
| H | -4.45212300 | 0.58397300  | -4.48189600 | H         | 6.32067000  | -4.12029800 | -0.56435400 |
| H | -4.81808200 | 1.39170000  | -2.94671300 | H         | 7.44307700  | -2.25741600 | 2.68116200  |
| H | -3.20511900 | 0.69611700  | -3.21473700 | H         | 8.50582000  | -0.16703300 | 1.61546100  |
| O | -3.14265600 | -0.81506300 | -1.06597200 | C         | -2.99754000 | 2.73944800  | -0.31784000 |
| O | -5.31053300 | -0.58795900 | -0.44763600 | O         | -3.35748200 | 1.77315800  | 0.35589900  |
| H | -5.47031100 | 0.08419100  | 1.80173400  | O         | -1.74983800 | 3.01357400  | -0.63773300 |
| H | -5.45526600 | -0.22366600 | 3.56178400  | H         | -1.13612200 | 2.30757700  | -0.30411300 |
| H | -4.76659800 | 1.27457600  | 2.90652600  | C         | -3.98530000 | 3.73199100  | -0.87263000 |
| H | 0.54048500  | 0.20804600  | 2.76706000  | H         | -3.62541600 | 4.75346000  | -0.72796100 |
| H | 0.42851100  | -1.20647800 | 3.83401700  | H         | -4.07545000 | 3.55884300  | -1.95005800 |
| H | 0.75201300  | -1.40990400 | 2.10338700  | H         | -4.95810100 | 3.58798300  | -0.40401300 |
| C | 2.75248800  | 0.00259700  | -0.08029700 | <b>21</b> |             |             |             |
| C | 1.42712900  | -0.41340000 | -0.33504800 | C         | 1.81823300  | -0.04477500 | -2.74016900 |
| C | 1.08922800  | -1.78880600 | -0.77624600 | C         | 3.10797100  | 0.55494400  | -2.72953000 |
| C | 1.81253000  | -2.89180300 | -0.27356300 | C         | 4.06346400  | -0.41640600 | -2.22893800 |
| C | 0.01287100  | -2.05540000 | -1.64571800 | C         | 3.34385900  | -1.65347500 | -1.99718300 |
| C | 1.49554600  | -4.19814400 | -0.64359600 | C         | 1.96181900  | -1.42192300 | -2.26903800 |
| H | 2.62109400  | -2.72040900 | 0.42714400  | Rh        | 2.59235500  | -0.08030000 | -0.68415200 |
| C | -0.30483900 | -3.36426300 | -2.00904600 | C         | 5.54566300  | -0.24193600 | -2.13539200 |
| H | -0.59455900 | -1.23732700 | -2.00732300 | C         | 3.43364800  | 1.95697900  | -3.13712400 |
| C | 0.43402700  | -4.44241500 | -1.51817800 | H         | 3.69144700  | 1.98658400  | -4.20291300 |
| H | 2.07057300  | -5.02553500 | -0.23589500 | H         | 2.59311900  | 2.62503800  | -2.94977700 |
| H | -1.14404300 | -3.53606800 | -2.67739000 | H         | 4.28862600  | 2.33315500  | -2.57165000 |
| H | 0.18124900  | -5.45960800 | -1.80454100 | C         | 0.54936200  | 0.60925100  | -3.19132600 |
| N | 3.80545900  | -0.83082500 | -0.50658400 | C         | 0.85592400  | -2.42074800 | -2.12958400 |
| N | 4.86324700  | -0.72769500 | 0.18816900  | H         | -0.10752100 | -1.93164500 | -1.98513700 |
| N | 5.92038600  | -1.38845300 | -0.26920400 | H         | 0.78953200  | -3.04758400 | -3.02733900 |
| C | 7.03455900  | -1.47604800 | 0.69492000  | H         | 1.01475400  | -3.06954700 | -1.26610600 |
| H | 7.77981500  | -2.12000000 | 0.22118000  | C         | 3.94246700  | -2.93571100 | -1.51195500 |
| C | 7.65699400  | -0.09439000 | 0.92805500  | H         | 3.22591800  | -3.49126100 | -0.90284600 |
| H | 6.91454800  | 0.58090700  | 1.36197900  | H         | 4.22280600  | -3.56301500 | -2.36751400 |

|   |             |             |             |   |             |             |             |
|---|-------------|-------------|-------------|---|-------------|-------------|-------------|
| H | 4.82550500  | -2.74077100 | -0.90293600 | C | -1.66406700 | -0.58406800 | 0.25984900  |
| C | -2.47301800 | 5.42152100  | 2.45164000  | C | -1.50097500 | -2.03353500 | 0.52373600  |
| C | -2.65064600 | 4.62981700  | 1.31737900  | C | -2.21430800 | -2.97711800 | -0.23830000 |
| C | -1.61562900 | 4.47547600  | 0.38645700  | C | -0.58089600 | -2.50709000 | 1.47620300  |
| C | -0.39555600 | 5.12229500  | 0.61072700  | C | -2.02690700 | -4.34532900 | -0.04895000 |
| C | -0.21734400 | 5.91529000  | 1.74691900  | H | -2.90200500 | -2.62831200 | -1.00104100 |
| C | -1.25363700 | 6.06848400  | 2.66917800  | C | -0.39723300 | -3.87641500 | 1.66683800  |
| H | -3.28452500 | 5.53353300  | 3.16528800  | H | 0.00800900  | -1.80075700 | 2.04728800  |
| H | -3.59695100 | 4.11932000  | 1.15458300  | C | -1.11668200 | -4.80178200 | 0.90723500  |
| H | 0.41801800  | 4.97215100  | -0.09094300 | H | -2.58355300 | -5.05385900 | -0.65644900 |
| H | 0.73485900  | 6.41309200  | 1.90944400  | H | 0.31910900  | -4.21851100 | 2.40813600  |
| H | -1.11348500 | 6.68537900  | 3.55223200  | H | -0.96484500 | -5.86746900 | 1.05419200  |
| C | -1.81471800 | 3.59420600  | -0.83999800 | N | -4.05430000 | -0.74479700 | 0.29773400  |
| H | -2.76032500 | 3.84486300  | -1.33111000 | N | -5.09364400 | -0.32704600 | -0.30914700 |
| H | -1.00866400 | 3.77851200  | -1.55729400 | N | -6.22173800 | -0.94566000 | -0.00800800 |
| C | -1.83976300 | 2.12641400  | -0.48574800 | C | -7.34376200 | -0.62278100 | -0.91469500 |
| C | -2.98617200 | 1.39527600  | -0.32929800 | H | -8.16967000 | -1.26235400 | -0.59522400 |
| H | -3.95500100 | 1.85075400  | -0.48215700 | C | -7.76597900 | 0.84181800  | -0.75091900 |
| C | -0.47696700 | 0.22817900  | 0.14177700  | H | -6.94122100 | 1.50343600  | -1.02933500 |
| N | -0.63549300 | 1.53364300  | -0.25760500 | H | -8.04361400 | 1.05413800  | 0.28557400  |
| O | 0.67971100  | -0.21535300 | 0.38109600  | C | -6.99912600 | -0.96822700 | -2.36987000 |
| C | 4.30509700  | -1.31037600 | 1.47174500  | H | -6.16609800 | -0.35123500 | -2.71706200 |
| C | 4.30734700  | -1.95458700 | 2.88468000  | H | -6.71146100 | -2.01941500 | -2.46456200 |
| C | 5.74267700  | -2.30286000 | 3.29763500  | C | -6.27487900 | -2.05808000 | 0.96805000  |
| H | 5.74933200  | -2.77189300 | 4.28880300  | H | -5.41930800 | -1.88154500 | 1.62335700  |
| H | 6.19952500  | -2.98999500 | 2.58032400  | C | -7.55558500 | -2.00820400 | 1.80618300  |
| H | 6.36680700  | -1.40571200 | 3.33144500  | H | -7.70890100 | -1.01355300 | 2.23473600  |
| C | 3.44496300  | -3.23261600 | 2.81751200  | H | -7.47020300 | -2.72467700 | 2.62862600  |
| H | 3.39229800  | -3.71303900 | 3.80185100  | H | -8.44657800 | -2.28100000 | 1.23124800  |
| H | 2.43263500  | -2.99021100 | 2.48480900  | C | -6.07217300 | -3.40862500 | 0.26980800  |
| H | 3.87154000  | -3.95649000 | 2.11278800  | H | -5.11517000 | -3.42357800 | -0.25618700 |
| C | 3.68398300  | -0.96175800 | 3.88464200  | H | -6.06585000 | -4.21683300 | 1.00826300  |
| H | 3.64919500  | -1.40141900 | 4.88882000  | H | -6.87852900 | -3.60878200 | -0.44468900 |
| H | 4.27494500  | -0.04081300 | 3.93883600  | H | -7.86265500 | -0.78579800 | -3.01723800 |
| H | 2.67047200  | -0.69413700 | 3.57708100  | H | -8.62282900 | 1.06565800  | -1.39394000 |
| O | 3.11100700  | -0.96735900 | 1.10287100  | C | 2.54295500  | 2.83338100  | 0.01938300  |
| O | 5.34698100  | -1.19748900 | 0.81767800  | O | 3.10612000  | 1.72309100  | 0.28922000  |
| H | 5.89936400  | -0.65466200 | -1.18958000 | O | 1.56233900  | 3.00111300  | -0.75707800 |
| H | 6.03888200  | -0.75102800 | -2.97337800 | H | 0.24880900  | 2.07627500  | -0.41014400 |
| H | 5.82173900  | 0.81384300  | -2.17173000 | C | 3.11379800  | 4.04805900  | 0.73569100  |
| H | 0.55022400  | 1.66780300  | -2.92433500 | H | 3.23974200  | 4.86695200  | 0.02161200  |
| H | 0.43941800  | 0.52299300  | -4.27944200 | H | 2.38806900  | 4.37592800  | 1.48765700  |
| H | -0.32430500 | 0.14627800  | -2.72862200 | H | 4.06114100  | 3.81676600  | 1.22324900  |
| C | -2.90580800 | 0.02485900  | 0.05244000  |   |             |             |             |

**P1**

|   |             |             |             |           |             |             |             |
|---|-------------|-------------|-------------|-----------|-------------|-------------|-------------|
| C | -5.49847000 | -1.10973200 | 1.90206600  | C         | 3.94192000  | -0.95726300 | 0.89133300  |
| C | -4.39639900 | -1.37127200 | 1.09091700  | H         | 3.32196500  | -0.14687200 | 1.27924200  |
| C | -4.45330100 | -1.13192400 | -0.28949800 | C         | 4.68061700  | -1.61596200 | 2.05987100  |
| C | -5.63282800 | -0.61691400 | -0.83761800 | H         | 3.97670400  | -2.06494400 | 2.76662900  |
| C | -6.73951900 | -0.35101400 | -0.02568500 | H         | 5.26032300  | -0.85531700 | 2.59174700  |
| C | -6.67476500 | -0.59795100 | 1.34508800  | H         | 5.38414500  | -2.38882100 | 1.73250200  |
| H | -5.44070900 | -1.30090500 | 2.96981300  | C         | 4.89263300  | -0.36883300 | -0.15898000 |
| H | -3.47631100 | -1.75372000 | 1.52577700  | H         | 4.32287100  | 0.11984300  | -0.95292600 |
| H | -5.68960200 | -0.42849900 | -1.90726200 | H         | 5.54647500  | 0.37902700  | 0.30102000  |
| H | -7.64846000 | 0.04824900  | -0.46640100 | H         | 5.52533400  | -1.14548700 | -0.60358400 |
| H | -7.53281500 | -0.39174600 | 1.97809900  | H         | 3.71680300  | -4.27584300 | -2.08686100 |
| C | -3.23302200 | -1.38989300 | -1.15599000 | H         | 2.79612200  | -5.30302700 | 0.08804900  |
| H | -2.88123500 | -2.41814900 | -1.02618500 | H         | -3.31577900 | 1.19994700  | -0.97817200 |
| H | -3.50555600 | -1.27925400 | -2.21361600 | <b>22</b> |             |             |             |
| C | -2.08532600 | -0.45755300 | -0.84480400 | C         | 2.08009700  | -0.63225900 | -1.41455100 |
| C | -0.81781100 | -0.86700200 | -0.56656800 | C         | 2.14611900  | -1.62562000 | -0.39280700 |
| H | -0.57155900 | -1.91907800 | -0.53901500 | C         | 0.85459700  | -2.27912000 | -0.32315900 |
| C | -1.44921700 | 1.91608800  | -0.58357300 | C         | 0.04286600  | -1.76810400 | -1.41729100 |
| N | -2.36140700 | 0.88223200  | -0.85477300 | C         | 0.77318800  | -0.73808100 | -2.06616000 |
| O | -1.85696200 | 3.07765200  | -0.57251000 | Rh        | 0.53065300  | -0.21503200 | 0.07026200  |
| C | 0.20284600  | 0.10758500  | -0.30262200 | C         | 0.47236600  | -3.39141400 | 0.60267500  |
| C | -0.07556300 | 1.47009600  | -0.33852400 | C         | 3.32111700  | -1.93235700 | 0.47831800  |
| C | 0.95964000  | 2.50829500  | -0.12550800 | H         | 3.86653200  | -2.78945500 | 0.06320300  |
| C | 2.20460700  | 2.43188400  | -0.77522600 | H         | 3.98520500  | -1.07389800 | 0.55591500  |
| C | 0.71835000  | 3.60532100  | 0.71966800  | H         | 2.99845600  | -2.19190400 | 1.48895400  |
| C | 3.18660700  | 3.39779300  | -0.56425600 | C         | 3.17047900  | 0.33477700  | -1.75423400 |
| H | 2.39215500  | 1.61075400  | -1.45789200 | C         | 0.30716100  | 0.06462800  | -3.24023200 |
| C | 1.70264200  | 4.56931100  | 0.93337300  | H         | 0.72715800  | 1.07176800  | -3.22810500 |
| H | -0.24814900 | 3.69947900  | 1.19907400  | H         | 0.61342400  | -0.41803200 | -4.17641600 |
| C | 2.94188700  | 4.46930900  | 0.29740100  | H         | -0.77940300 | 0.16277000  | -3.23919100 |
| H | 4.13991200  | 3.31732700  | -1.07989800 | C         | -1.33485700 | -2.23916100 | -1.75872600 |
| H | 1.49803700  | 5.40502500  | 1.59702800  | H         | -1.93695500 | -1.43687900 | -2.18554400 |
| H | 3.70536900  | 5.22454100  | 0.46313000  | H         | -1.27728400 | -3.06600700 | -2.47710100 |
| N | 1.50660300  | -0.26801100 | 0.06452700  | H         | -1.85078700 | -2.60417900 | -0.86836200 |
| N | 1.78416800  | -1.48901800 | -0.15644100 | C         | -2.43307400 | 0.16016200  | 0.19724500  |
| N | 2.97637700  | -1.88829600 | 0.26584300  | C         | -3.81709200 | -0.10078000 | 0.82414600  |
| C | 3.36702500  | -3.22820900 | -0.21535900 | C         | -4.67724500 | -0.86533600 | -0.20137700 |
| H | 4.39222600  | -3.37445200 | 0.13368100  | H         | -5.68885600 | -1.01268300 | 0.19215400  |
| C | 2.47830700  | -4.30747800 | 0.41372800  | H         | -4.74002400 | -0.31216500 | -1.14112100 |
| H | 1.43783200  | -4.15908700 | 0.11194300  | H         | -4.25421600 | -1.85409300 | -0.41346500 |
| H | 2.52903500  | -4.26490400 | 1.50556900  | C         | -4.44786900 | 1.28159300  | 1.09996200  |
| C | 3.36436200  | -3.29605700 | -1.74904900 | H         | -5.45761100 | 1.16079500  | 1.50751900  |
| H | 2.35278300  | -3.13758900 | -2.13184100 | H         | -3.85363400 | 1.84397000  | 1.82839000  |
| H | 4.01625600  | -2.52780200 | -2.17476800 | H         | -4.50953200 | 1.86656700  | 0.17836500  |



|             |             |             |             |           |             |             |             |
|-------------|-------------|-------------|-------------|-----------|-------------|-------------|-------------|
| C           | -3.69944500 | -0.90233300 | 2.12737100  | C         | -1.22640300 | -0.86371600 | -2.71155200 |
| H           | -4.69384600 | -1.06404800 | 2.55835500  | H         | -1.66518800 | 0.13415000  | -2.73941000 |
| H           | -3.23931500 | -1.87898800 | 1.94814600  | H         | -1.13583400 | -1.23713400 | -3.73894600 |
| H           | -3.07936900 | -0.37814800 | 2.85795500  | H         | -1.92193900 | -1.51566900 | -2.17977100 |
| O           | -1.41760300 | -0.16102400 | 0.89124900  | C         | -2.49243800 | 0.14845700  | 0.25061100  |
| O           | -2.40439500 | 0.68015500  | -0.95554000 | C         | -3.85824200 | -0.42291800 | 0.66404300  |
| H           | -0.58414000 | -3.32466000 | 0.87274800  | C         | -4.68630700 | -0.68877100 | -0.60941100 |
| H           | 0.64779200  | -4.36856000 | 0.13562600  | H         | -5.68331000 | -1.05038800 | -0.33634600 |
| H           | 1.05206500  | -3.34407600 | 1.52632400  | H         | -4.79186500 | 0.22170600  | -1.20323800 |
| H           | 3.54211500  | 0.78702800  | -0.83122400 | H         | -4.21429400 | -1.45440300 | -1.23593200 |
| H           | 3.99431400  | -0.17318100 | -2.26920800 | C         | -4.55659500 | 0.65533700  | 1.52216100  |
| H           | 2.80352200  | 1.12934700  | -2.40700700 | H         | -5.55334100 | 0.31009500  | 1.81701800  |
| C           | 2.22179500  | 0.71250900  | 2.26484400  | H         | -3.98534800 | 0.86034500  | 2.43382800  |
| O           | 1.08113100  | 0.12434600  | 2.02672900  | H         | -4.65949900 | 1.58761800  | 0.96112800  |
| O           | 3.11110900  | 0.95909900  | 1.44609600  | C         | -3.68588700 | -1.71655200 | 1.47130100  |
| C           | 2.36872000  | 1.11083300  | 3.73066400  | H         | -4.66607800 | -2.09765100 | 1.77721100  |
| H           | 3.40857000  | 1.36010900  | 3.94835400  | H         | -3.18818600 | -2.48984400 | 0.87780900  |
| H           | 1.74043000  | 1.98712500  | 3.92213400  | H         | -3.07837300 | -1.54690800 | 2.36304400  |
| H           | 2.02005900  | 0.30941400  | 4.38711200  | O         | -1.45421300 | -0.38777700 | 0.71007000  |
| C           | 0.11662000  | 2.78976100  | -0.81585400 | O         | -2.52517600 | 1.15563300  | -0.54105800 |
| O           | 0.63015800  | 1.98081700  | -0.02739800 | H         | -1.09320900 | -2.96949700 | -0.54508300 |
| O           | -0.91797800 | 2.55780400  | -1.57053400 | H         | -0.13322700 | -3.85778600 | -1.74693100 |
| H           | -1.43877700 | 1.68289200  | -1.30486400 | H         | 0.42275100  | -3.72857300 | -0.06743100 |
| C           | 0.69730400  | 4.17447000  | -0.95571400 | H         | 3.92083200  | 0.39254000  | -0.20409600 |
| H           | 0.84742500  | 4.40423400  | -2.01437100 | H         | 4.28693600  | 0.13511100  | -1.93843300 |
| H           | -0.01683100 | 4.90468600  | -0.56255000 | H         | 3.39071700  | 1.56798700  | -1.40677500 |
| H           | 1.63766600  | 4.24209200  | -0.41006600 | C         | 2.10939000  | -0.29789000 | 2.49474800  |
| <b>TS23</b> |             |             |             | O         | 0.95305400  | -0.58285400 | 1.96335400  |
| C           | 2.25975600  | -0.25257800 | -1.36443400 | O         | 3.12621100  | 0.06521900  | 1.89941300  |
| C           | 1.99860800  | -1.57430700 | -0.85949800 | C         | 2.09731300  | -0.44959900 | 4.01328000  |
| C           | 0.65032800  | -1.92738700 | -1.21428600 | H         | 3.11926500  | -0.45327700 | 4.39574400  |
| C           | 0.11709600  | -0.85804600 | -2.05231700 | H         | 1.55257500  | 0.39539700  | 4.44720100  |
| C           | 1.09571200  | 0.16411500  | -2.13972200 | H         | 1.57364300  | -1.36286000 | 4.30742400  |
| Rh          | 0.57037500  | -0.15188200 | -0.00890900 | C         | 0.16641100  | 2.87047300  | 0.13722600  |
| C           | -0.07562600 | -3.19281100 | -0.87686300 | O         | 0.72794200  | 1.87393400  | 0.66067000  |
| C           | 2.95281700  | -2.40898700 | -0.06727300 | O         | -0.83499500 | 2.83839200  | -0.65678400 |
| H           | 3.56205800  | -3.01299800 | -0.75135500 | H         | -1.58180000 | 1.88243500  | -0.60040900 |
| H           | 3.60314900  | -1.77747800 | 0.53748200  | C         | 0.71357700  | 4.24168000  | 0.47086000  |
| H           | 2.42157900  | -3.08630000 | 0.60427300  | H         | 0.81955800  | 4.82488800  | -0.44799200 |
| C           | 3.54251500  | 0.50263100  | -1.22108700 | H         | -0.00687000 | 4.76582800  | 1.10692600  |
| C           | 0.97229600  | 1.44085500  | -2.91086300 | H         | 1.66908500  | 4.16094200  | 0.98877300  |
| H           | 1.57486200  | 2.23256500  | -2.46183200 | <b>24</b> |             |             |             |
| H           | 1.32562700  | 1.29230800  | -3.93863500 | C         | 2.39603000  | 0.36208900  | -1.19237600 |
| H           | -0.05964800 | 1.79127300  | -2.94119900 | C         | 1.83470400  | -0.88813800 | -1.66573100 |

|    |             |             |             |              |             |             |             |
|----|-------------|-------------|-------------|--------------|-------------|-------------|-------------|
| C  | 0.51060000  | -0.62603100 | -2.12953600 | H            | 2.80754000  | -3.35362000 | 3.25079900  |
| C  | 0.26690300  | 0.81305200  | -2.02460800 | H            | 1.48920700  | -2.33106000 | 3.88177100  |
| C  | 1.42986900  | 1.41115100  | -1.47441900 | H            | 1.10043600  | -3.65750200 | 2.78653400  |
| Rh | 0.62719300  | -0.05717200 | -0.03601800 | C            | 0.13696300  | 2.31651500  | 1.70647300  |
| C  | -0.47104400 | -1.61554600 | -2.67365500 | O            | 0.75407200  | 1.20580100  | 1.65095400  |
| C  | 2.53143000  | -2.21052000 | -1.63230000 | O            | -0.77146600 | 2.70310200  | 0.91706900  |
| H  | 3.16250400  | -2.31641000 | -2.52365900 | H            | -1.79565800 | 1.79436400  | 0.49803800  |
| H  | 3.15317300  | -2.28245400 | -0.73949900 | C            | 0.55039700  | 3.25871400  | 2.82239100  |
| H  | 1.81740500  | -3.03642300 | -1.62055000 | H            | 0.83733400  | 4.22026200  | 2.38569400  |
| C  | 3.79272900  | 0.55787900  | -0.69648800 | H            | -0.31100600 | 3.44347500  | 3.47117400  |
| C  | 1.63277700  | 2.86713400  | -1.19796500 | H            | 1.37545200  | 2.84840400  | 3.40466600  |
| H  | 2.27614200  | 3.00780000  | -0.32670900 | <b>HOPIv</b> |             |             |             |
| H  | 2.11859400  | 3.34514400  | -2.05708800 | C            | 0.94271300  | 0.18767000  | 0.00002200  |
| H  | 0.68530900  | 3.36718200  | -0.99752400 | O            | 1.52344900  | 1.25150100  | -0.00002100 |
| C  | -0.97363100 | 1.52655100  | -2.46473500 | O            | 1.61267400  | -0.99513500 | 0.00008700  |
| H  | -1.18414400 | 2.38002100  | -1.81820600 | H            | 2.55737200  | -0.76821700 | 0.00009700  |
| H  | -0.85680600 | 1.88905400  | -3.49348700 | C            | -0.57310300 | -0.01021300 | -0.00001300 |
| H  | -1.84378200 | 0.86816800  | -2.43960700 | C            | -1.25185100 | 1.36649400  | -0.00010300 |
| C  | -2.56482100 | -0.02182900 | 0.29593600  | H            | -2.33977700 | 1.24406200  | -0.00012900 |
| C  | -3.88999900 | -0.78278800 | 0.18444900  | H            | -0.96561900 | 1.94593900  | 0.88163600  |
| C  | -4.53912100 | -0.39355400 | -1.16265000 | H            | -0.96556600 | 1.94585100  | -0.88188200 |
| H  | -5.50054600 | -0.90581400 | -1.27233500 | C            | -0.96893600 | -0.80607400 | -1.26311000 |
| H  | -4.70829500 | 0.68444800  | -1.22013900 | H            | -0.48574700 | -1.78606100 | -1.27985100 |
| H  | -3.90640600 | -0.69042700 | -2.00756300 | H            | -2.05399100 | -0.95248400 | -1.27974900 |
| C  | -4.80345300 | -0.34698100 | 1.34953600  | H            | -0.68725300 | -0.26676500 | -2.17363800 |
| H  | -5.76857000 | -0.85866200 | 1.27379500  | C            | -0.96901200 | -0.80594700 | 1.26313900  |
| H  | -4.35730100 | -0.60788100 | 2.31496100  | H            | -0.68738200 | -0.26654700 | 2.17363000  |
| H  | -4.97511200 | 0.73159800  | 1.32991800  | H            | -2.05406700 | -0.95235400 | 1.27972900  |
| C  | -3.63816700 | -2.29574500 | 0.23852100  | H            | -0.48582300 | -1.78593200 | 1.28000800  |
| H  | -4.59077900 | -2.83100700 | 0.16909100  | <b>16a'</b>  |             |             |             |
| H  | -2.99617800 | -2.62199200 | -0.58417300 | C            | 0.44660000  | -1.66980100 | -2.75567300 |
| H  | -3.14320700 | -2.57889700 | 1.17072300  | C            | 1.54031800  | -0.76461800 | -3.01974200 |
| O  | -1.48943900 | -0.63877200 | 0.35801000  | C            | 2.74242000  | -1.39046900 | -2.56599800 |
| O  | -2.68700500 | 1.27375300  | 0.29351600  | C            | 2.40911900  | -2.69329500 | -2.01822400 |
| H  | -1.46357800 | -1.44204300 | -2.25090000 | C            | 0.99187900  | -2.87517800 | -2.17928100 |
| H  | -0.54316500 | -1.52813500 | -3.76427400 | Rh           | 1.41218600  | -1.11940800 | -0.86662500 |
| H  | -0.18113000 | -2.63862200 | -2.42903000 | C            | 4.08517400  | -0.73791800 | -2.59571500 |
| H  | 4.03980200  | -0.22441400 | 0.02160200  | C            | 1.42221500  | 0.53378100  | -3.75138800 |
| H  | 4.49678900  | 0.52858100  | -1.53804800 | H            | 1.45899100  | 0.34667600  | -4.83263500 |
| H  | 3.90092000  | 1.52367600  | -0.19885400 | H            | 0.47336200  | 1.02468200  | -3.52358700 |
| C  | 2.00574300  | -1.93200500 | 1.83643600  | H            | 2.22089100  | 1.21740400  | -3.46942800 |
| O  | 0.85772300  | -1.55469000 | 1.35529000  | C            | -0.96350300 | -1.40472800 | -3.19449500 |
| O  | 3.12450500  | -1.58914500 | 1.44406400  | C            | 0.23875200  | -4.11974200 | -1.83696900 |
| C  | 1.84779800  | -2.89236100 | 3.01279600  | H            | -0.83832800 | -3.98971900 | -1.95836100 |

|   |             |             |             |   |             |             |             |
|---|-------------|-------------|-------------|---|-------------|-------------|-------------|
| H | 0.55948300  | -4.92989500 | -2.50321500 | H | 3.99601900  | 0.27272000  | -2.18861600 |
| H | 0.45358500  | -4.40239300 | -0.80500400 | H | -1.36635000 | -0.50737800 | -2.71441600 |
| C | 3.36465000  | -3.70863200 | -1.47644900 | H | -0.98170300 | -1.24138100 | -4.27806800 |
| H | 2.90209100  | -4.24419100 | -0.64673200 | H | -1.63055600 | -2.23791700 | -2.96939900 |
| H | 3.65476500  | -4.42296000 | -2.25757000 | C | -1.79874100 | 1.92683800  | -0.28435600 |
| H | 4.27052100  | -3.22689100 | -1.10256600 | C | -1.09201200 | 0.72761800  | -0.12110700 |
| C | 2.69934000  | 4.63842200  | 2.42311900  | C | -1.75042500 | -0.41139500 | 0.59875600  |
| C | 1.77965100  | 4.37874000  | 1.40625000  | C | -1.77934200 | -1.73258600 | 0.14359900  |
| C | 2.13130400  | 4.54498500  | 0.06027000  | C | -2.36154100 | -0.13388200 | 1.83506900  |
| C | 3.43108600  | 4.96951100  | -0.24117900 | C | -2.38328900 | -2.74583600 | 0.88739700  |
| C | 4.35435800  | 5.23247000  | 0.77286700  | H | -1.30892100 | -1.98154900 | -0.79175800 |
| C | 3.99065700  | 5.06950700  | 2.11134900  | C | -2.98099900 | -1.13824900 | 2.57657900  |
| H | 2.40769700  | 4.49710600  | 3.46025800  | H | -2.35194300 | 0.88408700  | 2.21019000  |
| H | 0.78283800  | 4.02626700  | 1.65471500  | C | -2.99359700 | -2.45473200 | 2.10724200  |
| H | 3.72381700  | 5.08517700  | -1.28179200 | H | -2.37224800 | -3.76432700 | 0.51010600  |
| H | 5.35929100  | 5.55730700  | 0.51662000  | H | -3.43808600 | -0.89473100 | 3.53169900  |
| H | 4.70816600  | 5.26930800  | 2.90226600  | H | -3.46754600 | -3.24109500 | 2.68730000  |
| C | 1.11933800  | 4.29128800  | -1.04983600 | N | -3.18956000 | 2.07809600  | -0.06933800 |
| H | 0.46972400  | 5.17014500  | -1.15550800 | N | -3.87583000 | 1.17138000  | -0.63084200 |
| H | 1.66535300  | 4.17180200  | -1.99222300 | N | -5.19332600 | 1.21393700  | -0.42822600 |
| C | 0.27246100  | 3.07079400  | -0.80625400 | C | -5.92004200 | 0.06463800  | -0.99953400 |
| C | -1.07563400 | 3.10612800  | -0.57915300 | H | -6.96311300 | 0.20328800  | -0.70072500 |
| H | -1.62589100 | 4.04363100  | -0.61190200 | C | -5.84585300 | 0.09351400  | -2.53101500 |
| C | 0.95574300  | 1.79454600  | -0.81607400 | H | -4.80378900 | 0.00740400  | -2.85182700 |
| N | 0.23950400  | 0.66267100  | -0.44510700 | H | -6.24970100 | 1.03139100  | -2.92400200 |
| O | 2.16834800  | 1.71341600  | -1.13881500 | C | -5.42048000 | -1.26776000 | -0.42721600 |
| C | 1.13126100  | -2.80935000 | 1.66372200  | H | -4.37956600 | -1.43456400 | -0.71013800 |
| C | 1.09125500  | -2.90020600 | 3.20876400  | H | -5.46701100 | -1.27254800 | 0.66445100  |
| C | 0.21443600  | -4.10970000 | 3.58674800  | C | -5.81632500 | 2.12000000  | 0.55527600  |
| H | 0.24717300  | -4.27581900 | 4.66943000  | H | -5.05341000 | 2.87792800  | 0.74169900  |
| H | -0.82725500 | -3.93402700 | 3.29954600  | C | -7.05595800 | 2.80923500  | -0.02437300 |
| H | 0.56474000  | -5.00998800 | 3.07758500  | H | -6.81614900 | 3.31253300  | -0.96543300 |
| C | 0.54601600  | -1.63261500 | 3.88310700  | H | -7.42644600 | 3.55845100  | 0.68289600  |
| H | 0.43007500  | -1.81106100 | 4.95837800  | H | -7.87381300 | 2.10438500  | -0.20988800 |
| H | 1.22306100  | -0.78318800 | 3.76589100  | C | -6.10627200 | 1.38405200  | 1.87140500  |
| H | -0.42650700 | -1.35479900 | 3.47284900  | H | -5.19583400 | 0.91242300  | 2.25140500  |
| C | 2.54829100  | -3.15000100 | 3.65698000  | H | -6.47914400 | 2.08506100  | 2.62577200  |
| H | 2.59494600  | -3.26192100 | 4.74610300  | H | -6.86474800 | 0.60515400  | 1.73439600  |
| H | 2.94396600  | -4.05712300 | 3.19221900  | H | -6.02677900 | -2.09713200 | -0.80702300 |
| H | 3.19232800  | -2.30883000 | 3.37555900  | H | -6.41329500 | -0.73895500 | -2.95982600 |
| O | 0.94800500  | -1.62289900 | 1.14895700  | C | 3.18655400  | 0.45805200  | 1.11972800  |
| O | 1.35687600  | -3.82905200 | 1.00806800  | O | 3.28963200  | -0.43853400 | 0.26743600  |
| H | 4.81197800  | -1.28619300 | -1.99693800 | O | 2.14797200  | 0.57052000  | 1.91989700  |
| H | 4.44795900  | -0.67951100 | -3.62888600 | H | 1.52956100  | -0.20013300 | 1.72999800  |

|               |             |             |             |   |             |             |             |
|---------------|-------------|-------------|-------------|---|-------------|-------------|-------------|
| C             | 4.22832900  | 1.51919500  | 1.28242600  | O | 1.15806800  | 2.89610900  | -0.44777100 |
| H             | 5.19872700  | 1.14044900  | 0.95958000  | C | 2.83475700  | -2.21328000 | 1.15734200  |
| H             | 3.92827900  | 2.33795500  | 0.62039600  | C | 2.94207500  | -2.54699900 | 2.66714000  |
| H             | 4.26501900  | 1.89491100  | 2.30480900  | C | 2.72459200  | -4.06391800 | 2.82759000  |
| <b>TS17a'</b> |             |             |             |   |             |             |             |
| C             | 0.85470700  | -0.88358900 | -2.70301500 | H | 2.89065800  | -4.36414200 | 3.86872000  |
| C             | 1.35372800  | 0.47046100  | -2.92014600 | H | 1.69888200  | -4.33815400 | 2.55794200  |
| C             | 2.76188300  | 0.45426000  | -2.75935000 | H | 3.41287200  | -4.61882700 | 2.18490700  |
| C             | 3.16332600  | -0.90540000 | -2.42165800 | C | 1.93088000  | -1.76793400 | 3.51811300  |
| C             | 1.97300100  | -1.73408900 | -2.45170900 | H | 2.06099600  | -2.02657000 | 4.57608600  |
| Rh            | 1.88543900  | -0.20616400 | -0.86059400 | H | 2.05705800  | -0.68974000 | 3.40084900  |
| C             | 3.69184100  | 1.62341700  | -2.82729300 | H | 0.90705200  | -2.00793600 | 3.22977000  |
| C             | 0.51844100  | 1.63675200  | -3.34119300 | C | 4.38136700  | -2.18139400 | 3.08803300  |
| H             | 0.53682500  | 1.72490800  | -4.43454500 | H | 4.54231600  | -2.43078900 | 4.14300700  |
| H             | -0.51954000 | 1.51538400  | -3.02759500 | H | 5.10961100  | -2.72264700 | 2.47896700  |
| H             | 0.89391800  | 2.56417400  | -2.90723500 | H | 4.56273000  | -1.10730300 | 2.96366900  |
| C             | -0.57908900 | -1.28747400 | -2.86692300 | O | 1.93770300  | -1.32248100 | 0.86586000  |
| C             | 1.95043500  | -3.21697400 | -2.26057600 | O | 3.58791700  | -2.78289200 | 0.35865700  |
| H             | 0.95458500  | -3.57127200 | -1.98513900 | H | 4.27864600  | 1.68415000  | -1.90607400 |
| H             | 2.23667800  | -3.70952200 | -3.19867000 | H | 4.37960900  | 1.51506400  | -3.67358700 |
| H             | 2.64937500  | -3.49911900 | -1.47245000 | H | 3.14360000  | 2.55997600  | -2.93373700 |
| C             | 4.56897400  | -1.38200300 | -2.25126500 | H | -1.24162500 | -0.74455900 | -2.18667300 |
| H             | 4.61509000  | -2.11708200 | -1.44635200 | H | -0.90804200 | -1.07918500 | -3.89202800 |
| H             | 4.92864700  | -1.83405600 | -3.18482400 | H | -0.71955400 | -2.35353400 | -2.68151500 |
| H             | 5.22909500  | -0.54926800 | -1.99962000 | C | -2.28472300 | 0.77587100  | -0.06723800 |
| C             | -2.60552600 | 6.82817200  | 1.33710900  | C | -1.09585400 | 0.26628000  | 0.41382000  |
| C             | -2.50695800 | 5.93664300  | 0.26664400  | C | -1.11760000 | -1.00485300 | 1.20226900  |
| C             | -1.29869000 | 5.29044500  | -0.01902800 | C | -0.68864000 | -2.23095300 | 0.68665400  |
| C             | -0.18442000 | 5.54922200  | 0.79298500  | C | -1.71016200 | -0.97904700 | 2.47274600  |
| C             | -0.28308400 | 6.43769600  | 1.86371500  | C | -0.84584900 | -3.40624300 | 1.41908600  |
| C             | -1.49230000 | 7.08152200  | 2.13965900  | H | -0.22915800 | -2.26359100 | -0.29141700 |
| H             | -3.55054100 | 7.32417300  | 1.54190400  | C | -1.87328000 | -2.15411300 | 3.20839600  |
| H             | -3.37802700 | 5.74236200  | -0.35532500 | H | -2.06162500 | -0.03298800 | 2.87265100  |
| H             | 0.74753200  | 5.03510700  | 0.58077500  | C | -1.44468600 | -3.37425300 | 2.68026400  |
| H             | 0.58778900  | 6.62832300  | 2.48516800  | H | -0.50460400 | -4.34848800 | 1.00022100  |
| H             | -1.56567900 | 7.77466000  | 2.97306600  | H | -2.33041000 | -2.11468300 | 4.19285600  |
| C             | -1.20519100 | 4.29701400  | -1.16766400 | H | -1.56774100 | -4.29060100 | 3.25025400  |
| H             | -2.05313000 | 4.44250900  | -1.84531900 | N | -3.52228300 | 0.09131100  | 0.04980000  |
| H             | -0.28595500 | 4.47982700  | -1.73276900 | N | -3.53673400 | -0.99096500 | -0.61228000 |
| C             | -1.19533200 | 2.86561600  | -0.68024000 | N | -4.62056800 | -1.74754300 | -0.48649200 |
| C             | -2.32063700 | 2.10541500  | -0.58053300 | C | -4.60692600 | -2.97788400 | -1.29807600 |
| H             | -3.28684100 | 2.50255500  | -0.88292300 | H | -5.53010900 | -3.50375900 | -1.03765800 |
| C             | 0.08645200  | 2.29024000  | -0.29384900 | C | -4.64884000 | -2.63808200 | -2.79328300 |
| N             | 0.08943400  | 0.98462100  | 0.26422700  | H | -3.75205200 | -2.07797600 | -3.07383600 |
|               |             |             |             | H | -5.52373700 | -2.02532400 | -3.03009100 |

|             |             |             |             |   |             |             |             |
|-------------|-------------|-------------|-------------|---|-------------|-------------|-------------|
| C           | -3.42025600 | -3.88176200 | -0.94608600 | C | 7.35781500  | -3.78437900 | 0.75636300  |
| H           | -2.48120700 | -3.38289100 | -1.19420000 | C | 6.49848800  | -3.20469100 | -0.17954500 |
| H           | -3.39960400 | -4.10651300 | 0.12300100  | C | 5.12599200  | -3.47857000 | -0.15849900 |
| C           | -5.66453500 | -1.49293200 | 0.52632400  | C | 4.62345400  | -4.34457400 | 0.82389000  |
| H           | -5.41043700 | -0.51291400 | 0.93332400  | C | 5.48112400  | -4.92226900 | 1.76015500  |
| C           | -7.05500200 | -1.41041800 | -0.11239300 | C | 6.85061400  | -4.64583300 | 1.73021100  |
| H           | -7.07382100 | -0.65622300 | -0.90440200 | H | 8.42148100  | -3.56419700 | 0.72259800  |
| H           | -7.79559600 | -1.13314900 | 0.64468700  | H | 6.89880200  | -2.53412500 | -0.93680100 |
| H           | -7.36860200 | -2.36850400 | -0.54131000 | H | 3.55629000  | -4.54147700 | 0.84953700  |
| C           | -5.58103300 | -2.53028500 | 1.65491300  | H | 5.07898500  | -5.59227100 | 2.51545800  |
| H           | -4.58137900 | -2.53068000 | 2.09912600  | H | 7.51660100  | -5.09954300 | 2.45894500  |
| H           | -6.30994100 | -2.29356800 | 2.43716700  | C | 4.18952200  | -2.82085100 | -1.16141900 |
| H           | -5.80047700 | -3.54090700 | 1.29232200  | H | 4.76720600  | -2.45645500 | -2.01739400 |
| H           | -3.48004800 | -4.82137200 | -1.50519500 | H | 3.47164900  | -3.56200900 | -1.52799600 |
| H           | -4.68984100 | -3.55209800 | -3.39450000 | C | 3.41287300  | -1.67459800 | -0.55536000 |
| C           | 2.98846500  | 1.39526000  | 1.41551300  | C | 3.79495800  | -0.36479800 | -0.66465000 |
| O           | 3.26799700  | 0.93086700  | 0.26660300  | H | 4.68845400  | -0.10240000 | -1.22628600 |
| O           | 1.85385700  | 1.34698200  | 1.97966100  | C | 2.19066600  | -1.99929600 | 0.16320100  |
| H           | 0.93822400  | 1.01575100  | 1.16379700  | N | 1.56614900  | -0.91576500 | 0.76909300  |
| C           | 4.11118700  | 2.05066500  | 2.18728800  | O | 1.68811900  | -3.13557400 | 0.23949400  |
| H           | 5.03377100  | 2.05973300  | 1.60695400  | C | -4.70205300 | -0.13999800 | 0.99809500  |
| H           | 3.81640000  | 3.07073900  | 2.44814700  | C | -5.25976300 | 0.63111300  | 2.22015100  |
| H           | 4.26435900  | 1.50083100  | 3.12100100  | C | -5.15873200 | 2.13320200  | 1.87379200  |
| <b>18a'</b> |             |             |             |   |             |             |             |
| C           | -1.77303000 | 0.33463600  | -2.09287400 | H | -5.52192300 | 2.74442400  | 2.70781600  |
| C           | -1.12856100 | -0.94280700 | -2.37793600 | H | -4.12375100 | 2.41735100  | 1.66168600  |
| C           | -2.14619500 | -1.90374900 | -2.62313100 | H | -5.76382600 | 2.37004200  | 0.99150900  |
| C           | -3.43861100 | -1.23228600 | -2.52075700 | C | -4.42917400 | 0.32166900  | 3.47855700  |
| C           | -3.19390100 | 0.15330800  | -2.24225600 | H | -4.81733800 | 0.88299800  | 4.33657800  |
| Rh          | -2.44684600 | -1.08841700 | -0.61415200 | H | -4.47915700 | -0.74493800 | 3.72287500  |
| C           | -1.95921700 | -3.36266300 | -2.90295400 | H | -3.37836200 | 0.57962000  | 3.33411500  |
| C           | 0.34475400  | -1.19921400 | -2.38891300 | C | -6.72957000 | 0.24863000  | 2.44523400  |
| H           | 0.71058900  | -1.21585200 | -3.42275400 | H | -7.14927200 | 0.83100700  | 3.27359800  |
| H           | 0.89125300  | -0.42077800 | -1.85551300 | H | -7.32074900 | 0.43166000  | 1.54537200  |
| H           | 0.58522500  | -2.15710600 | -1.92326100 | H | -6.82297500 | -0.81397200 | 2.68923200  |
| C           | -1.08308300 | 1.63916900  | -1.84192900 | O | -3.39969400 | -0.12886200 | 0.93967000  |
| C           | -4.23326600 | 1.21878400  | -2.09707300 | O | -5.45797300 | -0.64403500 | 0.16311600  |
| H           | -3.90213400 | 1.99729400  | -1.40618800 | H | -2.57395600 | -3.96404400 | -2.22733700 |
| H           | -4.42153700 | 1.68638000  | -3.07152100 | H | -2.25382300 | -3.59527100 | -3.93279300 |
| H           | -5.16171200 | 0.79886700  | -1.71098600 | H | -0.91879100 | -3.66277600 | -2.76669700 |
| C           | -4.77791500 | -1.86454200 | -2.72807100 | H | -0.07548700 | 1.50659200  | -1.44321500 |
| H           | -5.46333500 | -1.53837900 | -1.94332300 | H | -1.00302500 | 2.20886100  | -2.77608100 |
| H           | -5.18256700 | -1.58250500 | -3.70800900 | H | -1.64248900 | 2.24604600  | -1.12663800 |
| H           | -4.70581900 | -2.95335000 | -2.68981600 | C | 3.04912100  | 0.70680500  | -0.09644900 |
|             |             |             |             | C | 1.93860300  | 0.40282800  | 0.67580000  |

|             |             |             |             |    |             |             |             |
|-------------|-------------|-------------|-------------|----|-------------|-------------|-------------|
| C           | 1.16474500  | 1.38368500  | 1.48090500  | C  | 2.14611900  | -1.62562000 | -0.39280700 |
| C           | -0.23725000 | 1.36428700  | 1.51522300  | C  | 0.85459700  | -2.27912000 | -0.32315900 |
| C           | 1.84635000  | 2.32254900  | 2.27629700  | C  | 0.04286600  | -1.76810400 | -1.41729100 |
| C           | -0.93949000 | 2.27263900  | 2.30902800  | C  | 0.77318800  | -0.73808100 | -2.06616000 |
| H           | -0.79517200 | 0.64530200  | 0.93185600  | Rh | 0.53065300  | -0.21503200 | 0.07026200  |
| C           | 1.14271700  | 3.22327900  | 3.07124300  | C  | 0.47236600  | -3.39141400 | 0.60267500  |
| H           | 2.93110800  | 2.33985000  | 2.26202000  | C  | 3.32111700  | -1.93235700 | 0.47831800  |
| C           | -0.25594100 | 3.20612700  | 3.08761100  | H  | 3.86653200  | -2.78945500 | 0.06320300  |
| H           | -2.02303900 | 2.23132800  | 2.31519800  | H  | 3.98520500  | -1.07389800 | 0.55591500  |
| H           | 1.68717400  | 3.93454100  | 3.68640800  | H  | 2.99845600  | -2.19190400 | 1.48895400  |
| H           | -0.80444500 | 3.90917000  | 3.70780700  | C  | 3.17047900  | 0.33477700  | -1.75423400 |
| N           | 3.51238300  | 2.02697700  | -0.31077100 | C  | 0.30716100  | 0.06462800  | -3.24023200 |
| N           | 2.57688500  | 2.79290500  | -0.70267100 | H  | 0.72715800  | 1.07176800  | -3.22810500 |
| N           | 2.86022500  | 4.08307800  | -0.80924300 | H  | 0.61342400  | -0.41803200 | -4.17641600 |
| C           | 1.71791200  | 4.91709800  | -1.23243400 | H  | -0.77940300 | 0.16277000  | -3.23919100 |
| H           | 2.08623700  | 5.94687900  | -1.20599900 | C  | -1.33485700 | -2.23916100 | -1.75872600 |
| C           | 1.31848200  | 4.58566500  | -2.67528100 | H  | -1.93695500 | -1.43687900 | -2.18554400 |
| H           | 1.00746100  | 3.54034900  | -2.74421200 | H  | -1.27728400 | -3.06600700 | -2.47710100 |
| H           | 2.16005400  | 4.73847500  | -3.35760800 | H  | -1.85078700 | -2.60417900 | -0.86836200 |
| C           | 0.54194600  | 4.79639100  | -0.25457000 | C  | -2.43307400 | 0.16016200  | 0.19724500  |
| H           | 0.17834900  | 3.76765100  | -0.21582700 | C  | -3.81709200 | -0.10078000 | 0.82414600  |
| H           | 0.84374600  | 5.07429400  | 0.75793700  | C  | -4.67724500 | -0.86533600 | -0.20137700 |
| C           | 4.13102500  | 4.67517200  | -0.34653200 | H  | -5.68885600 | -1.01268300 | 0.19215400  |
| H           | 4.75456700  | 3.81504600  | -0.09611900 | H  | -4.74002400 | -0.31216500 | -1.14112100 |
| C           | 4.81393400  | 5.46549400  | -1.46797700 | H  | -4.25421600 | -1.85409300 | -0.41346500 |
| H           | 4.97247200  | 4.83315000  | -2.34612000 | C  | -4.44786900 | 1.28159300  | 1.09996200  |
| H           | 5.78746200  | 5.83162700  | -1.12635300 | H  | -5.45761100 | 1.16079500  | 1.50751900  |
| H           | 4.22385300  | 6.33674000  | -1.77284500 | H  | -3.85363400 | 1.84397000  | 1.82839000  |
| C           | 3.90868000  | 5.51046200  | 0.92199600  | H  | -4.50953200 | 1.86656700  | 0.17836500  |
| H           | 3.42678700  | 4.90827100  | 1.69723100  | C  | -3.69944500 | -0.90233300 | 2.12737100  |
| H           | 4.86705800  | 5.87322300  | 1.30720100  | H  | -4.69384600 | -1.06404800 | 2.55835500  |
| H           | 3.27672100  | 6.38355500  | 0.72561500  | H  | -3.23931500 | -1.87898800 | 1.94814600  |
| H           | -0.27923500 | 5.44972200  | -0.56705100 | H  | -3.07936900 | -0.37814800 | 2.85795500  |
| H           | 0.48687800  | 5.21960700  | -2.99940600 | O  | -1.41760300 | -0.16102400 | 0.89124900  |
| C           | -1.66363900 | -2.74806700 | 1.18019700  | O  | -2.40439500 | 0.68015500  | -0.95554000 |
| O           | -2.69342300 | -2.99049400 | 0.48357700  | H  | -0.58414000 | -3.32466000 | 0.87274800  |
| O           | -1.05846000 | -1.63633600 | 0.98808500  | H  | 0.64779200  | -4.36856000 | 0.13562600  |
| H           | 0.66457500  | -1.15635600 | 1.19656000  | H  | 1.05206500  | -3.34407600 | 1.52632400  |
| C           | -1.10621600 | -3.72093800 | 2.17505800  | H  | 3.54211500  | 0.78702800  | -0.83122400 |
| H           | -1.71283100 | -4.62574100 | 2.21895800  | H  | 3.99431400  | -0.17318100 | -2.26920800 |
| H           | -0.08187600 | -3.94888700 | 1.86057600  | H  | 2.80352200  | 1.12934700  | -2.40700700 |
| H           | -1.06142000 | -3.24990100 | 3.16150900  | C  | 2.22179500  | 0.71250900  | 2.26484400  |
| <b>19a'</b> |             |             |             | O  | 1.08113100  | 0.12434600  | 2.02672900  |
| C           | 2.08009700  | -0.63225900 | -1.41455100 | O  | 3.11110900  | 0.95909900  | 1.44609600  |

|               |             |             |             |             |             |             |             |
|---------------|-------------|-------------|-------------|-------------|-------------|-------------|-------------|
| C             | 2.36872000  | 1.11083300  | 3.73066400  | H           | -4.66607800 | -2.09765100 | 1.77721100  |
| H             | 3.40857000  | 1.36010900  | 3.94835400  | H           | -3.18818600 | -2.48984400 | 0.87780900  |
| H             | 1.74043000  | 1.98712500  | 3.92213400  | H           | -3.07837300 | -1.54690800 | 2.36304400  |
| H             | 2.02005900  | 0.30941400  | 4.38711200  | O           | -1.45421300 | -0.38777700 | 0.71007000  |
| C             | 0.11662000  | 2.78976100  | -0.81585400 | O           | -2.52517600 | 1.15563300  | -0.54105800 |
| O             | 0.63015800  | 1.98081700  | -0.02739800 | H           | -1.09320900 | -2.96949700 | -0.54508300 |
| O             | -0.91797800 | 2.55780400  | -1.57053400 | H           | -0.13322700 | -3.85778600 | -1.74693100 |
| H             | -1.43877700 | 1.68289200  | -1.30486400 | H           | 0.42275100  | -3.72857300 | -0.06743100 |
| C             | 0.69730400  | 4.17447000  | -0.95571400 | H           | 3.92083200  | 0.39254000  | -0.20409600 |
| H             | 0.84742500  | 4.40423400  | -2.01437100 | H           | 4.28693600  | 0.13511100  | -1.93843300 |
| H             | -0.01683100 | 4.90468600  | -0.56255000 | H           | 3.39071700  | 1.56798700  | -1.40677500 |
| H             | 1.63766600  | 4.24209200  | -0.41006600 | C           | 2.10939000  | -0.29789000 | 2.49474800  |
| <b>TS20a'</b> |             |             |             | O           | 0.95305400  | -0.58285400 | 1.96335400  |
| C             | 2.25975600  | -0.25257800 | -1.36443400 | O           | 3.12621100  | 0.06521900  | 1.89941300  |
| C             | 1.99860800  | -1.57430700 | -0.85949800 | C           | 2.09731300  | -0.44959900 | 4.01328000  |
| C             | 0.65032800  | -1.92738700 | -1.21428600 | H           | 3.11926500  | -0.45327700 | 4.39574400  |
| C             | 0.11709600  | -0.85804600 | -2.05231700 | H           | 1.55257500  | 0.39539700  | 4.44720100  |
| C             | 1.09571200  | 0.16411500  | -2.13972200 | H           | 1.57364300  | -1.36286000 | 4.30742400  |
| Rh            | 0.57037500  | -0.15188200 | -0.00890900 | C           | 0.16641100  | 2.87047300  | 0.13722600  |
| C             | -0.07562600 | -3.19281100 | -0.87686300 | O           | 0.72794200  | 1.87393400  | 0.66067000  |
| C             | 2.95281700  | -2.40898700 | -0.06727300 | O           | -0.83499500 | 2.83839200  | -0.65678400 |
| H             | 3.56205800  | -3.01299800 | -0.75135500 | H           | -1.58180000 | 1.88243500  | -0.60040900 |
| H             | 3.60314900  | -1.77747800 | 0.53748200  | C           | 0.71357700  | 4.24168000  | 0.47086000  |
| H             | 2.42157900  | -3.08630000 | 0.60427300  | H           | 0.81955800  | 4.82488800  | -0.44799200 |
| C             | 3.54251500  | 0.50263100  | -1.22108700 | H           | -0.00687000 | 4.76582800  | 1.10692600  |
| C             | 0.97229600  | 1.44085500  | -2.91086300 | H           | 1.66908500  | 4.16094200  | 0.98877300  |
| H             | 1.57486200  | 2.23256500  | -2.46183200 | <b>21a'</b> |             |             |             |
| H             | 1.32562700  | 1.29230800  | -3.93863500 | C           | 2.39603000  | 0.36208900  | -1.19237600 |
| H             | -0.05964800 | 1.79127300  | -2.94119900 | C           | 1.83470400  | -0.88813800 | -1.66573100 |
| C             | -1.22640300 | -0.86371600 | -2.71155200 | C           | 0.51060000  | -0.62603100 | -2.12953600 |
| H             | -1.66518800 | 0.13415000  | -2.73941000 | C           | 0.26690300  | 0.81305200  | -2.02460800 |
| H             | -1.13583400 | -1.23713400 | -3.73894600 | C           | 1.42986900  | 1.41115100  | -1.47441900 |
| H             | -1.92193900 | -1.51566900 | -2.17977100 | Rh          | 0.62719300  | -0.05717200 | -0.03601800 |
| C             | -2.49243800 | 0.14845700  | 0.25061100  | C           | -0.47104400 | -1.61554600 | -2.67365500 |
| C             | -3.85824200 | -0.42291800 | 0.66404300  | C           | 2.53143000  | -2.21052000 | -1.63230000 |
| C             | -4.68630700 | -0.68877100 | -0.60941100 | H           | 3.16250400  | -2.31641000 | -2.52365900 |
| H             | -5.68331000 | -1.05038800 | -0.33634600 | H           | 3.15317300  | -2.28245400 | -0.73949900 |
| H             | -4.79186500 | 0.22170600  | -1.20323800 | H           | 1.81740500  | -3.03642300 | -1.62055000 |
| H             | -4.21429400 | -1.45440300 | -1.23593200 | C           | 3.79272900  | 0.55787900  | -0.69648800 |
| C             | -4.55659500 | 0.65533700  | 1.52216100  | C           | 1.63277700  | 2.86713400  | -1.19796500 |
| H             | -5.55334100 | 0.31009500  | 1.81701800  | H           | 2.27614200  | 3.00780000  | -0.32670900 |
| H             | -3.98534800 | 0.86034500  | 2.43382800  | H           | 2.11859400  | 3.34514400  | -2.05708800 |
| H             | -4.65949900 | 1.58761800  | 0.96112800  | H           | 0.68530900  | 3.36718200  | -0.99752400 |
| C             | -3.68588700 | -1.71655200 | 1.47130100  | C           | -0.97363100 | 1.52655100  | -2.46473500 |

|           |             |             |             |   |             |             |             |
|-----------|-------------|-------------|-------------|---|-------------|-------------|-------------|
| H         | -1.18414400 | 2.38002100  | -1.81820600 | C | -5.42942300 | 0.43906500  | 0.02291700  |
| H         | -0.85680600 | 1.88905400  | -3.49348700 | C | -6.30474900 | 0.31089100  | 1.10177500  |
| H         | -1.84378200 | 0.86816800  | -2.43960700 | C | -6.50328300 | -0.93253400 | 1.70752700  |
| C         | -2.56482100 | -0.02182900 | 0.29593600  | H | -5.96724400 | -3.02195600 | 1.68902500  |
| C         | -3.88999900 | -0.78278800 | 0.18444900  | H | -4.41073300 | -2.79463500 | -0.22357500 |
| C         | -4.53912100 | -0.39355400 | -1.16265000 | H | -5.25580200 | 1.40459000  | -0.44167300 |
| H         | -5.50054600 | -0.90581400 | -1.27233500 | H | -6.83468500 | 1.18528100  | 1.47015000  |
| H         | -4.70829500 | 0.68444800  | -1.22013900 | H | -7.18768700 | -1.03012800 | 2.54572700  |
| H         | -3.90640600 | -0.69042700 | -2.00756300 | C | -3.75745900 | -0.53767200 | -1.62093500 |
| C         | -4.80345300 | -0.34698100 | 1.34953600  | H | -3.59819200 | -1.51486700 | -2.08862100 |
| H         | -5.76857000 | -0.85866200 | 1.27379500  | H | -4.17585700 | 0.13491100  | -2.37625200 |
| H         | -4.35730100 | -0.60788100 | 2.31496100  | C | -2.42734900 | 0.02384400  | -1.17245200 |
| H         | -4.97511200 | 0.73159800  | 1.32991800  | C | -1.36590400 | -0.75717800 | -0.81043600 |
| C         | -3.63816700 | -2.29574500 | 0.23852100  | H | -1.44257600 | -1.84026200 | -0.86896200 |
| H         | -4.59077900 | -2.83100700 | 0.16909100  | C | -2.31394400 | 1.47506400  | -1.08871600 |
| H         | -2.99617800 | -2.62199200 | -0.58417300 | N | -1.07792000 | 1.92136800  | -0.60909000 |
| H         | -3.14320700 | -2.57889700 | 1.17072300  | O | -3.19276300 | 2.29225800  | -1.37992800 |
| O         | -1.48943900 | -0.63877200 | 0.35801000  | C | -0.11783100 | -0.22263700 | -0.37034600 |
| O         | -2.68700500 | 1.27375300  | 0.29351600  | C | 0.00004300  | 1.14737200  | -0.23756900 |
| H         | -1.46357800 | -1.44204300 | -2.25090000 | C | 1.16177800  | 1.87050500  | 0.32954500  |
| H         | -0.54316500 | -1.52813500 | -3.76427400 | C | 1.66662800  | 3.02115400  | -0.29473300 |
| H         | -0.18113000 | -2.63862200 | -2.42903000 | C | 1.73498400  | 1.45076000  | 1.54263800  |
| H         | 4.03980200  | -0.22441400 | 0.02160200  | C | 2.72733500  | 3.72964400  | 0.27383300  |
| H         | 4.49678900  | 0.52858100  | -1.53804800 | H | 1.24391300  | 3.34662900  | -1.24145500 |
| H         | 3.90092000  | 1.52367600  | -0.19885400 | C | 2.78894800  | 2.16133900  | 2.10871000  |
| C         | 2.00574300  | -1.93200500 | 1.83643600  | H | 1.34569300  | 0.56319400  | 2.03026500  |
| O         | 0.85772300  | -1.55469000 | 1.35529000  | C | 3.29158200  | 3.30326800  | 1.47630200  |
| O         | 3.12450500  | -1.58914500 | 1.44406400  | H | 3.11320300  | 4.61258600  | -0.22732900 |
| C         | 1.84779800  | -2.89236100 | 3.01279600  | H | 3.21602800  | 1.82902200  | 3.05073600  |
| H         | 2.80754000  | -3.35362000 | 3.25079900  | H | 4.11571600  | 3.85480500  | 1.91880300  |
| H         | 1.48920700  | -2.33106000 | 3.88177100  | N | 0.91472900  | -1.13635900 | -0.05469000 |
| H         | 1.10043600  | -3.65750200 | 2.78653400  | N | 2.02478600  | -0.79385800 | -0.57106800 |
| C         | 0.13696300  | 2.31651500  | 1.70647300  | N | 3.08834700  | -1.50984500 | -0.24196700 |
| O         | 0.75407200  | 1.20580100  | 1.65095400  | C | 4.33850000  | -1.05923600 | -0.88618300 |
| O         | -0.77146600 | 2.70310200  | 0.91706900  | H | 5.11366500  | -1.73896100 | -0.51983300 |
| H         | -1.79565800 | 1.79436400  | 0.49803800  | C | 4.24539600  | -1.20677800 | -2.40943100 |
| C         | 0.55039700  | 3.25871400  | 2.82239100  | H | 3.45140400  | -0.56387000 | -2.79852500 |
| H         | 0.83733400  | 4.22026200  | 2.38569400  | H | 4.01933100  | -2.24050300 | -2.68777000 |
| H         | -0.31100600 | 3.44347500  | 3.47117400  | C | 4.69785300  | 0.37075400  | -0.46296000 |
| H         | 1.37545200  | 2.84840400  | 3.40466600  | H | 3.91347200  | 1.06628600  | -0.77136200 |
| <b>P2</b> |             |             |             | H | 4.80093400  | 0.44464500  | 0.62252800  |
| C         | -5.81812600 | -2.04964100 | 1.22702700  | C | 3.06910500  | -2.57827500 | 0.77563600  |
| C         | -4.94125200 | -1.92061800 | 0.14791900  | H | 2.02015800  | -2.65236500 | 1.06859500  |
| C         | -4.73908400 | -0.67925100 | -0.46676200 | C | 3.50676500  | -3.92071800 | 0.17860900  |



|           |             |             |             |             |             |             |             |
|-----------|-------------|-------------|-------------|-------------|-------------|-------------|-------------|
| H         | 2.88291100  | -4.18326900 | -0.68038000 | C           | -0.75480500 | -1.48395200 | -0.34875500 |
| H         | 3.41181900  | -4.71246000 | 0.92886300  | H           | -1.03136900 | -2.40922400 | 0.16302500  |
| H         | 4.55225200  | -3.90038200 | -0.14837000 | C           | -1.12408300 | 0.43350300  | -1.68648100 |
| C         | 3.89772700  | -2.17416600 | 2.00255100  | N           | 0.27334800  | 0.55100500  | -1.54146900 |
| H         | 3.54897200  | -1.21799200 | 2.40366000  | O           | -1.87028700 | 1.34097000  | -2.04990200 |
| H         | 3.80439100  | -2.93357600 | 2.78556200  | C           | 0.35335100  | 2.23515500  | 0.04718200  |
| H         | 4.96142300  | -2.07642200 | 1.76006500  | C           | 0.18899200  | 3.71376200  | 0.36081500  |
| H         | 5.64199100  | 0.67740200  | -0.92477500 | C           | 1.05851400  | 4.57377000  | -0.57537400 |
| H         | 5.19073400  | -0.91767800 | -2.87950800 | H           | 0.90474900  | 5.63140400  | -0.33894900 |
| H         | -1.03216500 | 2.92302400  | -0.46525100 | H           | 2.12257600  | 4.34864600  | -0.44641100 |
| <b>7'</b> |             |             |             | H           | 0.79769500  | 4.40908800  | -1.62245000 |
| C         | 2.42756000  | -1.45211300 | 1.52052500  | C           | 0.55067400  | 3.97335800  | 1.83078400  |
| C         | 2.10385800  | -2.44928300 | 0.56611300  | H           | 0.36268800  | 5.02337100  | 2.07555900  |
| C         | 2.49904200  | -1.94069800 | -0.73478200 | H           | -0.04319600 | 3.34545100  | 2.49837900  |
| C         | 3.25392300  | -0.70157700 | -0.52129400 | H           | 1.60930500  | 3.76393400  | 2.01884100  |
| C         | 3.18546500  | -0.39082900 | 0.84344300  | C           | -1.31365500 | 4.00514200  | 0.10637900  |
| Rh        | 1.01473000  | -0.60174200 | 0.00342900  | H           | -1.50327700 | 5.07393400  | 0.25002700  |
| C         | 1.44619600  | -3.76920500 | 0.82551000  | H           | -1.59828400 | 3.71637000  | -0.90874300 |
| H         | 2.20006900  | -4.55334800 | 0.96529600  | H           | -1.94092400 | 3.44380200  | 0.80550300  |
| H         | 0.82330500  | -3.73685500 | 1.72265000  | O           | 0.26453700  | 1.34540800  | 0.90625200  |
| H         | 0.80843000  | -4.06546300 | -0.01104800 | O           | 0.53978700  | 1.97422900  | -1.24016200 |
| C         | 3.70039800  | 0.83062500  | 1.54323700  | C           | 2.18239200  | -1.49133300 | 2.99856200  |
| H         | 2.89509500  | 1.32345800  | 2.09822700  | H           | 1.39780600  | -2.20585500 | 3.25568000  |
| H         | 4.48624900  | 0.57073500  | 2.26238100  | H           | 3.09352200  | -1.77917800 | 3.53869500  |
| H         | 4.11334800  | 1.55525800  | 0.83827300  | H           | 1.87296200  | -0.50944200 | 3.36715400  |
| C         | 3.86782800  | 0.09986000  | -1.62849900 | C           | 2.41773500  | -2.67366300 | -2.03928900 |
| H         | 4.23367000  | 1.06500300  | -1.27243500 | H           | 3.32167200  | -3.27349600 | -2.20696200 |
| H         | 4.71081100  | -0.43857700 | -2.07759500 | H           | 1.55527600  | -3.34293400 | -2.06257800 |
| H         | 3.13156400  | 0.29072300  | -2.41536400 | H           | 2.31643100  | -1.97218300 | -2.87072300 |
| C         | -5.45323200 | -1.88092200 | 1.24756800  | <b>TS8'</b> |             |             |             |
| C         | -4.54830900 | -2.13954800 | 0.21415200  | C           | 3.06892500  | 0.87912200  | 1.18508500  |
| C         | -3.98573800 | -1.09329900 | -0.52494000 | C           | 3.06218600  | -0.50141100 | 1.46979800  |
| C         | -4.34628300 | 0.22625000  | -0.21013600 | C           | 3.27537600  | -1.20248300 | 0.20831300  |
| C         | -5.24874500 | 0.48517100  | 0.82032700  | C           | 3.55549100  | -0.20805500 | -0.81363100 |
| C         | -5.80627300 | -0.56671000 | 1.55418000  | C           | 3.37186500  | 1.06300200  | -0.22989200 |
| H         | -5.88187900 | -2.70667100 | 1.80953200  | Rh          | 1.33243300  | -0.19620100 | -0.02164300 |
| H         | -4.27806900 | -3.16647100 | -0.02211600 | C           | 2.87545800  | -1.16639800 | 2.79988200  |
| H         | -3.89954600 | 1.03649800  | -0.77889900 | H           | 3.84012900  | -1.47689800 | 3.21960500  |
| H         | -5.52062800 | 1.51186500  | 1.05179400  | H           | 2.39427600  | -0.49981900 | 3.51922800  |
| H         | -6.51034600 | -0.36225800 | 2.35613000  | H           | 2.25395800  | -2.06196300 | 2.70854700  |
| C         | -2.97248800 | -1.36591200 | -1.62370500 | C           | 3.44297300  | 2.40558700  | -0.89201400 |
| H         | -2.95715400 | -2.43717100 | -1.85241100 | H           | 2.53271800  | 2.98044200  | -0.69081400 |
| H         | -3.27053200 | -0.83558600 | -2.53471000 | H           | 4.29014500  | 2.98858700  | -0.51041800 |
| C         | -1.57741500 | -0.90727800 | -1.24374000 | H           | 3.54953900  | 2.31705400  | -1.97468100 |

|   |             |             |             |           |             |             |             |
|---|-------------|-------------|-------------|-----------|-------------|-------------|-------------|
| C | 3.82379900  | -0.52790700 | -2.25132600 | C         | 3.47179600  | -2.68123200 | 0.05241000  |
| H | 4.15734200  | 0.35395300  | -2.80210800 | H         | 4.51272900  | -2.95990000 | 0.26200100  |
| H | 4.59474300  | -1.29919600 | -2.34560100 | H         | 2.83051500  | -3.24112900 | 0.73725400  |
| H | 2.90739100  | -0.89767200 | -2.73123700 | H         | 3.23351100  | -3.00064900 | -0.96480600 |
| C | -5.07021600 | -0.72292300 | 1.71320300  | <b>9'</b> |             |             |             |
| C | -3.96290500 | -1.56991900 | 1.61686900  | C         | 3.02835000  | 1.18970100  | 0.88581700  |
| C | -3.37769500 | -1.84779100 | 0.37614400  | C         | 2.79664300  | -0.01133200 | 1.60189700  |
| C | -3.91610100 | -1.24979200 | -0.77348900 | C         | 3.13563700  | -1.11827900 | 0.71237800  |
| C | -5.02099400 | -0.40359900 | -0.67812300 | C         | 3.63688300  | -0.55801100 | -0.52113500 |
| C | -5.60403000 | -0.13782600 | 0.56432100  | C         | 3.52690400  | 0.85597100  | -0.42842000 |
| H | -5.51308000 | -0.52159300 | 2.68479700  | Rh        | 1.32366900  | -0.18770900 | -0.13582300 |
| H | -3.55156400 | -2.02366700 | 2.51562200  | C         | 2.36724600  | -0.14508300 | 3.03042100  |
| H | -3.45646800 | -1.44679500 | -1.73674200 | H         | 3.23765600  | -0.18969100 | 3.69681500  |
| H | -5.42833300 | 0.04910300  | -1.57789200 | H         | 1.74483000  | 0.69758200  | 3.34036200  |
| H | -6.46399100 | 0.52199400  | 0.63524700  | H         | 1.79045900  | -1.06087600 | 3.18385800  |
| C | -2.15802100 | -2.75145100 | 0.27486100  | C         | 3.85873800  | 1.86861700  | -1.48144500 |
| H | -2.01751800 | -3.29325600 | 1.21591300  | H         | 3.08030300  | 2.63538900  | -1.53781300 |
| H | -2.31375200 | -3.49109000 | -0.51943100 | H         | 4.80412100  | 2.37637500  | -1.25203100 |
| C | -0.91243700 | -1.96323800 | -0.05433500 | H         | 3.95159100  | 1.41054700  | -2.46775700 |
| C | -0.02649000 | -1.42456100 | 0.79947700  | C         | 4.06904500  | -1.37041700 | -1.69870100 |
| H | -0.05979000 | -1.56201800 | 1.88108300  | H         | 4.50711800  | -0.74680800 | -2.48012800 |
| C | -0.59393100 | -1.64713700 | -1.46036900 | H         | 4.80902900  | -2.12227100 | -1.40625600 |
| N | 0.58048000  | -0.79847100 | -1.59368500 | H         | 3.19948800  | -1.89088500 | -2.12429400 |
| O | -1.16543600 | -2.06371600 | -2.45236200 | C         | -5.21845700 | -0.62558200 | 1.52514200  |
| C | -0.94745200 | 1.51579000  | -0.54838900 | C         | -4.10259400 | -1.46445900 | 1.59641200  |
| C | -1.93451200 | 2.64737200  | -0.16985400 | C         | -3.37143500 | -1.78326300 | 0.44678900  |
| C | -2.97563800 | 2.82933800  | -1.28224700 | C         | -3.76816400 | -1.23649600 | -0.78255400 |
| H | -3.67463800 | 3.62655800  | -1.00636200 | C         | -4.88328500 | -0.40278500 | -0.85442800 |
| H | -2.49877600 | 3.09525500  | -2.22950600 | C         | -5.61344700 | -0.09402200 | 0.29733700  |
| H | -3.53904200 | 1.90690200  | -1.43690400 | H         | -5.77514800 | -0.38936800 | 2.42791700  |
| C | -1.13431700 | 3.94679600  | 0.04064500  | H         | -3.80031700 | -1.87874100 | 2.55562700  |
| H | -1.81254900 | 4.75694800  | 0.33025600  | H         | -3.19141300 | -1.45930600 | -1.67391800 |
| H | -0.38561000 | 3.82204500  | 0.82688800  | H         | -5.18021400 | 0.01095300  | -1.81392200 |
| H | -0.62331400 | 4.24951500  | -0.88024700 | H         | -6.47881600 | 0.55984000  | 0.23715500  |
| C | -2.62237200 | 2.22182800  | 1.14389100  | C         | -2.15487700 | -2.69310300 | 0.52358900  |
| H | -3.35091100 | 2.98436600  | 1.44170000  | H         | -2.05853200 | -3.09858700 | 1.53618900  |
| H | -3.15504300 | 1.27504600  | 1.02026200  | H         | -2.28790900 | -3.53785400 | -0.16317100 |
| H | -1.88848700 | 2.10544300  | 1.94532600  | C         | -0.88252700 | -1.98083400 | 0.12995900  |
| O | -0.00718000 | 1.32845600  | 0.33283100  | C         | -0.12792400 | -1.16161700 | 0.87268200  |
| O | -1.10343700 | 0.87341700  | -1.59365200 | H         | -0.30075100 | -0.91188300 | 1.91803900  |
| C | 2.76890000  | 2.01490600  | 2.11596900  | C         | -0.39983100 | -2.03474400 | -1.26907100 |
| H | 2.60767100  | 1.66924800  | 3.13889100  | N         | 0.85304300  | -1.38273200 | -1.44179500 |
| H | 3.59216000  | 2.73790000  | 2.12594800  | O         | -0.96254000 | -2.55006600 | -2.22386500 |
| H | 1.86364500  | 2.54028900  | 1.79019200  | C         | -0.99483700 | 1.51182600  | -0.69986400 |

|            |             |             |             |   |             |             |             |
|------------|-------------|-------------|-------------|---|-------------|-------------|-------------|
| C          | -1.92872800 | 2.66170200  | -0.24684300 | C | -4.37213300 | 4.24838300  | -0.80085800 |
| C          | -3.00059400 | 2.89273200  | -1.32096600 | C | -3.76263300 | 3.36520100  | -1.69415700 |
| H          | -3.69482800 | 3.67463100  | -0.99271300 | C | -2.45687300 | 2.90237200  | -1.48013000 |
| H          | -2.54793100 | 3.20659900  | -2.26652100 | C | -1.77082000 | 3.33871700  | -0.33670400 |
| H          | -3.56170300 | 1.97610800  | -1.50671500 | C | -2.38185800 | 4.21894200  | 0.55877300  |
| C          | -1.13209800 | 3.95481700  | -0.00109300 | C | -3.68092300 | 4.68046100  | 0.33212000  |
| H          | -1.81266000 | 4.76276100  | 0.29046000  | H | -5.38514300 | 4.59478900  | -0.98944000 |
| H          | -0.39810200 | 3.82104700  | 0.79691000  | H | -4.30722500 | 3.03059100  | -2.57482900 |
| H          | -0.60207700 | 4.27245900  | -0.90597000 | H | -0.75814100 | 3.00317300  | -0.14257600 |
| C          | -2.58443100 | 2.18628800  | 1.06858200  | H | -1.83309400 | 4.54656700  | 1.43754500  |
| H          | -3.28282600 | 2.94705100  | 1.43595600  | H | -4.15020600 | 5.36603900  | 1.03244100  |
| H          | -3.14147600 | 1.25801700  | 0.91738400  | C | -1.80855100 | 1.98593500  | -2.51212700 |
| H          | -1.82410100 | 2.01374800  | 1.83646400  | H | -2.59035400 | 1.41512500  | -3.02607600 |
| O          | 0.10036300  | 1.43958200  | 0.03866300  | H | -1.31562300 | 2.61685200  | -3.26315000 |
| O          | -1.29527400 | 0.74221500  | -1.60059800 | C | -0.76649000 | 1.04851600  | -1.95142900 |
| C          | 2.72904600  | 2.58166400  | 1.34632700  | C | -0.97687100 | -0.16854000 | -1.44206000 |
| H          | 2.64620400  | 2.63681300  | 2.43382100  | H | -1.95407900 | -0.64635200 | -1.41048300 |
| H          | 3.51205700  | 3.27566700  | 1.02634200  | C | 0.62313100  | 1.57465600  | -1.82928700 |
| H          | 1.77686700  | 2.91459100  | 0.91550300  | N | 1.44326700  | 0.60369600  | -1.30650300 |
| C          | 3.18290900  | -2.56684600 | 1.09310900  | O | 0.96212200  | 2.72068900  | -2.13129000 |
| H          | 4.12650200  | -2.79939500 | 1.60284300  | C | 2.56291300  | 2.08252400  | 0.14059400  |
| H          | 2.36247700  | -2.82752500 | 1.76567700  | C | 3.86376600  | 2.87260200  | 0.28628900  |
| H          | 3.10428600  | -3.20345800 | 0.20937800  | C | 5.10063200  | 2.07605300  | -0.16246400 |
| <b>9-N</b> |             |             |             | H | 5.99813600  | 2.68733100  | -0.01817400 |
| C          | 0.37867400  | -3.47088600 | -0.73529900 | H | 5.21387400  | 1.16138100  | 0.42559100  |
| C          | 0.05932000  | -2.97106400 | -2.03412000 | H | 5.03659100  | 1.80087000  | -1.21739800 |
| C          | 1.23401300  | -2.31514700 | -2.54593300 | C | 4.00641900  | 3.31163900  | 1.75307900  |
| C          | 2.32153500  | -2.54569000 | -1.60373000 | H | 4.86734800  | 3.98050700  | 1.85858000  |
| C          | 1.79804300  | -3.25078000 | -0.49910600 | H | 3.10784100  | 3.83640400  | 2.08441000  |
| Rh         | 0.62125500  | -1.19656200 | -0.73746400 | H | 4.15523000  | 2.44901500  | 2.40898400  |
| C          | 1.39929900  | -1.64353200 | -3.87469500 | C | 3.67437600  | 4.10902800  | -0.62782400 |
| C          | -1.26017800 | -3.09944600 | -2.73218700 | H | 4.57747100  | 4.72910500  | -0.59899700 |
| H          | -1.29625900 | -4.02277100 | -3.32270300 | H | 3.47524300  | 3.80382600  | -1.65803200 |
| H          | -2.08659700 | -3.12814100 | -2.01665100 | H | 2.82354000  | 4.70790300  | -0.29207700 |
| H          | -1.43584100 | -2.25791400 | -3.40586000 | O | 1.54460300  | 2.31545700  | 0.74538700  |
| C          | -0.52421600 | -4.23866200 | 0.18336000  | O | 2.67566000  | 1.11843100  | -0.83733000 |
| C          | 2.52043600  | -3.74981200 | 0.71610700  | H | 1.97032400  | -0.71858200 | -3.75675300 |
| H          | 2.03217400  | -3.40669700 | 1.63302800  | H | 1.93078600  | -2.29181300 | -4.58238200 |
| H          | 2.52633600  | -4.84650800 | 0.73221000  | H | 0.43335100  | -1.38135200 | -4.31059900 |
| H          | 3.55455200  | -3.40422300 | 0.74741300  | H | -1.57361000 | -3.99605400 | 0.00366300  |
| C          | 3.72551800  | -2.06504000 | -1.82288700 | H | -0.39506500 | -5.32043800 | 0.04905000  |
| H          | 4.37868600  | -2.33341900 | -0.98943300 | H | -0.30959700 | -3.99949300 | 1.22780300  |
| H          | 4.14617800  | -2.50537300 | -2.73450800 | C | -0.45478900 | -0.88456900 | 1.21965600  |
| H          | 3.74718300  | -0.97652600 | -1.93380800 | C | 0.77876500  | -0.69170300 | 1.37017900  |

|               |             |             |             |   |             |             |             |
|---------------|-------------|-------------|-------------|---|-------------|-------------|-------------|
| C             | 1.92248000  | -0.41480800 | 2.20226500  | H | 1.74060500  | -2.86315300 | 3.16112200  |
| C             | 3.23768100  | -0.61135400 | 1.75010400  | H | 0.06135600  | -3.19552000 | 3.58507200  |
| C             | 1.71916600  | 0.01886800  | 3.52721000  | C | 2.94036400  | -3.23227100 | 0.50184700  |
| C             | 4.31777600  | -0.41106600 | 2.60755900  | C | 1.31677500  | -3.51022900 | -2.19161900 |
| H             | 3.39876000  | -0.90149400 | 0.72021300  | H | 1.94615400  | -2.62342000 | -2.31305500 |
| C             | 2.80256700  | 0.22616100  | 4.37606700  | H | 1.94688800  | -4.39504100 | -2.34663400 |
| H             | 0.70565700  | 0.19416400  | 3.87342100  | H | 0.56003400  | -3.49461800 | -2.97911600 |
| C             | 4.10727400  | 0.00507400  | 3.92423500  | C | -1.82728700 | -3.86548100 | -1.42682700 |
| H             | 5.32837700  | -0.57320700 | 2.24346100  | H | -1.51290000 | -3.83989400 | -2.47276600 |
| H             | 2.62906200  | 0.56386200  | 5.39386300  | H | -2.33816400 | -4.82055400 | -1.25352300 |
| H             | 4.95078900  | 0.16537900  | 4.58915200  | H | -2.55581100 | -3.06439200 | -1.27615500 |
| N             | -1.71338200 | -1.27454600 | 1.50990000  | C | 1.40798400  | 4.66668900  | 1.41247800  |
| N             | -2.64326300 | -0.48518900 | 1.10748400  | C | 1.24114200  | 3.44887700  | 2.07227900  |
| N             | -3.87079800 | -0.85794400 | 1.38261500  | C | -0.01979800 | 3.04895000  | 2.53718800  |
| C             | -4.91731500 | 0.03956700  | 0.83640900  | C | -1.11632300 | 3.89263200  | 2.31686300  |
| H             | -5.86472500 | -0.40887200 | 1.14771200  | C | -0.95120800 | 5.11622000  | 1.66242600  |
| C             | -4.79776400 | 1.43865700  | 1.44649700  | C | 0.31016200  | 5.50797400  | 1.20795900  |
| H             | -3.84356200 | 1.89189600  | 1.17101200  | H | 2.39303900  | 4.95923000  | 1.05856300  |
| H             | -4.86784400 | 1.39470200  | 2.53775200  | H | 2.09406400  | 2.79177500  | 2.22300500  |
| C             | -4.86771400 | 0.06955500  | -0.69530400 | H | -2.10189600 | 3.56344100  | 2.63027100  |
| H             | -3.93718900 | 0.53168100  | -1.02796500 | H | -1.81209500 | 5.75957800  | 1.50132700  |
| H             | -4.93853900 | -0.93945700 | -1.11392100 | H | 0.43789500  | 6.45804900  | 0.69668500  |
| C             | -4.20899500 | -2.12909200 | 2.06004300  | C | -0.20054700 | 1.69243600  | 3.19421900  |
| H             | -3.24956900 | -2.52398200 | 2.39700600  | H | 0.66791900  | 1.46128300  | 3.82073900  |
| C             | -5.09473100 | -1.88524000 | 3.28679800  | H | -1.08668300 | 1.71349300  | 3.83757700  |
| H             | -4.62527100 | -1.17082300 | 3.96863000  | C | -0.36929400 | 0.60561200  | 2.15577700  |
| H             | -5.24148600 | -2.82765200 | 3.82384000  | C | 0.52580500  | -0.34678500 | 1.83652500  |
| H             | -6.08436900 | -1.50401300 | 3.01516200  | H | 1.48260900  | -0.41644800 | 2.35976500  |
| C             | -4.82456900 | -3.11849200 | 1.06219500  | C | -1.66901000 | 0.54489100  | 1.44162900  |
| H             | -4.14500200 | -3.29118200 | 0.22204300  | N | -1.55429700 | -0.24595900 | 0.29031100  |
| H             | -5.01516300 | -4.07771300 | 1.55399100  | O | -2.70929200 | 1.07626000  | 1.82684700  |
| H             | -5.77623200 | -2.75029100 | 0.66489900  | C | -3.73430900 | 0.13778200  | -0.60507200 |
| H             | -5.69711500 | 0.66779900  | -1.08390600 | C | -5.15376300 | -0.43280900 | -0.49649000 |
| H             | -5.59506700 | 2.08401400  | 1.06870200  | C | -5.22173900 | -1.86966700 | -1.04993200 |
| <b>TS10-N</b> |             |             |             | H | -6.25605500 | -2.22849900 | -1.01225900 |
| C             | 1.44655700  | -3.34603500 | 0.40784700  | H | -4.88759400 | -1.91405000 | -2.09230600 |
| C             | 0.52587300  | -3.50662200 | 1.50548700  | H | -4.60479700 | -2.55271900 | -0.46245000 |
| C             | -0.78454300 | -3.64510900 | 0.95471100  | C | -6.09946500 | 0.48425000  | -1.28645600 |
| C             | -0.66359200 | -3.69730900 | -0.49587100 | H | -7.12956800 | 0.12433800  | -1.19406600 |
| C             | 0.69705500  | -3.53431800 | -0.82605100 | H | -6.04770600 | 1.50914100  | -0.91250900 |
| Rh            | 0.05943500  | -1.62294900 | 0.36597000  | H | -5.83264400 | 0.50548100  | -2.34752900 |
| C             | -2.07693700 | -3.80718100 | 1.69780800  | C | -5.53256500 | -0.43016600 | 1.00224300  |
| C             | 0.89369600  | -3.52396000 | 2.95871500  | H | -6.56258200 | -0.78513500 | 1.12165000  |
| H             | 1.17809600  | -4.53585900 | 3.27395700  | H | -4.86435600 | -1.07989000 | 1.57219200  |

|   |             |             |             |             |             |             |             |
|---|-------------|-------------|-------------|-------------|-------------|-------------|-------------|
| H | -5.44949100 | 0.57448400  | 1.42352900  | H           | 5.23959100  | 3.30687100  | 0.70624700  |
| O | -3.45307300 | 1.22089500  | -1.05120100 | <b>II-N</b> |             |             |             |
| O | -2.82627000 | -0.76462000 | -0.10672800 | C           | 2.07626200  | -3.29202600 | -0.66909300 |
| H | -2.86066700 | -3.20134900 | 1.23451900  | C           | 3.01123500  | -2.65437700 | -1.58462000 |
| H | -2.41053900 | -4.85325500 | 1.69526100  | C           | 3.83322000  | -1.79180000 | -0.82778600 |
| H | -1.98325900 | -3.48647000 | 2.73786800  | C           | 3.49420800  | -1.96248500 | 0.58292200  |
| H | 3.23966900  | -2.69038400 | 1.40338400  | C           | 2.46454200  | -2.91795200 | 0.68517200  |
| H | 3.42354000  | -4.21836200 | 0.52589600  | Rh          | 1.57085700  | -1.19693400 | -0.56414600 |
| H | 3.33757000  | -2.68186700 | -0.35464300 | C           | 4.91656200  | -0.88512300 | -1.33221000 |
| C | 0.85580600  | -0.18385300 | -0.86154200 | C           | 3.05369200  | -2.87989100 | -3.06624500 |
| C | -0.05087800 | 0.65291600  | -1.21527400 | H           | 3.62982400  | -3.78313000 | -3.30363900 |
| C | -0.73649300 | 1.70884300  | -1.84129900 | H           | 2.04934700  | -3.01305700 | -3.47764700 |
| C | -1.25000400 | 1.55414800  | -3.14871200 | H           | 3.51614000  | -2.03915600 | -3.58850100 |
| C | -0.87507100 | 2.94635300  | -1.17564100 | C           | 1.09282900  | -4.37297800 | -1.00893600 |
| C | -1.88229600 | 2.61935200  | -3.77430800 | C           | 1.81480500  | -3.45157100 | 1.92758100  |
| H | -1.14595200 | 0.59452200  | -3.64462200 | H           | 0.72500800  | -3.41069800 | 1.84218000  |
| C | -1.50990600 | 4.00468500  | -1.81067200 | H           | 2.10641300  | -4.49532000 | 2.09992900  |
| H | -0.48723600 | 3.05283900  | -0.17112700 | H           | 2.10061000  | -2.87405500 | 2.80984700  |
| C | -2.01547000 | 3.84178600  | -3.10426100 | C           | 4.17281700  | -1.22081600 | 1.69444700  |
| H | -2.27923600 | 2.50374900  | -4.77836200 | H           | 3.64479000  | -1.34291900 | 2.64265800  |
| H | -1.61472600 | 4.95152700  | -1.29125600 | H           | 5.20388800  | -1.56937700 | 1.83275400  |
| H | -2.51839300 | 4.67061700  | -3.59501700 | H           | 4.21305000  | -0.15021400 | 1.47352300  |
| N | 2.21280500  | -0.23981200 | -1.24917000 | C           | -3.91504200 | 1.78895900  | -2.39926100 |
| N | 2.95815600  | 0.35466000  | -0.41830500 | C           | -2.72890600 | 1.21074400  | -2.84558100 |
| N | 4.27156300  | 0.29302000  | -0.63020300 | C           | -1.61665500 | 2.00382400  | -3.16042400 |
| C | 5.03835000  | 1.18726000  | 0.25963800  | C           | -1.71357900 | 3.39092100  | -3.00344800 |
| H | 6.08516200  | 1.06358100  | -0.03222600 | C           | -2.90113400 | 3.97497100  | -2.55212300 |
| C | 4.64308400  | 2.65788400  | 0.05669500  | C           | -4.00515000 | 3.17634900  | -2.25149500 |
| H | 3.58589400  | 2.79778700  | 0.29723800  | H           | -4.76488000 | 1.15798900  | -2.15640900 |
| H | 4.80115200  | 2.96864400  | -0.98002800 | H           | -2.64964400 | 0.13072400  | -2.93714600 |
| C | 4.88191300  | 0.74675500  | 1.72048600  | H           | -0.84768400 | 4.01154300  | -3.21565400 |
| H | 3.83450300  | 0.82532300  | 2.02465200  | H           | -2.95849100 | 5.05305000  | -2.43056600 |
| H | 5.19799600  | -0.29323800 | 1.84692500  | H           | -4.92731600 | 3.62833100  | -1.89752800 |
| C | 4.86023400  | -0.33448400 | -1.82741700 | C           | -0.31344000 | 1.34894800  | -3.58370900 |
| H | 4.06584300  | -0.97516500 | -2.21626500 | H           | -0.50404700 | 0.58827000  | -4.34860400 |
| C | 5.20237600  | 0.71094600  | -2.89749200 | H           | 0.35326400  | 2.10087400  | -4.01982500 |
| H | 4.31934600  | 1.30548800  | -3.14767100 | C           | 0.36996600  | 0.69235200  | -2.40316200 |
| H | 5.55752000  | 0.22015200  | -3.80968200 | C           | 0.56818500  | -0.62753200 | -2.20205000 |
| H | 5.99161400  | 1.38817600  | -2.55292700 | H           | 0.22639600  | -1.34140200 | -2.95533700 |
| C | 6.05495300  | -1.21960500 | -1.45664000 | C           | 0.95880100  | 1.60228500  | -1.39587700 |
| H | 5.77574300  | -1.94359800 | -0.68581300 | N           | 1.04393400  | 0.94754300  | -0.07827500 |
| H | 6.39396800  | -1.76886400 | -2.34073300 | O           | 1.43631900  | 2.69530900  | -1.60224300 |
| H | 6.90553300  | -0.63581300 | -1.08936800 | C           | 1.79744900  | 2.84009500  | 1.22745600  |
| H | 5.48617600  | 1.37890500  | 2.37875300  | C           | 3.03246700  | 3.33385100  | 1.98841400  |

|   |             |             |             |            |             |             |             |
|---|-------------|-------------|-------------|------------|-------------|-------------|-------------|
| C | 3.20633700  | 2.46885200  | 3.25654000  | C          | -3.15539700 | -3.27243800 | 1.81655000  |
| H | 4.07310500  | 2.82066700  | 3.82617600  | H          | -2.09739200 | -3.54342600 | 1.82334500  |
| H | 2.32440700  | 2.53990600  | 3.90166500  | C          | -3.49118000 | -2.59532000 | 3.15311700  |
| H | 3.36123100  | 1.41756500  | 3.00366000  | H          | -2.89039000 | -1.69124400 | 3.28097900  |
| C | 2.79250200  | 4.80037600  | 2.37787700  | H          | -3.28768700 | -3.27395400 | 3.98822200  |
| H | 3.65205300  | 5.17774100  | 2.94136800  | H          | -4.54917600 | -2.31460100 | 3.19594200  |
| H | 2.65501100  | 5.42340500  | 1.49006400  | C          | -3.97612600 | -4.54091700 | 1.56741400  |
| H | 1.89551600  | 4.90040600  | 2.99397800  | H          | -3.73021000 | -4.98072700 | 0.59646800  |
| C | 4.27612900  | 3.21895900  | 1.08199300  | H          | -3.75377100 | -5.27758600 | 2.34603000  |
| H | 5.14830000  | 3.63134900  | 1.60037200  | H          | -5.05429200 | -4.35234000 | 1.59732700  |
| H | 4.48639200  | 2.17861900  | 0.82331400  | H          | -5.72854400 | -1.60593700 | -1.58721700 |
| H | 4.13242400  | 3.77522400  | 0.15065700  | H          | -5.80614400 | 0.00107700  | 0.42714100  |
| O | 0.77257200  | 3.44404300  | 1.06749600  | <b>11s</b> |             |             |             |
| O | 2.03538100  | 1.55631900  | 0.77068400  | C          | 1.54584600  | -0.42093800 | -3.01387400 |
| H | 4.89062800  | 0.08205500  | -0.82047000 | C          | 1.18535000  | 0.97444800  | -2.94844900 |
| H | 5.91132100  | -1.31836900 | -1.16491100 | C          | 2.39849200  | 1.74093600  | -2.64652300 |
| H | 4.81079500  | -0.69340400 | -2.40244900 | C          | 3.43600000  | 0.83229800  | -2.40306800 |
| H | 0.73642800  | -4.27520100 | -2.03768300 | C          | 2.89689400  | -0.52231300 | -2.58275700 |
| H | 1.54094600  | -5.37013000 | -0.90285500 | Rh         | 1.68883300  | 0.36318000  | -0.91648500 |
| H | 0.22136200  | -4.31883300 | -0.35080000 | C          | 2.43540700  | 3.23371900  | -2.55666000 |
| C | -0.15600700 | -0.89881900 | 0.40920000  | C          | -0.08606900 | 1.55726900  | -3.47877500 |
| C | -0.16907700 | 0.43864700  | 0.59456900  | H          | -0.00420700 | 1.70931500  | -4.56370200 |
| C | -1.20553800 | 1.26284900  | 1.24916700  | H          | -0.93314500 | 0.89373100  | -3.29468200 |
| C | -1.61596700 | 0.92002200  | 2.54751000  | H          | -0.30531700 | 2.52283000  | -3.02051500 |
| C | -1.85994800 | 2.31396200  | 0.59029000  | C          | 0.63091600  | -1.51871100 | -3.46341100 |
| C | -2.66301800 | 1.60060700  | 3.16950500  | C          | 3.74024300  | -1.75611200 | -2.48759400 |
| H | -1.10819000 | 0.10772600  | 3.05968000  | H          | 3.15117700  | -2.66596000 | -2.61439900 |
| C | -2.90030700 | 2.99747300  | 1.21478000  | H          | 4.50987100  | -1.74213500 | -3.26958300 |
| H | -1.55684000 | 2.59756800  | -0.40952700 | H          | 4.25548000  | -1.81398400 | -1.52402200 |
| C | -3.31001300 | 2.64365500  | 2.50342300  | C          | 4.84836400  | 1.11598000  | -1.99353800 |
| H | -2.96631300 | 1.32171800  | 4.17528300  | H          | 5.14714400  | 0.47932200  | -1.15421000 |
| H | -3.39710800 | 3.80284500  | 0.68245100  | H          | 5.54416700  | 0.91526000  | -2.81795500 |
| H | -4.12450400 | 3.17819400  | 2.98450400  | H          | 4.97895700  | 2.15719200  | -1.68918800 |
| N | -1.12627200 | -1.80252400 | 0.81244900  | C          | -5.48036600 | 4.11423300  | -0.60762700 |
| N | -2.26833000 | -1.54971300 | 0.31252100  | C          | -4.15639100 | 3.98697900  | -1.04218100 |
| N | -3.28177700 | -2.31722800 | 0.69879800  | C          | -3.11595300 | 3.81520200  | -0.12232700 |
| C | -4.59365700 | -1.79032700 | 0.25782500  | C          | -3.42274300 | 3.76794400  | 1.24690600  |
| H | -5.33972700 | -2.41319200 | 0.75877400  | C          | -4.74102700 | 3.89718700  | 1.68175700  |
| C | -4.79724900 | -0.33206700 | 0.69375300  | C          | -5.77630600 | 4.07110400  | 0.75539200  |
| H | -4.07219300 | 0.32257200  | 0.20544400  | H          | -6.27702600 | 4.24482500  | -1.33552700 |
| H | -4.66886900 | -0.21837500 | 1.77272800  | H          | -3.93124500 | 4.02094700  | -2.10573900 |
| C | -4.74796700 | -1.96395900 | -1.25701900 | H          | -2.61007500 | 3.61646900  | 1.95313100  |
| H | -3.97566700 | -1.38781300 | -1.77296000 | H          | -4.96465100 | 3.86014600  | 2.74494100  |
| H | -4.64511600 | -3.01462300 | -1.54490900 | H          | -6.80383100 | 4.16878800  | 1.09536400  |

|   |             |             |             |               |             |             |             |
|---|-------------|-------------|-------------|---------------|-------------|-------------|-------------|
| C | -1.67634800 | 3.66499200  | -0.58020700 | N             | -2.30577500 | -0.98908300 | 0.16037500  |
| H | -1.62788900 | 3.78810400  | -1.66811200 | N             | -2.31318500 | -2.14718500 | -0.36138700 |
| H | -1.07543200 | 4.46774600  | -0.14118400 | N             | -3.26155300 | -2.98504400 | 0.03542800  |
| C | -1.05380200 | 2.32847100  | -0.19550000 | C             | -3.16345800 | -4.33298100 | -0.56162100 |
| C | -1.58878500 | 1.16013500  | -0.60187500 | H             | -3.95948700 | -4.91548500 | -0.09123400 |
| H | -2.51085000 | 1.21632300  | -1.18314900 | C             | -3.43106100 | -4.27778900 | -2.06918400 |
| C | 0.01629500  | 2.40093000  | 0.85773500  | H             | -2.67068200 | -3.66942100 | -2.56891800 |
| N | 1.16460400  | 1.76882000  | 0.52392200  | H             | -4.41298100 | -3.84048300 | -2.27672500 |
| O | -0.20214400 | 3.03069900  | 1.90371300  | C             | -1.81885500 | -4.99453000 | -0.23685500 |
| C | 2.78951400  | 0.62305700  | 1.75627700  | H             | -0.99904400 | -4.45595400 | -0.71789300 |
| C | 3.54899000  | 0.47295700  | 3.06915800  | H             | -1.63216700 | -4.99700800 | 0.84063600  |
| C | 4.35017500  | 1.76190500  | 3.34444800  | C             | -4.17641500 | -2.69947600 | 1.16127300  |
| H | 4.90583500  | 1.65020600  | 4.28108600  | H             | -4.02816000 | -1.63964100 | 1.37227800  |
| H | 5.07092700  | 1.95797600  | 2.54296700  | C             | -5.63720800 | -2.91525800 | 0.75554600  |
| H | 3.69166300  | 2.62942300  | 3.43661800  | H             | -5.89215200 | -2.31117400 | -0.12068200 |
| C | 4.48865500  | -0.73726100 | 2.97312300  | H             | -6.29586200 | -2.61857900 | 1.57876200  |
| H | 5.02266000  | -0.85635800 | 3.92105300  | H             | -5.85004800 | -3.96520500 | 0.52622800  |
| H | 3.93105900  | -1.65595600 | 2.77142000  | C             | -3.77968900 | -3.50694400 | 2.40386200  |
| H | 5.22802100  | -0.60663300 | 2.17690000  | H             | -2.73370000 | -3.32114500 | 2.66551300  |
| C | 2.49878100  | 0.24601700  | 4.18076100  | H             | -4.40589500 | -3.21582600 | 3.25418600  |
| H | 3.00849500  | 0.11545000  | 5.14082600  | H             | -3.91141500 | -4.58295400 | 2.24501600  |
| H | 1.81721100  | 1.09720800  | 4.25989800  | H             | -1.81153100 | -6.03034100 | -0.59335000 |
| H | 1.90674400  | -0.65329400 | 3.98036100  | H             | -3.40270500 | -5.28461600 | -2.49915200 |
| O | 2.87498500  | -0.19404300 | 0.82755100  | <b>TS12bs</b> |             |             |             |
| O | 2.01776200  | 1.68906600  | 1.71682800  | C             | 1.43487800  | -1.10711400 | -2.76700200 |
| H | 3.36289300  | 3.59028300  | -2.10327000 | C             | 1.16834600  | 0.28310800  | -3.03490500 |
| H | 2.34820300  | 3.68141600  | -3.55421600 | C             | 2.43026500  | 1.02387800  | -2.93342800 |
| H | 1.60004300  | 3.60758500  | -1.95604200 | C             | 3.40582300  | 0.13825100  | -2.47084100 |
| H | -0.31007800 | -1.50261400 | -2.90543500 | C             | 2.77654100  | -1.18578400 | -2.30449000 |
| H | 0.39442700  | -1.39876400 | -4.52775100 | Rh            | 1.66074800  | 0.08425500  | -0.89468500 |
| H | 1.08461500  | -2.50285800 | -3.32958700 | C             | 2.55617600  | 2.48701200  | -3.22147700 |
| C | -1.17356900 | -0.20778400 | -0.23483800 | C             | -0.07633300 | 0.82511300  | -3.66164700 |
| C | 0.09906200  | -0.68480400 | -0.18136000 | H             | 0.00791400  | 0.77960600  | -4.75590500 |
| C | 0.45776800  | -1.92241600 | 0.54337900  | H             | -0.95605600 | 0.24970300  | -3.36764300 |
| C | 1.26803900  | -2.92393300 | -0.01955400 | H             | -0.24463900 | 1.86676400  | -3.38130700 |
| C | 0.07488900  | -2.07255700 | 1.89322400  | C             | 0.44447100  | -2.22045100 | -2.91055900 |
| C | 1.67053700  | -4.03339600 | 0.72440800  | C             | 3.52078400  | -2.42086400 | -1.89752000 |
| H | 1.58029600  | -2.82502500 | -1.05175700 | H             | 2.83952200  | -3.21234400 | -1.57544800 |
| C | 0.48001900  | -3.17824200 | 2.64048800  | H             | 4.11321600  | -2.80871100 | -2.73674300 |
| H | -0.54700500 | -1.30760700 | 2.34852100  | H             | 4.21408000  | -2.21388200 | -1.07723200 |
| C | 1.28214800  | -4.16777300 | 2.06042600  | C             | 4.83739200  | 0.42040100  | -2.13525400 |
| H | 2.28970200  | -4.79598800 | 0.25851400  | H             | 5.08720100  | 0.03559200  | -1.14095700 |
| H | 0.17353300  | -3.26446700 | 3.67998900  | H             | 5.51090100  | -0.06878000 | -2.85016400 |
| H | 1.60021300  | -5.02829500 | 2.64238900  | H             | 5.05298200  | 1.49144400  | -2.14542400 |

|   |             |             |             |             |             |             |             |
|---|-------------|-------------|-------------|-------------|-------------|-------------|-------------|
| C | -5.36936200 | 4.34517100  | -0.16159500 | C           | 0.12821900  | -1.21760400 | 1.42225700  |
| C | -4.27537400 | 3.96181900  | -0.94487500 | C           | 1.08954800  | -2.23807100 | 1.52640900  |
| C | -2.96993600 | 4.04304300  | -0.44439400 | C           | -0.69102600 | -0.95523400 | 2.53729600  |
| C | -2.77985500 | 4.51816800  | 0.86415000  | C           | 1.20888000  | -2.99168700 | 2.69285900  |
| C | -3.86904000 | 4.90184700  | 1.64615900  | H           | 1.73641400  | -2.43793600 | 0.67914800  |
| C | -5.16998500 | 4.81686800  | 1.13673500  | C           | -0.56979500 | -1.70494200 | 3.70608100  |
| H | -6.37521600 | 4.27407100  | -0.56774300 | H           | -1.42850100 | -0.16080000 | 2.47139300  |
| H | -4.43840500 | 3.59555400  | -1.95600400 | C           | 0.38004000  | -2.72847800 | 3.78874600  |
| H | -1.76672300 | 4.57236300  | 1.25311100  | H           | 1.94807500  | -3.78632700 | 2.74707200  |
| H | -3.70471200 | 5.26825900  | 2.65648200  | H           | -1.21137600 | -1.48662600 | 4.55538600  |
| H | -6.01798800 | 5.11521600  | 1.74733600  | H           | 0.47770600  | -3.31115800 | 4.70048400  |
| C | -1.77918600 | 3.59470800  | -1.27462700 | N           | -2.35616700 | -1.08479200 | -0.25558300 |
| H | -2.10791500 | 3.40214900  | -2.30200600 | N           | -1.94415300 | -2.29206800 | -0.21962500 |
| H | -1.04025600 | 4.40114200  | -1.31117100 | N           | -2.87143700 | -3.21286600 | 0.05447100  |
| C | -1.10497300 | 2.35221900  | -0.71302700 | C           | -2.44063700 | -4.59809400 | -0.21463900 |
| C | -1.71670100 | 1.11898200  | -0.85659000 | H           | -3.25224900 | -5.23235700 | 0.14626300  |
| H | -2.69494100 | 1.11719600  | -1.33599900 | C           | -2.25322200 | -4.85848100 | -1.71592900 |
| C | 0.04676700  | 2.57887100  | 0.13141900  | H           | -1.44784600 | -4.23382900 | -2.11360300 |
| N | 0.73465500  | 1.39077400  | 0.44264400  | H           | -3.16681200 | -4.63763500 | -2.27574200 |
| O | 0.39886600  | 3.68260300  | 0.58960500  | C           | -1.17745800 | -4.94026800 | 0.58332500  |
| C | 2.55984700  | 0.79397600  | 1.78141800  | H           | -0.32186000 | -4.35904500 | 0.23250500  |
| C | 3.30090500  | 0.97715600  | 3.09831200  | H           | -1.31862700 | -4.72277800 | 1.64616300  |
| C | 3.85671000  | 2.41866600  | 3.13021300  | C           | -4.27948500 | -2.83503200 | 0.28898200  |
| H | 4.41028300  | 2.57165400  | 4.06211600  | H           | -4.21127800 | -1.85549800 | 0.77156600  |
| H | 4.54181800  | 2.59609400  | 2.29387000  | C           | -5.04978000 | -2.65953500 | -1.02664300 |
| H | 3.05103700  | 3.15592800  | 3.07872900  | H           | -4.51729600 | -1.97552100 | -1.69304100 |
| C | 4.44387000  | -0.04428700 | 3.17811200  | H           | -6.04447600 | -2.24320900 | -0.83100100 |
| H | 4.97616500  | 0.08465400  | 4.12554500  | H           | -5.17976300 | -3.61902900 | -1.53875700 |
| H | 4.06090800  | -1.06801200 | 3.13317200  | C           | -4.98171700 | -3.79587400 | 1.25057400  |
| H | 5.15862500  | 0.08935200  | 2.36107000  | H           | -4.38034200 | -3.96583900 | 2.14932100  |
| C | 2.30981800  | 0.75943600  | 4.26183800  | H           | -5.93539500 | -3.35500200 | 1.55871500  |
| H | 2.84024500  | 0.88362200  | 5.21141100  | H           | -5.20549900 | -4.76438500 | 0.79143600  |
| H | 1.48978600  | 1.48088500  | 4.22788800  | H           | -0.94274800 | -6.00427700 | 0.47222800  |
| H | 1.88462000  | -0.24801700 | 4.23472100  | H           | -1.99095000 | -5.90788600 | -1.89040400 |
| O | 2.89934000  | -0.00837100 | 0.90220100  |             |             |             |             |
| O | 1.51311800  | 1.59319500  | 1.65740300  | <b>13bs</b> |             |             |             |
| H | 3.53498400  | 2.87591600  | -2.93162600 | C           | -2.29556800 | -1.09194800 | -2.28901400 |
| H | 2.41391500  | 2.68669800  | -4.29101900 | C           | -1.05205200 | -0.71774600 | -2.90428000 |
| H | 1.79159800  | 3.05770600  | -2.68278900 | C           | -0.27544500 | -1.93639200 | -3.16542100 |
| H | -0.53952700 | -1.91865500 | -2.54322800 | C           | -0.96392700 | -3.01695900 | -2.59936400 |
| H | 0.33777900  | -2.50831200 | -3.96438800 | C           | -2.18755000 | -2.48051600 | -1.98358200 |
| H | 0.75398200  | -3.10554500 | -2.35023000 | Rh          | -0.57037300 | -1.48612300 | -0.89656500 |
| C | -1.31635600 | -0.13109900 | -0.33212000 | C           | 1.05267300  | -1.93579900 | -3.85299300 |
| C | -0.02187200 | -0.38885600 | 0.19938600  | C           | -0.73072500 | 0.62530100  | -3.47783700 |
|   |             |             |             | H           | -1.10627600 | 0.69186800  | -4.50765200 |



|   |             |             |             |   |             |             |             |
|---|-------------|-------------|-------------|---|-------------|-------------|-------------|
| H | -1.18653300 | 1.42944900  | -2.89683800 | H | 0.47555900  | -1.94156100 | 4.20481500  |
| H | 0.34709800  | 0.79915400  | -3.50205700 | O | -0.36116100 | -2.82827400 | 0.83563700  |
| C | -3.47582800 | -0.20188700 | -2.04931500 | O | 1.44101800  | -1.56159200 | 1.29958100  |
| C | -3.22232200 | -3.32591200 | -1.30676200 | H | 1.55105300  | -2.90475000 | -3.77602600 |
| H | -3.86017700 | -2.72985200 | -0.64944400 | H | 0.94075100  | -1.69151800 | -4.91686100 |
| H | -3.86623300 | -3.81109600 | -2.05208300 | H | 1.71322300  | -1.17829200 | -3.41548700 |
| H | -2.75915900 | -4.11620300 | -0.70933300 | H | -3.17321500 | 0.82732000  | -1.84889600 |
| C | -0.56458500 | -4.46019700 | -2.55843100 | H | -4.13271400 | -0.19423600 | -2.93038200 |
| H | -0.65425900 | -4.86276200 | -1.54420400 | H | -4.06979000 | -0.54386300 | -1.19897200 |
| H | -1.20845800 | -5.06813800 | -3.20702900 | C | 0.13072700  | 1.42331000  | -0.34467500 |
| H | 0.46960100  | -4.60020900 | -2.88291600 | C | -0.02656700 | 0.15128800  | 0.37318800  |
| C | 5.73407100  | 4.03120000  | -0.35894000 | C | -0.52458400 | 0.21386500  | 1.79871400  |
| C | 4.84551800  | 3.34977800  | -1.19714700 | C | -1.66217300 | -0.47345500 | 2.23632900  |
| C | 4.63188400  | 1.97344300  | -1.05142700 | C | 0.19870100  | 0.98354100  | 2.72148100  |
| C | 5.32945100  | 1.28913100  | -0.04167600 | C | -2.06615300 | -0.40301200 | 3.57097200  |
| C | 6.21725100  | 1.96597800  | 0.79468700  | H | -2.23238000 | -1.05515900 | 1.52036700  |
| C | 6.42396800  | 3.34136900  | 0.63954500  | C | -0.20227200 | 1.05567200  | 4.05659400  |
| H | 5.88643700  | 5.09977500  | -0.48813900 | H | 1.07890200  | 1.52516700  | 2.38616200  |
| H | 4.31166300  | 3.89340900  | -1.97341800 | C | -1.33472700 | 0.35867200  | 4.48694300  |
| H | 5.15630300  | 0.22350100  | 0.08114300  | H | -2.95658700 | -0.93644700 | 3.89190700  |
| H | 6.75070300  | 1.42075000  | 1.56937800  | H | 0.37016300  | 1.65439100  | 4.75967400  |
| H | 7.11628500  | 3.86796400  | 1.29097800  | H | -1.64859200 | 0.41442100  | 5.52553100  |
| C | 3.63867400  | 1.23045500  | -1.93054200 | N | -0.86222500 | 2.40063300  | -0.40216800 |
| H | 3.36511700  | 1.86353400  | -2.78238600 | N | -1.96050600 | 2.11199400  | 0.16973500  |
| H | 4.11866300  | 0.33139500  | -2.33268300 | N | -2.94657400 | 3.03154200  | 0.04141300  |
| C | 2.38757700  | 0.81664000  | -1.17946400 | C | -3.98727700 | 2.88655800  | 1.08070800  |
| C | 1.28680000  | 1.68641800  | -1.05435600 | H | -4.69495800 | 3.69922000  | 0.90353700  |
| H | 1.32660200  | 2.64311500  | -1.57076800 | C | -4.73824200 | 1.56054600  | 0.91370700  |
| C | 2.39415500  | -0.44117500 | -0.55439000 | H | -4.06236600 | 0.71399600  | 1.05933500  |
| N | 1.10539100  | -0.75159400 | 0.14218000  | H | -5.17794700 | 1.48627100  | -0.08541300 |
| O | 3.26310000  | -1.32259000 | -0.52541500 | C | -3.41845200 | 3.03480100  | 2.50037400  |
| C | 0.62608700  | -2.59556900 | 1.53205500  | H | -2.70122700 | 2.23711300  | 2.70923900  |
| C | 1.07852000  | -3.43279700 | 2.71672500  | H | -2.90947200 | 3.99409100  | 2.62829300  |
| C | 2.36929700  | -4.16558200 | 2.28083500  | C | -2.69026000 | 4.32285600  | -0.62763500 |
| H | 2.72938400  | -4.78191000 | 3.11056700  | H | -2.01802600 | 4.06962800  | -1.45165000 |
| H | 2.18037600  | -4.82010300 | 1.42330800  | C | -3.97212700 | 4.90604000  | -1.22717200 |
| H | 3.15292900  | -3.45449500 | 2.00660600  | H | -4.50531400 | 4.15665600  | -1.82116700 |
| C | -0.02645800 | -4.43945400 | 3.06611000  | H | -3.71531600 | 5.74357800  | -1.88441600 |
| H | 0.30300300  | -5.05818700 | 3.90620900  | H | -4.65517100 | 5.29156900  | -0.46281700 |
| H | -0.94858000 | -3.92755200 | 3.35768600  | C | -1.96255700 | 5.32847200  | 0.27668300  |
| H | -0.25169600 | -5.09759700 | 2.22259700  | H | -1.07033700 | 4.87584400  | 0.71775700  |
| C | 1.36538100  | -2.51125400 | 3.92116400  | H | -1.64978800 | 6.20299700  | -0.30537500 |
| H | 1.66667700  | -3.12672500 | 4.77454800  | H | -2.61409300 | 5.67992500  | 1.08366700  |
| H | 2.17126700  | -1.80647600 | 3.70442000  | H | -4.22411800 | 2.97617400  | 3.24082800  |

|               |             |             |             |   |             |             |             |
|---------------|-------------|-------------|-------------|---|-------------|-------------|-------------|
| H             | -5.54375400 | 1.48795000  | 1.65242500  | C | -3.88059600 | -0.86112100 | 4.20638300  |
| <b>TS12as</b> |             |             |             |   |             |             |             |
| C             | -1.49088800 | -0.01629800 | -2.71677300 | H | -4.77677400 | -0.60584700 | 4.78409400  |
| C             | -0.74300800 | -1.25774600 | -2.77326300 | H | -3.72357300 | -1.94165300 | 4.27424200  |
| C             | -1.67672300 | -2.35817900 | -2.58730500 | H | -3.01942500 | -0.37235300 | 4.67039000  |
| C             | -2.93598400 | -1.80434400 | -2.28237300 | C | -5.25959700 | -1.12722200 | 2.11493500  |
| C             | -2.82287500 | -0.35096100 | -2.35846600 | H | -6.16796700 | -0.91585400 | 2.69153500  |
| Rh            | -1.36471000 | -1.00308000 | -0.65599400 | H | -5.41872300 | -0.79129300 | 1.08694400  |
| C             | -1.28381300 | -3.79776900 | -2.61452300 | H | -5.11636900 | -2.21409300 | 2.10154800  |
| C             | 0.66671400  | -1.38520500 | -3.25090200 | C | -4.24546700 | 1.11062000  | 2.68312100  |
| H             | 0.68927400  | -1.39608200 | -4.34885400 | H | -5.14113600 | 1.40177100  | 3.24503700  |
| H             | 1.27500000  | -0.54343100 | -2.91233500 | H | -3.38802300 | 1.63713300  | 3.11361400  |
| H             | 1.12799300  | -2.30861700 | -2.89516700 | H | -4.35972200 | 1.44725800  | 1.65024000  |
| C             | -0.93035800 | 1.32392400  | -3.08380300 | O | -2.88011700 | -0.49710200 | 0.67126600  |
| C             | -3.97612100 | 0.57002300  | -2.12456900 | O | -1.79497000 | -1.29034700 | 2.48700700  |
| H             | -3.72514100 | 1.60687100  | -2.35798800 | H | -2.14290900 | -4.45457600 | -2.46410800 |
| H             | -4.82759300 | 0.27621200  | -2.74865200 | H | -0.81652500 | -4.05236300 | -3.57221500 |
| H             | -4.29321300 | 0.51377200  | -1.07675100 | H | -0.55487800 | -4.00509700 | -1.82136100 |
| C             | -4.19966600 | -2.50963100 | -1.90820900 | H | -0.03590900 | 1.55703200  | -2.50014400 |
| H             | -4.97313200 | -2.36309000 | -2.67195100 | H | -0.65228100 | 1.32657200  | -4.14493600 |
| H             | -4.04223400 | -3.58253500 | -1.78080400 | H | -1.65734700 | 2.12273900  | -2.92669000 |
| H             | -4.58552200 | -2.10757000 | -0.96520300 | C | 1.27641800  | 0.29096700  | -0.00655700 |
| C             | 6.55010500  | -3.08322900 | 0.32737300  | C | -0.08841000 | 0.39407000  | 0.12478000  |
| C             | 5.31735400  | -3.15209700 | -0.32998800 | C | -0.68956600 | 1.56804200  | 0.78787600  |
| C             | 4.12460200  | -3.22657700 | 0.39841300  | C | -1.75582600 | 2.29647500  | 0.23243300  |
| C             | 4.18225600  | -3.22112100 | 1.80070600  | C | -0.19302200 | 1.98520400  | 2.04166100  |
| C             | 5.41095100  | -3.15273400 | 2.45647500  | C | -2.26521100 | 3.42878800  | 0.86508400  |
| C             | 6.60029400  | -3.08463100 | 1.72212900  | H | -2.17849400 | 1.97652800  | -0.70815700 |
| H             | 7.46805700  | -3.02738700 | -0.25187000 | C | -0.71291400 | 3.10687300  | 2.68459000  |
| H             | 5.28361300  | -3.15198000 | -1.41699800 | H | 0.61528000  | 1.42453600  | 2.49966100  |
| H             | 3.25173200  | -3.26093400 | 2.36151900  | C | -1.74458000 | 3.84489600  | 2.09288600  |
| H             | 5.44213800  | -3.15071900 | 3.54293300  | H | -3.07562700 | 3.98339600  | 0.39974600  |
| H             | 7.55675500  | -3.02982300 | 2.23485700  | H | -0.31272500 | 3.40570600  | 3.64969400  |
| C             | 2.78125100  | -3.31375700 | -0.30967500 | H | -2.14481700 | 4.72408700  | 2.58984100  |
| H             | 2.93778100  | -3.31305400 | -1.39374400 | N | 2.11155100  | 1.45011500  | 0.13604100  |
| H             | 2.30004300  | -4.26399100 | -0.05486500 | N | 1.72656500  | 2.40493100  | -0.61245000 |
| C             | 1.84731800  | -2.17819300 | 0.06991000  | N | 2.34517400  | 3.56207700  | -0.48711400 |
| C             | 2.08002400  | -0.88886000 | -0.28114200 | C | 1.88954700  | 4.60543900  | -1.43028100 |
| H             | 3.04822100  | -0.67468300 | -0.73416200 | H | 2.47230200  | 5.49441500  | -1.17770100 |
| C             | 0.69134100  | -2.53443200 | 0.96492500  | C | 2.20998900  | 4.21184100  | -2.87607500 |
| N             | -0.40913800 | -2.35188000 | 0.23058100  | H | 1.65343400  | 3.31417600  | -3.16340500 |
| O             | 0.83244500  | -3.07816800 | 2.06229800  | H | 3.27849700  | 4.00849100  | -2.99899400 |
| C             | -2.77116800 | -0.78188700 | 1.94247600  | C | 0.40431600  | 4.92296700  | -1.22891800 |
| C             | -4.04942000 | -0.41458200 | 2.74809300  | H | -0.21335900 | 4.06069000  | -1.49210000 |
|               |             |             |             | H | 0.19651600  | 5.18028800  | -0.18651100 |

|             |             |             |             |   |             |             |             |
|-------------|-------------|-------------|-------------|---|-------------|-------------|-------------|
| C           | 3.36613300  | 3.83874400  | 0.54720800  | C | 2.81792600  | -3.29465500 | -0.36006300 |
| H           | 3.47274000  | 2.89681100  | 1.08705600  | H | 2.98829200  | -3.26691600 | -1.44158000 |
| C           | 4.71283000  | 4.19479100  | -0.09020700 | H | 2.34736700  | -4.25672300 | -0.13206600 |
| H           | 5.04992700  | 3.39753700  | -0.75999900 | C | 1.86366400  | -2.17991100 | 0.03339600  |
| H           | 5.46886300  | 4.32623100  | 0.69118700  | C | 2.07856500  | -0.88382500 | -0.30706400 |
| H           | 4.65988000  | 5.12835400  | -0.66087800 | H | 3.04451200  | -0.65555500 | -0.75812100 |
| C           | 2.86346000  | 4.90831300  | 1.52327400  | C | 0.70904700  | -2.56966300 | 0.91221100  |
| H           | 1.91294900  | 4.60225100  | 1.97043600  | N | -0.39337200 | -2.38057700 | 0.18257500  |
| H           | 3.59402500  | 5.04764400  | 2.32707800  | O | 0.84205500  | -3.14932700 | 1.99307000  |
| H           | 2.72114800  | 5.87686200  | 1.03204800  | C | -2.67064600 | -0.72397000 | 1.98541200  |
| H           | 0.11069000  | 5.76705600  | -1.86198800 | C | -3.93784000 | -0.41704200 | 2.83155600  |
| H           | 1.93245300  | 5.02102300  | -3.55965400 | C | -3.68502400 | -0.81197500 | 4.29259400  |
| <b>13as</b> |             |             |             | H | -4.56890800 | -0.58738200 | 4.90122800  |
| C           | -1.55887200 | -0.01968600 | -2.70940900 | H | -3.46865200 | -1.88080000 | 4.38267000  |
| C           | -0.79282600 | -1.24939600 | -2.78780500 | H | -2.83215300 | -0.26592100 | 4.70446900  |
| C           | -1.70573900 | -2.36453000 | -2.59131700 | C | -5.13076000 | -1.21147900 | 2.26805200  |
| C           | -2.96670800 | -1.83155700 | -2.25298800 | H | -6.02547000 | -1.03427500 | 2.87658000  |
| C           | -2.87780600 | -0.37689300 | -2.32403400 | H | -5.34978900 | -0.91424900 | 1.23922900  |
| Rh          | -1.37573600 | -1.02232300 | -0.65747200 | H | -4.92809700 | -2.28890600 | 2.27535000  |
| C           | -1.29332000 | -3.79787800 | -2.64044100 | C | -4.22183700 | 1.09359500  | 2.73697700  |
| C           | 0.61208400  | -1.35156400 | -3.28559000 | H | -5.11504200 | 1.34856300  | 3.31995000  |
| H           | 0.62071300  | -1.36452300 | -4.38370100 | H | -3.38241500 | 1.67665000  | 3.12784500  |
| H           | 1.20829800  | -0.49778100 | -2.95576900 | H | -4.38625800 | 1.39737400  | 1.70028800  |
| H           | 1.09514200  | -2.26520600 | -2.93344500 | O | -2.86698200 | -0.54469100 | 0.70437600  |
| C           | -1.02700800 | 1.33010000  | -3.08490400 | O | -1.62164500 | -1.09109500 | 2.50711100  |
| C           | -4.03886100 | 0.52376500  | -2.05371600 | H | -2.14099500 | -4.46852700 | -2.48617800 |
| H           | -3.80403900 | 1.56908700  | -2.26369100 | H | -0.83585700 | -4.03427800 | -3.60740500 |
| H           | -4.89542500 | 0.23450600  | -2.67304000 | H | -0.55070800 | -4.00392900 | -1.85970900 |
| H           | -4.33983100 | 0.43872600  | -1.00313200 | H | -0.14184600 | 1.59020900  | -2.49831900 |
| C           | -4.21154900 | -2.55804200 | -1.85656600 | H | -0.74110000 | 1.32823800  | -4.14385900 |
| H           | -5.00274300 | -2.41916500 | -2.60342000 | H | -1.77530200 | 2.11208300  | -2.94273300 |
| H           | -4.03535000 | -3.62899800 | -1.73836500 | C | 1.26617700  | 0.28713500  | -0.02593100 |
| H           | -4.58364300 | -2.16667900 | -0.90346900 | C | -0.09885400 | 0.38037100  | 0.11644300  |
| C           | 6.56700900  | -2.94594200 | 0.33709200  | C | -0.70260800 | 1.55547600  | 0.77546500  |
| C           | 5.34518800  | -3.02722400 | -0.33899600 | C | -1.78044700 | 2.26862300  | 0.22301100  |
| C           | 4.14994600  | -3.20128200 | 0.36795600  | C | -0.19946300 | 1.98917900  | 2.02099300  |
| C           | 4.19313200  | -3.28227400 | 1.76848300  | C | -2.29537600 | 3.40227900  | 0.84898600  |
| C           | 5.41100600  | -3.20274900 | 2.44288300  | H | -2.20638700 | 1.93736200  | -0.71195700 |
| C           | 6.60327100  | -3.03538100 | 1.72944900  | C | -0.72265600 | 3.11319100  | 2.65630400  |
| H           | 7.48723300  | -2.81250200 | -0.22561500 | H | 0.61641000  | 1.43944900  | 2.47819200  |
| H           | 5.32204600  | -2.95980000 | -1.42413400 | C | -1.76677000 | 3.83595800  | 2.06697900  |
| H           | 3.25895200  | -3.39267200 | 2.31348800  | H | -3.11506600 | 3.94451800  | 0.38530600  |
| H           | 5.43137600  | -3.26817500 | 3.52760600  | H | -0.31662700 | 3.42529400  | 3.61476300  |
| H           | 7.55126400  | -2.97184300 | 2.25669500  | H | -2.17011200 | 4.71668700  | 2.55871600  |

|               |             |             |             |   |             |             |             |
|---------------|-------------|-------------|-------------|---|-------------|-------------|-------------|
| N             | 2.09442700  | 1.45221500  | 0.10945100  | H | 0.85536700  | 0.31950600  | -2.90616900 |
| N             | 1.69489600  | 2.40907000  | -0.62857100 | C | -0.45469600 | -3.61204000 | -2.29592400 |
| N             | 2.31042200  | 3.56810200  | -0.50330100 | H | 0.61397600  | -3.39677400 | -2.26543200 |
| C             | 1.84370400  | 4.61530200  | -1.43657100 | H | -0.65952300 | -4.19704700 | -3.20058500 |
| H             | 2.43539400  | 5.50074200  | -1.19243700 | H | -0.70409400 | -4.23074300 | -1.43042900 |
| C             | 2.13768300  | 4.22387500  | -2.88862000 | C | -3.58847800 | -3.40617800 | -1.71012300 |
| H             | 1.57037400  | 3.33124900  | -3.17052900 | H | -3.05523000 | -4.35882300 | -1.70127800 |
| H             | 3.20269900  | 4.01344400  | -3.02901300 | H | -4.40348100 | -3.47300800 | -2.44043400 |
| C             | 0.36410900  | 4.93978400  | -1.20783000 | H | -4.02822300 | -3.23942700 | -0.72237400 |
| H             | -0.26220900 | 4.08008700  | -1.45854700 | C | -4.44196000 | -0.37811200 | -1.92570800 |
| H             | 0.17699700  | 5.19836700  | -0.16180300 | H | -4.96118000 | -0.96329900 | -1.16488500 |
| C             | 3.34667300  | 3.84001900  | 0.51691900  | H | -5.01191400 | -0.44182200 | -2.86131800 |
| H             | 3.45598000  | 2.89771400  | 1.05554000  | H | -4.42769200 | 0.66673200  | -1.61054800 |
| C             | 4.68623300  | 4.18896700  | -0.13918000 | C | -1.88260900 | 1.30741100  | -2.93895400 |
| H             | 5.00949800  | 3.39009100  | -0.81383800 | H | -2.73154600 | 1.86469000  | -2.53842800 |
| H             | 5.45404200  | 4.31618600  | 0.63136800  | H | -1.94333900 | 1.35251300  | -4.03420900 |
| H             | 4.62995100  | 5.12288100  | -0.70895100 | H | -0.96041100 | 1.80736900  | -2.63486900 |
| C             | 2.86337700  | 4.91213400  | 1.49983600  | C | -5.62119000 | -0.59789500 | 2.98808300  |
| H             | 1.91704200  | 4.61151800  | 1.95936400  | H | -6.19630800 | 0.01531800  | 3.69158800  |
| H             | 3.60532800  | 5.04610100  | 2.29408300  | H | -5.21234500 | -1.45404100 | 3.53277000  |
| H             | 2.72078300  | 5.88211900  | 1.01156500  | H | -6.30635900 | -0.98556600 | 2.22841600  |
| H             | 0.06207300  | 5.78486800  | -1.83559500 | C | -3.53489300 | 0.75008600  | 3.43651100  |
| H             | 1.85538600  | 5.03745600  | -3.56499300 | H | -4.07593800 | 1.35676400  | 4.17240800  |
| <b>TS14as</b> |             |             |             | H | -2.74314200 | 1.36110800  | 2.99729700  |
| Rh            | -1.43060300 | -0.93290500 | -0.49856700 | H | -3.06470200 | -0.08494000 | 3.96882600  |
| N             | -0.38992600 | -2.00604000 | 0.66509700  | C | -5.10517200 | 1.43351000  | 1.58690100  |
| C             | -1.26206400 | -2.35427600 | -2.30527300 | H | -5.67324400 | 2.07455500  | 2.27133200  |
| C             | -0.78607800 | -1.03940200 | -2.62884800 | H | -5.79022000 | 1.09605900  | 0.79996600  |
| C             | -1.90015400 | -0.12231100 | -2.49918100 | H | -4.31690400 | 2.03411300  | 1.12662600  |
| C             | -3.05917500 | -0.90167000 | -2.13924200 | C | -0.41308400 | 1.61025000  | 0.86679500  |
| C             | -2.67751500 | -2.27380700 | -2.04939800 | C | 0.21222400  | 1.92156100  | 2.09371100  |
| O             | -4.00911100 | -1.80464800 | 1.11182300  | C | -1.46029600 | 2.44465600  | 0.43353400  |
| C             | 0.71818200  | -2.62169700 | 1.00074600  | C | -0.16866100 | 3.03930000  | 2.83318500  |
| C             | 1.86415200  | -2.26519900 | 0.09234300  | H | 1.01139400  | 1.28122300  | 2.45325000  |
| C             | 2.11193800  | -1.01444300 | -0.36000300 | C | -1.83205000 | 3.57086100  | 1.16407000  |
| O             | 0.83818100  | -3.47834100 | 1.90876900  | H | -1.97957500 | 2.20224300  | -0.48235600 |
| C             | 0.04832500  | 0.43487000  | 0.11196500  | C | -1.18867700 | 3.87597800  | 2.36723700  |
| C             | 1.38720100  | 0.22559800  | -0.11209500 | H | 0.32889400  | 3.25595600  | 3.77450500  |
| C             | -3.70587800 | -0.63279400 | 1.34804500  | H | -2.63101000 | 4.20920600  | 0.79710300  |
| O             | -2.71922000 | 0.03053400  | 0.80765000  | H | -1.48447500 | 4.75001500  | 2.94063900  |
| C             | -4.50382000 | 0.23828800  | 2.35246100  | N | 2.29435300  | 1.32746600  | -0.07294300 |
| C             | 0.54966400  | -0.68781600 | -3.19355000 | N | 1.88594300  | 2.32753400  | -0.75000400 |
| H             | 0.49248900  | -0.72597400 | -4.28922300 | N | 2.58554400  | 3.43935200  | -0.66016600 |
| H             | 1.32188300  | -1.38727300 | -2.87227900 | C | 2.11450500  | 4.53793900  | -1.53131900 |

|             |             |             |             |   |             |             |             |
|-------------|-------------|-------------|-------------|---|-------------|-------------|-------------|
| H           | 2.75671900  | 5.38853300  | -1.29132600 | C | 0.18076000  | -1.96595700 | -1.81850300 |
| C           | 2.31070000  | 4.18258400  | -3.00872100 | C | 1.49155800  | -2.03873300 | -1.38985700 |
| H           | 1.69444200  | 3.31981700  | -3.28066800 | O | -1.75357600 | -0.50559600 | -1.80905100 |
| H           | 3.35674300  | 3.93667100  | -3.21692100 | C | 1.35068200  | 0.13484600  | -0.34593300 |
| C           | 0.66704200  | 4.91916700  | -1.20775500 | C | 2.12023500  | -0.99150600 | -0.67471900 |
| H           | -0.01357500 | 4.09888800  | -1.44903400 | C | -2.97945100 | -0.63531500 | 1.44863400  |
| H           | 0.55233100  | 5.15064200  | -0.14503000 | O | -1.88018800 | -0.05459700 | 1.07766700  |
| C           | 3.73167100  | 3.61522500  | 0.26018300  | C | -2.75469000 | -1.59914500 | 2.64462200  |
| H           | 3.85095400  | 2.64275200  | 0.73925100  | C | -0.11234800 | 3.74464100  | -1.89544000 |
| C           | 5.01417700  | 3.94172800  | -0.51103800 | H | -0.14581600 | 4.82425000  | -2.08814400 |
| H           | 5.23308100  | 3.16627500  | -1.25157700 | H | 0.09034200  | 3.23728100  | -2.84099400 |
| H           | 5.85722200  | 3.99699200  | 0.18547800  | H | 0.72314000  | 3.55070500  | -1.21869400 |
| H           | 4.94694200  | 4.90526900  | -1.02730700 | C | -2.63743400 | 2.44484000  | -3.44047400 |
| C           | 3.39876500  | 4.65488400  | 1.33642300  | H | -1.66174300 | 2.45664600  | -3.93027100 |
| H           | 2.48682500  | 4.37506200  | 1.87279600  | H | -3.27009600 | 3.20184200  | -3.91977200 |
| H           | 4.22005900  | 4.71095800  | 2.05875100  | H | -3.09220800 | 1.46635000  | -3.61441200 |
| H           | 3.26035600  | 5.65474300  | 0.91084500  | C | -4.90561900 | 1.86138500  | -1.26228300 |
| H           | 0.37169100  | 5.79829400  | -1.79005000 | H | -4.94309800 | 1.38739000  | -2.24588500 |
| H           | 2.02162000  | 5.02565700  | -3.64482500 | H | -5.66740600 | 2.65097100  | -1.23799800 |
| H           | 3.05135200  | -0.86954100 | -0.89292600 | H | -5.14563400 | 1.10856100  | -0.50864000 |
| C           | 2.78919800  | -3.42407200 | -0.25473900 | C | -3.82316200 | 2.77161800  | 1.57639200  |
| H           | 2.99694300  | -3.42018800 | -1.32963200 | H | -4.44045500 | 1.87245200  | 1.59448200  |
| H           | 2.27720600  | -4.36042000 | -0.01573300 | H | -4.47071800 | 3.65031300  | 1.68932400  |
| C           | 4.09902500  | -3.35387500 | 0.51408100  | H | -3.14485600 | 2.74039600  | 2.43186000  |
| C           | 4.10468800  | -3.48585400 | 1.91145700  | C | -0.88170200 | 3.99300100  | 1.17736100  |
| C           | 5.31158200  | -3.13540600 | -0.15086200 | H | -1.07035100 | 3.55514400  | 2.15900200  |
| C           | 5.30177600  | -3.41183400 | 2.62313400  | H | -1.10489900 | 5.06639700  | 1.23758900  |
| H           | 3.15474000  | -3.63173600 | 2.41925200  | H | 0.18151000  | 3.88207300  | 0.95866700  |
| C           | 6.51222000  | -3.05966900 | 0.56256500  | C | -4.02277000 | -2.42211300 | 2.90471200  |
| H           | 5.31852700  | -3.02880700 | -1.23315700 | H | -3.88279500 | -3.06845600 | 3.77944800  |
| C           | 6.51085700  | -3.19851900 | 1.95153000  | H | -4.25896300 | -3.05755000 | 2.04654900  |
| H           | 5.29279500  | -3.51719100 | 3.70498900  | H | -4.88315500 | -1.77204000 | 3.08564400  |
| H           | 7.44570900  | -2.89241000 | 0.03147300  | C | -1.56833200 | -2.53427300 | 2.34159000  |
| H           | 7.44246400  | -3.13885000 | 2.50776000  | H | -1.41153600 | -3.23379500 | 3.17204600  |
| <b>15as</b> |             |             |             | H | -0.64825500 | -1.96397000 | 2.19118400  |
| Rh          | -1.77800500 | 1.27533000  | -0.52347300 | H | -1.75019500 | -3.12036000 | 1.43594600  |
| N           | 0.08360300  | 0.21903700  | -0.80558900 | C | -2.43323700 | -0.72895700 | 3.87775200  |
| C           | -2.51954300 | 2.72374700  | -1.97681400 | H | -2.26442300 | -1.35897200 | 4.75936400  |
| C           | -1.40404600 | 3.29159100  | -1.29385500 | H | -3.26102500 | -0.04661700 | 4.10635200  |
| C           | -1.73001800 | 3.35984800  | 0.12282500  | H | -1.53532100 | -0.12740000 | 3.70726800  |
| C           | -3.07005700 | 2.86367500  | 0.28910300  | C | 1.75977800  | 1.17807800  | 0.63511000  |
| C           | -3.55283900 | 2.43575100  | -0.98931300 | C | 1.12790200  | 1.17068000  | 1.88978800  |
| O           | -4.10578900 | -0.45035700 | 0.97195600  | C | 2.72366000  | 2.15492500  | 0.35907700  |
| C           | -0.51864600 | -0.76657700 | -1.51379300 | C | 1.49496700  | 2.09557400  | 2.86729700  |

|   |             |             |             |                |             |             |             |
|---|-------------|-------------|-------------|----------------|-------------|-------------|-------------|
| H | 0.34213600  | 0.44493600  | 2.07664700  | H              | -3.73684100 | -5.91327500 | 0.83689800  |
| C | 3.07506200  | 3.09375200  | 1.33327200  | <b>TS14a's</b> |             |             |             |
| H | 3.19794000  | 2.16970100  | -0.61464600 | Rh             | -1.41691300 | -0.56504400 | -0.79734700 |
| C | 2.47207400  | 3.05747000  | 2.59302500  | N              | -0.63881100 | -2.20196700 | -0.18892400 |
| H | 1.01133100  | 2.07122100  | 3.84010500  | C              | -1.99157200 | -1.44749000 | -2.88708700 |
| H | 3.82725500  | 3.84502200  | 1.10929200  | C              | -0.96309300 | -0.41792100 | -2.94476100 |
| H | 2.75591500  | 3.77925300  | 3.35394900  | C              | -1.57385700 | 0.84897100  | -2.59225600 |
| N | 3.43379100  | -1.25116100 | -0.21710600 | C              | -2.89849700 | 0.56718700  | -2.17236900 |
| N | 4.27201900  | -0.32628100 | -0.46496700 | C              | -3.16134500 | -0.85882400 | -2.36735500 |
| N | 5.49145100  | -0.50424800 | 0.03055100  | O              | -3.32253600 | -2.30723500 | 1.07368700  |
| C | 6.52553500  | 0.38173300  | -0.54832400 | C              | 0.29088500  | -2.47919600 | 0.71703100  |
| H | 7.47560700  | -0.01449800 | -0.18540900 | C              | 1.49141500  | -2.35868900 | -0.19408400 |
| C | 6.53729500  | 0.30884200  | -2.08012000 | C              | 1.99881800  | -1.12109300 | -0.47673100 |
| H | 5.60411200  | 0.70102400  | -2.49481400 | O              | 0.27817600  | -2.87111400 | 1.88136600  |
| H | 6.65594700  | -0.72440700 | -2.42137400 | C              | 0.10577400  | 0.46480700  | 0.12026900  |
| C | 6.37790900  | 1.81839900  | -0.03807400 | C              | 1.44043500  | 0.15843300  | -0.12567600 |
| H | 5.46268500  | 2.27489600  | -0.42239000 | C              | -3.26369000 | -1.13529600 | 1.44557700  |
| H | 6.34101100  | 1.84317700  | 1.05511400  | O              | -2.61469300 | -0.16774900 | 0.85957000  |
| C | 5.84026500  | -1.71245300 | 0.80922200  | C              | -3.97498900 | -0.64574900 | 2.73747600  |
| H | 4.91132400  | -1.98540800 | 1.31649400  | C              | 0.40398000  | -0.58812200 | -3.52769600 |
| C | 6.24120200  | -2.86328200 | -0.12169000 | H              | 0.37311400  | -0.45951000 | -4.61788300 |
| H | 5.44899700  | -3.06025400 | -0.84963000 | H              | 0.80186400  | -1.58432600 | -3.31967100 |
| H | 6.41259500  | -3.77842900 | 0.45564700  | H              | 1.10136200  | 0.14900000  | -3.12253800 |
| H | 7.16382200  | -2.62592500 | -0.66298200 | C              | -1.75972600 | -2.88043900 | -3.24109600 |
| C | 6.89838200  | -1.41809500 | 1.87448800  | H              | -1.50524100 | -2.97661400 | -4.30294400 |
| H | 6.62037600  | -0.55119900 | 2.48195500  | H              | -2.64036900 | -3.49384500 | -3.04134300 |
| H | 6.98142900  | -2.28469100 | 2.53844000  | H              | -0.92624000 | -3.28772800 | -2.65858200 |
| H | 7.89059800  | -1.24054500 | 1.44733700  | C              | -4.47819300 | -1.50519000 | -2.07524700 |
| H | 7.22691900  | 2.42527800  | -0.37054900 | H              | -4.39738800 | -2.59318100 | -2.05109800 |
| H | 7.36777600  | 0.90099400  | -2.47854800 | H              | -5.22060700 | -1.23213600 | -2.83612200 |
| H | 2.07680500  | -2.93450500 | -1.58454300 | H              | -4.85952100 | -1.17816100 | -1.10460200 |
| C | -0.53579300 | -3.09910600 | -2.51906300 | C              | -3.92929400 | 1.52005900  | -1.65698200 |
| H | 0.20657700  | -3.77104900 | -2.96186800 | H              | -4.19543400 | 1.26317400  | -0.62574100 |
| H | -1.13791100 | -2.68986100 | -3.33752900 | H              | -4.84095500 | 1.45759300  | -2.26188400 |
| C | -1.43809300 | -3.88857700 | -1.58118700 | H              | -3.57858800 | 2.55416200  | -1.67695500 |
| C | -2.76007500 | -3.48411100 | -1.34546100 | C              | -0.89900800 | 2.18122000  | -2.71281100 |
| C | -0.95475200 | -5.02481000 | -0.91777600 | H              | -1.50962000 | 2.98231700  | -2.29250600 |
| C | -3.58378700 | -4.21173900 | -0.48415400 | H              | -0.72007200 | 2.41301400  | -3.77003000 |
| H | -3.12861200 | -2.58381900 | -1.82526300 | H              | 0.06598400  | 2.18538300  | -2.19934300 |
| C | -1.77505800 | -5.75091000 | -0.05062300 | C              | -4.77274100 | -1.79775900 | 3.36044600  |
| H | 0.07053000  | -5.34618000 | -1.08649300 | H              | -5.27472800 | -1.45960100 | 4.27462000  |
| C | -3.09576100 | -5.34923100 | 0.16503400  | H              | -4.11839300 | -2.63602600 | 3.61554500  |
| H | -4.60649600 | -3.88525000 | -0.31699100 | H              | -5.53358500 | -2.17222700 | 2.66856900  |
| H | -1.38359100 | -6.63172700 | 0.45163100  | C              | -2.88582600 | -0.15835700 | 3.71502800  |

|   |             |             |             |            |             |             |             |
|---|-------------|-------------|-------------|------------|-------------|-------------|-------------|
| H | -3.33988100 | 0.16809400  | 4.65850700  | H          | 1.42177300  | -4.46809300 | -0.53334100 |
| H | -2.32647600 | 0.67813300  | 3.28872000  | C          | 3.42383000  | -3.95030800 | 0.06503000  |
| H | -2.17455500 | -0.96095000 | 3.94197700  | C          | 3.43379200  | -4.03310500 | 1.46622100  |
| C | -4.91346300 | 0.52334300  | 2.38387300  | C          | 4.61894800  | -4.15268100 | -0.63482800 |
| H | -5.43400900 | 0.87900000  | 3.28113600  | C          | 4.61572100  | -4.32260500 | 2.14767100  |
| H | -5.67473200 | 0.21520400  | 1.65687200  | H          | 2.51118500  | -3.85244900 | 2.01253200  |
| H | -4.34946200 | 1.35806500  | 1.95978000  | C          | 5.80404600  | -4.44352000 | 0.04832700  |
| C | -0.25862900 | 1.54830300  | 1.03783300  | H          | 4.62303900  | -4.08578600 | -1.72016500 |
| C | 0.46073900  | 1.70410000  | 2.24695900  | C          | 5.80538800  | -4.53094300 | 1.44136100  |
| C | -1.35800000 | 2.40217500  | 0.81986200  | H          | 4.60988400  | -4.38417000 | 3.23274600  |
| C | 0.10489000  | 2.67598100  | 3.17737900  | H          | 6.72363000  | -4.59958700 | -0.50951100 |
| H | 1.29968700  | 1.04672600  | 2.44959800  | H          | 6.72532900  | -4.75496600 | 1.97444800  |
| C | -1.70178400 | 3.38852000  | 1.74035900  | <b>13s</b> |             |             |             |
| H | -1.93809500 | 2.29032400  | -0.08324400 | C          | 1.30599500  | -0.14195000 | -2.67021400 |
| C | -0.97507100 | 3.53056200  | 2.92590000  | C          | 0.96704300  | 1.24441100  | -2.64284000 |
| H | 0.66645000  | 2.76446500  | 4.10319700  | C          | 2.17068200  | 2.00018700  | -2.27541200 |
| H | -2.54562000 | 4.04175800  | 1.53594800  | C          | 3.18712100  | 1.08710700  | -1.96852300 |
| H | -1.25098500 | 4.29156900  | 3.65029900  | C          | 2.64481900  | -0.26307500 | -2.14651300 |
| N | 2.45525200  | 1.15511700  | 0.00401900  | Rh         | 1.41160600  | 0.62349700  | -0.56884300 |
| N | 2.10433200  | 2.27821700  | -0.48827600 | C          | 2.25132200  | 3.49268800  | -2.22474500 |
| N | 2.91598700  | 3.29747200  | -0.29910400 | C          | -0.31112300 | 1.83971300  | -3.14816400 |
| C | 2.43556500  | 4.57951000  | -0.86122600 | H          | -0.24378700 | 2.04285200  | -4.22527600 |
| H | 3.14770600  | 5.32961600  | -0.50960500 | H          | -1.15385400 | 1.16451500  | -2.98327000 |
| C | 2.47501400  | 4.55108400  | -2.39223800 | H          | -0.53531000 | 2.78411800  | -2.64704600 |
| H | 1.78986300  | 3.79132500  | -2.78121500 | C          | 0.40442500  | -1.23307900 | -3.16470000 |
| H | 3.48260500  | 4.32418900  | -2.75430800 | C          | 3.48777600  | -1.49757200 | -2.03976000 |
| C | 1.04842100  | 4.94005800  | -0.31854100 | H          | 2.96967900  | -2.38090400 | -2.41729500 |
| H | 0.29536500  | 4.23288400  | -0.67314400 | H          | 4.40748000  | -1.37138800 | -2.62273500 |
| H | 1.03948100  | 4.92494700  | 0.77506800  | H          | 3.77433900  | -1.68891500 | -1.00134200 |
| C | 4.11841000  | 3.23162200  | 0.56349600  | C          | 4.57814000  | 1.38577200  | -1.50322000 |
| H | 4.26361100  | 2.16783500  | 0.75392700  | H          | 4.94685400  | 0.58741300  | -0.85449500 |
| C | 5.35386600  | 3.76999500  | -0.16308300 | H          | 5.26610400  | 1.46760900  | -2.35483500 |
| H | 5.51257200  | 3.24314200  | -1.10901900 | H          | 4.61510800  | 2.31463500  | -0.93208300 |
| H | 6.23837600  | 3.61832000  | 0.46417700  | C          | -4.90905900 | 3.71828300  | -2.03777600 |
| H | 5.27834500  | 4.84244600  | -0.37119500 | C          | -3.55574300 | 3.70976200  | -1.69529500 |
| C | 3.85199200  | 3.93977200  | 1.89714800  | C          | -3.15829700 | 3.76134500  | -0.35219500 |
| H | 2.97283900  | 3.51421300  | 2.39007700  | C          | -4.14299200 | 3.81667900  | 0.64263300  |
| H | 4.71388100  | 3.81908200  | 2.56185400  | C          | -5.49773300 | 3.82567800  | 0.30348600  |
| H | 3.68433100  | 5.01301400  | 1.75571400  | C          | -5.88418600 | 3.77676800  | -1.03828300 |
| H | 0.76585100  | 5.94352200  | -0.65399700 | H          | -5.20183600 | 3.68104600  | -3.08352100 |
| H | 2.17308400  | 5.52290400  | -2.79640800 | H          | -2.79931300 | 3.66187400  | -2.47463700 |
| H | 2.99467400  | -1.08648700 | -0.91771900 | H          | -3.84455800 | 3.84838700  | 1.68758700  |
| C | 2.13078900  | -3.64558800 | -0.67803000 | H          | -6.25002900 | 3.87095700  | 1.08619900  |
| H | 2.33120700  | -3.58265300 | -1.75245200 | H          | -6.93776900 | 3.78488600  | -1.30335700 |

|   |             |             |             |              |             |             |             |
|---|-------------|-------------|-------------|--------------|-------------|-------------|-------------|
| C | -1.69402400 | 3.71325600  | 0.01564600  | N            | -2.42179200 | -1.07831800 | 0.58771000  |
| H | -1.10187500 | 4.22631700  | -0.75597800 | N            | -2.41494400 | -2.15061400 | -0.09316100 |
| H | -1.53010200 | 4.27392100  | 0.94728600  | N            | -3.29382100 | -3.08578300 | 0.23769100  |
| C | -1.13113600 | 2.31620100  | 0.18418000  | C            | -3.24487400 | -4.29779100 | -0.60498700 |
| C | -1.82380400 | 1.17145500  | 0.05305600  | H            | -3.98305800 | -4.97900300 | -0.17342300 |
| H | -2.88609300 | 1.27467000  | -0.14049600 | C            | -3.66673000 | -3.97628000 | -2.04289400 |
| C | 0.93007200  | 3.23520500  | 0.87058300  | H            | -2.95853400 | -3.27885700 | -2.50117600 |
| N | 0.27554500  | 2.26309200  | 0.46860700  | H            | -4.66145700 | -3.51968500 | -2.06544400 |
| O | 1.52420400  | 4.17449900  | 1.22760900  | C            | -1.86979100 | -4.97145400 | -0.54107100 |
| C | 3.27946500  | 0.82769100  | 1.73119500  | H            | -1.10144100 | -4.32266500 | -0.96763300 |
| C | 4.09981100  | 0.16269100  | 2.86763200  | H            | -1.58893100 | -5.19137400 | 0.49289100  |
| C | 5.15499000  | 1.14088300  | 3.39931100  | C            | -4.16311500 | -3.00177800 | 1.42953300  |
| H | 5.72136700  | 0.68212000  | 4.21862800  | H            | -3.99143300 | -1.99889700 | 1.82282200  |
| H | 5.86136100  | 1.42529300  | 2.61245400  | C            | -5.64121600 | -3.12812600 | 1.04690800  |
| H | 4.68947500  | 2.05819000  | 3.76971200  | H            | -5.91504600 | -2.37663500 | 0.29976200  |
| C | 4.77879200  | -1.11176900 | 2.33241600  | H            | -6.26764100 | -2.97489100 | 1.93215200  |
| H | 5.36578600  | -1.59507000 | 3.12303200  | H            | -5.87747400 | -4.11865100 | 0.64311500  |
| H | 4.03516600  | -1.82398400 | 1.96730600  | C            | -3.73062500 | -4.02396300 | 2.48774900  |
| H | 5.46177600  | -0.87789700 | 1.50651200  | H            | -2.67619500 | -3.88585300 | 2.74552600  |
| C | 3.11111300  | -0.21370500 | 3.99047600  | H            | -4.32836300 | -3.89576200 | 3.39673300  |
| H | 3.64141800  | -0.68050400 | 4.82956200  | H            | -3.86994300 | -5.05313600 | 2.13920400  |
| H | 2.59352800  | 0.67450700  | 4.37257100  | H            | -1.88341200 | -5.91107900 | -1.10415500 |
| H | 2.35775200  | -0.91638100 | 3.62305800  | H            | -3.69147800 | -4.88899900 | -2.64765300 |
| O | 2.49347700  | 0.00048900  | 1.12505900  | <b>TS12s</b> |             |             |             |
| O | 3.38244600  | 2.03965200  | 1.48925700  | C            | 1.44673500  | -0.74378900 | -2.74338600 |
| H | 3.05089600  | 3.83294200  | -1.56301800 | C            | 0.96282200  | 0.60380000  | -2.95150400 |
| H | 2.44901600  | 3.89534600  | -3.22644900 | C            | 2.09150200  | 1.51571900  | -2.80836800 |
| H | 1.30859700  | 3.93270300  | -1.88635700 | C            | 3.20291600  | 0.76511600  | -2.37937300 |
| H | -0.49866900 | -1.31345000 | -2.55190600 | C            | 2.80014600  | -0.64099600 | -2.32213200 |
| H | 0.09483500  | -1.02125600 | -4.19451700 | Rh           | 1.48639300  | 0.47116600  | -0.81804800 |
| H | 0.90452300  | -2.20355300 | -3.15838200 | C            | 2.00132500  | 2.99539600  | -3.00054500 |
| C | -1.34531000 | -0.19970100 | 0.23189200  | C            | -0.38638800 | 0.96817500  | -3.48605900 |
| C | -0.04948700 | -0.61716400 | 0.16763400  | H            | -0.38275800 | 0.95142300  | -4.58415200 |
| C | 0.37316700  | -1.91248900 | 0.74133600  | H            | -1.14894600 | 0.26435400  | -3.14372700 |
| C | 1.12002100  | -2.86267200 | 0.02805900  | H            | -0.68263100 | 1.97170000  | -3.16958000 |
| C | 0.07998600  | -2.19734400 | 2.09181800  | C            | 0.63275200  | -1.98300100 | -2.96172900 |
| C | 1.55008400  | -4.04884700 | 0.62403600  | C            | 3.74477500  | -1.74287200 | -1.95589600 |
| H | 1.35311100  | -2.67175600 | -1.00929800 | H            | 3.27795800  | -2.72630000 | -2.03962400 |
| C | 0.51073000  | -3.37947700 | 2.69272000  | H            | 4.61869300  | -1.72797600 | -2.61759800 |
| H | -0.49305900 | -1.47683000 | 2.66723200  | H            | 4.10377100  | -1.61591200 | -0.92890400 |
| C | 1.25139800  | -4.31578900 | 1.96234100  | C            | 4.57327100  | 1.25203400  | -2.02352300 |
| H | 2.11808100  | -4.76735300 | 0.03813500  | H            | 4.92695300  | 0.76379600  | -1.11001100 |
| H | 0.27377300  | -3.56726400 | 3.73701700  | H            | 5.29265800  | 1.02303200  | -2.81983000 |
| H | 1.59092500  | -5.23554100 | 2.43045300  | H            | 4.58491600  | 2.33077700  | -1.85349800 |



|   |             |             |             |              |             |             |             |
|---|-------------|-------------|-------------|--------------|-------------|-------------|-------------|
| C | -5.40787200 | 4.73587400  | -0.07308100 | C            | 0.26216300  | -1.69347300 | 0.90741500  |
| C | -4.18748900 | 4.40506400  | -0.67096200 | C            | 1.28308500  | -2.60285300 | 0.57271100  |
| C | -3.06764000 | 4.10628700  | 0.11333500  | C            | -0.39763500 | -1.87843100 | 2.14468200  |
| C | -3.18939600 | 4.13285500  | 1.51150600  | C            | 1.61045900  | -3.66638700 | 1.41071900  |
| C | -4.40599300 | 4.46250800  | 2.10795200  | H            | 1.81690900  | -2.46979200 | -0.35647800 |
| C | -5.52005700 | 4.76682200  | 1.31776200  | C            | -0.05862700 | -2.93019900 | 2.99238300  |
| H | -6.26843000 | 4.96650700  | -0.69548000 | H            | -1.17906000 | -1.18320300 | 2.43434700  |
| H | -4.10488900 | 4.38142600  | -1.75493100 | C            | 0.94404300  | -3.83623000 | 2.62756200  |
| H | -2.32624400 | 3.87582400  | 2.12082600  | H            | 2.39387000  | -4.35958000 | 1.11631200  |
| H | -4.48692100 | 4.47993700  | 3.19161300  | H            | -0.57448800 | -3.04097500 | 3.94235600  |
| H | -6.46752500 | 5.02192300  | 1.78447400  | H            | 1.20629700  | -4.65842700 | 3.28734000  |
| C | -1.73695400 | 3.74989300  | -0.53183300 | N            | -2.47248900 | -1.02533800 | 0.06951200  |
| H | -1.83988300 | 3.76297700  | -1.62205600 | N            | -2.24325700 | -2.16012400 | -0.46433700 |
| H | -0.98828800 | 4.50718800  | -0.27503600 | N            | -3.12131300 | -3.11863000 | -0.25135900 |
| C | -1.23488100 | 2.39260500  | -0.08006400 | C            | -2.78807900 | -4.40749300 | -0.89647000 |
| C | -1.83621200 | 1.21518300  | -0.41071800 | H            | -3.57382400 | -5.09735300 | -0.58001300 |
| H | -2.82541300 | 1.27961500  | -0.86411100 | C            | -2.83863200 | -4.28316800 | -2.42245800 |
| C | -0.07941100 | 2.38672200  | 0.92052500  | H            | -2.06471900 | -3.59635800 | -2.77870700 |
| N | 0.85337300  | 2.10386200  | 0.02942900  | H            | -3.81225000 | -3.90775500 | -2.75308000 |
| O | -0.14388000 | 2.71488200  | 2.09853800  | C            | -1.44022900 | -4.94114900 | -0.40009900 |
| C | 3.08982900  | 0.93616800  | 1.58915300  | H            | -0.62604000 | -4.28354000 | -0.71358900 |
| C | 3.87305100  | 0.44512800  | 2.83545200  | H            | -1.42201600 | -5.00412000 | 0.69162000  |
| C | 4.77592300  | 1.56783000  | 3.36413900  | C            | -4.27718700 | -2.98312800 | 0.66331600  |
| H | 5.27971700  | 1.24675000  | 4.28308800  | H            | -4.27230500 | -1.93332900 | 0.95869500  |
| H | 5.54649800  | 1.83240800  | 2.63124300  | C            | -5.59195300 | -3.28108200 | -0.06312300 |
| H | 4.19501100  | 2.46749800  | 3.57962400  | H            | -5.71095000 | -2.63263000 | -0.93661300 |
| C | 4.70916400  | -0.80114200 | 2.50662300  | H            | -6.43415300 | -3.10107900 | 0.61321400  |
| H | 5.24448500  | -1.13960100 | 3.40161800  | H            | -5.65075800 | -4.32326200 | -0.39477900 |
| H | 4.07685900  | -1.61757100 | 2.15090400  | C            | -4.07685700 | -3.84641600 | 1.91469700  |
| H | 5.45475900  | -0.58417900 | 1.73294600  | H            | -3.13220700 | -3.59628200 | 2.40722000  |
| C | 2.79519200  | 0.09098800  | 3.88453400  | H            | -4.89337200 | -3.66662500 | 2.62210300  |
| H | 3.27005200  | -0.25428300 | 4.81051900  | H            | -4.07149000 | -4.91540600 | 1.67560600  |
| H | 2.17740500  | 0.96360600  | 4.12109500  | H            | -1.25798200 | -5.94019400 | -0.80996800 |
| H | 2.13628900  | -0.70283400 | 3.51843800  | H            | -2.67006300 | -5.25998600 | -2.88774300 |
| O | 2.70755400  | -0.01822900 | 0.80615400  | <b>TS14I</b> |             |             |             |
| O | 2.82526300  | 2.14137400  | 1.45775700  | C            | -1.68782400 | 0.14906000  | -2.79235200 |
| H | 2.94876200  | 3.48987500  | -2.77644000 | C            | -1.69748800 | -1.25583900 | -2.51635200 |
| H | 1.72697700  | 3.23102400  | -4.03531100 | C            | -2.98974300 | -1.59927300 | -1.91326900 |
| H | 1.23507900  | 3.42406500  | -2.34553700 | C            | -3.69149300 | -0.40065800 | -1.71400800 |
| H | -0.31419400 | -1.93461800 | -2.41674600 | C            | -2.87093800 | 0.71289200  | -2.20125300 |
| H | 0.40253300  | -2.09791500 | -4.02797300 | Rh           | -1.68892800 | -0.19719300 | -0.60195300 |
| H | 1.16386900  | -2.87904100 | -2.63473900 | C            | -3.43139400 | -2.97015000 | -1.49475900 |
| C | -1.37905500 | -0.12019900 | -0.09873000 | C            | -0.64016800 | -2.23325700 | -2.93385800 |
| C | -0.06725500 | -0.52726900 | 0.07574000  | H            | -0.79024000 | -2.55541500 | -3.97183200 |

|   |             |             |             |   |             |             |             |
|---|-------------|-------------|-------------|---|-------------|-------------|-------------|
| H | 0.35517300  | -1.79142100 | -2.84829400 | H | -2.24237400 | 1.32004500  | 3.73607200  |
| H | -0.65823000 | -3.12434300 | -2.30210900 | O | -2.56059000 | 0.48328000  | 1.21192800  |
| C | -0.64094200 | 0.87630100  | -3.57619900 | O | -3.19356900 | -1.63740000 | 1.61637300  |
| C | -3.31173300 | 2.14278100  | -2.27763800 | H | -3.93028300 | -2.93646700 | -0.52308000 |
| H | -2.45702700 | 2.81934100  | -2.32938800 | H | -4.11939300 | -3.40775300 | -2.22802400 |
| H | -3.94360700 | 2.30982200  | -3.15970400 | H | -2.58071400 | -3.64943100 | -1.39856100 |
| H | -3.88743500 | 2.42168600  | -1.39185900 | H | 0.35773700  | 0.49023900  | -3.35807800 |
| C | -5.01534400 | -0.23727100 | -1.03453400 | H | -0.82729400 | 0.75426100  | -4.65046200 |
| H | -4.99940400 | 0.63310100  | -0.37321200 | H | -0.64288500 | 1.94229700  | -3.34898900 |
| H | -5.81516600 | -0.08497800 | -1.76949900 | C | 1.15706500  | 0.49940100  | -0.03871500 |
| H | -5.26111700 | -1.11216100 | -0.42990200 | C | -0.08395500 | 1.01766900  | -0.26299600 |
| C | 4.46421500  | -3.83575600 | -1.46753800 | C | -0.32171500 | 2.46877700  | -0.40582500 |
| C | 3.09728800  | -3.77141900 | -1.19135300 | C | 0.41208400  | 3.23666200  | -1.33518000 |
| C | 2.64028400  | -3.55782900 | 0.11434100  | C | -1.32194000 | 3.12454500  | 0.33819600  |
| C | 3.58157800  | -3.41153100 | 1.14151300  | C | 0.14940500  | 4.59314400  | -1.52067700 |
| C | 4.94870700  | -3.47208400 | 0.87016700  | H | 1.19660400  | 2.75442300  | -1.90707400 |
| C | 5.39419900  | -3.68319700 | -0.43701500 | C | -1.57239900 | 4.48528300  | 0.16141300  |
| H | 4.80266900  | -4.00181000 | -2.48638300 | H | -1.90292700 | 2.54735900  | 1.04614800  |
| H | 2.37469400  | -3.87740300 | -1.99697600 | C | -0.84599100 | 5.22752300  | -0.77227200 |
| H | 3.23684100  | -3.23236300 | 2.15671000  | H | 0.72681600  | 5.15697400  | -2.24905300 |
| H | 5.66534100  | -3.34923400 | 1.67702100  | H | -2.34580500 | 4.96697600  | 0.75449500  |
| H | 6.45815900  | -3.72758900 | -0.65051900 | H | -1.05009100 | 6.28512700  | -0.91450000 |
| C | 1.16547900  | -3.40460600 | 0.40162800  | N | 2.22545800  | 1.42388000  | 0.14818900  |
| H | 0.57934400  | -4.01629900 | -0.29914000 | N | 3.36720200  | 0.89228000  | 0.25910500  |
| H | 0.94016100  | -3.80674700 | 1.39762600  | N | 4.40001900  | 1.73758900  | 0.39689400  |
| C | 0.68134600  | -1.96500200 | 0.31971700  | C | 5.63489500  | 1.05787600  | 0.83212400  |
| C | 1.48202600  | -0.92733100 | 0.02455800  | H | 6.36260300  | 1.85375700  | 1.01009400  |
| H | 2.52682700  | -1.15809100 | -0.12909400 | C | 5.43720100  | 0.27706900  | 2.14156000  |
| C | -1.39267100 | -2.60995800 | 1.17487200  | H | 4.72938400  | -0.54139400 | 1.98524800  |
| N | -0.71393700 | -1.73369100 | 0.56449200  | H | 5.04810600  | 0.92437000  | 2.93262200  |
| O | -1.64273500 | -3.64722100 | 1.66756400  | C | 6.16766100  | 0.15181800  | -0.28593900 |
| C | -3.18664100 | -0.40429000 | 1.88092300  | H | 5.45003700  | -0.64399400 | -0.50103900 |
| C | -3.95504300 | 0.11114500  | 3.11508200  | H | 6.33584100  | 0.72627500  | -1.20178900 |
| C | -4.84179800 | -0.99793700 | 3.69739800  | C | 4.17574200  | 3.18652900  | 0.57138100  |
| H | -5.36063100 | -0.63193700 | 4.59028200  | H | 3.28723600  | 3.39520800  | -0.02957800 |
| H | -5.59298100 | -1.32302300 | 2.97111800  | C | 3.84696600  | 3.53470600  | 2.02998900  |
| H | -4.24695100 | -1.87306500 | 3.96812900  | H | 2.99684000  | 2.94051900  | 2.37419100  |
| C | -4.80912500 | 1.32845200  | 2.71405200  | H | 3.58445800  | 4.59420900  | 2.12099100  |
| H | -5.31956700 | 1.73665100  | 3.59313800  | H | 4.70496100  | 3.34126000  | 2.68382200  |
| H | -4.18944600 | 2.11294400  | 2.27332300  | C | 5.34105000  | 4.00976400  | 0.01654400  |
| H | -5.57563400 | 1.04613800  | 1.98344900  | H | 5.59486100  | 3.69581000  | -1.00046100 |
| C | -2.88828000 | 0.53985800  | 4.14755200  | H | 5.05615100  | 5.06637400  | -0.01058800 |
| H | -3.37343000 | 0.92423500  | 5.05162000  | H | 6.24103100  | 3.93447400  | 0.63625900  |
| H | -2.25981200 | -0.30980600 | 4.43580800  | H | 7.11347800  | -0.31158400 | 0.01484300  |

|            |             |             |             |   |             |             |             |
|------------|-------------|-------------|-------------|---|-------------|-------------|-------------|
| H          | 6.38942400  | -0.14678100 | 2.47869900  | C | -5.39927900 | -1.33706300 | 2.61208000  |
| <b>151</b> |             |             |             | H | -6.18536800 | -1.23440400 | 3.36676000  |
| C          | -1.65520400 | 0.47944800  | -2.78112100 | H | -5.83920100 | -1.11776700 | 1.63363300  |
| C          | -1.52663700 | -0.94581800 | -2.59630900 | H | -5.04833900 | -2.37108800 | 2.61167500  |
| C          | -2.80874600 | -1.45523500 | -2.09951000 | C | -4.75112800 | 1.08983600  | 2.92235900  |
| C          | -3.62908800 | -0.34640000 | -1.84781300 | H | -5.53622200 | 1.21484400  | 3.67440400  |
| C          | -2.90195100 | 0.87401600  | -2.22165100 | H | -3.94269100 | 1.79109900  | 3.14391200  |
| Rh         | -1.65496200 | -0.09350700 | -0.62568400 | H | -5.16558900 | 1.35682300  | 1.94543000  |
| C          | -3.09373300 | -2.90071200 | -1.82526100 | C | -3.63708300 | -0.71193700 | 4.31434400  |
| C          | -0.38109000 | -1.78231100 | -3.08139300 | H | -4.41090800 | -0.64484700 | 5.08576700  |
| H          | -0.39574000 | -1.86696300 | -4.17528600 | H | -3.22689000 | -1.72481700 | 4.31041500  |
| H          | 0.57517600  | -1.34829100 | -2.77865100 | H | -2.83420600 | -0.01518500 | 4.57669300  |
| H          | -0.42831900 | -2.79032100 | -2.66455800 | O | -2.67256800 | 0.41474600  | 1.27077800  |
| C          | -0.64656100 | 1.34712200  | -3.46354200 | O | -2.74869800 | -1.79416500 | 1.76493400  |
| C          | -3.46855200 | 2.26133600  | -2.17932300 | H | -3.99912300 | -3.02643700 | -1.22777700 |
| H          | -2.67618700 | 3.00969300  | -2.11931900 | H | -3.22074900 | -3.46328700 | -2.75795800 |
| H          | -4.07756800 | 2.46795700  | -3.06904200 | H | -2.26857300 | -3.35601300 | -1.26874500 |
| H          | -4.10448500 | 2.39753700  | -1.30033900 | H | 0.36966500  | 1.04834800  | -3.19572800 |
| C          | -4.99912600 | -0.33665700 | -1.24253200 | H | -0.75493300 | 1.25428500  | -4.55142100 |
| H          | -5.04690500 | 0.37375700  | -0.41077800 | H | -0.76770000 | 2.39629900  | -3.19368400 |
| H          | -5.74947100 | -0.02548200 | -1.97924000 | C | 1.19230900  | 0.53655000  | -0.01672400 |
| H          | -5.28392500 | -1.32060500 | -0.86401800 | C | -0.04366900 | 1.08470000  | -0.19683200 |
| C          | 4.29348200  | -3.87983600 | -1.72809600 | C | -0.28881300 | 2.54001000  | -0.24642600 |
| C          | 2.92754700  | -3.76311200 | -1.46071000 | C | 0.48903000  | 3.38367500  | -1.07014900 |
| C          | 2.46445500  | -3.58258800 | -0.15224100 | C | -1.34321700 | 3.13422500  | 0.47594800  |
| C          | 3.40274900  | -3.52546300 | 0.88823800  | C | 0.22265400  | 4.74777300  | -1.16884100 |
| C          | 4.76813900  | -3.63679500 | 0.62661700  | H | 1.30695700  | 2.95076000  | -1.63343800 |
| C          | 5.21879800  | -3.81262700 | -0.68483100 | C | -1.60270000 | 4.50187000  | 0.38324600  |
| H          | 4.63460700  | -4.01891700 | -2.75036100 | H | -1.96074800 | 2.51172900  | 1.11047700  |
| H          | 2.21025900  | -3.80149000 | -2.27727200 | C | -0.82710500 | 5.31768400  | -0.44265500 |
| H          | 3.05314800  | -3.37331200 | 1.90607300  | H | 0.83683200  | 5.36832500  | -1.81658200 |
| H          | 5.48108600  | -3.58216300 | 1.44456500  | H | -2.41918600 | 4.93089100  | 0.95873800  |
| H          | 6.28205900  | -3.89710800 | -0.89055700 | H | -1.03520200 | 6.38123700  | -0.51946500 |
| C          | 0.99940000  | -3.36386100 | 0.13821700  | N | 2.27563800  | 1.42488600  | 0.23092400  |
| H          | 0.38210500  | -3.83834500 | -0.63848200 | N | 3.40054300  | 0.85126000  | 0.32133000  |
| H          | 0.72236900  | -3.84649900 | 1.07940900  | N | 4.45596500  | 1.65070200  | 0.52404400  |
| C          | 0.61038000  | -1.89239000 | 0.21800900  | C | 5.66368800  | 0.90275100  | 0.92457500  |
| C          | 1.47504400  | -0.89956400 | -0.06363800 | H | 6.41735600  | 1.66063300  | 1.15346100  |
| H          | 2.49596900  | -1.16806600 | -0.29188200 | C | 5.42658000  | 0.05291600  | 2.18336900  |
| C          | -1.31455300 | -2.18074100 | 1.55100000  | H | 4.68864000  | -0.72612300 | 1.97398700  |
| N          | -0.74420700 | -1.58875900 | 0.51244300  | H | 5.05692500  | 0.66548100  | 3.01059200  |
| O          | -0.93697200 | -2.98803400 | 2.37255500  | C | 6.17281200  | 0.04466500  | -0.24142800 |
| C          | -3.14112500 | -0.53879500 | 1.90295300  | H | 5.43522000  | -0.71986400 | -0.49899300 |
| C          | -4.24844300 | -0.36014300 | 2.93762700  | H | 6.35799300  | 0.66274100  | -1.12510000 |

|             |             |             |             |   |             |             |             |
|-------------|-------------|-------------|-------------|---|-------------|-------------|-------------|
| C           | 4.27830400  | 3.09276000  | 0.78754600  | H | -4.03592700 | -1.90045000 | 1.76753200  |
| H           | 3.40156400  | 3.36717800  | 0.19587800  | H | -3.67702000 | -2.05529000 | 3.49519200  |
| C           | 3.94879500  | 3.35927500  | 2.26300700  | H | -2.57921600 | -2.75460200 | 2.28269300  |
| H           | 3.07883800  | 2.77036700  | 2.56410400  | C | -3.56918500 | -0.74108900 | -1.35548400 |
| H           | 3.71716800  | 4.41861000  | 2.41816900  | O | -2.41230800 | -0.99518100 | -0.87103600 |
| H           | 4.79512000  | 3.09981400  | 2.90894100  | C | -4.17637700 | -1.87159500 | -2.21694300 |
| C           | 5.47400800  | 3.91013200  | 0.29208500  | C | -5.41429600 | -1.36275400 | -2.96944800 |
| H           | 5.72375100  | 3.65381800  | -0.74194600 | C | -4.57764900 | -3.01074300 | -1.25381500 |
| H           | 5.22504500  | 4.97542900  | 0.33208500  | C | -3.12059700 | -2.37632500 | -3.21990700 |
| H           | 6.36690000  | 3.76433500  | 0.90939300  | H | -6.16778000 | -0.98200200 | -2.27624800 |
| H           | 7.10548500  | -0.45893100 | 0.03457400  | H | -5.85479900 | -2.17427600 | -3.55952500 |
| H           | 6.35939700  | -0.42702000 | 2.49874300  | H | -5.14974200 | -0.54769100 | -3.64971600 |
| <b>14II</b> |             |             |             | H | -3.71561500 | -3.37311500 | -0.68768200 |
| Rh          | -1.30297000 | -0.05165800 | 0.73866400  | H | -4.99955500 | -3.85040200 | -1.81726600 |
| N           | -0.42248600 | 1.14258100  | -0.95535800 | H | -5.33731900 | -2.66991600 | -0.54066900 |
| C           | -2.02743300 | 1.64805000  | 2.31879700  | H | -2.78900300 | -1.56458400 | -3.87601800 |
| C           | -0.77685400 | 0.93880700  | 2.62017400  | H | -3.54770600 | -3.16744800 | -3.84624100 |
| C           | -1.10100400 | -0.43165000 | 2.88145000  | H | -2.24250600 | -2.77479400 | -2.70802000 |
| C           | -2.46165700 | -0.62006500 | 2.45846700  | O | -3.15510500 | 2.47862900  | -0.46366900 |
| C           | -3.05136200 | 0.70644600  | 2.21324500  | H | -3.65826000 | 1.64245000  | -0.75698000 |
| O           | -4.23831600 | 0.30658400  | -1.17738100 | C | 1.02855600  | 3.15158100  | -0.92606600 |
| C           | -1.05157200 | 1.19564000  | -2.00658300 | H | 0.15002800  | 3.69383600  | -0.55520900 |
| C           | 0.86084400  | 1.67933000  | -0.61903800 | H | 0.99466300  | 3.27425900  | -2.02004000 |
| C           | 1.74837900  | 0.84056400  | -0.07321100 | C | 2.30945900  | 3.73000400  | -0.37519800 |
| O           | -1.72090600 | 1.20270100  | -2.96658500 | C | 2.30589800  | 4.46176800  | 0.81794100  |
| C           | 0.36417500  | -1.22201300 | 0.38607300  | C | 3.53398100  | 3.49349800  | -1.01573300 |
| C           | 1.55532500  | -0.61139200 | 0.10011500  | C | 3.49826700  | 4.93887300  | 1.36658500  |
| C           | -4.50132800 | 0.94146700  | 1.93003200  | H | 1.36041000  | 4.66378500  | 1.31521400  |
| C           | -3.22928900 | -1.90502400 | 2.50430000  | C | 4.72792500  | 3.96437900  | -0.46908500 |
| C           | -2.09675200 | 3.13158400  | 2.15564900  | H | 3.54932800  | 2.92252000  | -1.94068300 |
| C           | 0.52600400  | 1.60962000  | 2.93052500  | C | 4.71310500  | 4.68732200  | 0.72686100  |
| C           | -0.22626400 | -1.43603600 | 3.55613500  | H | 3.47702900  | 5.50768000  | 2.29186800  |
| H           | -4.68119500 | 1.97247400  | 1.62424500  | H | 5.66823000  | 3.76682800  | -0.97579100 |
| H           | -5.10432300 | 0.72644300  | 2.82133600  | H | 5.64170400  | 5.05534000  | 1.15344600  |
| H           | -4.85064000 | 0.30117100  | 1.11699400  | H | 2.72516300  | 1.23574100  | 0.16988800  |
| H           | -1.61903900 | 3.45241500  | 1.22587600  | N | 2.69589300  | -1.43405900 | -0.10546400 |
| H           | -1.59177100 | 3.62076700  | 2.99678800  | N | 3.75053300  | -0.79229800 | -0.38916500 |
| H           | -3.12729700 | 3.48306400  | 2.11070200  | N | 4.85661500  | -1.52750400 | -0.56382800 |
| H           | 0.68577800  | 2.47601000  | 2.28665800  | C | 5.95160600  | -0.76024800 | -1.18900500 |
| H           | 1.36477700  | 0.92853300  | 2.77297400  | C | 6.44698700  | 0.33769000  | -0.23856400 |
| H           | 0.54845000  | 1.95065900  | 3.97377700  | H | 7.30275600  | 0.86231500  | -0.67668700 |
| H           | 0.82613000  | -1.27358500 | 3.31777100  | H | 5.65344800  | 1.06675800  | -0.05279600 |
| H           | -0.47968100 | -2.45720500 | 3.27201700  | H | 6.75419100  | -0.08953500 | 0.72049800  |
| H           | -0.34945000 | -1.33939500 | 4.64242800  | C | 5.54424700  | -0.18147500 | -2.55350300 |

|               |             |             |             |   |             |             |             |
|---------------|-------------|-------------|-------------|---|-------------|-------------|-------------|
| H             | 4.72284900  | 0.52926200  | -2.42508800 | C | 0.31361900  | 1.06303000  | -0.44704000 |
| H             | 6.38905200  | 0.34006800  | -3.01560100 | C | 1.51462000  | 0.48562600  | -0.13766000 |
| H             | 5.21049900  | -0.96891000 | -3.23482000 | C | -4.79041300 | -0.66101400 | -1.43037500 |
| H             | 6.76379800  | -1.47486100 | -1.34328300 | C | -3.46910700 | 2.08383300  | -2.20128900 |
| C             | 4.79241400  | -3.00383700 | -0.57875700 | C | -2.63301700 | -3.01208500 | -2.05546600 |
| H             | 4.01776600  | -3.24618000 | 0.15276000  | C | -0.02586100 | -1.64799000 | -3.16685500 |
| C             | 6.10964000  | -3.63186900 | -0.11683100 | C | -0.63070600 | 1.46904500  | -3.61051600 |
| H             | 6.45413200  | -3.18262300 | 0.81953900  | H | -5.02727700 | -1.69973900 | -1.19895600 |
| H             | 5.95861100  | -4.70286500 | 0.05109800  | H | -5.51390800 | -0.29677400 | -2.17012900 |
| H             | 6.90575000  | -3.53234200 | -0.86229900 | H | -4.93027700 | -0.08035500 | -0.51470200 |
| C             | 4.32900400  | -3.53744200 | -1.94162700 | H | -2.04698700 | -3.37889500 | -1.20831500 |
| H             | 3.37861800  | -3.07690900 | -2.22146800 | H | -2.30188900 | -3.53543300 | -2.95950300 |
| H             | 5.07130600  | -3.32697800 | -2.71939200 | H | -3.66920500 | -3.29000400 | -1.85931700 |
| H             | 4.18396900  | -4.62200900 | -1.89655700 | H | 0.13468400  | -2.54887100 | -2.56989800 |
| C             | 0.24947400  | -2.68446800 | 0.57447400  | H | 0.87446200  | -1.03524300 | -3.08976500 |
| C             | -0.81376000 | -3.40386700 | -0.00462500 | H | -0.15321400 | -1.95183700 | -4.21395500 |
| C             | 1.16361500  | -3.40680900 | 1.37278700  | H | 0.42931700  | 1.26485000  | -3.44941400 |
| C             | -0.95028000 | -4.77830800 | 0.19163300  | H | -0.81773000 | 2.50176900  | -3.31678400 |
| H             | -1.52887200 | -2.86016100 | -0.60564900 | H | -0.83716700 | 1.37181500  | -4.68400100 |
| C             | 1.02121700  | -4.77781400 | 1.57487100  | H | -4.09256100 | 2.14448200  | -1.30516400 |
| H             | 1.98689900  | -2.87896400 | 1.83793000  | H | -4.12571400 | 2.21203500  | -3.07171400 |
| C             | -0.03650400 | -5.47515100 | 0.98427800  | H | -2.76279400 | 2.91492100  | -2.17316300 |
| H             | -1.77779800 | -5.30369200 | -0.27862900 | C | -3.24506500 | 0.84678800  | 1.83873200  |
| H             | 1.73804300  | -5.30361600 | 2.20049500  | O | -2.15549600 | 0.85368600  | 1.22713300  |
| H             | -0.14568800 | -6.54451800 | 1.14226200  | C | -3.64662000 | 2.06238200  | 2.68777500  |
| C             | -3.05768100 | 3.45127100  | -1.37095900 | C | -4.63954200 | 1.65164300  | 3.78847300  |
| O             | -2.21946100 | 4.32831700  | -1.24561000 | C | -4.32642100 | 3.06270500  | 1.72173700  |
| C             | -4.05653000 | 3.39324100  | -2.51005900 | C | -2.39394200 | 2.69983800  | 3.31561800  |
| H             | -4.12485300 | 2.37662500  | -2.90449300 | H | -5.54326900 | 1.20948600  | 3.36424700  |
| H             | -5.04726500 | 3.66589200  | -2.13018200 | H | -4.92174800 | 2.53008600  | 4.37862300  |
| H             | -3.76504800 | 4.09224200  | -3.29357300 | H | -4.19256500 | 0.91629800  | 4.46468100  |
| <b>TS15II</b> |             |             |             | H | -3.64554400 | 3.37800800  | 0.92581100  |
| Rh            | -1.38285200 | -0.06238900 | -0.72852000 | H | -4.63921800 | 3.95511200  | 2.27393700  |
| N             | -0.48834500 | -1.60318600 | 0.46501300  | H | -5.21613700 | 2.61980600  | 1.26130000  |
| C             | -2.47856200 | -1.53675800 | -2.22964000 | H | -1.89255100 | 1.99433900  | 3.98575600  |
| C             | -1.22856600 | -0.90053300 | -2.67680300 | H | -2.68310200 | 3.57838100  | 3.90192900  |
| C             | -1.49413800 | 0.50623100  | -2.86327600 | H | -1.67289800 | 3.00917700  | 2.55775300  |
| C             | -2.76144900 | 0.76584300  | -2.26781300 | O | -3.06696000 | -2.10589400 | 0.90907800  |
| C             | -3.39550600 | -0.52569900 | -1.95305700 | H | -3.67239000 | -1.04034300 | 1.34079800  |
| O             | -4.11119600 | -0.11294200 | 1.78365500  | C | 1.25376600  | -3.39380300 | 0.38754900  |
| C             | -1.04115100 | -2.09211500 | 1.49473800  | H | 0.66379600  | -3.94594700 | -0.35719000 |
| C             | 0.90028200  | -1.92015900 | 0.27938100  | H | 0.92342800  | -3.77387300 | 1.36325200  |
| C             | 1.77048400  | -0.95086800 | -0.03194400 | C | 2.72906900  | -3.66136000 | 0.20527700  |
| O             | -1.10915400 | -2.53975900 | 2.57571600  | C | 3.25673700  | -3.92662600 | -1.06377400 |

|   |             |             |             |
|---|-------------|-------------|-------------|
| C | 3.60809900  | -3.55813200 | 1.29146900  |
| C | 4.63211100  | -4.08195600 | -1.24732300 |
| H | 2.58367100  | -4.00066100 | -1.91455600 |
| C | 4.98330000  | -3.71143900 | 1.11315000  |
| H | 3.20885500  | -3.34099400 | 2.27893600  |
| C | 5.49982800  | -3.97064500 | -0.15897000 |
| H | 5.02557800  | -4.28664300 | -2.23904100 |
| H | 5.65144200  | -3.62329300 | 1.96496800  |
| H | 6.57050200  | -4.08647700 | -0.30018100 |
| H | 2.80125600  | -1.24577700 | -0.16884100 |
| N | 2.61902700  | 1.35395600  | 0.10141400  |
| N | 3.72717100  | 0.76126800  | 0.25038200  |
| N | 4.79274300  | 1.54443500  | 0.45540000  |
| C | 5.97263100  | 0.78958200  | 0.92162600  |
| C | 6.49448500  | -0.12844400 | -0.19155900 |
| H | 7.40791400  | -0.63869700 | 0.13195800  |
| H | 5.74741900  | -0.88798300 | -0.43628300 |
| H | 6.71702000  | 0.44659900  | -1.09535500 |
| C | 5.68310000  | 0.00177900  | 2.20932800  |
| H | 4.93768000  | -0.77361200 | 2.01362300  |
| H | 6.59724100  | -0.48038100 | 2.57218400  |
| H | 5.30270200  | 0.65768900  | 2.99745500  |
| H | 6.73528400  | 1.54188600  | 1.13858000  |
| C | 4.64368900  | 3.00129300  | 0.65032700  |
| H | 3.77942200  | 3.26760400  | 0.03761000  |
| C | 5.86230900  | 3.76784500  | 0.12989100  |
| H | 6.11098800  | 3.46351500  | -0.89126400 |
| H | 5.63960100  | 4.83962200  | 0.12469800  |
| H | 6.74808200  | 3.62541800  | 0.75811000  |
| C | 4.30751100  | 3.34042800  | 2.10909300  |
| H | 3.42056700  | 2.78684600  | 2.42750800  |
| H | 5.14091300  | 3.08956400  | 2.77485200  |
| H | 4.10114700  | 4.41086900  | 2.21489700  |
| C | 0.20109000  | 2.51748500  | -0.69697900 |
| C | -0.88043800 | 3.26733000  | -0.19836600 |
| C | 1.13761400  | 3.20078600  | -1.50541700 |
| C | -1.01274500 | 4.62955500  | -0.46931400 |
| H | -1.61322200 | 2.75698400  | 0.40822500  |
| C | 1.00289400  | 4.55890600  | -1.78364800 |
| H | 1.96967500  | 2.64883000  | -1.92542800 |
| C | -0.07273800 | 5.28630900  | -1.26525100 |
| H | -1.85613700 | 5.17682900  | -0.05514100 |
| H | 1.73800400  | 5.05078000  | -2.41551600 |
| H | -0.17614800 | 6.34577500  | -1.48211200 |

|   |             |             |            |
|---|-------------|-------------|------------|
| C | -3.58140400 | -3.31352200 | 1.09670600 |
| O | -2.95702700 | -4.33903400 | 0.87210600 |
| C | -5.01648600 | -3.31556600 | 1.60298900 |
| H | -5.06449100 | -2.80159800 | 2.56846100 |
| H | -5.66369000 | -2.76021300 | 0.91622700 |
| H | -5.37611600 | -4.33927800 | 1.70659900 |

#### 16II

|    |             |             |             |
|----|-------------|-------------|-------------|
| Rh | -1.49669500 | 0.01117300  | -0.80251300 |
| N  | -0.45248900 | -1.70179500 | -0.19115700 |
| C  | -2.95379500 | -1.16949600 | -2.19821400 |
| C  | -1.90701200 | -0.35950300 | -2.83797900 |
| C  | -2.26018400 | 1.03667400  | -2.65052400 |
| C  | -3.31527300 | 1.07143400  | -1.70958500 |
| C  | -3.77865800 | -0.30464400 | -1.47805700 |
| O  | -3.33907900 | -0.53950300 | 2.51003300  |
| C  | -0.90264300 | -2.49675200 | 0.78050300  |
| C  | 0.88955000  | -1.90056700 | -0.56989900 |
| C  | 1.73259100  | -0.86956000 | -0.75869600 |
| O  | -0.33381200 | -3.23289600 | 1.56116400  |
| C  | 0.21060600  | 1.12113500  | -0.68079900 |
| C  | 1.44899800  | 0.54534700  | -0.58055500 |
| C  | -4.95976500 | -0.64925900 | -0.62428400 |
| C  | -4.01672300 | 2.28633700  | -1.18448400 |
| C  | -3.02083300 | -2.65948300 | -2.30851700 |
| C  | -0.88829000 | -0.89546800 | -3.79721100 |
| C  | -1.66234600 | 2.19727100  | -3.37774400 |
| H  | -5.14055600 | -1.72546000 | -0.61279900 |
| H  | -5.86674600 | -0.16122200 | -1.00092500 |
| H  | -4.82003200 | -0.31825700 | 0.41019800  |
| H  | -2.13696400 | -3.12787100 | -1.86848000 |
| H  | -3.07104100 | -2.95649900 | -3.36233300 |
| H  | -3.89445000 | -3.07095800 | -1.80097300 |
| H  | -0.50806700 | -1.86047200 | -3.45354200 |
| H  | -0.03814400 | -0.21579300 | -3.88288200 |
| H  | -1.32276500 | -1.03504500 | -4.79590900 |
| H  | -0.60756700 | 2.02999100  | -3.60052400 |
| H  | -1.73388400 | 3.12263700  | -2.80495800 |
| H  | -2.19204300 | 2.33703100  | -4.32894600 |
| H  | -4.35735900 | 2.12681100  | -0.15763100 |
| H  | -4.90200300 | 2.51452000  | -1.79260400 |
| H  | -3.36114300 | 3.15843100  | -1.18970900 |
| C  | -2.55384500 | 0.52753000  | 2.41459800  |
| O  | -1.71675600 | 0.65600200  | 1.52411700  |
| C  | -2.81042000 | 1.60818200  | 3.46435400  |

|   |             |             |             |             |             |             |             |
|---|-------------|-------------|-------------|-------------|-------------|-------------|-------------|
| C | -3.40700800 | 1.00647400  | 4.74860800  | C           | 5.85187500  | 3.74211300  | 0.05216500  |
| C | -3.81853900 | 2.59807900  | 2.83036500  | H           | 6.22901400  | 3.43260000  | -0.92725100 |
| C | -1.48670000 | 2.33148900  | 3.77415000  | H           | 5.65342900  | 4.81820400  | 0.02004900  |
| H | -4.36038600 | 0.50981100  | 4.55454800  | H           | 6.64210500  | 3.58173100  | 0.79323100  |
| H | -3.57331800 | 1.80228900  | 5.48168300  | C           | 4.05172600  | 3.33678200  | 1.81421500  |
| H | -2.72773400 | 0.27194500  | 5.19164500  | H           | 3.11899400  | 2.80347000  | 2.01303600  |
| H | -3.40944300 | 3.05735800  | 1.92609600  | H           | 4.79027600  | 3.05912500  | 2.57438800  |
| H | -4.04422300 | 3.39606000  | 3.54489100  | H           | 3.85956200  | 4.41147400  | 1.90493600  |
| H | -4.75783900 | 2.09681800  | 2.57354700  | C           | 0.05798200  | 2.59056400  | -0.73820500 |
| H | -0.75944900 | 1.64288800  | 4.21513500  | C           | -0.91380100 | 3.27819600  | 0.01269300  |
| H | -1.67093400 | 3.13856000  | 4.49039500  | C           | 0.85010300  | 3.35994500  | -1.61967500 |
| H | -1.04095000 | 2.75752600  | 2.87387300  | C           | -1.08523500 | 4.65864700  | -0.10249700 |
| O | -2.37654900 | -2.42555200 | 0.92012300  | H           | -1.53070800 | 2.70993200  | 0.69323500  |
| H | -3.01595800 | -1.21547900 | 1.85445700  | C           | 0.67960300  | 4.73683300  | -1.73828100 |
| C | 1.34817000  | -3.33019100 | -0.87345300 | H           | 1.59980600  | 2.85607100  | -2.21896600 |
| H | 1.29658000  | -3.48793600 | -1.95914700 | C           | -0.29204300 | 5.39884900  | -0.98117100 |
| H | 0.66110500  | -4.04550000 | -0.41768900 | H           | -1.84101100 | 5.15618000  | 0.50091900  |
| C | 2.75612200  | -3.59108000 | -0.38099200 | H           | 1.30220300  | 5.29595700  | -2.43209200 |
| C | 3.83224600  | -3.70962200 | -1.26584000 | H           | -0.42679500 | 6.47267200  | -1.07541900 |
| C | 3.00553800  | -3.64897200 | 0.99900100  | C           | -3.02767800 | -3.64022000 | 0.86838000  |
| C | 5.13648800  | -3.87779700 | -0.78889900 | O           | -2.60489400 | -4.58155000 | 0.24948600  |
| H | 3.65062600  | -3.66118600 | -2.33711700 | C           | -4.30264500 | -3.61330600 | 1.67289500  |
| C | 4.30375400  | -3.81812600 | 1.47633000  | H           | -4.04110900 | -3.62692300 | 2.73641500  |
| H | 2.16754700  | -3.54505700 | 1.68210000  | H           | -4.87377900 | -2.70034800 | 1.49051100  |
| C | 5.37587300  | -3.92956600 | 0.58400700  | H           | -4.90081900 | -4.49208100 | 1.43404300  |
| H | 5.96170600  | -3.96399000 | -1.49073400 |             |             |             |             |
| H | 4.48298200  | -3.85941700 | 2.54743400  | <b>17II</b> |             |             |             |
| H | 6.38821900  | -4.05495300 | 0.95804700  | C           | 1.74438700  | -2.50222600 | -1.83432400 |
| H | 2.75163500  | -1.10997000 | -1.03227000 | C           | 2.49866400  | -1.32143400 | -2.16454600 |
| N | 2.54354900  | 1.40951500  | -0.29145300 | C           | 3.63868800  | -1.22716400 | -1.25221100 |
| N | 3.62828600  | 0.78985300  | -0.07815400 | C           | 3.47178600  | -2.22942200 | -0.28414300 |
| N | 4.69294400  | 1.54383500  | 0.20843200  | C           | 2.28535800  | -3.02178800 | -0.61063400 |
| C | 5.81344700  | 0.75062800  | 0.75695800  | Rh          | 1.49497700  | -0.99869400 | -0.25930400 |
| C | 6.38549400  | -0.17949900 | -0.32048500 | C           | 4.77247600  | -0.25635100 | -1.37385100 |
| H | 7.25488400  | -0.72051300 | 0.06762900  | C           | 2.27982400  | -0.44457600 | -3.35855800 |
| H | 5.63495100  | -0.91470200 | -0.62137300 | H           | 2.86676000  | -0.80983600 | -4.21095100 |
| H | 6.69337400  | 0.39071600  | -1.20232700 | H           | 1.22618300  | -0.43172100 | -3.64511800 |
| C | 5.40022300  | -0.03414500 | 2.01233500  | H           | 2.58237900  | 0.58447500  | -3.15116300 |
| H | 4.64330900  | -0.77987300 | 1.75540800  | C           | 0.63920900  | -3.08337400 | -2.65937100 |
| H | 6.26636600  | -0.55370200 | 2.43594500  | C           | 1.90846000  | -4.30043200 | 0.07308400  |
| H | 4.98842200  | 0.63128900  | 2.77675400  | H           | 0.87026400  | -4.57211300 | -0.12142600 |
| H | 6.58133000  | 1.47736900  | 1.03383200  | H           | 2.55233800  | -5.12059800 | -0.27106900 |
| C | 4.55946800  | 3.00167800  | 0.40437500  | H           | 2.02193700  | -4.21498400 | 1.15627600  |
| H | 3.78420300  | 3.29751900  | -0.30705200 | C           | 4.29513900  | -2.46344500 | 0.94373900  |
|   |             |             |             | H           | 3.66428300  | -2.37902000 | 1.83514000  |

|   |             |             |             |               |             |             |             |
|---|-------------|-------------|-------------|---------------|-------------|-------------|-------------|
| H | 4.72903000  | -3.46989000 | 0.93472800  | N             | -2.78415100 | -0.69762600 | -0.50145400 |
| H | 5.10675100  | -1.73918900 | 1.03212100  | N             | -3.54195300 | 0.30142800  | -0.67058000 |
| C | -1.97056400 | 4.92780200  | 0.51637300  | N             | -4.84813400 | 0.07399300  | -0.46639300 |
| C | -1.64054700 | 4.04979300  | -0.51391400 | C             | -5.61915300 | 1.32238900  | -0.30507800 |
| C | -0.31681400 | 3.93591800  | -0.96389400 | H             | -6.64608400 | 1.01287300  | -0.09744600 |
| C | 0.67448400  | 4.70921500  | -0.35104900 | C             | -5.11198600 | 2.16413000  | 0.87759000  |
| C | 0.34713500  | 5.58077000  | 0.69182300  | H             | -4.07624600 | 2.47049600  | 0.70576600  |
| C | -0.97356500 | 5.69723900  | 1.12508500  | H             | -5.14705000 | 1.59592200  | 1.81129000  |
| H | -3.00254100 | 5.00619100  | 0.84871400  | C             | -5.61551500 | 2.12479400  | -1.61246600 |
| H | -2.40962700 | 3.42755700  | -0.96466100 | H             | -4.59679500 | 2.42887300  | -1.86709700 |
| H | 1.70786600  | 4.60907900  | -0.66354700 | H             | -6.01041800 | 1.52411200  | -2.43715500 |
| H | 1.13367100  | 6.15966000  | 1.16745500  | C             | -5.30921400 | -1.23755300 | 0.03571000  |
| H | -1.22658900 | 6.37683200  | 1.93443300  | H             | -4.67545700 | -1.95977200 | -0.48639900 |
| C | 0.02739700  | 2.91515500  | -2.04203800 | C             | -5.05392900 | -1.40650800 | 1.54110600  |
| H | -0.75010200 | 2.91791000  | -2.81151100 | H             | -4.00187000 | -1.22190600 | 1.76839700  |
| H | 0.97408500  | 3.16782700  | -2.51661600 | H             | -5.29351800 | -2.42938700 | 1.85148800  |
| C | 0.05381500  | 1.52704200  | -1.41599100 | H             | -5.67615600 | -0.72002200 | 2.12567200  |
| C | -1.06409400 | 0.77128500  | -1.48483500 | C             | -6.76665100 | -1.50867400 | -0.34421300 |
| H | -1.87506900 | 1.16591100  | -2.08496100 | H             | -6.94232900 | -1.31318900 | -1.40650600 |
| C | 2.30571700  | 1.79508200  | -0.61685100 | H             | -6.99955500 | -2.55963200 | -0.14571300 |
| N | 1.09510900  | 1.17646600  | -0.51895500 | H             | -7.47081400 | -0.90724900 | 0.24051400  |
| O | 2.82164200  | 2.42665200  | -1.51827200 | H             | -6.22994300 | 3.02506400  | -1.50918100 |
| C | 3.61773000  | 2.53811400  | 1.26953600  | H             | -5.72717300 | 3.06229800  | 0.99807100  |
| O | 3.39043200  | 3.70575500  | 1.08298100  | C             | 0.98881800  | 0.25641700  | 2.56380700  |
| O | 3.06503900  | 1.50997700  | 0.55512100  | O             | 1.52904300  | -0.68162000 | 1.94653100  |
| H | 5.26122000  | -0.09213800 | -0.41138600 | O             | 0.43105000  | 1.28723400  | 2.00357100  |
| H | 5.52457200  | -0.64215200 | -2.07394300 | H             | 0.59886200  | 1.25724600  | 0.97915800  |
| H | 4.44258400  | 0.71546600  | -1.74505300 | C             | 0.91377600  | 0.23692200  | 4.06756300  |
| H | -0.02634500 | -2.29931500 | -3.02745200 | H             | 1.09251200  | 1.23579300  | 4.47091800  |
| H | 1.05602600  | -3.61709800 | -3.52235100 | H             | -0.09940200 | -0.06383500 | 4.35605700  |
| H | 0.04011100  | -3.78477800 | -2.07913900 | H             | 1.62585600  | -0.48277600 | 4.47143700  |
| C | -1.40226600 | -0.42713100 | -0.72296900 | C             | 4.52656200  | 1.96689700  | 2.33152100  |
| C | -0.52331600 | -1.30404300 | -0.15970600 | H             | 5.41161700  | 1.53461200  | 1.85308500  |
| C | -0.98538800 | -2.56188200 | 0.46953800  | H             | 4.83026500  | 2.75732500  | 3.01714500  |
| C | -1.81334900 | -3.45161700 | -0.25148700 | H             | 4.02006200  | 1.16014700  | 2.86836200  |
| C | -0.60123200 | -2.95112500 | 1.76661400  |               |             |             |             |
| C | -2.22888600 | -4.66378200 | 0.29362400  | <b>TS18II</b> |             |             |             |
| H | -2.13818500 | -3.16685200 | -1.24541200 | C             | 1.53358900  | -2.70137400 | -1.79265800 |
| C | -1.02780100 | -4.16031300 | 2.31809800  | C             | 2.39554600  | -1.60416600 | -2.12318700 |
| H | 0.05275200  | -2.30619000 | 2.33761800  | C             | 3.50752500  | -1.57962800 | -1.16786500 |
| C | -1.83945600 | -5.02768100 | 1.58648300  | C             | 3.22748300  | -2.53916000 | -0.18458200 |
| H | -2.86211100 | -5.32588700 | -0.29145200 | C             | 1.98235900  | -3.22859800 | -0.53137300 |
| H | -0.71662300 | -4.42717000 | 3.32500100  | Rh            | 1.36532600  | -1.15718500 | -0.23590700 |
| H | -2.16392300 | -5.97223100 | 2.01379600  | C             | 4.72538500  | -0.71585800 | -1.27809000 |
|   |             |             |             | C             | 2.29904500  | -0.74513400 | -3.34557700 |



|   |             |             |             |   |             |             |             |
|---|-------------|-------------|-------------|---|-------------|-------------|-------------|
| H | 2.92940500  | -1.15214300 | -4.14663100 | C | -2.16398600 | -3.28587600 | -0.31457400 |
| H | 1.27069400  | -0.69670200 | -3.70910600 | C | -0.95822900 | -2.89981200 | 1.73388400  |
| H | 2.63145500  | 0.27363800  | -3.13507800 | C | -2.71091900 | -4.44929800 | 0.22139900  |
| C | 0.40765700  | -3.21455800 | -2.63513000 | H | -2.43380400 | -2.97297300 | -1.31672100 |
| C | 1.48129300  | -4.45659900 | 0.16332700  | C | -1.51761900 | -4.05810200 | 2.27570600  |
| H | 0.43244000  | -4.65112700 | -0.06233700 | H | -0.25233800 | -2.32129400 | 2.31469400  |
| H | 2.07058700  | -5.33074700 | -0.14391400 | C | -2.39272600 | -4.84365300 | 1.52466900  |
| H | 1.56712700  | -4.35605800 | 1.24750900  | H | -3.39140700 | -5.04803700 | -0.37866600 |
| C | 3.98633700  | -2.81004000 | 1.07675000  | H | -1.25970500 | -4.35101000 | 3.29037600  |
| H | 3.34212400  | -2.62249000 | 1.94267700  | H | -2.82036400 | -5.74939900 | 1.94521500  |
| H | 4.31255900  | -3.85543500 | 1.11830900  | N | -2.86797200 | -0.44217300 | -0.52729500 |
| H | 4.86708500  | -2.17130500 | 1.16358600  | N | -3.51831400 | 0.63298000  | -0.67649300 |
| C | -1.24257400 | 5.12996900  | 0.65516100  | N | -4.84256400 | 0.53746200  | -0.48542100 |
| C | -1.09688800 | 4.20362000  | -0.37500500 | C | -5.48237400 | 1.85504100  | -0.30473900 |
| C | 0.15973500  | 3.96377400  | -0.95012600 | H | -6.54143600 | 1.65092700  | -0.13053700 |
| C | 1.27163600  | 4.65768200  | -0.46224700 | C | -4.92095000 | 2.60635500  | 0.91388600  |
| C | 1.12902600  | 5.57809300  | 0.58058400  | H | -3.85338100 | 2.80111500  | 0.77627700  |
| C | -0.12615100 | 5.82088400  | 1.13796400  | H | -5.04301000 | 2.02226800  | 1.83017500  |
| H | -2.22405200 | 5.30674600  | 1.08743300  | C | -5.36083300 | 2.68832500  | -1.58700500 |
| H | -1.95747600 | 3.63972400  | -0.72718600 | H | -4.31038900 | 2.89872900  | -1.80450600 |
| H | 2.25583000  | 4.45831000  | -0.87182000 | H | -5.78670200 | 2.15103600  | -2.43951800 |
| H | 2.00666700  | 6.09521200  | 0.95783400  | C | -5.44114000 | -0.73077400 | -0.01750700 |
| H | -0.23638900 | 6.53716800  | 1.94764200  | H | -4.88356100 | -1.50214900 | -0.55618600 |
| C | 0.30119400  | 2.89832400  | -2.03023500 | C | -5.21338600 | -0.96400800 | 1.48384700  |
| H | -0.50164900 | 3.00713600  | -2.76554800 | H | -4.15029200 | -0.88752100 | 1.72122800  |
| H | 1.25086300  | 3.01225600  | -2.55222600 | H | -5.55199500 | -1.96716300 | 1.76461300  |
| C | 0.15997500  | 1.52617200  | -1.39402100 | H | -5.77090500 | -0.23716500 | 2.08461600  |
| C | -1.01274700 | 0.87068000  | -1.47908400 | C | -6.91675400 | -0.83752900 | -0.40842400 |
| H | -1.77464100 | 1.32963300  | -2.09831500 | H | -7.06548000 | -0.59424700 | -1.46496300 |
| C | 2.43373800  | 1.56269500  | -0.57562000 | H | -7.25840100 | -1.86373800 | -0.24086400 |
| N | 1.14564100  | 1.09737400  | -0.44849200 | H | -7.55721500 | -0.18313300 | 0.19234300  |
| O | 3.00758700  | 2.01305000  | -1.54460200 | H | -5.88866200 | 3.64084400  | -1.47383500 |
| C | 3.93231200  | 2.31932500  | 1.16532400  | H | -5.43712900 | 3.56348200  | 1.04451300  |
| O | 4.02091100  | 3.44312900  | 0.74843600  | C | 0.88552300  | 0.14898200  | 2.51074500  |
| O | 3.11477600  | 1.34501100  | 0.63634400  | O | 1.35800300  | -0.86107200 | 1.91397100  |
| H | 5.22390500  | -0.60259000 | -0.31288600 | O | 0.46843200  | 1.20992700  | 1.94174900  |
| H | 5.44267400  | -1.16818000 | -1.97490600 | H | 0.73943400  | 1.17578500  | 0.77012800  |
| H | 4.48858300  | 0.28174000  | -1.65178500 | C | 0.76688900  | 0.08051100  | 4.01621500  |
| H | -0.17114200 | -2.39190100 | -3.06093000 | H | 0.78589400  | 1.08118500  | 4.45034600  |
| H | 0.80187200  | -3.82224000 | -3.45886100 | H | -0.19532300 | -0.38388200 | 4.26047300  |
| H | -0.27315800 | -3.83171400 | -2.04912900 | H | 1.55942200  | -0.54412800 | 4.43228300  |
| C | -1.46488000 | -0.30469500 | -0.73583800 | C | 4.64557000  | 1.74968100  | 2.36567400  |
| C | -0.67740200 | -1.27280000 | -0.18885600 | H | 5.22103400  | 0.86666100  | 2.07262600  |
| C | -1.27150900 | -2.48102200 | 0.42724500  | H | 5.30228600  | 2.50659600  | 2.79285500  |

|            |             |             |             |   |             |             |             |
|------------|-------------|-------------|-------------|---|-------------|-------------|-------------|
| H          | 3.90867000  | 1.42716400  | 3.10738700  | O | 3.03078800  | 1.45271400  | 0.73186300  |
| <b>19H</b> |             |             |             | H | 5.09859800  | -0.42552000 | -0.25463600 |
| C          | 1.56613600  | -2.67603000 | -1.86209400 | H | 5.53532200  | -1.15157800 | -1.81005000 |
| C          | 2.42476700  | -1.57471700 | -2.16839300 | H | 4.50780000  | 0.28564500  | -1.75250300 |
| C          | 3.52359100  | -1.55069700 | -1.19551200 | H | -0.11930000 | -2.36001500 | -3.15637300 |
| C          | 3.25061600  | -2.53528200 | -0.23600600 | H | 0.83464700  | -3.81162800 | -3.52058500 |
| C          | 2.00844400  | -3.22099700 | -0.60122600 | H | -0.25449400 | -3.78107700 | -2.12241600 |
| Rh         | 1.38276700  | -1.17606900 | -0.25875700 | C | -1.45896900 | -0.33402100 | -0.72552500 |
| C          | 4.72661500  | -0.65955400 | -1.25496400 | C | -0.65924500 | -1.30215400 | -0.19581600 |
| C          | 2.33229300  | -0.69350100 | -3.37537000 | C | -1.24387300 | -2.52024400 | 0.40843700  |
| H          | 3.00261200  | -1.05817300 | -4.16412100 | C | -2.13907500 | -3.31683700 | -0.33827200 |
| H          | 1.31516400  | -0.67708300 | -3.77171600 | C | -0.91144400 | -2.95777800 | 1.70376300  |
| H          | 2.61908500  | 0.33238000  | -3.13448100 | C | -2.67329900 | -4.49249200 | 0.18415600  |
| C          | 0.44242800  | -3.18406500 | -2.71090200 | H | -2.42104100 | -2.98889500 | -1.33243100 |
| C          | 1.51063400  | -4.46447900 | 0.06667900  | C | -1.45993600 | -4.12710900 | 2.23221500  |
| H          | 0.46145600  | -4.65592600 | -0.16013500 | H | -0.19597900 | -2.38644400 | 2.27974600  |
| H          | 2.10109500  | -5.32934100 | -0.26379200 | C | -2.33924900 | -4.90499300 | 1.47765400  |
| H          | 1.60141500  | -4.38756500 | 1.15214900  | H | -3.35628100 | -5.08585800 | -0.41837300 |
| C          | 4.00217100  | -2.81913800 | 1.02620200  | H | -1.18917300 | -4.43574400 | 3.23880500  |
| H          | 3.37079300  | -2.57406900 | 1.88814300  | H | -2.75742200 | -5.81978700 | 1.88810100  |
| H          | 4.26967500  | -3.87961800 | 1.08966600  | N | -2.85908300 | -0.46916500 | -0.50269700 |
| H          | 4.91768500  | -2.22838900 | 1.09186900  | N | -3.50628800 | 0.60874900  | -0.64833300 |
| C          | -1.25363200 | 5.14878100  | 0.57840500  | N | -4.82929900 | 0.52073700  | -0.44530500 |
| C          | -1.10670000 | 4.18834400  | -0.41941300 | C | -5.46049700 | 1.84203800  | -0.26106000 |
| C          | 0.13979900  | 3.97199200  | -1.02543800 | H | -6.51959400 | 1.64360200  | -0.08071800 |
| C          | 1.24002800  | 4.72237400  | -0.60091500 | C | -4.88829000 | 2.59116400  | 0.95384000  |
| C          | 1.09699000  | 5.67777200  | 0.41010700  | H | -3.82015900 | 2.77895200  | 0.81131700  |
| C          | -0.14840800 | 5.89734600  | 0.99752600  | H | -5.00896200 | 2.00932000  | 1.87157100  |
| H          | -2.22636000 | 5.30638600  | 1.03670400  | C | -5.34289900 | 2.67418500  | -1.54451900 |
| H          | -1.95587700 | 3.57910900  | -0.71980100 | H | -4.29314600 | 2.88190000  | -1.76796000 |
| H          | 2.21729500  | 4.53915700  | -1.03398500 | H | -5.77498900 | 2.13783500  | -2.39449400 |
| H          | 1.96683600  | 6.23764600  | 0.74090500  | C | -5.42918200 | -0.74280100 | 0.03383900  |
| H          | -0.25928600 | 6.63938100  | 1.78344700  | H | -4.88054800 | -1.51900600 | -0.50713500 |
| C          | 0.28654800  | 2.87393300  | -2.07195400 | C | -5.18834900 | -0.97077300 | 1.53391100  |
| H          | -0.50703200 | 2.96178800  | -2.82026400 | H | -4.12310000 | -0.89628800 | 1.76208700  |
| H          | 1.24196800  | 2.97008200  | -2.58821700 | H | -5.52772300 | -1.97171600 | 1.82155200  |
| C          | 0.13338800  | 1.52364100  | -1.40225500 | H | -5.73837900 | -0.24011600 | 2.13686500  |
| C          | -1.02024600 | 0.84142400  | -1.48052400 | C | -6.90889200 | -0.84387800 | -0.34293500 |
| H          | -1.78241700 | 1.27072000  | -2.12156900 | H | -7.06630900 | -0.60445400 | -1.39911600 |
| C          | 2.41497100  | 1.60457500  | -0.50747000 | H | -7.25394000 | -1.86762400 | -0.16759400 |
| N          | 1.11460800  | 1.12811400  | -0.41910700 | H | -7.54045000 | -0.18375100 | 0.26095900  |
| O          | 2.99778000  | 2.00685700  | -1.48686300 | H | -5.86719300 | 3.62835000  | -1.42896500 |
| C          | 3.70226300  | 2.51183500  | 1.31985600  | H | -5.39781700 | 3.55170800  | 1.08566700  |
| O          | 3.84439700  | 3.59169800  | 0.81553400  | C | 0.98047500  | 0.01200700  | 2.55682400  |

|             |             |             |             |   |             |             |             |
|-------------|-------------|-------------|-------------|---|-------------|-------------|-------------|
| O           | 1.44089600  | -0.96654700 | 1.86068600  | H | 1.92358900  | -3.23675800 | -1.68157400 |
| O           | 0.47738900  | 1.06398500  | 2.10770600  | H | 1.10634800  | -3.97150700 | -0.30373300 |
| H           | 0.75124100  | 1.15220900  | 0.60271600  | C | 1.22307800  | -1.83845200 | -0.23732200 |
| C           | 1.05775000  | -0.19281800 | 4.06192300  | C | 1.13595800  | -0.78671000 | -1.06106000 |
| H           | 0.90589100  | 0.75290200  | 4.58424700  | H | 1.53538500  | -0.90535600 | -2.06681900 |
| H           | 0.26896100  | -0.89160200 | 4.36209600  | C | -0.42035200 | -1.69720300 | 1.51362400  |
| H           | 2.01647900  | -0.63866700 | 4.33825500  | N | 0.86678000  | -1.67579100 | 1.15144300  |
| C           | 4.14738000  | 2.08373800  | 2.69234100  | O | -1.34256900 | -2.14376600 | 0.83246400  |
| H           | 4.65506700  | 1.11692400  | 2.64650300  | C | -0.02959600 | -0.16515100 | 3.37123600  |
| H           | 4.79774800  | 2.84517100  | 3.12117800  | O | 1.16558500  | -0.02021100 | 3.24668900  |
| H           | 3.25545900  | 1.95845500  | 3.31494100  | O | -0.75076100 | -1.17197000 | 2.75165600  |
| <b>20II</b> |             |             |             | H | -4.70908600 | -2.82106000 | -0.20828800 |
| C           | -1.99316400 | -0.39541500 | -2.72115500 | H | -4.79314700 | -3.56898600 | -1.83169000 |
| C           | -2.20253800 | -1.72436600 | -2.27627200 | H | -3.35620700 | -3.77062100 | -0.81536200 |
| C           | -3.54513600 | -1.82227500 | -1.68470000 | H | -0.10290500 | -0.60127100 | -3.73445200 |
| C           | -4.12093300 | -0.54732500 | -1.71985300 | H | -1.26931600 | 0.45401600  | -4.53883600 |
| C           | -3.12973300 | 0.38273000  | -2.26847400 | H | -0.41078300 | 1.01539300  | -3.09230500 |
| Rh          | -2.17203100 | -0.36556800 | -0.50271800 | C | 0.70036900  | 0.56927700  | -0.65226500 |
| C           | -4.14038100 | -3.06771600 | -1.10582900 | C | -0.54949600 | 0.88549100  | -0.19096900 |
| C           | -1.29233900 | -2.89965800 | -2.44185100 | C | -0.75831100 | 2.17177200  | 0.50892600  |
| H           | -1.76030500 | -3.65419100 | -3.08485800 | C | -1.91090000 | 2.95870500  | 0.32934100  |
| H           | -0.33597400 | -2.61279600 | -2.88002900 | C | 0.17966900  | 2.61585100  | 1.46639900  |
| H           | -1.09431000 | -3.35562000 | -1.46823500 | C | -2.09413700 | 4.15159700  | 1.02418300  |
| C           | -0.87833100 | 0.14630500  | -3.56153000 | H | -2.68078800 | 2.61169000  | -0.34432400 |
| C           | -3.40790700 | 1.79394400  | -2.68648400 | C | -0.00932300 | 3.80018500  | 2.17715100  |
| H           | -2.49613500 | 2.39521500  | -2.68559000 | H | 1.05051100  | 2.00576200  | 1.67105800  |
| H           | -3.82167500 | 1.80635000  | -3.70399700 | C | -1.14344400 | 4.58308700  | 1.95297700  |
| H           | -4.13756800 | 2.27236300  | -2.02939300 | H | -2.99227400 | 4.73932900  | 0.85262500  |
| C           | -5.48209900 | -0.13963800 | -1.25534300 | H | 0.73117600  | 4.10709800  | 2.91137000  |
| H           | -5.43042600 | 0.78821700  | -0.67915600 | H | -1.29297900 | 5.50701200  | 2.50478500  |
| H           | -6.13323600 | 0.03783100  | -2.12126100 | N | 1.66660600  | 1.59733600  | -0.78893500 |
| H           | -5.92571900 | -0.89748300 | -0.61271000 | N | 2.86062700  | 1.18526900  | -0.92184500 |
| C           | 5.34122700  | -2.57972400 | 0.72884500  | N | 3.76905300  | 2.14236400  | -1.18481800 |
| C           | 4.09382900  | -2.37355000 | 0.13972500  | C | 5.16029700  | 1.70634100  | -0.97293100 |
| C           | 3.15089200  | -3.40933800 | 0.08359400  | H | 5.77562000  | 2.58675100  | -1.17429400 |
| C           | 3.47759900  | -4.65046400 | 0.63922800  | C | 5.41580400  | 1.27086200  | 0.47957700  |
| C           | 4.72607200  | -4.85918300 | 1.23012400  | H | 4.79440300  | 0.41080300  | 0.73925700  |
| C           | 5.66243400  | -3.82482300 | 1.27524800  | H | 5.18096500  | 2.07759500  | 1.17914300  |
| H           | 6.05894600  | -1.76512700 | 0.76413200  | C | 5.54967500  | 0.61852300  | -1.98224400 |
| H           | 3.83320400  | -1.40076900 | -0.26773300 | H | 4.93578500  | -0.27447400 | -1.84578600 |
| H           | 2.75044500  | -5.45850300 | 0.61086700  | H | 5.40868700  | 0.97739400  | -3.00604500 |
| H           | 4.96399600  | -5.82842600 | 1.65959700  | C | 3.38660200  | 3.56806900  | -1.22546700 |
| H           | 6.63214100  | -3.98584000 | 1.73751100  | H | 2.35499000  | 3.55643000  | -1.58554200 |
| C           | 1.80563900  | -3.17762000 | -0.59261100 | C | 3.38541500  | 4.20829200  | 0.16973100  |

|              |             |             |             |   |             |             |             |
|--------------|-------------|-------------|-------------|---|-------------|-------------|-------------|
| H            | 2.73925800  | 3.64364900  | 0.84415000  | C | 3.46359300  | -2.83772300 | -1.53913500 |
| H            | 3.00346600  | 5.23344400  | 0.11532500  | C | 3.93970200  | -4.15242000 | -1.54778500 |
| H            | 4.39752300  | 4.24701900  | 0.58762400  | C | 5.07609200  | -4.50225700 | -0.81398700 |
| C            | 4.24247700  | 4.34979300  | -2.22711300 | C | 5.74548600  | -3.53899700 | -0.05877300 |
| H            | 4.28218800  | 3.83940900  | -3.19408800 | H | 5.78194000  | -1.47113500 | 0.55420800  |
| H            | 3.80325700  | 5.34073500  | -2.37937700 | H | 3.75101800  | -0.86042700 | -0.73474800 |
| H            | 5.26793800  | 4.50368000  | -1.87435800 | H | 3.41911300  | -4.90702800 | -2.13213600 |
| H            | 6.59966400  | 0.33630600  | -1.85292800 | H | 5.43277800  | -5.52823200 | -0.82921100 |
| H            | 6.46697500  | 0.99430300  | 0.61584600  | H | 6.62679500  | -3.81065300 | 0.51502300  |
| C            | -3.94614700 | -0.15698200 | 1.82174000  | C | 2.23688000  | -2.44034900 | -2.35363300 |
| O            | -2.91596300 | 0.42583500  | 1.27056500  | H | 2.54460000  | -1.82250800 | -3.20487600 |
| O            | -4.54399900 | -1.14906500 | 1.40487400  | H | 1.75466400  | -3.33742700 | -2.75649500 |
| H            | 1.51364700  | -1.20148100 | 1.77763700  | C | 1.25803400  | -1.65788500 | -1.51656500 |
| C            | -4.38936800 | 0.51483300  | 3.12121700  | C | 1.09646800  | -0.30914900 | -1.64574200 |
| H            | -3.94134200 | -0.01874600 | 3.96597500  | H | 1.62493800  | 0.18109700  | -2.45617000 |
| H            | -4.07719700 | 1.56065100  | 3.16236700  | C | -0.52276000 | -1.94004900 | 0.05962300  |
| H            | -5.47453400 | 0.43550600  | 3.21683000  | N | 0.69998600  | -2.35171800 | -0.45499900 |
| C            | -0.95778700 | 0.70275800  | 4.15717100  | O | -1.53469600 | -1.92643900 | -0.71502200 |
| H            | -1.59152200 | 0.09341100  | 4.80615100  | C | 0.15011500  | -2.56003400 | 2.34467500  |
| H            | -0.38864800 | 1.43115700  | 4.73242200  | O | 1.32613500  | -2.78570700 | 2.13063100  |
| H            | -1.60613300 | 1.20326700  | 3.43013700  | O | -0.79020700 | -2.38991100 | 1.37324600  |
| <b>TS21H</b> |             |             |             |   |             |             |             |
| C            | -2.17457400 | 1.71621800  | -2.01232000 | H | -5.02243600 | -1.62993800 | -1.79315500 |
| C            | -2.56368800 | 0.52868800  | -2.70313600 | H | -5.49768600 | -0.75559800 | -3.27851500 |
| C            | -3.85831100 | 0.10718900  | -2.19020300 | H | -4.03196700 | -1.74877100 | -3.25174700 |
| C            | -4.22306100 | 1.00842800  | -1.15229700 | H | -0.22509500 | 2.05708500  | -2.86527500 |
| C            | -3.16002400 | 1.98206200  | -0.99353800 | H | -1.31897800 | 3.44835900  | -2.91063800 |
| Rh           | -2.32314100 | 0.00534100  | -0.55693500 | H | -0.53756100 | 2.96772800  | -1.39148500 |
| C            | -4.65144900 | -1.07394100 | -2.65669100 | C | 0.64814500  | 0.50356400  | -0.54052300 |
| C            | -1.81603100 | -0.16123800 | -3.80284200 | C | -0.35915200 | 0.16527500  | 0.35989900  |
| H            | -2.28544800 | 0.02651500  | -4.77600300 | C | -0.21209800 | 0.66964200  | 1.74459300  |
| H            | -0.77885100 | 0.17576400  | -3.85034500 | C | -1.23481900 | 1.32929600  | 2.44994300  |
| H            | -1.80215200 | -1.24130000 | -3.63243100 | C | 1.00978500  | 0.44992000  | 2.41945900  |
| C            | -0.99681800 | 2.59017400  | -2.30738200 | C | -1.03953900 | 1.76099800  | 3.76099600  |
| C            | -3.18980600 | 3.18531600  | -0.09970000 | H | -2.18905400 | 1.48095800  | 1.96650700  |
| H            | -2.18334400 | 3.46101200  | 0.22520300  | C | 1.20072200  | 0.86791600  | 3.73498400  |
| H            | -3.62821800 | 4.04929000  | -0.61671000 | H | 1.80572000  | -0.07932400 | 1.90573800  |
| H            | -3.78870900 | 2.99631600  | 0.79435100  | C | 0.17455500  | 1.52986800  | 4.41398000  |
| C            | -5.47944800 | 0.97424400  | -0.34058600 | H | -1.84518600 | 2.27308200  | 4.28057200  |
| H            | -5.26638000 | 1.21423600  | 0.70438500  | H | 2.14781100  | 0.67090400  | 4.23007800  |
| H            | -6.19316000 | 1.71562400  | -0.72209400 | H | 0.31657200  | 1.85578700  | 5.44064200  |
| H            | -5.93075000 | -0.01625600 | -0.36247000 | N | 1.37978200  | 1.69124900  | -0.28359400 |
| C            | 5.27003000  | -2.22502700 | -0.03720800 | N | 2.61903500  | 1.61367800  | -0.56663100 |
| C            | 4.13543700  | -1.87659200 | -0.76846900 | N | 3.31295600  | 2.73627000  | -0.43102500 |
|              |             |             |             | C | 4.77632700  | 2.52256800  | -0.41729700 |

|             |             |             |             |   |             |             |             |
|-------------|-------------|-------------|-------------|---|-------------|-------------|-------------|
| H           | 5.21693200  | 3.51791500  | -0.33232000 | C | -2.70775000 | 3.09958100  | 0.80691300  |
| C           | 5.20828000  | 1.69046000  | 0.80025700  | H | -1.64190500 | 3.16509400  | 1.04065200  |
| H           | 4.74122900  | 0.70278900  | 0.76543800  | H | -3.06913800 | 4.10971200  | 0.57458300  |
| H           | 4.91190200  | 2.17157600  | 1.73585700  | H | -3.22386400 | 2.75795500  | 1.70698100  |
| C           | 5.24843800  | 1.90100200  | -1.73692200 | C | -5.15423200 | 1.02959900  | 0.47691900  |
| H           | 4.84104900  | 0.89506800  | -1.86093100 | H | -4.81272000 | 1.19439100  | 1.50140900  |
| H           | 4.93049200  | 2.51113000  | -2.58738500 | H | -5.98132500 | 1.72198800  | 0.27566700  |
| C           | 2.67193700  | 3.97522300  | 0.06913000  | H | -5.51570400 | 0.00335200  | 0.40649500  |
| H           | 1.66356400  | 3.93853500  | -0.35091300 | C | 5.38588100  | -1.42770700 | -0.20722400 |
| C           | 2.54497500  | 3.97096800  | 1.59917800  | C | 4.33167800  | -1.08154000 | -1.05001400 |
| H           | 2.03901600  | 3.06668300  | 1.94335400  | C | 3.83658700  | -2.00159900 | -1.98679000 |
| H           | 1.96033900  | 4.83750700  | 1.92593700  | C | 4.41302700  | -3.27308700 | -2.05537600 |
| H           | 3.52996800  | 4.03362200  | 2.07423800  | C | 5.47158400  | -3.62073400 | -1.21189400 |
| C           | 3.37051600  | 5.22861000  | -0.46319200 | C | 5.96097500  | -2.69951700 | -0.28647300 |
| H           | 3.52493700  | 5.17069200  | -1.54496600 | H | 5.75541400  | -0.70567700 | 0.51578000  |
| H           | 2.74236900  | 6.09988300  | -0.25431200 | H | 3.86700500  | -0.10285000 | -0.96628300 |
| H           | 4.33748800  | 5.40729800  | 0.01831200  | H | 4.02905600  | -3.99901500 | -2.76746000 |
| H           | 6.34061800  | 1.83182100  | -1.74712500 | H | 5.90513200  | -4.61462300 | -1.27448200 |
| H           | 6.29549600  | 1.56196200  | 0.80701800  | H | 6.77991200  | -2.97075700 | 0.37344100  |
| C           | -3.94898200 | -1.49297100 | 1.37651000  | C | 2.65927900  | -1.62557200 | -2.88015500 |
| O           | -3.01365100 | -0.58904300 | 1.31504000  | H | 2.92964200  | -0.79418400 | -3.53946500 |
| O           | -4.63599900 | -1.92014700 | 0.44675100  | H | 2.38342100  | -2.47389300 | -3.51477100 |
| H           | 1.33389000  | -2.82813700 | 0.18830100  | C | 1.48909300  | -1.20768500 | -2.02106100 |
| C           | -4.13952800 | -2.04753100 | 2.78762900  | C | 1.22797000  | 0.13222000  | -1.76364800 |
| H           | -3.59860600 | -2.99800900 | 2.84925900  | H | 1.75222600  | 0.89290900  | -2.32530300 |
| H           | -3.74261200 | -1.37081100 | 3.54714300  | C | -0.31557200 | -1.82019700 | -0.53700400 |
| H           | -5.19748500 | -2.25268900 | 2.96712800  | N | 0.85298900  | -2.17964300 | -1.35910500 |
| C           | -0.48279000 | -2.44529900 | 3.70183200  | O | -1.39312000 | -1.64727800 | -1.29071900 |
| H           | -1.35077300 | -3.10584200 | 3.76830600  | C | 0.23513900  | -3.92060700 | 0.79175700  |
| H           | 0.24933100  | -2.69096500 | 4.47019300  | O | 1.26068100  | -4.26237800 | 0.21550700  |
| H           | -0.83957200 | -1.41889300 | 3.82735100  | O | -0.56895000 | -2.91235200 | 0.44582900  |
| <b>22II</b> |             |             |             | H | -5.01711400 | -1.21486300 | -1.57704500 |
| C           | -2.13309400 | 2.08719300  | -1.54180800 | H | -5.77263700 | 0.01932000  | -2.62967300 |
| C           | -2.69536900 | 1.09270500  | -2.39404500 | H | -4.38662300 | -0.92448700 | -3.20647800 |
| C           | -3.89354400 | 0.57783100  | -1.76095700 | H | -0.20893200 | 2.47972300  | -2.43307500 |
| C           | -4.04389300 | 1.25723200  | -0.50039100 | H | -1.36431300 | 3.81779500  | -2.50943100 |
| C           | -2.93929300 | 2.15810900  | -0.33567000 | H | -0.54639800 | 3.43310000  | -0.98832800 |
| Rh          | -2.17252000 | 0.09249800  | -0.49033600 | C | 0.65577500  | 0.45265800  | -0.50716500 |
| C           | -4.82515500 | -0.44526700 | -2.32858200 | C | -0.06102000 | -0.50990700 | 0.25397600  |
| C           | -2.14860600 | 0.61687600  | -3.70524700 | C | 0.23553000  | -0.52348100 | 1.72554100  |
| H           | -2.79863600 | 0.91507500  | -4.53586000 | C | -0.49874000 | 0.20734800  | 2.66790900  |
| H           | -1.14972600 | 1.01863400  | -3.88557300 | C | 1.36720700  | -1.23261900 | 2.16202800  |
| H           | -2.06849100 | -0.47437600 | -3.69942400 | C | -0.11696600 | 0.22354700  | 4.00903500  |
| C           | -0.99554000 | 2.99756200  | -1.88064100 | H | -1.37634600 | 0.75013500  | 2.34227200  |

|             |             |             |             |              |             |             |             |
|-------------|-------------|-------------|-------------|--------------|-------------|-------------|-------------|
| C           | 1.74134500  | -1.22934600 | 3.50776300  | O            | -1.59019800 | -1.11466100 | 0.00010200  |
| H           | 1.96364600  | -1.78510000 | 1.44056900  | C            | 0.53068000  | 0.01424900  | 0.00000300  |
| C           | 1.00019500  | -0.49801800 | 4.43780400  | C            | 1.10047000  | 1.43611800  | -0.00017100 |
| H           | -0.70037300 | 0.79668300  | 4.72502000  | H            | 2.20278300  | 1.43397100  | -0.00011200 |
| H           | 2.61743600  | -1.78985900 | 3.82288500  | H            | 0.74672400  | 1.98710200  | 0.87653900  |
| H           | 1.29025000  | -0.48919800 | 5.48486600  | H            | 0.74682900  | 1.98685300  | -0.87708200 |
| N           | 0.93177100  | 1.64579100  | 0.17966300  | C            | 0.99356300  | -0.74977700 | 1.25146300  |
| N           | 1.88874900  | 2.32251000  | -0.31830400 | H            | 2.08588300  | -0.89451400 | 1.27035400  |
| N           | 2.18739100  | 3.43609600  | 0.32953400  | H            | 0.49834300  | -1.72468400 | 1.27473900  |
| C           | 3.44259100  | 4.06651200  | -0.13593400 | H            | 0.71202400  | -0.20794300 | 2.16396200  |
| H           | 3.60921400  | 4.91598200  | 0.52912100  | C            | 0.99365600  | -0.75012500 | -1.25120800 |
| C           | 4.63689200  | 3.10872500  | -0.01181100 | H            | 2.08597900  | -0.89486100 | -1.26997900 |
| H           | 4.51197300  | 2.25702200  | -0.68556500 | H            | 0.71218300  | -0.20855100 | -2.16388200 |
| H           | 4.73171100  | 2.72797600  | 1.00886400  | H            | 0.49844000  | -1.72504000 | -1.27424600 |
| C           | 3.27091400  | 4.59092300  | -1.56595000 |              |             |             |             |
| H           | 3.06736600  | 3.76067300  | -2.24775300 | <b>14III</b> |             |             |             |
| H           | 2.43732400  | 5.29702100  | -1.62441500 | C            | 3.92755800  | -0.04556700 | 1.28680700  |
| C           | 1.55541700  | 3.75482200  | 1.63466000  | C            | 4.27540000  | -1.27142200 | 0.59263900  |
| H           | 0.53333700  | 3.38448100  | 1.53804500  | C            | 4.28569200  | -0.99655700 | -0.79289900 |
| C           | 2.22769500  | 2.97050600  | 2.76987300  | C            | 3.97993300  | 0.42109100  | -0.97625400 |
| H           | 2.20608900  | 1.89845000  | 2.56208700  | C            | 3.84122000  | 1.02153600  | 0.31826200  |
| H           | 1.69086600  | 3.13815700  | 3.70864500  | Rh           | 2.18591100  | -0.41298900 | -0.00934800 |
| H           | 3.26513200  | 3.29462400  | 2.90765400  | C            | 4.59679700  | -1.94872900 | -1.90515200 |
| C           | 1.50462900  | 5.26137400  | 1.89119400  | C            | 4.58294500  | -2.56959900 | 1.27425000  |
| H           | 1.09641900  | 5.79895000  | 1.02973300  | H            | 4.61606400  | -3.40475700 | 0.57464500  |
| H           | 0.85486200  | 5.45123400  | 2.75075500  | H            | 5.56036900  | -2.50780200 | 1.76686500  |
| H           | 2.48646500  | 5.68210400  | 2.13106600  | H            | 3.84554100  | -2.80145800 | 2.04890300  |
| H           | 4.18211500  | 5.09795200  | -1.89815500 | C            | 3.86358200  | 0.12086400  | 2.77040300  |
| H           | 5.56449200  | 3.62618500  | -0.27603900 | C            | 3.85168900  | 2.48228100  | 0.62753700  |
| C           | -3.58458700 | -1.91461300 | 1.19590300  | H            | 3.33278300  | 2.70279100  | 1.55967400  |
| O           | -2.66381900 | -0.99616800 | 1.20238600  | H            | 4.89340600  | 2.81106200  | 0.73130000  |
| O           | -4.42490700 | -2.12583200 | 0.31904100  | H            | 3.38298600  | 3.07340900  | -0.15873000 |
| H           | 1.29106000  | -3.08596600 | -1.17908300 | C            | 4.00709800  | 1.15107800  | -2.27942400 |
| C           | -3.58904200 | -2.74011300 | 2.48281500  | H            | 3.41037100  | 2.06321300  | -2.23088200 |
| H           | -3.86286800 | -3.77211300 | 2.24984900  | H            | 5.03912400  | 1.43260000  | -2.52577700 |
| H           | -2.61928100 | -2.70037500 | 2.98088600  | H            | 3.62861800  | 0.53137200  | -3.09538100 |
| H           | -4.35024200 | -2.33909500 | 3.16161800  | C            | -4.67672200 | -3.49973100 | 1.30400300  |
| C           | -0.28663400 | -4.60041700 | 2.03308700  | C            | -3.28571900 | -3.59853000 | 1.24353800  |
| H           | -1.36129700 | -4.77433000 | 1.94772300  | C            | -2.62868000 | -3.63756700 | 0.00746800  |
| H           | 0.24990400  | -5.53486500 | 2.19730600  | C            | -3.38690500 | -3.57985600 | -1.16839300 |
| H           | -0.12771400 | -3.92447400 | 2.87990600  | C            | -4.77802600 | -3.48265100 | -1.11098700 |
| <b>OPIV</b> |             |             |             | C            | -5.42532200 | -3.43862000 | 0.12619900  |
| O           | -1.61079600 | 1.16043100  | -0.00017700 | H            | -5.17491200 | -3.47541200 | 2.26844600  |
| C           | -1.06524100 | 0.02978500  | -0.00003500 | H            | -2.70561900 | -3.63950800 | 2.16202100  |
|             |             |             |             | H            | -2.88574800 | -3.60653600 | -2.13277500 |

|   |             |             |             |                |             |             |             |
|---|-------------|-------------|-------------|----------------|-------------|-------------|-------------|
| H | -5.35519900 | -3.44522400 | -2.02991000 | H              | -4.86710100 | 3.40146400  | -2.02278700 |
| H | -6.50751000 | -3.36453800 | 0.17214100  | H              | -4.18791600 | 4.91679600  | -1.41415100 |
| C | -1.11810400 | -3.65046400 | -0.05598800 | H              | -5.48953600 | 4.13307800  | -0.52611000 |
| H | -0.70799100 | -4.21007900 | 0.79715600  | C              | -3.19251500 | 3.87081400  | 1.02251600  |
| H | -0.78554000 | -4.18159100 | -0.96023400 | H              | -2.38331200 | 3.34123700  | 1.52958900  |
| C | -0.50738300 | -2.26026500 | -0.05826200 | H              | -2.86974600 | 4.90285100  | 0.85453700  |
| C | -1.20907600 | -1.11730700 | -0.00866400 | H              | -4.07628300 | 3.88872400  | 1.66913800  |
| H | -2.28287900 | -1.23219400 | 0.03266100  | H              | -6.41085300 | 0.27810800  | 1.61194000  |
| C | 1.65423200  | -3.17749400 | -0.31298900 | H              | -6.69983700 | 0.07330700  | -0.96148100 |
| N | 0.90965400  | -2.20120900 | -0.12598900 | <b>TS15III</b> |             |             |             |
| O | 2.40305900  | -4.05351600 | -0.48422200 | C              | 3.33930800  | -0.67576500 | 1.71277300  |
| H | 4.00891300  | -1.72188600 | -2.79823600 | C              | 3.91267000  | -1.64677000 | 0.81154700  |
| H | 5.65525400  | -1.86964200 | -2.18208200 | C              | 4.44269500  | -0.94007600 | -0.29979600 |
| H | 4.40463500  | -2.98580100 | -1.62465200 | C              | 4.25493000  | 0.48717400  | -0.07827300 |
| H | 3.51182700  | -0.78883100 | 3.26189700  | C              | 3.60064000  | 0.64596800  | 1.17798600  |
| H | 4.86390400  | 0.34622600  | 3.16313900  | Rh             | 2.13648100  | -0.49093000 | -0.18899500 |
| H | 3.20201100  | 0.94343300  | 3.04895700  | C              | 5.15848200  | -1.52848300 | -1.47769200 |
| C | -0.74873000 | 0.25914500  | -0.03427700 | C              | 3.86181500  | -3.13300000 | 0.99729600  |
| C | 0.57128100  | 0.72370300  | -0.01935400 | H              | 4.62160400  | -3.63477900 | 0.39476600  |
| C | 0.73540100  | 2.19878100  | -0.01844100 | H              | 4.03373300  | -3.39884600 | 2.04381200  |
| C | 0.67606400  | 2.92611500  | 1.18136900  | H              | 2.87954800  | -3.52520400 | 0.70301800  |
| C | 0.92248100  | 2.90006100  | -1.22062100 | C              | 2.73805300  | -0.98835700 | 3.04750100  |
| C | 0.80741900  | 4.31490400  | 1.18007100  | C              | 3.36923800  | 1.93136900  | 1.90539800  |
| H | 0.51642100  | 2.39257300  | 2.11455500  | H              | 2.46444000  | 1.89422000  | 2.51427100  |
| C | 1.05409700  | 4.29009500  | -1.22174200 | H              | 4.21545800  | 2.12806200  | 2.57486300  |
| H | 0.94340600  | 2.34791400  | -2.15604000 | H              | 3.27491700  | 2.77478100  | 1.22097000  |
| C | 1.00015100  | 5.00299500  | -0.02082200 | C              | 4.85411600  | 1.56718300  | -0.92529500 |
| H | 0.75655400  | 4.86169100  | 2.11735800  | H              | 4.38015700  | 2.53160500  | -0.74122700 |
| H | 1.19229600  | 4.81723000  | -2.16154700 | H              | 5.92335300  | 1.66834900  | -0.70086200 |
| H | 1.10330500  | 6.08369600  | -0.02146700 | H              | 4.76444500  | 1.33973500  | -1.99073300 |
| N | -1.71753300 | 1.26962600  | -0.08812200 | C              | -4.07940000 | -3.50262700 | 1.62759000  |
| N | -2.93131700 | 0.85308400  | -0.00746400 | C              | -2.75350500 | -3.55822900 | 1.19778200  |
| N | -3.85148800 | 1.77093300  | -0.10747200 | C              | -2.44628600 | -3.60813400 | -0.16962300 |
| C | -5.23429700 | 1.26884700  | 0.09518100  | C              | -3.49402800 | -3.60648100 | -1.09831300 |
| H | -5.86240300 | 2.16016300  | 0.12913600  | C              | -4.82324300 | -3.55510500 | -0.67117200 |
| C | -5.66216000 | 0.39506100  | -1.09019300 | C              | -5.11838700 | -3.49765700 | 0.69262600  |
| H | -5.03082500 | -0.49612800 | -1.14839300 | H              | -4.30267700 | -3.46960900 | 2.68986500  |
| H | -5.58560000 | 0.94273600  | -2.03376600 | H              | -1.94700700 | -3.55908600 | 1.92715200  |
| C | -5.36168900 | 0.53192200  | 1.43405200  | H              | -3.26936600 | -3.64552000 | -2.16125700 |
| H | -4.78145300 | -0.39417600 | 1.42518800  | H              | -5.62584900 | -3.56453900 | -1.40263700 |
| H | -5.01350400 | 1.15775800  | 2.26081200  | H              | -6.15110300 | -3.45857600 | 1.02561000  |
| C | -3.50885000 | 3.20357900  | -0.32231200 | C              | -1.00351400 | -3.57213400 | -0.62149700 |
| H | -2.58961500 | 3.17550800  | -0.91270700 | H              | -0.39482900 | -4.29804800 | -0.07435200 |
| C | -4.58721000 | 3.94352300  | -1.11505400 | H              | -0.92008900 | -3.83881100 | -1.68372000 |

|   |             |             |             |              |             |             |             |
|---|-------------|-------------|-------------|--------------|-------------|-------------|-------------|
| C | -0.34264000 | -2.19709900 | -0.45101400 | H            | -3.25466100 | 5.10239600  | 0.03759000  |
| C | -1.17372700 | -1.05225900 | -0.44660100 | H            | -4.31796200 | 4.16744700  | 1.10185700  |
| H | -2.23345800 | -1.22369500 | -0.58247100 | H            | -5.98722700 | 0.51781000  | 2.26101700  |
| C | 1.76440800  | -1.49824900 | -1.79978500 | H            | -6.81530000 | -0.00156600 | -0.14287100 |
| N | 0.97492600  | -2.21016500 | -0.35989300 | <b>16III</b> |             |             |             |
| O | 1.80781800  | -1.96400900 | -2.85929900 | C            | 3.05950600  | -1.03350700 | 1.47744100  |
| H | 4.92033800  | -0.99130600 | -2.39892100 | C            | 3.86516700  | -1.67591600 | 0.45617300  |
| H | 6.24256800  | -1.45859600 | -1.32772500 | C            | 4.49881300  | -0.65480400 | -0.28672300 |
| H | 4.90544100  | -2.57992300 | -1.62398400 | C            | 4.18267000  | 0.63553600  | 0.33471800  |
| H | 2.20228900  | -1.93979800 | 3.02470600  | C            | 3.33931600  | 0.38663400  | 1.44672800  |
| H | 3.52711700  | -1.06585300 | 3.80654300  | Rh           | 2.16170200  | -0.32712600 | -0.47970000 |
| H | 2.04318900  | -0.20969700 | 3.36795700  | C            | 5.46005100  | -0.83604300 | -1.42320700 |
| C | -0.77713200 | 0.27719300  | -0.32391700 | C            | 3.90806700  | -3.14896900 | 0.22524800  |
| C | 0.60188500  | 0.71204500  | -0.22670700 | H            | 4.65402600  | -3.42209100 | -0.52305100 |
| C | 0.84766000  | 2.15516200  | -0.11277800 | H            | 4.14724700  | -3.67568700 | 1.15458000  |
| C | 0.28561500  | 2.91236000  | 0.93679700  | H            | 2.92178100  | -3.48950100 | -0.11809400 |
| C | 1.66931900  | 2.80729800  | -1.05058500 | C            | 2.27795200  | -1.76571700 | 2.52406800  |
| C | 0.56668200  | 4.27002700  | 1.05684700  | C            | 2.88377100  | 1.37261700  | 2.47460600  |
| H | -0.35082300 | 2.42117800  | 1.66463100  | H            | 1.87400000  | 1.15150300  | 2.82583100  |
| C | 1.91231500  | 4.17656900  | -0.95080800 | H            | 3.55303900  | 1.33130800  | 3.34240100  |
| H | 2.09332900  | 2.23324100  | -1.86770500 | H            | 2.88735700  | 2.39383500  | 2.09251200  |
| C | 1.37315400  | 4.90959700  | 0.10945800  | C            | 4.83255800  | 1.93530600  | -0.03143500 |
| H | 0.14988800  | 4.83402600  | 1.88576300  | H            | 4.28061800  | 2.78808700  | 0.36588600  |
| H | 2.52722100  | 4.66945700  | -1.69778000 | H            | 5.84979800  | 1.97478000  | 0.37717100  |
| H | 1.57660800  | 5.97235400  | 0.19625500  | H            | 4.91423100  | 2.05616000  | -1.11493300 |
| N | -1.72687100 | 1.30074800  | -0.35711900 | C            | -2.99567800 | -3.36098200 | 2.08975600  |
| N | -2.89908900 | 0.90161000  | 0.00021800  | C            | -1.87200200 | -3.37008800 | 1.26448700  |
| N | -3.87216000 | 1.74937700  | -0.13724300 | C            | -1.99775400 | -3.59092600 | -0.11548400 |
| C | -5.17286200 | 1.29128600  | 0.42141700  | C            | -3.27470000 | -3.79789700 | -0.65103400 |
| H | -5.78847500 | 2.19170900  | 0.48085000  | C            | -4.40260800 | -3.79107400 | 0.17348800  |
| C | -5.83220900 | 0.28422400  | -0.52830200 | C            | -4.26632800 | -3.56877000 | 1.54499900  |
| H | -5.21932700 | -0.61890300 | -0.60364600 | H            | -2.88216300 | -3.19565800 | 3.15719400  |
| H | -5.96514800 | 0.70520200  | -1.52813800 | H            | -0.88503600 | -3.20121900 | 1.68911600  |
| C | -5.00137900 | 0.72342600  | 1.83436700  | H            | -3.38737300 | -3.97134900 | -1.71837700 |
| H | -4.43280500 | -0.20923300 | 1.81313800  | H            | -5.38535200 | -3.96081500 | -0.25617100 |
| H | -4.48635400 | 1.43599300  | 2.48521800  | H            | -5.14221200 | -3.56331400 | 2.18655400  |
| C | -3.67991100 | 3.11280000  | -0.70158200 | C            | -0.77054000 | -3.53058800 | -1.00539400 |
| H | -2.76477000 | 3.03849000  | -1.29137300 | H            | -0.02188600 | -4.27354700 | -0.71756900 |
| C | -4.83339100 | 3.51833300  | -1.62183400 | H            | -1.04729100 | -3.73028700 | -2.04748700 |
| H | -4.99054000 | 2.78252100  | -2.41490100 | C            | -0.11769400 | -2.14417400 | -0.92123200 |
| H | -4.58301900 | 4.47313900  | -2.09272200 | C            | -1.03483500 | -1.02802500 | -1.06362500 |
| H | -5.77440900 | 3.65933500  | -1.08230100 | H            | -2.03460700 | -1.25887200 | -1.41773100 |
| C | -3.44425800 | 4.10472300  | 0.44476000  | C            | 2.12863700  | 0.06087900  | -2.34055300 |
| H | -2.57494700 | 3.80560900  | 1.03547100  | N            | 1.13428900  | -2.06602300 | -0.66494300 |



|               |             |             |             |    |             |             |             |
|---------------|-------------|-------------|-------------|----|-------------|-------------|-------------|
| O             | 2.11623300  | 0.27669300  | -3.46561300 | C  | 0.63847500  | -0.30282600 | 2.74568500  |
| H             | 5.39325000  | -0.01718300 | -2.14360100 | C  | -0.13759000 | -1.46479700 | 2.34498600  |
| H             | 6.48877000  | -0.85315600 | -1.04344600 | C  | 0.77011900  | -2.57468800 | 2.17411400  |
| H             | 5.28321900  | -1.77214300 | -1.95565400 | C  | 2.09403600  | -2.07091600 | 2.28681000  |
| H             | 1.78555600  | -2.63964700 | 2.09136200  | C  | 2.00016800  | -0.65552300 | 2.66915400  |
| H             | 2.94485100  | -2.11300400 | 3.32294600  | Rh | 1.07652800  | -1.03786300 | 0.54708800  |
| H             | 1.51626100  | -1.12738300 | 2.97656700  | C  | 0.38830900  | -3.99738000 | 1.89102400  |
| C             | -0.80049500 | 0.27985800  | -0.67992100 | C  | -1.63471400 | -1.54009800 | 2.35386800  |
| C             | 0.49041400  | 0.74035900  | -0.26781100 | H  | -1.99767800 | -1.95065500 | 3.30473200  |
| C             | 0.60147700  | 2.09321000  | 0.26435800  | H  | -2.07605800 | -0.55066100 | 2.21902400  |
| C             | -0.23718100 | 2.51009000  | 1.32414500  | H  | -2.01510100 | -2.17251700 | 1.54757800  |
| C             | 1.55256900  | 3.00313400  | -0.24107200 | C  | 0.04509400  | 1.02548100  | 3.10135300  |
| C             | -0.09452800 | 3.77774500  | 1.87847700  | C  | 3.18341200  | 0.20042100  | 2.99826500  |
| H             | -0.97438900 | 1.82205500  | 1.72157200  | H  | 2.90644100  | 1.25294200  | 3.09988200  |
| C             | 1.64835100  | 4.29102400  | 0.27854500  | H  | 3.62395500  | -0.12311500 | 3.95017600  |
| H             | 2.18975600  | 2.70146000  | -1.06455900 | H  | 3.93906300  | 0.10473800  | 2.21597400  |
| C             | 0.83741700  | 4.67728000  | 1.35006200  | C  | 3.35809500  | -2.87183500 | 2.22694600  |
| H             | -0.72141800 | 4.07222200  | 2.71437100  | H  | 4.15483900  | -2.28080000 | 1.77546200  |
| H             | 2.36008100  | 4.99163900  | -0.14701900 | H  | 3.66268700  | -3.18854700 | 3.23367800  |
| H             | 0.92779900  | 5.67479400  | 1.76850800  | H  | 3.21883000  | -3.76883200 | 1.61795800  |
| N             | -1.84919300 | 1.22528700  | -0.69627200 | C  | -5.06881000 | -4.22665200 | 0.11157700  |
| N             | -2.96357600 | 0.68195500  | -0.36507300 | C  | -3.71838100 | -4.02513600 | -0.17694300 |
| N             | -4.03614900 | 1.41847300  | -0.46041700 | C  | -3.32133900 | -3.47570000 | -1.40249300 |
| C             | -5.25299800 | 0.79929600  | 0.12680600  | C  | -4.30696900 | -3.13483200 | -2.33743700 |
| H             | -5.99697100 | 1.59843600  | 0.15012500  | C  | -5.65882000 | -3.33332500 | -2.05263100 |
| C             | -5.75945000 | -0.33676500 | -0.76848900 | C  | -6.04364200 | -3.87867300 | -0.82582100 |
| H             | -5.01923300 | -1.14103600 | -0.80748900 | H  | -5.35898600 | -4.65794100 | 1.06546200  |
| H             | -5.95346500 | 0.01642700  | -1.78504600 | H  | -2.96209100 | -4.30346800 | 0.55315700  |
| C             | -4.99551400 | 0.33228200  | 1.56438500  | H  | -4.00983200 | -2.70774300 | -3.29200500 |
| H             | -4.27683400 | -0.49071100 | 1.58000200  | H  | -6.41073900 | -3.06494400 | -2.78933000 |
| H             | -4.60935900 | 1.15130500  | 2.17891100  | H  | -7.09521200 | -4.03565700 | -0.60397400 |
| C             | -4.00501300 | 2.81300000  | -0.96812600 | C  | -1.86232800 | -3.20963900 | -1.68923200 |
| H             | -3.11353100 | 2.85295000  | -1.59810400 | H  | -1.23016100 | -3.90334300 | -1.12117500 |
| C             | -5.23065900 | 3.13134500  | -1.82811300 | H  | -1.63518400 | -3.40876300 | -2.74383400 |
| H             | -5.37284800 | 2.38331700  | -2.61288400 | C  | -1.43455900 | -1.79001600 | -1.36417900 |
| H             | -5.07946300 | 4.10190700  | -2.30918500 | C  | -2.23422300 | -0.77054300 | -0.92836700 |
| H             | -6.15096300 | 3.20176300  | -1.24095600 | H  | -3.31299400 | -0.84331000 | -0.90037400 |
| C             | -3.82134300 | 3.78974700  | 0.19997200  | C  | 0.83466000  | -2.32742500 | -0.97395500 |
| H             | -2.89899200 | 3.56802800  | 0.74251000  | N  | -0.09571100 | -1.47002600 | -1.43000800 |
| H             | -3.76030100 | 4.81567000  | -0.17603500 | O  | 1.28676700  | -3.40601200 | -1.25371400 |
| H             | -4.66610700 | 3.73453800  | 0.89498000  | C  | 3.75260600  | -0.37361900 | -0.78002100 |
| H             | -5.93135000 | -0.01873200 | 2.00900400  | C  | 4.50539000  | 0.09993300  | -2.05138200 |
| H             | -6.68902300 | -0.74812800 | -0.36383500 | C  | 5.35539600  | -1.09362900 | -2.53287400 |
| <b>TS14IV</b> |             |             |             | H  | 5.96302300  | -0.80608400 | -3.39907600 |

|   |             |             |             |             |             |             |             |
|---|-------------|-------------|-------------|-------------|-------------|-------------|-------------|
| H | 6.01917300  | -1.43439500 | -1.73378800 | C           | -4.83468200 | 4.58485000  | 0.06377300  |
| H | 4.71640100  | -1.93291000 | -2.82963000 | H           | -5.30487100 | 3.86693800  | 0.74184900  |
| C | 5.42870500  | 1.26279000  | -1.64072500 | H           | -5.54493000 | 4.81917700  | -0.73553000 |
| H | 6.04421100  | 1.58082900  | -2.49034500 | H           | -4.64871600 | 5.51143000  | 0.61727600  |
| H | 4.84087500  | 2.12544200  | -1.30773000 | C           | -2.85513000 | 4.96969300  | -1.51071900 |
| H | 6.08413900  | 0.95686100  | -0.82177000 | H           | -1.94774600 | 4.51299600  | -1.91548900 |
| C | 3.54483700  | 0.55241300  | -3.16000800 | H           | -3.52307700 | 5.21926400  | -2.34160200 |
| H | 4.11442000  | 0.87628500  | -4.03978500 | H           | -2.57617500 | 5.90565400  | -1.01418900 |
| H | 2.87649700  | -0.26005800 | -3.45595200 | H           | -0.20369800 | 5.47317500  | 2.02252900  |
| H | 2.92027000  | 1.38462100  | -2.82529000 | H           | -2.09200000 | 4.78662700  | 3.66470700  |
| O | 2.46652800  | -0.41557000 | -0.91485800 | <b>15IV</b> |             |             |             |
| O | 4.39811600  | -0.66229000 | 0.23366700  | C           | -0.78496000 | -0.08525000 | 2.62653100  |
| H | 1.02561100  | -4.43014200 | 1.11570000  | C           | -2.03381200 | -0.12809000 | 1.85915200  |
| H | 0.48350700  | -4.60904400 | 2.79606300  | C           | -2.37002000 | -1.51004000 | 1.65695200  |
| H | -0.64819500 | -4.06725000 | 1.55071100  | C           | -1.23267600 | -2.27693200 | 2.07084200  |
| H | -0.60073100 | 1.39732500  | 2.29888200  | C           | -0.30055500 | -1.38167600 | 2.76830300  |
| H | -0.56295700 | 0.94867100  | 4.01156900  | Rh          | -0.64553800 | -1.01752400 | 0.35727800  |
| H | 0.81889200  | 1.77514100  | 3.28071700  | C           | -3.65505000 | -2.07971800 | 1.13857000  |
| C | -1.57221000 | 0.42737800  | -0.54121700 | C           | -2.93399000 | 1.05795100  | 1.68388600  |
| C | -0.17941900 | 0.49923700  | -0.42913400 | H           | -3.38834400 | 1.34208600  | 2.64260700  |
| C | 0.56033100  | 1.68700600  | -0.85432700 | H           | -2.37917000 | 1.92271300  | 1.31067800  |
| C | 1.66086800  | 2.17510100  | -0.12223000 | H           | -3.74109000 | 0.85678000  | 0.98092000  |
| C | 0.17458400  | 2.38553900  | -2.01815100 | C           | -0.19400700 | 1.18399600  | 3.14641900  |
| C | 2.31541500  | 3.34082000  | -0.50647800 | C           | 0.90033100  | -1.84893400 | 3.52696800  |
| H | 1.99840700  | 1.62557700  | 0.74782600  | H           | 1.52470700  | -1.01204300 | 3.84669300  |
| C | 0.84323600  | 3.54011600  | -2.41561400 | H           | 0.58880200  | -2.40559400 | 4.42080500  |
| H | -0.65979900 | 2.00883200  | -2.60078100 | H           | 1.52752000  | -2.49043800 | 2.90729200  |
| C | 1.91234100  | 4.02700400  | -1.65586700 | C           | -1.11719000 | -3.76858300 | 2.04333800  |
| H | 3.15369300  | 3.70479300  | 0.08000700  | H           | -0.07613000 | -4.07560100 | 1.92625800  |
| H | 0.53847100  | 4.05646900  | -3.32146200 | H           | -1.49513000 | -4.20406300 | 2.97812000  |
| H | 2.43776100  | 4.92522200  | -1.96721000 | H           | -1.68805600 | -4.19036000 | 1.21316700  |
| N | -2.38711400 | 1.57204800  | -0.42352200 | C           | -6.29190400 | 0.33053800  | -0.31120200 |
| N | -1.99614900 | 2.39075000  | 0.46902600  | C           | -5.25275400 | 0.22583800  | -1.23996900 |
| N | -2.61407800 | 3.56013800  | 0.50912900  | C           | -4.50205300 | 1.35277100  | -1.59408700 |
| C | -2.07378700 | 4.50162800  | 1.51114700  | C           | -4.81581000 | 2.58657400  | -1.00945000 |
| H | -2.56563800 | 5.45540100  | 1.30021200  | C           | -5.84763500 | 2.69167500  | -0.07722100 |
| C | -2.45751900 | 4.06304000  | 2.92907600  | C           | -6.58865900 | 1.56095100  | 0.27681100  |
| H | -2.01558200 | 3.08932600  | 3.15529300  | H           | -6.86364500 | -0.55363200 | -0.04375400 |
| H | -3.54360000 | 3.98071200  | 3.03214300  | H           | -5.00277200 | -0.73598500 | -1.67648700 |
| C | -0.56095400 | 4.69175500  | 1.34414400  | H           | -4.24375200 | 3.46973000  | -1.28208700 |
| H | -0.02834200 | 3.76559900  | 1.56600600  | H           | -6.07551100 | 3.65480600  | 0.37053900  |
| H | -0.31183300 | 4.97612800  | 0.31833800  | H           | -7.39323000 | 1.64056700  | 1.00198800  |
| C | -3.55362900 | 4.00428700  | -0.54245400 | C           | -3.36218300 | 1.23266100  | -2.59186300 |
| H | -3.80718200 | 3.09098900  | -1.08266800 | H           | -3.44671200 | 0.29476100  | -3.14263200 |

|   |             |             |             |              |             |             |             |
|---|-------------|-------------|-------------|--------------|-------------|-------------|-------------|
| H | -3.43389700 | 2.04870000  | -3.32165300 | N            | 2.71334100  | 3.08290600  | 0.72129000  |
| C | -1.98456100 | 1.30711700  | -1.98993300 | C            | 3.48208400  | 2.66395700  | 1.91858000  |
| C | -1.32433700 | 2.39675700  | -1.43429200 | H            | 4.48574600  | 3.07106300  | 1.76233400  |
| H | -1.68100500 | 3.41738600  | -1.42171600 | C            | 2.89426000  | 3.30709900  | 3.18294500  |
| C | -1.69564700 | -1.06595800 | -1.29781000 | H            | 1.86951800  | 2.96654700  | 3.34076800  |
| N | -1.18699600 | 0.20060100  | -1.88573200 | H            | 2.88493300  | 4.39749500  | 3.10873100  |
| O | -2.59596700 | -1.69537900 | -1.78925100 | C            | 3.60414900  | 1.14027500  | 2.03605300  |
| C | 1.87333100  | -2.50875700 | 0.02982200  | H            | 2.63394600  | 0.64281400  | 2.07303300  |
| C | 2.69951300  | -3.70203400 | -0.51597300 | H            | 4.15197000  | 0.71997000  | 1.18972100  |
| C | 2.24539700  | -4.94535300 | 0.27923900  | C            | 3.22511300  | 4.13307700  | -0.19316900 |
| H | 2.80912900  | -5.83031900 | -0.03845200 | H            | 2.38675200  | 4.34588500  | -0.85768800 |
| H | 2.41351200  | -4.80616100 | 1.35363000  | C            | 3.59581200  | 5.41810000  | 0.55144700  |
| H | 1.18112600  | -5.14040900 | 0.11520700  | H            | 2.74399500  | 5.80805800  | 1.11567600  |
| C | 4.19435700  | -3.44630500 | -0.27395400 | H            | 3.89925600  | 6.17798100  | -0.17538900 |
| H | 4.78484900  | -4.31196500 | -0.59636700 | H            | 4.43325100  | 5.27246200  | 1.24141300  |
| H | 4.53100300  | -2.57188700 | -0.83877200 | C            | 4.38218000  | 3.56521700  | -1.02685700 |
| H | 4.38841300  | -3.25497900 | 0.78377300  | H            | 4.06948000  | 2.65685700  | -1.54830100 |
| C | 2.42956800  | -3.91861200 | -2.01412900 | H            | 4.70150200  | 4.30253000  | -1.77035400 |
| H | 3.00684000  | -4.77602400 | -2.38145100 | H            | 5.24897000  | 3.32557300  | -0.40087700 |
| H | 1.36878300  | -4.10401200 | -2.19431000 | H            | 4.15773400  | 0.89476300  | 2.94748600  |
| H | 2.71717500  | -3.03673500 | -2.59248600 | H            | 3.48898000  | 3.02820200  | 4.05851900  |
| O | 0.69217900  | -2.40978800 | -0.49100800 |              |             |             |             |
| O | 2.33248300  | -1.78259200 | 0.92397700  | <b>TS14V</b> |             |             |             |
| H | -3.48159200 | -2.76289100 | 0.30355200  | C            | -1.15485100 | -0.75859200 | -2.56172000 |
| H | -4.16705000 | -2.62807400 | 1.93864600  | C            | -1.18792700 | -2.12497200 | -2.13715200 |
| H | -4.32064300 | -1.29310600 | 0.78454900  | C            | -2.51440100 | -2.42973700 | -1.62353200 |
| H | 0.02389800  | 1.87442500  | 2.32701900  | C            | -3.28038600 | -1.26889300 | -1.72941400 |
| H | -0.89259500 | 1.68309900  | 3.82949800  | C            | -2.42035200 | -0.18256200 | -2.22435000 |
| H | 0.73586200  | 0.99850700  | 3.68596300  | Rh           | -1.36950600 | -0.54210300 | -0.32484900 |
| C | -0.08488300 | 1.95949000  | -0.92126400 | C            | -2.97901500 | -3.72407500 | -1.02767500 |
| C | 0.05974200  | 0.54923700  | -1.21659800 | C            | -0.09911300 | -3.09021700 | -2.47183300 |
| C | 1.29486000  | 0.09374100  | -1.93423800 | H            | 0.02614800  | -3.13103500 | -3.56090300 |
| C | 2.55555100  | 0.15063300  | -1.32886900 | H            | 0.85751300  | -2.76570600 | -2.04845500 |
| C | 1.21788600  | -0.29504500 | -3.28254200 | H            | -0.31750600 | -4.10098700 | -2.12472400 |
| C | 3.71068600  | -0.12763500 | -2.05777800 | C            | -0.02861700 | -0.14602000 | -3.33406600 |
| H | 2.61382400  | 0.34820400  | -0.27237800 | C            | -2.92224600 | 1.19199000  | -2.54238400 |
| C | 2.37383200  | -0.58653300 | -4.00665600 | H            | -2.11654000 | 1.85494800  | -2.85813300 |
| H | 0.24969500  | -0.35593600 | -3.76621700 | H            | -3.67544600 | 1.14863500  | -3.33850800 |
| C | 3.62947600  | -0.49054300 | -3.40410000 | H            | -3.38126200 | 1.63613100  | -1.65451200 |
| H | 4.67577200  | -0.08463900 | -1.56011700 | C            | -4.73756500 | -1.11210600 | -1.45118300 |
| H | 2.29002300  | -0.88320000 | -5.04851200 | H            | -4.95246000 | -0.12252400 | -1.04170500 |
| H | 4.52953900  | -0.71536800 | -3.96900400 | H            | -5.29818800 | -1.20489200 | -2.39171200 |
| N | 0.88993300  | 2.82506400  | -0.49112200 | H            | -5.09773200 | -1.85796500 | -0.74407100 |
| N | 1.62669600  | 2.39173900  | 0.46552900  | C            | 3.75598500  | -4.98398200 | -0.19790300 |
|   |             |             |             | C            | 2.43657200  | -4.52295000 | -0.22712300 |

|   |             |             |             |            |             |             |             |
|---|-------------|-------------|-------------|------------|-------------|-------------|-------------|
| C | 1.96852200  | -3.63301400 | 0.74446400  | C          | -1.31333200 | 3.08236700  | 0.26783300  |
| C | 2.84928200  | -3.21486200 | 1.75408000  | C          | -0.27596500 | 4.40313400  | -1.96111500 |
| C | 4.16738400  | -3.66622000 | 1.78275300  | H          | 0.82668200  | 2.59117600  | -2.32289400 |
| C | 4.62621500  | -4.55243700 | 0.80301500  | C          | -1.68728500 | 4.39719000  | -0.00466800 |
| H | 4.10172800  | -5.67734400 | -0.95951900 | H          | -1.70521400 | 2.56928900  | 1.13341100  |
| H | 1.76624000  | -4.86132800 | -1.01196900 | C          | -1.18198800 | 5.06112300  | -1.12494500 |
| H | 2.49530100  | -2.51841400 | 2.50960400  | H          | 0.14127000  | 4.91550000  | -2.82409600 |
| H | 4.83613400  | -3.32943800 | 2.56985600  | H          | -2.37419700 | 4.90613100  | 0.66626800  |
| H | 5.65318500  | -4.90556100 | 0.82401000  | H          | -1.48024300 | 6.08390400  | -1.33766700 |
| C | 0.54968600  | -3.09377700 | 0.71790200  | N          | 2.31633500  | 1.55033000  | -0.19437200 |
| H | -0.06940700 | -3.68334800 | 0.03844300  | N          | 3.46248900  | 1.02468700  | -0.05670600 |
| H | 0.09180600  | -3.19813100 | 1.70464400  | N          | 4.50212500  | 1.86047400  | -0.06881900 |
| C | 0.51290900  | -1.63001200 | 0.34776700  | C          | 5.75705000  | 1.22332700  | 0.37864200  |
| C | 1.52953200  | -0.81584300 | 0.02041200  | H          | 6.48338200  | 2.03534900  | 0.46725700  |
| H | 2.54170300  | -1.19882800 | -0.03378100 | C          | 5.60515000  | 0.55742800  | 1.75522300  |
| C | -0.52499900 | -0.15700900 | 2.47053300  | H          | 4.90288300  | -0.27843700 | 1.69599800  |
| N | -0.78767800 | -1.03244700 | 1.66369400  | H          | 5.22926000  | 1.26905900  | 2.49568400  |
| O | -0.30511300 | 0.62888700  | 3.32898700  | C          | 6.25729900  | 0.23206600  | -0.67918100 |
| C | -3.66407100 | -0.03306200 | 1.33998300  | H          | 5.52642800  | -0.57068100 | -0.81259300 |
| C | -4.55519100 | 0.89477600  | 2.20079500  | H          | 6.40175800  | 0.73091700  | -1.64209100 |
| C | -5.79278900 | 0.11399900  | 2.66589100  | C          | 4.31157600  | 3.32569500  | -0.08299300 |
| H | -6.41576800 | 0.74537900  | 3.30932400  | H          | 3.37256600  | 3.47019100  | -0.62198000 |
| H | -6.39719700 | -0.20835100 | 1.81176000  | C          | 4.13208200  | 3.87172000  | 1.34008500  |
| H | -5.50246200 | -0.78114000 | 3.21976500  | H          | 3.30436400  | 3.36045300  | 1.83832000  |
| C | -4.98244200 | 2.13445400  | 1.39271700  | H          | 3.90763400  | 4.94322200  | 1.31304700  |
| H | -5.60330100 | 2.79100200  | 2.01275500  | H          | 5.04321500  | 3.73192900  | 1.93268200  |
| H | -4.11640500 | 2.69887300  | 1.04193300  | C          | 5.43040400  | 4.03063300  | -0.85418400 |
| H | -5.57526800 | 1.84787700  | 0.51579100  | H          | 5.56706100  | 3.58439700  | -1.84377200 |
| C | -3.71201400 | 1.32569500  | 3.42071900  | H          | 5.16918100  | 5.08539400  | -0.98577200 |
| H | -4.30287200 | 1.97885000  | 4.07291100  | H          | 6.38905300  | 3.99902900  | -0.32554500 |
| H | -3.39720400 | 0.45503800  | 4.00477300  | H          | 7.20848700  | -0.21347100 | -0.36995300 |
| H | -2.81074100 | 1.86277900  | 3.11573000  | H          | 6.57230400  | 0.17646600  | 2.09969300  |
| O | -2.76273000 | 0.63240700  | 0.64896500  | <b>15V</b> |             |             |             |
| O | -3.80278200 | -1.25354300 | 1.34097000  | C          | 1.02724800  | 0.83093300  | -2.42950800 |
| H | -3.41215500 | -3.53044700 | -0.04097200 | C          | 1.26430100  | 2.22213100  | -2.07374500 |
| H | -3.74263700 | -4.20473600 | -1.65019600 | C          | 2.63097400  | 2.38822100  | -1.67364000 |
| H | -2.15686300 | -4.43335200 | -0.90576800 | C          | 3.25585200  | 1.14555300  | -1.82167000 |
| H | 0.93129200  | -0.33114100 | -2.84349900 | C          | 2.24735100  | 0.14826300  | -2.21877200 |
| H | 0.01327200  | -0.58093900 | -4.34087500 | Rh         | 1.23100000  | 0.58770100  | -0.18181400 |
| H | -0.15603900 | 0.93120100  | -3.43392800 | C          | 3.28068700  | 3.62355000  | -1.13081200 |
| C | 1.27377500  | 0.60053200  | -0.18779500 | C          | 0.27679500  | 3.28763600  | -2.39123100 |
| C | -0.02085300 | 1.00824600  | -0.32234700 | H          | 0.17968200  | 3.35359700  | -3.48312600 |
| C | -0.42340700 | 2.39581200  | -0.57850300 | H          | -0.71338800 | 3.02975100  | -2.00050100 |
| C | 0.10157400  | 3.08955100  | -1.68938600 | H          | 0.57262300  | 4.26812400  | -2.01673800 |

|   |             |             |             |   |             |             |             |
|---|-------------|-------------|-------------|---|-------------|-------------|-------------|
| C | -0.18748400 | 0.35524300  | -3.16446000 | O | 3.98226100  | 1.12303700  | 1.04354300  |
| C | 2.60140800  | -1.25932900 | -2.57295600 | H | 3.73082200  | 3.38495600  | -0.16132500 |
| H | 1.73947900  | -1.82475600 | -2.92330900 | H | 4.07050700  | 3.99389200  | -1.79438100 |
| H | 3.36708900  | -1.26180400 | -3.35832000 | H | 2.55930500  | 4.43120700  | -0.98574700 |
| H | 3.00781900  | -1.77199900 | -1.69615000 | H | -1.10311000 | 0.66275300  | -2.65323500 |
| C | 4.71177200  | 0.85070900  | -1.74144700 | H | -0.20112200 | 0.78121800  | -4.17583000 |
| H | 4.88712400  | -0.15380900 | -1.35000700 | H | -0.19747800 | -0.73077700 | -3.25218600 |
| H | 5.13571200  | 0.87983000  | -2.75595000 | C | -1.40286600 | -0.55094300 | -0.17223100 |
| H | 5.23776900  | 1.56668500  | -1.11210300 | C | -0.10121700 | -0.96464900 | -0.21388900 |
| C | -3.55153000 | 5.20578600  | 0.12153600  | C | 0.31616100  | -2.35840500 | -0.38132500 |
| C | -2.27874000 | 4.64719200  | -0.02057900 | C | -0.14698800 | -3.10273500 | -1.48610400 |
| C | -1.81684600 | 3.67664500  | 0.87540300  | C | 1.12809400  | -3.00799800 | 0.56598100  |
| C | -2.65924600 | 3.27797100  | 1.92428200  | C | 0.21423600  | -4.43716300 | -1.65457600 |
| C | -3.93287200 | 3.82762600  | 2.06624300  | H | -0.81069400 | -2.62495100 | -2.19867500 |
| C | -4.38448800 | 4.79373000  | 1.16246700  | C | 1.48424600  | -4.34497700 | 0.39710900  |
| H | -3.89062100 | 5.96236100  | -0.58083900 | H | 1.46184100  | -2.45821300 | 1.43407900  |
| H | -1.63594800 | 4.97496700  | -0.83349300 | C | 1.04155500  | -5.06194300 | -0.71692000 |
| H | -2.30869600 | 2.52381300  | 2.62422300  | H | -0.15240300 | -4.99100300 | -2.51471900 |
| H | -4.57112900 | 3.50618000  | 2.88466900  | H | 2.10759600  | -4.82893200 | 1.14374700  |
| H | -5.37548600 | 5.22466700  | 1.27289000  | H | 1.32720800  | -6.10197700 | -0.84723800 |
| C | -0.45836900 | 3.02716200  | 0.71227500  | N | -2.43612100 | -1.50256100 | -0.20241100 |
| H | 0.21339600  | 3.67175300  | 0.13774100  | N | -3.59409800 | -0.97943500 | -0.17741600 |
| H | 0.02426400  | 2.90655200  | 1.68899800  | N | -4.61711600 | -1.83011100 | -0.22344900 |
| C | -0.52475600 | 1.63743200  | 0.12481900  | C | -5.91362900 | -1.19702800 | 0.09110400  |
| C | -1.62423800 | 0.87331500  | 0.00369000  | H | -6.63882100 | -2.01358500 | 0.12381400  |
| H | -2.62841900 | 1.26007200  | 0.13654000  | C | -5.89561400 | -0.51009900 | 1.46524800  |
| C | 0.83527900  | 0.00364600  | 2.63126600  | H | -5.18986800 | 0.32507900  | 1.46362000  |
| N | 1.13529500  | 0.89742600  | 1.86781700  | H | -5.59590000 | -1.21059600 | 2.24987300  |
| O | 0.58969400  | -0.82448700 | 3.45347800  | C | -6.31926800 | -0.22863000 | -1.02655900 |
| C | 3.78575200  | -0.09210800 | 1.05360300  | H | -5.58535800 | 0.57807800  | -1.10709400 |
| C | 4.72509800  | -1.05296900 | 1.82487400  | H | -6.36991100 | -0.74593000 | -1.98930800 |
| C | 6.09508500  | -0.38020300 | 1.99841000  | C | -4.40169300 | -3.29248900 | -0.18358600 |
| H | 6.75774900  | -1.02349700 | 2.58811700  | H | -3.44825500 | -3.43793000 | -0.69691900 |
| H | 6.57112900  | -0.20073700 | 1.02801800  | C | -4.24132600 | -3.78702000 | 1.26045000  |
| H | 5.99319800  | 0.58361800  | 2.50066900  | H | -3.43642800 | -3.24110500 | 1.75859500  |
| C | 4.88242500  | -2.39157300 | 1.08360500  | H | -3.99143400 | -4.85314700 | 1.27215200  |
| H | 5.53918400  | -3.05989400 | 1.65207300  | H | -5.16899100 | -3.65023800 | 1.82738600  |
| H | 3.91929600  | -2.88331700 | 0.94000800  | C | -5.48916000 | -4.04715900 | -0.95216700 |
| H | 5.33375400  | -2.24503700 | 0.09489100  | H | -5.63288600 | -3.62507300 | -1.95142700 |
| C | 4.07227400  | -1.28423200 | 3.20566800  | H | -5.18873500 | -5.09380000 | -1.06231500 |
| H | 4.70154300  | -1.94829700 | 3.80938000  | H | -6.45259700 | -4.04191100 | -0.43173200 |
| H | 3.95814800  | -0.33765800 | 3.74281700  | H | -7.29868100 | 0.21250000  | -0.81508300 |
| H | 3.08108500  | -1.73534500 | 3.11513100  | H | -6.89095200 | -0.12362600 | 1.70795600  |
| O | 2.79200200  | -0.70267600 | 0.45661500  |   |             |             |             |

**TS16-I**

|    |             |             |             |   |             |             |             |
|----|-------------|-------------|-------------|---|-------------|-------------|-------------|
| C  | -1.08532900 | -0.64108200 | 3.10964800  | H | -5.52023000 | 1.52614500  | -1.87168800 |
| C  | -0.56421400 | 0.70152600  | 3.00714400  | H | -4.51423500 | 1.61120900  | -3.33374300 |
| C  | -1.69045100 | 1.64134800  | 3.05890700  | C | -5.41208100 | -1.22364300 | -1.50365800 |
| C  | -2.86192500 | 0.89253600  | 2.97851700  | H | -6.28862000 | -1.48881300 | -2.10272300 |
| C  | -2.49070900 | -0.53773400 | 2.94992100  | H | -4.91740300 | -2.14725800 | -1.19082500 |
| Rh | -1.55878900 | 0.23613700  | 1.06550500  | H | -5.75455800 | -0.70196200 | -0.60622800 |
| C  | -1.55555700 | 3.13142600  | 3.15389900  | C | -4.00917400 | -1.10850200 | -3.60393600 |
| C  | 0.86653100  | 1.08505900  | 3.24410300  | H | -4.88901500 | -1.38029800 | -4.19605000 |
| H  | 1.04825100  | 1.23771300  | 4.31709400  | H | -3.35222700 | -0.49415400 | -4.22284900 |
| H  | 1.55296000  | 0.31127800  | 2.89483400  | H | -3.47589600 | -2.02691600 | -3.34186800 |
| H  | 1.12957600  | 2.01292400  | 2.73033800  | O | -3.16465100 | -0.19794300 | -0.29973700 |
| C  | -0.26221700 | -1.88103400 | 3.29563200  | O | -2.31731600 | 0.66147500  | -2.23147200 |
| C  | -3.49309500 | -1.65546800 | 2.97765600  | H | -2.48617600 | 3.64160400  | 2.89204600  |
| H  | -3.02440800 | -2.62208000 | 2.77546500  | H | -1.28460900 | 3.44069700  | 4.17266400  |
| H  | -3.98232100 | -1.72372900 | 3.95875200  | H | -0.77305600 | 3.50741400  | 2.48850700  |
| H  | -4.27960200 | -1.50487700 | 2.23168300  | H | 0.58702100  | -1.90765900 | 2.60506300  |
| C  | -4.27747500 | 1.38969600  | 2.95906100  | H | 0.13785900  | -1.93675100 | 4.31684800  |
| H  | -4.87034400 | 0.88230600  | 2.19099800  | H | -0.85409100 | -2.78446100 | 3.12675300  |
| H  | -4.77611800 | 1.20753200  | 3.92060100  | C | 1.27654700  | -0.37252500 | 0.01241400  |
| H  | -4.32716900 | 2.46355800  | 2.76103600  | C | -0.09937100 | -0.58080000 | -0.24501900 |
| C  | 4.03976900  | 5.15541800  | -0.56782000 | C | -0.51361600 | -1.71977800 | -1.11433000 |
| C  | 2.84628200  | 4.61218700  | -0.08312900 | C | -1.42128600 | -2.69951100 | -0.68067000 |
| C  | 1.97060500  | 3.93018900  | -0.93445300 | C | 0.06314200  | -1.86545200 | -2.39019900 |
| C  | 2.31295400  | 3.79996100  | -2.28908300 | C | -1.72896400 | -3.79777300 | -1.48473600 |
| C  | 3.50035900  | 4.34354000  | -2.77527500 | H | -1.86953000 | -2.59478200 | 0.30135800  |
| C  | 4.36957300  | 5.02303300  | -1.91595100 | C | -0.26058200 | -2.94947700 | -3.20507800 |
| H  | 4.70751000  | 5.68199100  | 0.10877000  | H | 0.77675800  | -1.12149500 | -2.73199800 |
| H  | 2.59088300  | 4.72458300  | 0.96831600  | C | -1.15416300 | -3.92349200 | -2.75246400 |
| H  | 1.63600500  | 3.27019000  | -2.95292400 | H | -2.41489500 | -4.55807200 | -1.12060000 |
| H  | 3.74918800  | 4.23930100  | -3.82802200 | H | 0.19173100  | -3.03963500 | -4.18881300 |
| H  | 5.29518600  | 5.44583700  | -2.29664400 | H | -1.39805500 | -4.77551600 | -3.38115300 |
| C  | 0.66880700  | 3.34439100  | -0.41598400 | N | 2.12162100  | -1.47263400 | 0.08793300  |
| H  | 0.48373100  | 3.73364800  | 0.59503500  | N | 3.33409800  | -1.19050400 | 0.35637400  |
| H  | -0.15662400 | 3.69852900  | -1.03727000 | N | 4.16371100  | -2.25433000 | 0.49383100  |
| C  | 0.66137500  | 1.83245900  | -0.38352200 | C | 5.58572100  | -1.86969900 | 0.51388400  |
| C  | 1.64919700  | 1.00989300  | 0.05319800  | H | 6.14290600  | -2.81069200 | 0.53865400  |
| H  | 2.63149700  | 1.35558700  | 0.34406300  | C | 6.00995900  | -1.09341900 | -0.74507200 |
| C  | -1.14964100 | 1.38357100  | -1.86566000 | H | 5.46557100  | -0.14777600 | -0.80794000 |
| N  | -0.53552600 | 1.08875000  | -0.66940800 | H | 5.80323900  | -1.66651900 | -1.65354300 |
| O  | -0.78162000 | 2.16734000  | -2.70807500 | C | 5.91423500  | -1.08697100 | 1.79371100  |
| C  | -3.24914000 | 0.02997900  | -1.49943800 | H | 5.33596500  | -0.15988800 | 1.82590200  |
| C  | -4.46812500 | -0.34600400 | -2.34048500 | H | 5.66729600  | -1.67529300 | 2.68254700  |
| C  | -5.17748100 | 0.96829600  | -2.74977200 | C | 3.72198300  | -3.62412000 | 0.17413900  |
| H  | -6.05431300 | 0.73112600  | -3.36064900 | H | 2.64962600  | -3.60979600 | 0.38093400  |

|             |             |             |             |   |             |             |             |
|-------------|-------------|-------------|-------------|---|-------------|-------------|-------------|
| C           | 3.90340900  | -3.97326200 | -1.31257000 | H | 1.25165600  | 2.93897400  | -3.18193900 |
| H           | 3.39192300  | -3.23989800 | -1.94124300 | C | 1.10738800  | 1.57017700  | -1.57919600 |
| H           | 3.47705500  | -4.95977300 | -1.52696600 | C | 2.03633500  | 0.64934600  | -1.11378900 |
| H           | 4.96246600  | -3.99948700 | -1.59304200 | H | 3.10670500  | 0.78544000  | -1.10205600 |
| C           | 4.37408600  | -4.65910300 | 1.09869100  | C | -1.16321000 | 1.83031400  | -0.67651000 |
| H           | 4.25072700  | -4.37933300 | 2.14910900  | N | -0.16092600 | 1.04375500  | -1.48760300 |
| H           | 3.89951800  | -5.63439100 | 0.94695500  | O | -1.37423900 | 2.99956900  | -0.85540400 |
| H           | 5.44387400  | -4.78866300 | 0.90107300  | C | -3.69365400 | 0.15310200  | -0.97239700 |
| H           | 6.97927400  | -0.83380700 | 1.82911400  | C | -5.13079600 | -0.39354200 | -1.20204400 |
| H           | 7.08316600  | -0.87548500 | -0.71561900 | C | -6.09173000 | 0.51337300  | -0.40071900 |
| <b>17-I</b> |             |             |             | H | -7.12998000 | 0.19631000  | -0.55421700 |
| C           | -0.54999000 | -0.27188200 | 2.92708100  | H | -5.87799200 | 0.46152300  | 0.67181100  |
| C           | 0.09373500  | 0.98730400  | 2.53298800  | H | -6.00449400 | 1.55731600  | -0.71923000 |
| C           | -0.91021400 | 2.00996200  | 2.50294900  | C | -5.26332300 | -1.84685400 | -0.71283300 |
| C           | -2.17773900 | 1.36917300  | 2.69048800  | H | -6.28591300 | -2.20616100 | -0.88080300 |
| C           | -1.92636500 | -0.04100800 | 3.02207300  | H | -4.57805400 | -2.50951000 | -1.24979000 |
| Rh          | -1.32259600 | 0.55742300  | 0.82263400  | H | -5.04044900 | -1.92855700 | 0.35344600  |
| C           | -0.70054400 | 3.48244500  | 2.30437600  | C | -5.47185000 | -0.31029200 | -2.69904700 |
| C           | 1.57974400  | 1.19897000  | 2.48935100  | H | -6.50148100 | -0.64598700 | -2.87117400 |
| H           | 1.96504000  | 1.43752900  | 3.49036800  | H | -5.36536000 | 0.71244800  | -3.06596500 |
| H           | 2.09998700  | 0.30344400  | 2.14163000  | H | -4.80163000 | -0.94519400 | -3.28663100 |
| H           | 1.85928400  | 2.01775100  | 1.82196500  | O | -3.13355500 | -0.24072700 | 0.13135700  |
| C           | 0.18569600  | -1.55595400 | 3.17723900  | O | -3.18610700 | 0.92982400  | -1.78752600 |
| C           | -3.01862500 | -1.02337700 | 3.31064100  | H | -0.99618900 | 4.03584600  | 3.20376300  |
| H           | -2.62485400 | -2.01943200 | 3.52552200  | H | 0.35032800  | 3.70864500  | 2.10817700  |
| H           | -3.61725800 | -0.70339600 | 4.17195700  | H | -1.28645500 | 3.85729400  | 1.45990200  |
| H           | -3.68533800 | -1.09956500 | 2.44439600  | H | 0.87221000  | -1.78940200 | 2.35737800  |
| C           | -3.51405700 | 2.04260300  | 2.77007200  | H | 0.77896800  | -1.49384300 | 4.09931900  |
| H           | -4.28964200 | 1.42106500  | 2.31562600  | H | -0.50377900 | -2.39668900 | 3.28385500  |
| H           | -3.80151700 | 2.23104100  | 3.81360000  | C | 1.33703900  | -0.50018500 | -0.69451900 |
| H           | -3.50478700 | 3.00050200  | 2.24462600  | C | -0.06966700 | -0.30535200 | -0.92947900 |
| C           | 4.02034600  | 4.83741200  | -0.11368900 | C | -0.85745500 | -1.40826700 | -1.56750800 |
| C           | 2.79450400  | 4.29137500  | -0.49582000 | C | -1.02377200 | -2.64229200 | -0.91813300 |
| C           | 2.67115000  | 3.56554000  | -1.68896500 | C | -1.34934200 | -1.26662700 | -2.87406600 |
| C           | 3.80561900  | 3.40794400  | -2.49538000 | C | -1.64421700 | -3.70956800 | -1.56447100 |
| C           | 5.03463800  | 3.95226400  | -2.11642400 | H | -0.66964000 | -2.75739100 | 0.09962500  |
| C           | 5.14594300  | 4.66706600  | -0.92271500 | C | -1.97534600 | -2.33623500 | -3.51605400 |
| H           | 4.09491200  | 5.40297900  | 0.81104200  | H | -1.25067100 | -0.31278700 | -3.37776300 |
| H           | 1.91651600  | 4.43929400  | 0.12820700  | C | -2.12133300 | -3.56464400 | -2.86979300 |
| H           | 3.72347500  | 2.85997600  | -3.43110100 | H | -1.76484600 | -4.65516200 | -1.04218700 |
| H           | 5.90259700  | 3.82325800  | -2.75716700 | H | -2.34583000 | -2.20540600 | -4.52921000 |
| H           | 6.09999200  | 5.09547600  | -0.62906900 | H | -2.60593100 | -4.39658900 | -3.37312400 |
| C           | 1.33792200  | 2.96791400  | -2.08716500 | N | 1.84162400  | -1.71726100 | -0.26068500 |
| H           | 0.50625100  | 3.59398200  | -1.74742600 | N | 3.10919300  | -1.68970300 | -0.07407700 |

|              |             |             |             |   |             |             |             |
|--------------|-------------|-------------|-------------|---|-------------|-------------|-------------|
| N            | 3.67773300  | -2.82808600 | 0.26693100  | C | 2.32558800  | -3.22021900 | -1.36881100 |
| C            | 5.13157400  | -2.73345300 | 0.52938500  | C | 2.33535500  | -4.25084500 | -0.42145200 |
| H            | 5.43261300  | -3.74385600 | 0.82032200  | C | 3.50949600  | -4.59412100 | 0.25255100  |
| C            | 5.90197700  | -2.33991300 | -0.73800200 | C | 4.69619400  | -3.90734600 | -0.00752300 |
| H            | 5.59771400  | -1.34529100 | -1.07425900 | H | 5.62341800  | -2.35569200 | -1.18797900 |
| H            | 5.71662000  | -3.04903400 | -1.54970200 | H | 3.55629600  | -1.77802300 | -2.39753000 |
| C            | 5.42217800  | -1.78582100 | 1.70068300  | H | 1.41057300  | -4.77261700 | -0.19414300 |
| H            | 5.11616900  | -0.76632600 | 1.45203700  | H | 3.49330100  | -5.39501200 | 0.98647800  |
| H            | 4.88584600  | -2.09709700 | 2.60193800  | H | 5.60763800  | -4.16824500 | 0.52253500  |
| C            | 2.94646800  | -4.11445800 | 0.36909200  | C | 1.03556200  | -2.82082600 | -2.06510100 |
| H            | 1.92984300  | -3.86899200 | 0.06009000  | H | 1.23771700  | -2.66613400 | -3.13193000 |
| C            | 3.51624600  | -5.15225800 | -0.60749100 | H | 0.31606700  | -3.64316400 | -2.00914100 |
| H            | 3.50427700  | -4.77279400 | -1.63295000 | C | 0.38131100  | -1.53738900 | -1.53801500 |
| H            | 2.90246300  | -6.05787900 | -0.57474000 | C | 1.02104800  | -0.34146900 | -1.68172700 |
| H            | 4.54197100  | -5.44190300 | -0.35527400 | H | 1.97896500  | -0.33254800 | -2.18234400 |
| C            | 2.91691800  | -4.61989100 | 1.81777700  | C | -1.14276700 | -2.68810600 | -0.14295400 |
| H            | 2.47422100  | -3.87485300 | 2.48477300  | N | -0.86899400 | -1.62607900 | -0.97642100 |
| H            | 2.31375200  | -5.53144500 | 1.87852200  | O | -2.03680900 | -3.49349500 | -0.16592300 |
| H            | 3.91896500  | -4.86293400 | 2.18820600  | C | -0.24751000 | -1.94610300 | 1.95100600  |
| H            | 6.49378600  | -1.78047900 | 1.92339400  | C | 1.06474500  | -1.79182500 | 2.71443500  |
| H            | 6.97747800  | -2.32290700 | -0.53552200 | C | 1.59347200  | -3.17820700 | 3.13233200  |
| <b>16-II</b> |             |             |             | H | 2.54246100  | -3.06013900 | 3.66559700  |
| C            | -3.94533400 | 1.26554400  | -0.39750100 | H | 0.88859500  | -3.68517400 | 3.80011500  |
| C            | -4.03229700 | 0.42799000  | -1.57205200 | H | 1.76756600  | -3.81005500 | 2.26112000  |
| C            | -4.24553000 | -0.94753700 | -1.13781900 | C | 0.81153300  | -0.91804600 | 3.95234300  |
| C            | -4.19050600 | -0.96592900 | 0.26819700  | H | 1.74160700  | -0.80696000 | 4.51893900  |
| C            | -3.96086700 | 0.39717800  | 0.73256500  | H | 0.46072200  | 0.07667400  | 3.66478700  |
| Rh           | -2.18734800 | -0.09279900 | -0.57794400 | H | 0.05689800  | -1.36384600 | 4.60658800  |
| C            | -4.43401100 | -2.13032600 | -2.03968400 | C | 2.07422700  | -1.09260800 | 1.77375100  |
| C            | -4.10637300 | 0.91565200  | -2.98555100 | H | 3.01322000  | -0.92930400 | 2.31246300  |
| H            | -5.15140000 | 1.08098300  | -3.28094300 | H | 2.28292700  | -1.69532000 | 0.88928000  |
| H            | -3.56806100 | 1.85835700  | -3.10408400 | H | 1.69742100  | -0.12114700 | 1.43982000  |
| H            | -3.67320900 | 0.19054200  | -3.67854700 | O | -1.27937900 | -1.36668200 | 2.22087500  |
| C            | -3.98318700 | 2.76185900  | -0.38118000 | O | -0.13743600 | -2.79438700 | 0.88654000  |
| C            | -3.90721100 | 0.77905900  | 2.17756100  | H | -3.93691600 | -3.01023800 | -1.62764100 |
| H            | -3.56022700 | 1.80423800  | 2.30970500  | H | -5.50018300 | -2.35357500 | -2.17240800 |
| H            | -4.90562500 | 0.69045100  | 2.62592900  | H | -4.00907700 | -1.94042400 | -3.02840500 |
| H            | -3.23226400 | 0.11229900  | 2.71981000  | H | -3.45278600 | 3.18750800  | -1.23460400 |
| C            | -4.35946500 | -2.13787900 | 1.18107300  | H | -5.02445500 | 3.10663400  | -0.42312900 |
| H            | -3.50978300 | -2.21365200 | 1.86371700  | H | -3.52244900 | 3.17058700  | 0.51885200  |
| H            | -5.27118500 | -2.01622700 | 1.77996800  | C | 0.61869000  | 0.87716100  | -1.05311700 |
| H            | -4.42866700 | -3.07340100 | 0.62702600  | C | -0.64457200 | 1.15748600  | -0.54044700 |
| C            | 4.70427300  | -2.89019700 | -0.96471000 | C | -0.81909200 | 2.44558900  | 0.17483600  |
| C            | 3.53188000  | -2.56000000 | -1.64471300 | C | -0.81572000 | 3.68556700  | -0.48755500 |



|                |             |             |             |   |             |             |             |
|----------------|-------------|-------------|-------------|---|-------------|-------------|-------------|
| C              | -0.98355600 | 2.44069300  | 1.57075400  | C | 3.57231900  | -2.98349400 | -1.03210200 |
| C              | -0.98422100 | 4.87575900  | 0.21818300  | C | 3.82316600  | -1.74391300 | 1.95074900  |
| H              | -0.66927800 | 3.70265100  | -1.56329500 | H | 3.39509000  | -2.74067200 | 1.84046800  |
| C              | -1.14489100 | 3.63254100  | 2.27994400  | H | 4.83340200  | -1.84990300 | 2.36785900  |
| H              | -0.99138200 | 1.48501300  | 2.08714300  | H | 3.21853300  | -1.19366700 | 2.67723000  |
| C              | -1.15087200 | 4.85676600  | 1.60660300  | C | 4.48418600  | 1.26340200  | 1.70945700  |
| H              | -0.98400600 | 5.82285400  | -0.31543800 | H | 3.64307100  | 1.21141400  | 2.40613500  |
| H              | -1.26631200 | 3.60359400  | 3.35986300  | H | 5.38467000  | 0.92074000  | 2.23519200  |
| H              | -1.28136100 | 5.78487400  | 2.15588400  | H | 4.61372100  | 2.30613500  | 1.42311600  |
| N              | 1.59217200  | 1.89477900  | -0.85454500 | C | -3.64852900 | 4.15058600  | -0.52928400 |
| N              | 2.79061800  | 1.48563300  | -0.93197700 | C | -2.81037900 | 3.58676400  | -1.49356800 |
| N              | 3.72484700  | 2.41371200  | -0.72864300 | C | -1.41679900 | 3.69322800  | -1.38831900 |
| C              | 5.07027100  | 1.83779700  | -0.52875700 | C | -0.87804300 | 4.38495300  | -0.29419000 |
| H              | 5.72389600  | 2.68175300  | -0.29789300 | C | -1.71316500 | 4.95540500  | 0.66681800  |
| C              | 5.10106800  | 0.85322100  | 0.65048000  | C | -3.10123000 | 4.83778100  | 0.55580900  |
| H              | 4.47941100  | -0.01821000 | 0.42980100  | H | -4.72645800 | 4.05565100  | -0.62840700 |
| H              | 4.72426100  | 1.32198600  | 1.56399900  | H | -3.24303400 | 3.05589100  | -2.33844200 |
| C              | 5.56557600  | 1.18072100  | -1.82319600 | H | 0.20018000  | 4.45241200  | -0.18311700 |
| H              | 4.90937400  | 0.34882000  | -2.09331200 | H | -1.27774100 | 5.48888200  | 1.50731000  |
| H              | 5.56995300  | 1.89842600  | -2.64875600 | H | -3.74935100 | 5.27838300  | 1.30796300  |
| C              | 3.34645400  | 3.78354400  | -0.31205900 | C | -0.50181000 | 3.00738400  | -2.38668300 |
| H              | 2.44390300  | 3.99914000  | -0.89008800 | H | -1.03176800 | 2.84997600  | -3.33360200 |
| C              | 2.96582000  | 3.83511700  | 1.17492200  | H | 0.38051400  | 3.61918400  | -2.58870900 |
| H              | 2.17673500  | 3.11163900  | 1.38966900  | C | -0.02625800 | 1.65780000  | -1.83168600 |
| H              | 2.58611800  | 4.82967900  | 1.43108700  | C | -0.99101000 | 0.64646700  | -1.70498600 |
| H              | 3.83411400  | 3.62601300  | 1.80982200  | H | -1.99316700 | 0.85332800  | -2.06349900 |
| C              | 4.42000400  | 4.80854600  | -0.68185300 | C | 1.46717600  | 1.86577100  | 0.37445200  |
| H              | 4.73588700  | 4.69702300  | -1.72372400 | N | 1.24132900  | 1.58702600  | -1.45681100 |
| H              | 4.00939100  | 5.81504400  | -0.55531900 | O | 2.19486600  | 2.77505100  | 0.66222600  |
| H              | 5.30502100  | 4.73965600  | -0.04055600 | C | 0.12635600  | 1.10334900  | 2.17922700  |
| H              | 6.58120200  | 0.79356600  | -1.69050900 | C | -1.27456500 | 1.13947400  | 2.79549500  |
| H              | 6.12561500  | 0.51237800  | 0.83383400  | C | -1.33039900 | 2.43122200  | 3.64577000  |
| <b>TS17-II</b> |             |             |             | H | -2.30333300 | 2.49934400  | 4.14399900  |
| C              | 3.74507600  | -1.54261600 | -0.66430200 | H | -0.54856400 | 2.43284000  | 4.41173100  |
| C              | 3.97889300  | -0.45233100 | -1.60256000 | H | -1.20668700 | 3.31462700  | 3.01294900  |
| C              | 4.32585200  | 0.72374800  | -0.85003000 | C | -1.44174500 | -0.09959100 | 3.69043700  |
| C              | 4.22770800  | 0.38707900  | 0.52429000  | H | -2.41445200 | -0.06583800 | 4.19171500  |
| C              | 3.87447500  | -1.01279700 | 0.64456900  | H | -1.39364800 | -1.01826600 | 3.09629300  |
| Rh             | 2.09221800  | 0.03177500  | -0.52341300 | H | -0.65528400 | -0.14753700 | 4.44705000  |
| C              | 4.60515800  | 2.07436200  | -1.44039300 | C | -2.37410600 | 1.17802900  | 1.72110500  |
| C              | 4.02068000  | -0.57075600 | -3.09565900 | H | -3.35315400 | 1.22652900  | 2.20979600  |
| H              | 5.03421000  | -0.82475000 | -3.43514400 | H | -2.27364600 | 2.04655700  | 1.06845800  |
| H              | 3.34366100  | -1.35073800 | -3.45188600 | H | -2.35137800 | 0.28171800  | 1.09929500  |
| H              | 3.73218200  | 0.37075700  | -3.56817700 | O | 1.09243400  | 0.56856200  | 2.68934200  |

|   |             |             |             |    |             |             |             |
|---|-------------|-------------|-------------|----|-------------|-------------|-------------|
| O | 0.18389400  | 1.78948200  | 1.01542000  | C  | -3.86562900 | 0.77608600  | -1.12190800 |
| H | 5.08737700  | 2.73062700  | -0.71339700 | C  | -3.93802500 | -0.60297000 | -1.54742800 |
| H | 5.26088800  | 1.99337300  | -2.31340300 | C  | -4.12199200 | -1.42831300 | -0.38286800 |
| H | 3.66755700  | 2.55175700  | -1.75007800 | C  | -4.08661200 | -0.57732200 | 0.75103200  |
| H | 2.99790800  | -3.09903900 | -1.95436600 | C  | -3.94630900 | 0.79386100  | 0.29829900  |
| H | 4.55281500  | -3.45199500 | -1.18793200 | Rh | -1.96461000 | -0.43475200 | -0.36166100 |
| H | 3.04905600  | -3.53816600 | -0.25209500 | C  | -4.23826200 | -2.92075100 | -0.41504600 |
| C | -0.78863500 | -0.57579200 | -1.06625400 | C  | -3.95721600 | -1.11654300 | -2.95525200 |
| C | 0.45778900  | -1.01023400 | -0.53299800 | H  | -4.98399900 | -1.34551100 | -3.26923100 |
| C | 0.48571200  | -2.38125200 | 0.03518100  | H  | -3.54729800 | -0.38749800 | -3.65829600 |
| C | 0.28679700  | -3.50981500 | -0.78304100 | H  | -3.36647600 | -2.03332800 | -3.03032500 |
| C | 0.68958400  | -2.58222600 | 1.40951900  | C  | -3.81573700 | 1.96962900  | -2.02752500 |
| C | 0.30674800  | -4.79504300 | -0.24746500 | C  | -4.10736400 | 1.99193000  | 1.18491000  |
| H | 0.11195100  | -3.36324700 | -1.84449300 | H  | -3.81786700 | 2.91167100  | 0.67389200  |
| C | 0.68874500  | -3.87090300 | 1.94870400  | H  | -5.15751800 | 2.09690500  | 1.48866700  |
| H | 0.84659500  | -1.72152000 | 2.04957800  | H  | -3.50585100 | 1.89655400  | 2.09144300  |
| C | 0.50355800  | -4.98272800 | 1.12501300  | C  | -4.25673800 | -0.97480300 | 2.18532300  |
| H | 0.16313900  | -5.65270200 | -0.89942200 | H  | -3.61195800 | -0.37172900 | 2.82847600  |
| H | 0.83968200  | -4.00252800 | 3.01688100  | H  | -5.29778200 | -0.82620400 | 2.50009400  |
| H | 0.51269400  | -5.98465400 | 1.54475100  | H  | -3.99297300 | -2.02216500 | 2.33893100  |
| N | -1.86527400 | -1.48058600 | -0.85889200 | C  | 3.78289300  | -4.80298400 | -0.36942700 |
| N | -3.01766000 | -0.99360100 | -1.07619100 | C  | 2.84047500  | -4.39883800 | -1.31933700 |
| N | -4.03061600 | -1.82599100 | -0.87858800 | C  | 1.52155800  | -4.11764700 | -0.94476100 |
| C | -5.34874400 | -1.15774800 | -0.89013100 | C  | 1.16079100  | -4.24166300 | 0.40630000  |
| H | -6.07611200 | -1.93672800 | -0.65350900 | C  | 2.09906800  | -4.64693900 | 1.35414100  |
| C | -5.43772700 | -0.06179300 | 0.18219500  | C  | 3.41401500  | -4.92821000 | 0.97043700  |
| H | -4.73636600 | 0.74698000  | -0.03982700 | H  | 4.80255700  | -5.01798600 | -0.67785300 |
| H | -5.19414900 | -0.45951000 | 1.17131100  | H  | 3.13286800  | -4.29918000 | -2.36226800 |
| C | -5.65787600 | -0.61275600 | -2.28973300 | H  | 0.14902000  | -3.99242100 | 0.71450700  |
| H | -4.92049400 | 0.14525800  | -2.56767200 | H  | 1.80435500  | -4.73395400 | 2.39619000  |
| H | -5.62758000 | -1.41240500 | -3.03567100 | H  | 4.14498600  | -5.23949800 | 1.71150200  |
| C | -3.79662900 | -3.18698100 | -0.33902800 | C  | 0.50643800  | -3.60502600 | -1.95004800 |
| H | -2.86443400 | -3.50804200 | -0.81124600 | H  | 0.95794000  | -3.56066600 | -2.94887400 |
| C | -3.55895000 | -3.14662400 | 1.17760000  | H  | -0.36722200 | -4.26057300 | -2.00301700 |
| H | -2.74175900 | -2.46261100 | 1.41526900  | C  | 0.02362000  | -2.21425900 | -1.52197900 |
| H | -3.28032700 | -4.14157700 | 1.53972400  | C  | 1.05515700  | -1.20707600 | -1.43073200 |
| H | -4.46244900 | -2.82725600 | 1.70843300  | H  | 2.06641900  | -1.50491100 | -1.69025100 |
| C | -4.90822300 | -4.15944100 | -0.73643600 | C  | -1.12211400 | -1.18123100 | 1.31432900  |
| H | -5.12028300 | -4.10731900 | -1.80878000 | N  | -1.22436700 | -2.05222600 | -1.25351300 |
| H | -4.58639000 | -5.17866300 | -0.50210600 | O  | -1.39005600 | -2.23081000 | 1.82045300  |
| H | -5.83909400 | -3.98145500 | -0.18779900 | C  | -0.33209300 | 0.57903600  | 2.74135900  |
| H | -6.65188500 | -0.15467100 | -2.30886600 | C  | 0.89208600  | 1.25808800  | 3.37011400  |
| H | -6.45068200 | 0.35273500  | 0.21494000  | C  | 0.86239500  | 0.88755200  | 4.87026600  |
|   |             |             |             | H  | 1.69134700  | 1.37924500  | 5.39043000  |

18-II

|   |             |             |             |               |             |             |             |
|---|-------------|-------------|-------------|---------------|-------------|-------------|-------------|
| H | -0.07793700 | 1.20705200  | 5.32766100  | C             | 3.49340400  | 3.52746000  | 0.00691600  |
| H | 0.96551500  | -0.19369800 | 5.00975200  | H             | 2.57840800  | 3.09602400  | 0.41599900  |
| C | 0.72612000  | 2.78212700  | 3.20850200  | H             | 3.28813200  | 4.57005700  | -0.25754600 |
| H | 1.52926700  | 3.30146800  | 3.74162100  | H             | 4.26991400  | 3.51728000  | 0.77885000  |
| H | 0.77091000  | 3.07483400  | 2.15513600  | C             | 5.19244600  | 3.35257000  | -1.88286300 |
| H | -0.23486900 | 3.10950000  | 3.61287500  | H             | 5.54708200  | 2.74278900  | -2.71950100 |
| C | 2.20750800  | 0.79422200  | 2.73084900  | H             | 4.94569600  | 4.34669600  | -2.26768600 |
| H | 3.04728300  | 1.32420700  | 3.19255900  | H             | 6.01255500  | 3.47760900  | -1.16828400 |
| H | 2.36019200  | -0.27957700 | 2.86583800  | H             | 6.63254500  | -1.00047900 | -0.90653000 |
| H | 2.21946800  | 0.99518100  | 1.65797200  | H             | 6.25875300  | 0.04119700  | 1.41509800  |
| O | -1.47834300 | 0.92853300  | 2.97269400  | <b>16-III</b> |             |             |             |
| O | -0.01560400 | -0.45315200 | 1.94959700  | C             | 0.66292400  | -2.95950700 | -1.94080000 |
| H | -4.35601600 | -3.33387300 | 0.58862100  | C             | 1.59241400  | -1.97034600 | -2.41382900 |
| H | -5.09865200 | -3.23580200 | -1.01714300 | C             | 2.84198700  | -2.10992400 | -1.66054300 |
| H | -3.33175000 | -3.35277300 | -0.85707500 | C             | 2.59814600  | -3.02383000 | -0.62734300 |
| H | -3.26691800 | 1.75070700  | -2.94684200 | C             | 1.23365900  | -3.54162300 | -0.75907700 |
| H | -4.82833400 | 2.28493200  | -2.31039500 | Rh            | 0.90842700  | -1.39235300 | -0.43272600 |
| H | -3.32097900 | 2.81627900  | -1.54763700 | C             | 4.12849200  | -1.43331600 | -2.01794700 |
| C | 0.85477600  | 0.11285700  | -1.09972100 | C             | 1.42042900  | -1.09736600 | -3.61815500 |
| C | -0.45057800 | 0.65871700  | -0.83204400 | H             | 1.76929300  | -1.61677000 | -4.52004000 |
| C | -0.60745100 | 2.11922400  | -0.96043900 | H             | 0.37121800  | -0.82758400 | -3.75667100 |
| C | -0.26571800 | 2.77253000  | -2.16226800 | H             | 1.99212300  | -0.17260100 | -3.51083100 |
| C | -1.11526400 | 2.88918300  | 0.09890000  | C             | -0.62076300 | -3.33743000 | -2.61012500 |
| C | -0.45058900 | 4.14465200  | -2.30284000 | C             | 0.69177900  | -4.69619100 | 0.02669700  |
| H | 0.13786400  | 2.18859400  | -2.98299100 | H             | -0.39492200 | -4.75688200 | -0.04273500 |
| C | -1.26240700 | 4.27081400  | -0.03184500 | H             | 1.11639000  | -5.63964300 | -0.34151800 |
| H | -1.38555400 | 2.39742000  | 1.02386300  | H             | 0.94446000  | -4.60464000 | 1.08578900  |
| C | -0.94113700 | 4.90303200  | -1.23421400 | C             | 3.51203900  | -3.41908700 | 0.49059300  |
| H | -0.20212000 | 4.62751200  | -3.24387800 | H             | 3.06515300  | -3.14841700 | 1.45346200  |
| H | -1.63936900 | 4.84852900  | 0.80741100  | H             | 3.67498900  | -4.50298200 | 0.49429700  |
| H | -1.07113000 | 5.97615500  | -1.34061500 | H             | 4.48253400  | -2.92561000 | 0.41864200  |
| N | 1.92682500  | 1.04546000  | -1.09553300 | C             | -1.08203500 | 5.19502900  | 0.23066400  |
| N | 3.05407200  | 0.50746800  | -0.86325000 | C             | -1.05510400 | 4.18969300  | -0.73348100 |
| N | 4.10675700  | 1.30661900  | -0.94642500 | C             | 0.15559400  | 3.78935600  | -1.31819500 |
| C | 5.35646500  | 0.68958400  | -0.45160400 | C             | 1.34164700  | 4.40578900  | -0.90838200 |
| H | 6.14768600  | 1.40898200  | -0.67069200 | C             | 1.31803200  | 5.40499100  | 0.06924100  |
| C | 5.30743600  | 0.45419500  | 1.06420100  | C             | 0.10887600  | 5.80662300  | 0.63672700  |
| H | 4.51028900  | -0.25378300 | 1.30574200  | H             | -2.02961500 | 5.49566700  | 0.67033800  |
| H | 5.11442200  | 1.38437500  | 1.60520700  | H             | -1.97534800 | 3.68916100  | -1.02394000 |
| C | 5.65914500  | -0.60647700 | -1.21527700 | H             | 2.28900100  | 4.08030600  | -1.32297500 |
| H | 4.89858800  | -1.36349500 | -1.00793300 | H             | 2.25187500  | 5.85873200  | 0.38871600  |
| H | 5.68347700  | -0.42489300 | -2.29390300 | H             | 0.09146100  | 6.58526600  | 1.39459300  |
| C | 3.94331300  | 2.74950600  | -1.23850000 | C             | 0.16624400  | 2.64459500  | -2.32371800 |
| H | 3.12424700  | 2.78344900  | -1.96342700 | H             | -0.65598700 | 2.77171500  | -3.03426700 |

|   |             |             |             |                 |             |             |             |
|---|-------------|-------------|-------------|-----------------|-------------|-------------|-------------|
| H | 1.09882600  | 2.64291100  | -2.88597700 | N               | -5.03282900 | 1.06033600  | -0.16671800 |
| C | -0.05748400 | 1.33139500  | -1.58868400 | C               | -5.48763800 | 2.45885600  | -0.03703900 |
| C | -1.31057000 | 0.83120100  | -1.53146100 | H               | -6.53618700 | 2.40344800  | 0.26513100  |
| H | -2.06559400 | 1.35631900  | -2.10379500 | C               | -4.70574900 | 3.22087900  | 1.04586100  |
| C | 2.25465100  | 1.15983400  | -0.95404000 | H               | -3.64484500 | 3.26590100  | 0.78411500  |
| N | 0.95051300  | 0.82186100  | -0.72837000 | H               | -4.79412900 | 2.72847900  | 2.01826700  |
| O | 2.81337900  | 1.55057200  | -1.96100700 | C               | -5.41695800 | 3.17150000  | -1.39345000 |
| C | 3.90320700  | 1.84555700  | 0.66222400  | H               | -4.38175200 | 3.22413200  | -1.74048100 |
| C | 4.83566800  | 1.26999000  | 1.73206500  | H               | -6.00334400 | 2.63373700  | -2.14429200 |
| C | 3.99858100  | 0.66970800  | 2.88037900  | C               | -5.73191400 | -0.08087800 | 0.46016300  |
| H | 4.66477000  | 0.32573500  | 3.67870100  | H               | -5.31082100 | -0.95731100 | -0.03970900 |
| H | 3.31914900  | 1.41603200  | 3.30552300  | C               | -5.41060200 | -0.20575900 | 1.95675800  |
| H | 3.40906900  | -0.17933400 | 2.53048200  | H               | -4.32955600 | -0.24179700 | 2.10754900  |
| C | 5.72922200  | 2.40385900  | 2.25489000  | H               | -5.84153100 | -1.12844100 | 2.36022500  |
| H | 6.41383900  | 2.01620400  | 3.01613300  | H               | -5.82552200 | 0.63712900  | 2.52016100  |
| H | 6.31705300  | 2.84532700  | 1.44618700  | C               | -7.23699200 | -0.04263500 | 0.18451400  |
| H | 5.12885100  | 3.20230300  | 2.69912300  | H               | -7.44020500 | 0.11853100  | -0.87856600 |
| C | 5.69154100  | 0.15929400  | 1.08874500  | H               | -7.67999800 | -0.99957900 | 0.47794200  |
| H | 6.38938500  | -0.24578400 | 1.82928500  | H               | -7.74896700 | 0.73784100  | 0.75744900  |
| H | 5.05615400  | -0.65242400 | 0.72999600  | H               | -5.80594000 | 4.19139300  | -1.30935500 |
| H | 6.27382800  | 0.54288500  | 0.24462500  | H               | -5.08571300 | 4.24359800  | 1.14260800  |
| O | 3.91263500  | 2.98525600  | 0.27125200  | C               | 0.75069600  | -0.00187600 | 2.35302400  |
| O | 3.02224300  | 0.88928400  | 0.21086600  | O               | 1.13495600  | -1.02401700 | 1.74535900  |
| H | 4.91164700  | -1.64974200 | -1.29001200 | O               | 0.41419500  | 1.11177900  | 1.78424600  |
| H | 4.47301400  | -1.79570700 | -2.99475400 | H               | 0.57652900  | 1.03659200  | 0.74862000  |
| H | 4.02498100  | -0.34827700 | -2.09730400 | C               | 0.61461300  | -0.03246900 | 3.85159100  |
| H | -1.12776600 | -2.45875200 | -3.01515700 | H               | 0.69682100  | 0.97020200  | 4.27236100  |
| H | -0.41646500 | -4.02780500 | -3.43813900 | H               | -0.37803700 | -0.43223400 | 4.08869100  |
| H | -1.30216500 | -3.82858700 | -1.91570700 | H               | 1.36342800  | -0.70009500 | 4.27947000  |
| C | -1.82909400 | -0.22963800 | -0.67192300 | <b>TS17-III</b> |             |             |             |
| C | -1.11429100 | -1.26734800 | -0.15022300 | C               | 0.63545600  | -3.01801500 | -1.92306600 |
| C | -1.77761100 | -2.37757700 | 0.57089700  | C               | 1.59406100  | -2.06257000 | -2.39529500 |
| C | -2.87770500 | -3.04383300 | -0.01662300 | C               | 2.81796300  | -2.19736500 | -1.59807000 |
| C | -1.33893800 | -2.85012000 | 1.82293400  | C               | 2.53197500  | -3.07859700 | -0.54824100 |
| C | -3.50494300 | -4.11416600 | 0.61577500  | C               | 1.16124900  | -3.57487500 | -0.70514800 |
| H | -3.24169600 | -2.69770400 | -0.97677000 | Rh              | 0.87067000  | -1.43051100 | -0.42688700 |
| C | -1.97533000 | -3.91502300 | 2.46258700  | C               | 4.12435800  | -1.55142700 | -1.93780700 |
| H | -0.47460800 | -2.39300400 | 2.28396400  | C               | 1.48346600  | -1.22465600 | -3.63119800 |
| C | -3.06034500 | -4.55675000 | 1.86547400  | H               | 1.95410100  | -1.73766600 | -4.47997600 |
| H | -4.34570400 | -4.60439100 | 0.13157100  | H               | 0.43941400  | -1.03026200 | -3.88433700 |
| H | -1.61207800 | -4.24902500 | 3.43129700  | H               | 1.98560000  | -0.26395700 | -3.49358100 |
| H | -3.55043800 | -5.39010500 | 2.36085000  | C               | -0.64015200 | -3.39234200 | -2.61055200 |
| N | -3.20647300 | -0.16653500 | -0.31276300 | C               | 0.57876500  | -4.69759100 | 0.09661900  |
| N | -3.73458700 | 0.97002800  | -0.49026400 | H               | -0.50569500 | -4.74722700 | -0.00584600 |

|   |             |             |             |   |             |             |             |
|---|-------------|-------------|-------------|---|-------------|-------------|-------------|
| H | 1.00353500  | -5.65621200 | -0.22965400 | H | 4.03772400  | -0.46875800 | -2.05785700 |
| H | 0.79902900  | -4.57480600 | 1.15954400  | H | -1.13174800 | -2.51544400 | -3.03785600 |
| C | 3.40180500  | -3.44947800 | 0.61216100  | H | -0.43038100 | -4.09885900 | -3.42327200 |
| H | 2.93379900  | -3.12085200 | 1.54678200  | H | -1.33920100 | -3.86371800 | -1.91993300 |
| H | 3.53322400  | -4.53602000 | 0.66886800  | C | -1.84125300 | -0.20099800 | -0.69458600 |
| H | 4.38778800  | -2.98643200 | 0.54734200  | C | -1.15429100 | -1.25941400 | -0.18012300 |
| C | -0.88924400 | 5.22933100  | 0.22167200  | C | -1.85454900 | -2.34781300 | 0.53940400  |
| C | -0.91162300 | 4.21635200  | -0.73417600 | C | -2.94849800 | -3.00311100 | -0.06963500 |
| C | 0.27349100  | 3.78530400  | -1.34849300 | C | -1.46046200 | -2.80244200 | 1.81216800  |
| C | 1.48374000  | 4.37762800  | -0.97660900 | C | -3.61302900 | -4.05118900 | 0.56232000  |
| C | 1.50977800  | 5.38471300  | -0.00708500 | H | -3.27853600 | -2.66502800 | -1.04512800 |
| C | 0.32582400  | 5.81723000  | 0.58966400  | C | -2.13541300 | -3.84368700 | 2.45108600  |
| H | -1.81698700 | 5.55379500  | 0.68583900  | H | -0.60100100 | -2.35062100 | 2.28760200  |
| H | -1.85023800 | 3.73335300  | -0.99426900 | C | -3.21306100 | -4.47780800 | 1.83244800  |
| H | 2.41182200  | 4.02770000  | -1.41446000 | H | -4.44851100 | -4.53501700 | 0.06281300  |
| H | 2.46183500  | 5.81971600  | 0.28320700  | H | -1.80818000 | -4.16557000 | 3.43654800  |
| H | 0.34651200  | 6.60112200  | 1.34194000  | H | -3.73250100 | -5.29324800 | 2.32778800  |
| C | 0.23110000  | 2.63252000  | -2.34366200 | N | -3.21672300 | -0.10468800 | -0.33816600 |
| H | -0.58831300 | 2.78484500  | -3.05265400 | N | -3.71021300 | 1.04969600  | -0.49931700 |
| H | 1.15983600  | 2.58860400  | -2.91155300 | N | -5.00431700 | 1.17523100  | -0.16979800 |
| C | -0.04115500 | 1.33815500  | -1.59719000 | C | -5.41442400 | 2.58546700  | -0.01961200 |
| C | -1.29680500 | 0.85489400  | -1.54776200 | H | -6.46330500 | 2.55896700  | 0.28517700  |
| H | -2.03773300 | 1.38292400  | -2.13673600 | C | -4.60610600 | 3.30884600  | 1.07040400  |
| C | 2.27441200  | 1.10117700  | -0.93642800 | H | -3.54519200 | 3.32597900  | 0.80523100  |
| N | 0.94883700  | 0.82625700  | -0.69895700 | H | -4.70512600 | 2.80602500  | 2.03633600  |
| O | 2.83114700  | 1.41051400  | -1.96976500 | C | -5.32530700 | 3.31322100  | -1.36688300 |
| C | 3.94627000  | 1.80124100  | 0.64858600  | H | -4.28982300 | 3.33789000  | -1.71636700 |
| C | 4.82253500  | 1.23522200  | 1.76757400  | H | -5.93033500 | 2.80395900  | -2.12280300 |
| C | 3.93581500  | 0.67108500  | 2.89626100  | C | -5.73226100 | 0.04812000  | 0.45046500  |
| H | 4.56937200  | 0.33156300  | 3.72251400  | H | -5.34588500 | -0.83436800 | -0.06661200 |
| H | 3.25412400  | 1.43531900  | 3.28304300  | C | -5.39793800 | -0.10899200 | 1.94132100  |
| H | 3.34328800  | -0.17416300 | 2.54231600  | H | -4.31708300 | -0.18066700 | 2.07981700  |
| C | 5.71833800  | 2.36409900  | 2.29734100  | H | -5.85255700 | -1.02429800 | 2.33546800  |
| H | 6.36894900  | 1.97987100  | 3.08935200  | H | -5.78099800 | 0.73723300  | 2.52200800  |
| H | 6.34126500  | 2.77905100  | 1.50107800  | C | -7.23852500 | 0.13870000  | 0.19435300  |
| H | 5.11745800  | 3.18104000  | 2.70630700  | H | -7.44983500 | 0.32277500  | -0.86344000 |
| C | 5.68037200  | 0.09728400  | 1.17379200  | H | -7.70833400 | -0.80802500 | 0.47902500  |
| H | 6.34188400  | -0.30702600 | 1.94717800  | H | -7.71772700 | 0.92601800  | 0.78592700  |
| H | 5.04304700  | -0.70950400 | 0.80666500  | H | -5.68185500 | 4.34363600  | -1.26842400 |
| H | 6.30115900  | 0.45479600  | 0.34578300  | H | -4.95522500 | 4.34092300  | 1.18283000  |
| O | 4.02709900  | 2.90873900  | 0.18413300  | C | 0.70213400  | -0.00422000 | 2.29703500  |
| O | 3.01866200  | 0.86527300  | 0.23602400  | O | 1.07032900  | -1.06404700 | 1.71144900  |
| H | 4.88235200  | -1.75357900 | -1.17975900 | O | 0.40967300  | 1.09089900  | 1.71421900  |
| H | 4.49215400  | -1.95177100 | -2.89109900 | H | 0.63261100  | 0.99678700  | 0.54692600  |

|               |             |             |             |   |             |             |             |
|---------------|-------------|-------------|-------------|---|-------------|-------------|-------------|
| C             | 0.56269900  | -0.04468000 | 3.80018500  | O | 2.84032400  | 1.31686600  | -1.94360300 |
| H             | 0.65125200  | 0.95633900  | 4.22376100  | C | 3.98665900  | 1.77821700  | 0.66097100  |
| H             | -0.43309600 | -0.43779800 | 4.03507300  | C | 4.81615100  | 1.20330800  | 1.80719500  |
| H             | 1.30467200  | -0.71876600 | 4.23120400  | C | 3.89581200  | 0.63442500  | 2.90515700  |
| <b>18-III</b> |             |             |             |   |             |             |             |
| C             | 0.59558200  | -3.04191400 | -1.95730600 | H | 4.50594200  | 0.29481500  | 3.74867500  |
| C             | 1.58190100  | -2.11248700 | -2.40974300 | H | 3.19668200  | 1.39244000  | 3.27073600  |
| C             | 2.78090400  | -2.25861300 | -1.57489400 | H | 3.31716500  | -0.21094200 | 2.52987300  |
| C             | 2.45579100  | -3.12751900 | -0.52691200 | C | 5.70667800  | 2.32248000  | 2.36628700  |
| C             | 1.07812800  | -3.59658800 | -0.71572200 | H | 6.33523300  | 1.92687500  | 3.17016000  |
| Rh            | 0.82423600  | -1.46724000 | -0.43879800 | H | 6.35082600  | 2.74021900  | 1.58872100  |
| C             | 4.10612400  | -1.63446800 | -1.88078900 | H | 5.10115400  | 3.13882300  | 2.77024700  |
| C             | 1.51642500  | -1.27331800 | -3.64828200 | C | 5.68185800  | 0.06363400  | 1.22401200  |
| H             | 1.97519400  | -1.80299700 | -4.49321500 | H | 6.31691600  | -0.35281200 | 2.01276600  |
| H             | 0.48261800  | -1.03963100 | -3.91090200 | H | 5.04904700  | -0.73597800 | 0.83269800  |
| H             | 2.05112200  | -0.33150700 | -3.50582800 | H | 6.32902200  | 0.42396800  | 0.41778100  |
| C             | -0.66808200 | -3.40794000 | -2.67041400 | O | 4.14349000  | 2.84638000  | 0.13285700  |
| C             | 0.45689000  | -4.70702600 | 0.07276500  | O | 2.99102800  | 0.88429600  | 0.29033800  |
| H             | -0.62490500 | -4.74079900 | -0.05890100 | H | 4.84340700  | -1.85925200 | -1.10866800 |
| H             | 0.87642900  | -5.67175700 | -0.24211900 | H | 4.48653200  | -2.03281500 | -2.82985900 |
| H             | 0.65216600  | -4.58439700 | 1.14029000  | H | 4.04341300  | -0.54955000 | -1.99310200 |
| C             | 3.27896800  | -3.48153900 | 0.67175700  | H | -1.09433500 | -2.54835000 | -3.19235200 |
| H             | 2.80663900  | -3.06789800 | 1.57080300  | H | -0.46149900 | -4.18916600 | -3.41268400 |
| H             | 3.34748400  | -4.56805500 | 0.79379100  | H | -1.41957100 | -3.78710900 | -1.97761400 |
| H             | 4.29069700  | -3.07722000 | 0.60402700  | C | -1.85856500 | -0.16312200 | -0.70507900 |
| C             | -0.69933900 | 5.28794400  | 0.19911300  | C | -1.19781900 | -1.24725200 | -0.20981400 |
| C             | -0.77444300 | 4.26604100  | -0.74415100 | C | -1.93516400 | -2.32401600 | 0.48987700  |
| C             | 0.38261800  | 3.79522100  | -1.38213900 | C | -3.03797400 | -2.94290200 | -0.13960500 |
| C             | 1.61823400  | 4.35574100  | -1.04640300 | C | -1.56744500 | -2.79920200 | 1.76245100  |
| C             | 1.69710100  | 5.37198400  | -0.08927300 | C | -3.73856400 | -3.97825100 | 0.47463900  |
| C             | 0.54084100  | 5.84427600  | 0.53074200  | H | -3.34750500 | -2.58529500 | -1.11514400 |
| H             | -1.60528100 | 5.64304000  | 0.68309600  | C | -2.27990600 | -3.82551300 | 2.38404700  |
| H             | -1.73260500 | 3.80737700  | -0.97553600 | H | -0.69802800 | -2.37735300 | 2.24669300  |
| H             | 2.52509200  | 3.97619000  | -1.50387700 | C | -3.36678600 | -4.42464200 | 1.74639000  |
| H             | 2.66790800  | 5.78240800  | 0.17305000  | H | -4.58054700 | -4.43499300 | -0.03917200 |
| H             | 0.60234800  | 6.63433200  | 1.27413300  | H | -1.97431000 | -4.16447900 | 3.37068900  |
| C             | 0.28158700  | 2.63375500  | -2.36288500 | H | -3.91476600 | -5.22920800 | 2.22864700  |
| H             | -0.53630800 | 2.80992100  | -3.06814300 | N | -3.22828700 | -0.02969300 | -0.34174200 |
| H             | 1.20256300  | 2.54397800  | -2.93917500 | N | -3.68474700 | 1.14199200  | -0.48644200 |
| C             | -0.03906000 | 1.36283500  | -1.60241600 | N | -4.97105800 | 1.30699800  | -0.14299200 |
| C             | -1.29392400 | 0.88873300  | -1.55326100 | C | -5.33127500 | 2.72882800  | 0.02501100  |
| H             | -2.02492600 | 1.41738700  | -2.15525400 | H | -6.37757800 | 2.73502600  | 0.33936600  |
| C             | 2.28776200  | 1.08013600  | -0.89256500 | C | -4.48886800 | 3.41451900  | 1.11345600  |
| N             | 0.94005000  | 0.84518000  | -0.67567800 | H | -3.43048200 | 3.39878200  | 0.83833700  |
|               |             |             |             | H | -4.59455600 | 2.90607600  | 2.07558600  |

|               |             |             |             |   |             |             |             |
|---------------|-------------|-------------|-------------|---|-------------|-------------|-------------|
| C             | -5.23062700 | 3.46565700  | -1.31656200 | C | 5.72435800  | -3.12462500 | -0.77197700 |
| H             | -4.19810200 | 3.45933300  | -1.67572300 | C | 4.35531000  | -3.21255500 | -1.02659900 |
| H             | -5.85909400 | 2.98360200  | -2.07123300 | C | 3.43391100  | -3.27823300 | 0.02573500  |
| C             | -5.72636900 | 0.19891200  | 0.47984000  | C | 3.91257600  | -3.24677900 | 1.34224900  |
| H             | -5.38369600 | -0.69063600 | -0.05583100 | C | 5.28100700  | -3.14889800 | 1.60042000  |
| C             | -5.36793000 | 0.01049300  | 1.96158700  | C | 6.19135700  | -3.08960800 | 0.54342100  |
| H             | -4.28798500 | -0.10113300 | 2.07838500  | H | 6.42444100  | -3.07570300 | -1.60093500 |
| H             | -5.84727200 | -0.89348700 | 2.35257900  | H | 3.99525700  | -3.22276600 | -2.05226100 |
| H             | -5.70957300 | 0.86151500  | 2.56076800  | H | 3.20590500  | -3.29368500 | 2.16630900  |
| C             | -7.23327300 | 0.34756500  | 0.25708300  | H | 5.63530300  | -3.12218800 | 2.62692300  |
| H             | -7.46042700 | 0.55453700  | -0.79321600 | H | 7.25643200  | -3.01668900 | 0.74315400  |
| H             | -7.73107600 | -0.58560700 | 0.53881100  | C | 1.94114800  | -3.30661300 | -0.25671300 |
| H             | -7.67041600 | 1.14282800  | 0.87014200  | H | 1.75198600  | -3.73292400 | -1.24650600 |
| H             | -5.55190400 | 4.50637200  | -1.20568300 | H | 1.43326100  | -3.94184700 | 0.48011100  |
| H             | -4.80250000 | 4.45647300  | 1.23891400  | C | 1.35368200  | -1.91982700 | -0.19683400 |
| C             | 0.69051800  | -0.14097100 | 2.33590800  | C | 0.86841100  | -1.21980400 | -1.22145500 |
| O             | 1.05203800  | -1.18169400 | 1.66708600  | H | 0.88773300  | -1.68317700 | -2.20673700 |
| O             | 0.36746400  | 0.96455800  | 1.85256400  | C | 0.20948500  | -1.01465000 | 1.69065500  |
| H             | 0.65734500  | 0.96590800  | 0.36902200  | N | 1.38020400  | -1.28831400 | 1.09492800  |
| C             | 0.64030600  | -0.33267200 | 3.84205700  | O | -0.86017400 | -1.55535600 | 1.43834100  |
| H             | 0.71593400  | 0.62947000  | 4.35045600  | C | 1.18816800  | 0.91309700  | 2.85791900  |
| H             | -0.32449200 | -0.78624400 | 4.09667000  | C | 0.61328900  | 2.14866100  | 3.53069900  |
| H             | 1.42924500  | -1.01030400 | 4.17445800  | C | 1.76309900  | 3.09023000  | 3.91645200  |
| <b>19-III</b> |             |             |             | H | 1.35294300  | 3.99619400  | 4.37271200  |
| C             | -2.74342000 | -1.43277700 | -2.27514800 | H | 2.43923700  | 2.61754700  | 4.63543000  |
| C             | -2.57733000 | -2.56792600 | -1.43352100 | H | 2.35051200  | 3.37800000  | 3.04172400  |
| C             | -3.68143000 | -2.60571000 | -0.46495700 | C | -0.20641600 | 1.75135500  | 4.77569100  |
| C             | -4.45552400 | -1.45881200 | -0.65564600 | H | -0.62891600 | 2.65400300  | 5.22801700  |
| C             | -3.83100100 | -0.65193600 | -1.71359300 | H | -1.02544400 | 1.07989400  | 4.51501600  |
| Rh            | -2.29769500 | -0.70979300 | -0.25728300 | H | 0.42311300  | 1.26047200  | 5.52558800  |
| C             | -3.87877400 | -3.64497900 | 0.59590400  | C | -0.30991900 | 2.81008100  | 2.47580200  |
| C             | -1.55278100 | -3.65263700 | -1.56000900 | H | -0.76281300 | 3.70782500  | 2.90965200  |
| H             | -2.03427000 | -4.60160000 | -1.82440300 | H | 0.25097500  | 3.10980200  | 1.58524300  |
| H             | -0.81187000 | -3.41987900 | -2.32566400 | H | -1.10068700 | 2.12517200  | 2.16387300  |
| H             | -1.02553800 | -3.79198800 | -0.61215000 | O | 2.33070500  | 0.78379600  | 2.47161400  |
| C             | -1.99161800 | -1.09897100 | -3.52664500 | O | 0.21257200  | -0.04969900 | 2.69049600  |
| C             | -4.40939900 | 0.59808700  | -2.30132300 | H | -3.95878800 | -3.15378800 | 1.56920400  |
| H             | -3.64121000 | 1.19445800  | -2.79675200 | H | -4.79035300 | -4.22662900 | 0.41421800  |
| H             | -5.19049900 | 0.35507900  | -3.03370800 | H | -3.03764100 | -4.34079200 | 0.62852600  |
| H             | -4.85405500 | 1.22317700  | -1.52385000 | H | -1.00343100 | -1.56185200 | -3.54206600 |
| C             | -5.67862600 | -1.05682000 | 0.10363900  | H | -2.54721300 | -1.45944400 | -4.40157000 |
| H             | -5.67670900 | 0.01928100  | 0.29602400  | H | -1.85890600 | -0.02084100 | -3.63138900 |
| H             | -6.57744000 | -1.28877200 | -0.48258800 | C | 0.41539100  | 0.20134900  | -1.15829300 |
| H             | -5.72742400 | -1.56351600 | 1.06622600  | C | -0.87182400 | 0.60226300  | -0.94860100 |

|                 |             |             |             |    |             |             |             |
|-----------------|-------------|-------------|-------------|----|-------------|-------------|-------------|
| C               | -1.30333300 | 1.95891600  | -1.36086500 | C  | 2.37206400  | -1.94005000 | -2.40880400 |
| C               | -0.93890500 | 2.42293600  | -2.64618900 | C  | 3.70314400  | -1.40353700 | -2.16870000 |
| C               | -2.14869000 | 2.78353500  | -0.59250600 | C  | 4.09806700  | -1.80604500 | -0.86480200 |
| C               | -1.38142800 | 3.65215400  | -3.13091400 | C  | 3.02121300  | -2.57724300 | -0.27258000 |
| H               | -0.29349500 | 1.80559800  | -3.26189400 | Rh | 2.24359000  | -0.56470500 | -0.67019500 |
| C               | -2.57920900 | 4.01920300  | -1.07515900 | C  | 4.50222200  | -0.55717800 | -3.11081600 |
| H               | -2.47797300 | 2.43086800  | 0.37466600  | C  | 1.58709700  | -1.74885100 | -3.66990100 |
| C               | -2.20241300 | 4.46355600  | -2.34424500 | H  | 1.98559100  | -2.37177800 | -4.47987700 |
| H               | -1.08399300 | 3.97599400  | -4.12507800 | H  | 0.53605300  | -2.00351300 | -3.52353300 |
| H               | -3.22307700 | 4.63692100  | -0.45387400 | H  | 1.62789400  | -0.70406900 | -3.98949200 |
| H               | -2.54808200 | 5.42339300  | -2.71820800 | C  | 0.78957400  | -3.59622800 | -1.13509300 |
| N               | 1.40736300  | 1.19666300  | -1.33273900 | C  | 3.06985600  | -3.30350400 | 1.03821000  |
| N               | 2.59003100  | 0.74402000  | -1.40643400 | H  | 2.07412600  | -3.38408200 | 1.48128800  |
| N               | 3.55881900  | 1.66980800  | -1.51194700 | H  | 3.46947700  | -4.31858400 | 0.91221300  |
| C               | 4.89458000  | 1.12271900  | -1.19570800 | H  | 3.71040400  | -2.78259100 | 1.75390900  |
| H               | 5.56087300  | 1.98823000  | -1.14783800 | C  | 5.39974700  | -1.50081100 | -0.19369500 |
| C               | 4.93104500  | 0.40738300  | 0.16451100  | H  | 5.24535000  | -1.29577100 | 0.86909500  |
| H               | 4.35620500  | -0.52015400 | 0.12100300  | H  | 6.07531300  | -2.36154400 | -0.27822300 |
| H               | 4.51511700  | 1.03367700  | 0.95724300  | H  | 5.87041800  | -0.62300200 | -0.63410100 |
| C               | 5.36631700  | 0.20660400  | -2.33074500 | C  | -5.23199400 | 1.96401600  | -0.99231300 |
| H               | 4.67418200  | -0.63264400 | -2.43512400 | C  | -4.13405900 | 1.30093800  | -1.53868300 |
| H               | 5.40301000  | 0.74992200  | -3.27973700 | C  | -3.48463000 | 1.81461000  | -2.67146500 |
| C               | 3.24841400  | 3.10511200  | -1.35528900 | C  | -3.94558800 | 3.00990300  | -3.23232500 |
| H               | 2.24466800  | 3.21223400  | -1.77181200 | C  | -5.04548400 | 3.67496600  | -2.68441900 |
| C               | 3.18985100  | 3.50630400  | 0.12640700  | C  | -5.69272200 | 3.15276200  | -1.56415800 |
| H               | 2.52823800  | 2.82937400  | 0.67109000  | H  | -5.72587600 | 1.55501700  | -0.11546600 |
| H               | 2.81090300  | 4.52856500  | 0.23263700  | H  | -3.76090300 | 0.38898900  | -1.08015500 |
| H               | 4.18253700  | 3.46289000  | 0.58857200  | H  | -3.44135200 | 3.42315200  | -4.10242600 |
| C               | 4.20484200  | 3.98015800  | -2.16898000 | H  | -5.39059100 | 4.60350200  | -3.13034300 |
| H               | 4.24900000  | 3.64723400  | -3.21022200 | H  | -6.54493000 | 3.67155600  | -1.13482900 |
| H               | 3.85070500  | 5.01596700  | -2.15332100 | C  | -2.29598200 | 1.07023000  | -3.27216900 |
| H               | 5.22221300  | 3.98005700  | -1.76335700 | H  | -2.64603700 | 0.16511600  | -3.78137500 |
| H               | 6.36140600  | -0.19548800 | -2.11384700 | H  | -1.80707400 | 1.70122200  | -4.02199600 |
| H               | 5.96080200  | 0.14465900  | 0.42633200  | C  | -1.30968800 | 0.67470200  | -2.20368100 |
| C               | -3.39352700 | 0.14486600  | 2.32995700  | C  | -1.18704100 | -0.60711800 | -1.75459300 |
| O               | -2.73988300 | 0.62502600  | 1.30758400  | H  | -1.75003200 | -1.37470300 | -2.27481500 |
| O               | -3.78910800 | -1.01236400 | 2.47379700  | C  | 0.50860400  | 1.53246600  | -0.90001800 |
| H               | 2.18632000  | -0.72656400 | 1.36379100  | N  | -0.71028500 | 1.72967600  | -1.53426000 |
| C               | -3.71282000 | 1.18808100  | 3.40177600  | O  | 1.50544500  | 1.15622300  | -1.59890500 |
| H               | -3.51836600 | 0.76456800  | 4.39041900  | C  | -0.09322200 | 3.17197600  | 0.84873800  |
| H               | -3.15043300 | 2.11361500  | 3.27139900  | C  | 0.60803700  | 3.94807800  | 1.96029300  |
| H               | -4.78333300 | 1.41554000  | 3.35025800  | C  | -0.44779800 | 4.71718600  | 2.76606000  |
| <b>TS20-III</b> |             |             |             | H  | 0.04094400  | 5.27469300  | 3.57136600  |
| C               | 1.99379500  | -2.71955100 | -1.27192800 | H  | -0.99751000 | 5.42208300  | 2.13600600  |



|   |             |             |             |               |             |             |             |
|---|-------------|-------------|-------------|---------------|-------------|-------------|-------------|
| H | -1.17252600 | 4.02920600  | 3.20988300  | H             | -2.05549400 | -2.26048500 | 2.91710500  |
| C | 1.60214900  | 4.92899900  | 1.29572900  | H             | -2.05293400 | -3.91074600 | 3.56553900  |
| H | 2.11503500  | 5.50482700  | 2.07306900  | H             | -3.57498700 | -3.01337000 | 3.46295700  |
| H | 2.34865500  | 4.39298500  | 0.70597900  | C             | -3.61559300 | -5.08259300 | 1.56154500  |
| H | 1.08453000  | 5.63528200  | 0.63723500  | H             | -3.83764300 | -5.42334700 | 0.54566500  |
| C | 1.37009600  | 2.96155900  | 2.87113200  | H             | -3.00652600 | -5.84757600 | 2.05257800  |
| H | 1.98754800  | 3.52817100  | 3.57684600  | H             | -4.55493900 | -5.01343800 | 2.11965500  |
| H | 0.67566700  | 2.34393900  | 3.44440900  | H             | -6.54240100 | -2.28236400 | -0.77217800 |
| H | 2.00898800  | 2.29710600  | 2.28934700  | H             | -6.31836600 | -1.03445300 | 1.46619000  |
| O | -1.29180400 | 3.19058900  | 0.63104200  | C             | 4.10040900  | 1.41750900  | 0.45156100  |
| O | 0.81223900  | 2.49589800  | 0.08864900  | O             | 3.07457900  | 0.69103900  | 0.79633400  |
| H | 4.90566900  | 0.30353300  | -2.57304900 | O             | 4.62623100  | 1.47364800  | -0.66180700 |
| H | 5.32607400  | -1.13347000 | -3.55026400 | H             | -1.33011900 | 2.42834500  | -1.12110700 |
| H | 3.87933700  | -0.18449100 | -3.92705200 | C             | 4.66463400  | 2.25521100  | 1.60073300  |
| H | 0.00960200  | -3.33243100 | -1.85123100 | H             | 4.23569900  | 3.26130400  | 1.55814800  |
| H | 1.07601000  | -4.63995200 | -1.31651300 | H             | 4.42161100  | 1.82341700  | 2.57382500  |
| H | 0.35431000  | -3.52795100 | -0.13627300 | H             | 5.74644900  | 2.34660800  | 1.47990100  |
| C | -0.73349900 | -0.89618800 | -0.41509100 |               |             |             |             |
| C | 0.30526200  | -0.25522000 | 0.25712200  | <b>21-III</b> |             |             |             |
| C | 0.17373000  | -0.17396400 | 1.73009500  | C             | -2.17880400 | -1.41157800 | -2.17084200 |
| C | 1.17181300  | -0.59993800 | 2.62365800  | C             | -1.04717800 | -1.78790900 | -2.94708400 |
| C | -1.02246500 | 0.33936500  | 2.27842900  | C             | -0.62241000 | -3.10706400 | -2.51879600 |
| C | 0.96398400  | -0.56004300 | 4.00160500  | C             | -1.51137100 | -3.52788300 | -1.46376100 |
| H | 2.11582400  | -0.94443700 | 2.22579700  | C             | -2.44177100 | -2.46971400 | -1.20817000 |
| C | -1.22568700 | 0.39162400  | 3.65611300  | Rh            | -0.38625900 | -1.73499600 | -0.83587200 |
| H | -1.79061400 | 0.70874200  | 1.60694300  | C             | 0.49341400  | -3.90848800 | -3.11082600 |
| C | -0.23451700 | -0.07004900 | 4.52719300  | C             | -0.35602800 | -0.96613800 | -3.99198100 |
| H | 1.74771300  | -0.90510400 | 4.67079800  | H             | -0.40095400 | -1.45460900 | -4.97160100 |
| H | -2.15581200 | 0.79449600  | 4.04821800  | H             | -0.80688700 | 0.02466300  | -4.07759600 |
| H | -0.38838600 | -0.03383900 | 5.60206200  | H             | 0.69483900  | -0.83205100 | -3.71470000 |
| N | -1.49420900 | -1.84836800 | 0.31238900  | C             | -3.03456100 | -0.20525000 | -2.39126800 |
| N | -2.74290700 | -1.82026700 | 0.06762200  | C             | -3.56427700 | -2.46867200 | -0.21575900 |
| N | -3.46647600 | -2.76732300 | 0.65042800  | H             | -3.67562700 | -1.47760400 | 0.23157400  |
| C | -4.91756100 | -2.48201000 | 0.64693400  | H             | -4.51797600 | -2.74001000 | -0.68690300 |
| H | -5.38499600 | -3.33550400 | 1.14202300  | H             | -3.37644400 | -3.17886200 | 0.59269000  |
| C | -5.23839600 | -1.21363400 | 1.45300100  | C             | -1.43503800 | -4.83964400 | -0.74787100 |
| H | -4.74716400 | -0.34680300 | 1.00332200  | H             | -1.78293000 | -4.74668300 | 0.28349300  |
| H | -4.88946300 | -1.30104200 | 2.48525900  | H             | -2.06280700 | -5.58268000 | -1.25526800 |
| C | -5.45513500 | -2.40682600 | -0.78699800 | H             | -0.40554100 | -5.19900300 | -0.72562500 |
| H | -5.02156500 | -1.55842500 | -1.32115100 | C             | 2.84848900  | 5.97657200  | -0.15201700 |
| H | -5.21738500 | -3.32169300 | -1.33767500 | C             | 1.91926000  | 5.17393300  | -0.81198700 |
| C | -2.84016800 | -3.76291600 | 1.55151100  | C             | 2.34299700  | 4.16271600  | -1.68430900 |
| H | -1.85951900 | -3.94394400 | 1.10406300  | C             | 3.71499300  | 3.96657300  | -1.87884700 |
| C | -2.61878500 | -3.19463800 | 2.96014100  | C             | 4.64813500  | 4.76537600  | -1.21371000 |
|   |             |             |             | C             | 4.21701500  | 5.77308400  | -0.35071000 |

|   |             |             |             |                    |             |             |             |
|---|-------------|-------------|-------------|--------------------|-------------|-------------|-------------|
| H | 2.50634100  | 6.75907000  | 0.51947500  | H                  | 1.48883800  | 1.42743500  | 2.40079800  |
| H | 0.85502000  | 5.32317700  | -0.64633600 | C                  | -0.39669700 | -0.13042200 | 4.76326100  |
| H | 4.05725600  | 3.18081400  | -2.54780100 | H                  | -1.95889300 | -1.55687200 | 4.33510500  |
| H | 5.70942000  | 4.59677600  | -1.37057100 | H                  | 1.20744400  | 1.30852600  | 4.85239700  |
| H | 4.94135000  | 6.39633700  | 0.16560800  | H                  | -0.52546500 | -0.18322400 | 5.84091900  |
| C | 1.32342300  | 3.25581100  | -2.34752200 | N                  | -2.13137100 | 1.03806100  | 0.45358200  |
| H | 0.45767100  | 3.83197300  | -2.68627800 | N                  | -2.89858700 | 1.97687900  | 0.06598200  |
| H | 1.76716800  | 2.78377800  | -3.23344300 | N                  | -4.10118600 | 1.98590100  | 0.61393600  |
| C | 0.84646900  | 2.15600500  | -1.42225900 | C                  | -4.92625900 | 3.15409000  | 0.24603700  |
| C | -0.49630200 | 1.91090900  | -1.19684300 | H                  | -5.84227000 | 3.05748800  | 0.83506900  |
| H | -1.24409700 | 2.52875200  | -1.67322100 | C                  | -4.23571100 | 4.46894800  | 0.63180400  |
| C | 1.45352500  | 0.12782700  | -0.24121100 | H                  | -3.30384100 | 4.58338800  | 0.07211100  |
| N | 1.79062000  | 1.44702000  | -0.78998600 | H                  | -3.99916800 | 4.48630100  | 1.69941700  |
| O | 1.41304100  | -0.80301400 | -1.20169200 | C                  | -5.29188300 | 3.10181600  | -1.24176700 |
| C | 3.77875400  | -0.19941000 | 0.44430100  | H                  | -4.38671800 | 3.16246900  | -1.85236600 |
| C | 4.60889800  | -1.06993100 | 1.38945600  | H                  | -5.80721900 | 2.16726400  | -1.48259600 |
| C | 5.98259100  | -0.40845800 | 1.59324900  | C                  | -4.49255000 | 1.06266400  | 1.70602800  |
| H | 6.62785500  | -1.06666700 | 2.18428900  | H                  | -3.71654400 | 0.29708400  | 1.70722700  |
| H | 6.46389300  | -0.21113400 | 0.63278500  | C                  | -4.44366200 | 1.77765800  | 3.06173400  |
| H | 5.88754300  | 0.54331500  | 2.12748100  | H                  | -3.44279400 | 2.17874500  | 3.24221200  |
| C | 4.77975200  | -2.42213200 | 0.65241900  | H                  | -4.67330600 | 1.06891800  | 3.86347000  |
| H | 5.34914200  | -3.11188100 | 1.28560700  | H                  | -5.17008500 | 2.59608800  | 3.11683800  |
| H | 3.81780700  | -2.88242700 | 0.41196800  | C                  | -5.84464500 | 0.40613000  | 1.41355400  |
| H | 5.32900300  | -2.28012000 | -0.28311200 | H                  | -5.83478900 | -0.09395200 | 0.44043200  |
| C | 3.90417300  | -1.28182600 | 2.73960100  | H                  | -6.05810600 | -0.34445300 | 2.18087900  |
| H | 4.51763200  | -1.93051500 | 3.37428800  | H                  | -6.66941400 | 1.12655800  | 1.42224100  |
| H | 3.75629400  | -0.33221600 | 3.26384200  | H                  | -5.94602200 | 3.93874000  | -1.50520700 |
| H | 2.92342200  | -1.73873900 | 2.60961000  | H                  | -4.88701600 | 5.31914400  | 0.40629300  |
| O | 4.25804900  | 0.40572000  | -0.50333700 | C                  | 1.24849600  | -3.62084800 | 0.81180200  |
| O | 2.47330200  | -0.20510000 | 0.76117800  | O                  | 0.40669200  | -2.63496900 | 0.85321600  |
| H | 1.11444100  | -4.32173300 | -2.31309700 | O                  | 1.73107900  | -4.14905000 | -0.19461500 |
| H | 0.09635600  | -4.72417500 | -3.72865500 | H                  | 2.78132400  | 1.57029200  | -0.98610500 |
| H | 1.12675800  | -3.28043000 | -3.74119700 | C                  | 1.60440300  | -4.15829100 | 2.19865500  |
| H | -2.43729700 | 0.68232000  | -2.60903300 | H                  | 2.68948900  | -4.25893800 | 2.28068000  |
| H | -3.69825100 | -0.38270100 | -3.24682000 | H                  | 1.22386400  | -3.51658300 | 2.99490100  |
| H | -3.65760300 | 0.01366700  | -1.52476000 | H                  | 1.17402900  | -5.16038700 | 2.30246100  |
| C | -0.86407300 | 1.03444800  | -0.14229100 | <b>11-free-cat</b> |             |             |             |
| C | 0.08128100  | 0.17296300  | 0.47938900  | N                  | 1.68886200  | -0.65841200 | -1.12965700 |
| C | -0.05399300 | -0.00724000 | 1.96484900  | O                  | 2.15711600  | -1.92638800 | -0.72560000 |
| C | -1.02690100 | -0.84158000 | 2.53605000  | C                  | 2.24295000  | 0.38283700  | -0.40842800 |
| C | 0.73814000  | 0.76914500  | 2.82366400  | C                  | 1.61829900  | 1.71857000  | -0.66840700 |
| C | -1.20104300 | -0.89905500 | 3.91702500  | C                  | 0.34640500  | 2.03729600  | -0.36520300 |
| H | -1.63584800 | -1.45592300 | 1.88535600  | O                  | 3.25496900  | 0.24282100  | 0.26677500  |
| C | 0.57557000  | 0.70196100  | 4.20902200  | C                  | -0.42261200 | 0.31796400  | 1.24887500  |

|   |             |             |             |                      |             |             |             |
|---|-------------|-------------|-------------|----------------------|-------------|-------------|-------------|
| C | -0.69808900 | 1.22339000  | 0.27254000  | C                    | -5.87576500 | 2.49972400  | -0.37838500 |
| C | 3.40055500  | -2.26942700 | -1.26828600 | H                    | -5.96420100 | 2.03674000  | 0.60881800  |
| O | 3.93098900  | -1.62358800 | -2.12560900 | H                    | -6.15028000 | 3.55522700  | -0.28665200 |
| C | 3.91962700  | -3.54348100 | -0.60283600 | H                    | -6.60517700 | 2.03039200  | -1.04639300 |
| C | 5.39568200  | -3.70624800 | -1.00112600 | H                    | -5.75742300 | -1.91403500 | -0.83771800 |
| H | 5.79195500  | -4.63114800 | -0.57058500 | H                    | -4.55120400 | -1.59533400 | -3.06586600 |
| H | 5.99362800  | -2.86716800 | -0.63503800 | H                    | 0.01280600  | 3.04251500  | -0.62271200 |
| H | 5.50779500  | -3.74682500 | -2.08713500 | C                    | 2.58451700  | 2.76240900  | -1.22073600 |
| C | 3.79077100  | -3.42343000 | 0.93174000  | H                    | 2.12206800  | 3.24391200  | -2.08950200 |
| H | 4.30166700  | -4.26782900 | 1.40534700  | H                    | 3.48649100  | 2.25704600  | -1.58029700 |
| H | 2.74684400  | -3.43746800 | 1.25459400  | C                    | 2.96707300  | 3.82182000  | -0.19964800 |
| H | 4.24143000  | -2.49346300 | 1.28946000  | C                    | 3.61413500  | 3.45755600  | 0.99058000  |
| C | 3.09617500  | -4.74468800 | -1.12298900 | C                    | 2.67349400  | 5.17049500  | -0.42534400 |
| H | 3.48247000  | -5.66689500 | -0.67693800 | C                    | 3.96131300  | 4.42824400  | 1.92848400  |
| H | 3.17660500  | -4.83428000 | -2.21099900 | H                    | 3.82849700  | 2.40777300  | 1.16950800  |
| H | 2.03856500  | -4.66302500 | -0.85964000 | C                    | 3.02158400  | 6.14426700  | 0.51507100  |
| C | -1.30095100 | -0.53150300 | 2.05891000  | H                    | 2.17095500  | 5.46351300  | -1.34436000 |
| C | -2.67039400 | -0.29045200 | 2.29815700  | C                    | 3.66717700  | 5.77538600  | 1.69487000  |
| C | -0.71827000 | -1.65115300 | 2.68655700  | H                    | 4.46282100  | 4.13362600  | 2.84644400  |
| C | -3.41982700 | -1.15385000 | 3.09222100  | H                    | 2.78692500  | 7.18790500  | 0.32372700  |
| H | -3.14723300 | 0.57964100  | 1.86809000  | H                    | 3.93856100  | 6.52953500  | 2.42832600  |
| C | -1.47175300 | -2.52155800 | 3.47190800  | H                    | 0.63061700  | 0.21323700  | 1.49896300  |
| H | 0.33787300  | -1.85114100 | 2.53139100  | H                    | 0.68366700  | -0.73829800 | -1.29781300 |
| C | -2.83202400 | -2.28234400 | 3.67445500  | C                    | -1.00201200 | -2.90789900 | -0.44393000 |
| H | -4.47265800 | -0.94353400 | 3.25953900  | O                    | -0.90455600 | -1.99071500 | -1.24422200 |
| H | -0.99434000 | -3.38635600 | 3.92351400  | O                    | 0.05262800  | -3.42808900 | 0.20316100  |
| H | -3.42486100 | -2.95704900 | 4.28503500  | C                    | -2.29394200 | -3.56377800 | -0.04408600 |
| N | -1.98139000 | 1.63034500  | -0.17146900 | H                    | -2.15525200 | -4.63804800 | 0.09456200  |
| N | -2.72224600 | 0.67494500  | -0.55346700 | H                    | -2.60559700 | -3.13930700 | 0.91627100  |
| N | -3.95947900 | 0.99859400  | -0.90036300 | H                    | -3.05889500 | -3.36380800 | -0.79291200 |
| C | -4.73076100 | -0.11085700 | -1.49957400 | H                    | 0.85130600  | -2.92538700 | -0.07101600 |
| H | -5.60966200 | 0.35715600  | -1.95217700 | <b>TS12-free-cat</b> |             |             |             |
| C | -3.93682400 | -0.81254600 | -2.60874400 | N                    | 1.97677000  | 0.64957700  | -0.82026600 |
| H | -3.02248500 | -1.25852100 | -2.21082300 | O                    | 3.19095100  | -1.11179300 | -0.33806200 |
| H | -3.65549300 | -0.09869700 | -3.38938800 | C                    | 2.04761300  | 1.28689900  | 0.31875800  |
| C | -5.19588700 | -1.07937000 | -0.40504900 | C                    | 0.95046200  | 2.10713300  | -0.43371100 |
| H | -4.33085600 | -1.47489800 | 0.13155400  | C                    | -0.39126100 | 1.87159800  | -0.20277200 |
| H | -5.83861600 | -0.57018800 | 0.31967600  | O                    | 2.62168600  | 1.43466500  | 1.35981400  |
| C | -4.44285600 | 2.39413400  | -0.90854200 | C                    | -0.49861600 | -0.21503100 | 1.14120900  |
| H | -3.77711300 | 2.91659800  | -0.21789700 | C                    | -1.09197600 | 0.76048400  | 0.38272300  |
| C | -4.27108800 | 3.00876800  | -2.30352700 | C                    | 4.47024000  | -0.83308300 | -0.40908000 |
| H | -3.22538800 | 2.94468200  | -2.61608700 | O                    | 4.91936700  | 0.30013300  | -0.51367200 |
| H | -4.56746700 | 4.06291300  | -2.29778900 | C                    | 5.39907500  | -2.08104400 | -0.35839900 |
| H | -4.88897100 | 2.48800600  | -3.04362000 | C                    | 6.85721400  | -1.61854500 | -0.23951000 |

|   |             |             |             |                    |             |             |             |
|---|-------------|-------------|-------------|--------------------|-------------|-------------|-------------|
| H | 7.52983000  | -2.48421800 | -0.22603900 | H                  | -3.97818200 | -2.46301100 | -3.44423200 |
| H | 7.00926300  | -1.04344500 | 0.67816400  | H                  | -1.06217600 | 2.65539700  | -0.55626500 |
| H | 7.12772000  | -0.97120200 | -1.07685500 | C                  | 1.43637800  | 3.36936400  | -1.12489600 |
| C | 5.02091100  | -2.96172100 | 0.84832200  | H                  | 1.01258500  | 3.41920000  | -2.13405300 |
| H | 5.68948700  | -3.82861200 | 0.90634800  | H                  | 2.52219600  | 3.29931500  | -1.24368100 |
| H | 3.99463600  | -3.32965000 | 0.77123800  | C                  | 1.06533000  | 4.60935000  | -0.33189400 |
| H | 5.11222600  | -2.40188900 | 1.78532500  | C                  | 1.55005900  | 4.77722300  | 0.97437800  |
| C | 5.19978300  | -2.87272400 | -1.66831700 | C                  | 0.22370400  | 5.58518600  | -0.87528300 |
| H | 5.85645200  | -3.75056900 | -1.68189700 | C                  | 1.20349300  | 5.90664700  | 1.71344600  |
| H | 5.44526900  | -2.25437100 | -2.53847000 | H                  | 2.18802800  | 4.01261100  | 1.41065800  |
| H | 4.16846000  | -3.22017300 | -1.77456100 | C                  | -0.12325600 | 6.71835700  | -0.13431800 |
| C | -1.08966200 | -1.36092700 | 1.81610000  | H                  | -0.15739200 | 5.46220500  | -1.88636000 |
| C | -2.42560800 | -1.42748100 | 2.26800100  | C                  | 0.36673100  | 6.88159400  | 1.16120900  |
| C | -0.24452000 | -2.46593700 | 2.05751800  | H                  | 1.58633100  | 6.02683700  | 2.72290000  |
| C | -2.89561600 | -2.56560700 | 2.91254800  | H                  | -0.77478800 | 7.47018400  | -0.57081800 |
| H | -3.08146200 | -0.57774900 | 2.12428400  | H                  | 0.09854700  | 7.76121300  | 1.73934200  |
| C | -0.73083200 | -3.61612200 | 2.67465200  | H                  | 0.57523700  | -0.15677200 | 1.27241100  |
| H | 0.78833000  | -2.42801300 | 1.72233600  | H                  | 1.31816300  | -0.17071100 | -1.02446100 |
| C | -2.05849400 | -3.67100000 | 3.10475400  | C                  | 0.62091000  | -2.59099200 | -1.22615100 |
| H | -3.92244000 | -2.59553200 | 3.26585700  | O                  | 0.37463200  | -1.39725200 | -1.45926700 |
| H | -0.06965000 | -4.46359500 | 2.82829800  | O                  | 1.74574000  | -3.04307900 | -0.74012900 |
| H | -2.43760000 | -4.56290800 | 3.59481600  | C                  | -0.42028900 | -3.66158900 | -1.44493300 |
| N | -2.48968800 | 0.80597200  | 0.10761900  | H                  | 0.04285100  | -4.57191000 | -1.83104600 |
| N | -2.86676400 | -0.25602100 | -0.47967300 | H                  | -0.86913800 | -3.89836200 | -0.47415500 |
| N | -4.15466400 | -0.39178300 | -0.71902800 | H                  | -1.19848200 | -3.30463500 | -2.11800800 |
| C | -4.48215900 | -1.59320500 | -1.51834300 | H                  | 2.44381300  | -2.25226300 | -0.57665000 |
| H | -5.55448500 | -1.52500200 | -1.72233400 | <b>13-free-cat</b> |             |             |             |
| C | -3.72703600 | -1.57644300 | -2.85371300 | N                  | 0.38926600  | 1.48394300  | -1.10994100 |
| H | -2.64859100 | -1.56112200 | -2.67503100 | O                  | 3.09558600  | 1.28014000  | 0.38609800  |
| H | -3.98836800 | -0.68793100 | -3.43665700 | C                  | 1.26521800  | 2.07178100  | -1.72164100 |
| C | -4.21104200 | -2.86414100 | -0.70513500 | C                  | -0.69701000 | 1.89860000  | -0.30568500 |
| H | -3.15481700 | -2.91245000 | -0.43149000 | C                  | -1.25577000 | 1.04834000  | 0.56834500  |
| H | -4.79854300 | -2.87152000 | 0.21725400  | O                  | 2.14279400  | 2.50821100  | -2.36877000 |
| C | -5.16631800 | 0.62123900  | -0.35561100 | C                  | 0.47469000  | -0.59007100 | 1.20872600  |
| H | -4.62926700 | 1.32338700  | 0.28548700  | C                  | -0.80872000 | -0.33682800 | 0.82848700  |
| C | -5.65672300 | 1.37174000  | -1.60000300 | C                  | 4.28270600  | 1.88640500  | 0.63819100  |
| H | -4.81566400 | 1.83034600  | -2.12738200 | O                  | 4.31383300  | 2.81636300  | 1.41116200  |
| H | -6.35670400 | 2.16272100  | -1.31244600 | C                  | 5.52158800  | 1.32766500  | -0.08553900 |
| H | -6.17639900 | 0.70203000  | -2.29391000 | C                  | 6.75197800  | 2.11317300  | 0.39152500  |
| C | -6.30667900 | -0.01018000 | 0.45085000  | H                  | 7.65001300  | 1.73861900  | -0.11119000 |
| H | -5.91773400 | -0.53460100 | 1.32872000  | H                  | 6.88683700  | 2.01367500  | 1.47176800  |
| H | -6.99279900 | 0.77095400  | 0.79239600  | H                  | 6.64435600  | 3.17817900  | 0.17163000  |
| H | -6.88828700 | -0.72177800 | -0.14461300 | C                  | 5.68986500  | -0.17017700 | 0.25892700  |
| H | -4.46594500 | -3.75425400 | -1.28887000 | H                  | 6.60668400  | -0.54890100 | -0.20555200 |

|   |             |             |             |   |             |             |             |
|---|-------------|-------------|-------------|---|-------------|-------------|-------------|
| H | 4.85839500  | -0.77638600 | -0.10758400 | C | -2.48947700 | 3.65541500  | 0.10049200  |
| H | 5.77854400  | -0.31507600 | 1.34148500  | C | -2.53439500 | 4.31252100  | 1.33487700  |
| C | 5.34692200  | 1.50584500  | -1.61108900 | C | -3.69352100 | 3.25739800  | -0.49720900 |
| H | 6.25279600  | 1.16041200  | -2.12118100 | C | -3.75653800 | 4.57105000  | 1.95969200  |
| H | 5.19274500  | 2.55880200  | -1.86637700 | H | -1.60612900 | 4.61758300  | 1.81104700  |
| H | 4.50367000  | 0.93414800  | -2.00269900 | C | -4.91575000 | 3.51327700  | 0.12373000  |
| C | 1.17260200  | -1.85566800 | 1.43248500  | H | -3.66770600 | 2.73512000  | -1.45047200 |
| C | 0.59205700  | -3.13825700 | 1.31961800  | C | -4.94983600 | 4.17126300  | 1.35638100  |
| C | 2.55001200  | -1.78475200 | 1.73677200  | H | -3.77485200 | 5.08319200  | 2.91737900  |
| C | 1.35929800  | -4.28621100 | 1.50639300  | H | -5.83997500 | 3.19894100  | -0.35261200 |
| H | -0.45836800 | -3.21086600 | 1.07627100  | H | -5.90073000 | 4.37169100  | 1.84144200  |
| C | 3.31571900  | -2.93418900 | 1.91130000  | H | 1.10353600  | 0.28819400  | 1.31561000  |
| H | 3.01859800  | -0.80923100 | 1.81583800  | H | 0.52672200  | -0.46205400 | -1.53692500 |
| C | 2.72444200  | -4.19530400 | 1.79846100  | C | 2.00971200  | -1.61773200 | -1.72884000 |
| H | 0.88891200  | -5.26199100 | 1.41622000  | O | 0.70260900  | -1.38541900 | -1.82877700 |
| H | 4.37545800  | -2.84404100 | 2.13281900  | O | 2.82766900  | -0.74721200 | -1.45464400 |
| H | 3.31782200  | -5.09474000 | 1.93624900  | C | 2.37500200  | -3.05685500 | -1.95304500 |
| N | -1.73453600 | -1.37806800 | 0.66126300  | H | 3.39981900  | -3.12065200 | -2.31915200 |
| N | -2.84228600 | -0.96642600 | 0.18129300  | H | 2.31422800  | -3.56497500 | -0.98435800 |
| N | -3.76766300 | -1.89230200 | -0.02723000 | H | 1.67965000  | -3.54040800 | -2.64112500 |
| C | -4.93616700 | -1.37627200 | -0.77280100 | H | 3.13865800  | 0.56186500  | -0.27897200 |
| H | -5.61416800 | -2.22356600 | -0.89001300 |   |             |             |             |
| C | -5.65071600 | -0.29030000 | 0.04095000  |   |             |             |             |
| H | -4.99200700 | 0.56833700  | 0.19325500  |   |             |             |             |
| H | -5.95042200 | -0.67336400 | 1.02085500  |   |             |             |             |
| C | -4.53049900 | -0.87146700 | -2.16565900 |   |             |             |             |
| H | -3.82864500 | -0.03840500 | -2.06719000 |   |             |             |             |
| H | -4.04585100 | -1.66078500 | -2.74745200 |   |             |             |             |
| C | -3.45861600 | -3.32933100 | 0.14243000  |   |             |             |             |
| H | -2.84225600 | -3.36763200 | 1.04547900  |   |             |             |             |
| C | -4.71501000 | -4.16654100 | 0.38826000  |   |             |             |             |
| H | -5.34068000 | -3.72724500 | 1.17106000  |   |             |             |             |
| H | -4.41541700 | -5.16718800 | 0.71409600  |   |             |             |             |
| H | -5.32012500 | -4.28960800 | -0.51584500 |   |             |             |             |
| C | -2.62213600 | -3.85580000 | -1.03496000 |   |             |             |             |
| H | -1.73367500 | -3.23784300 | -1.18592500 |   |             |             |             |
| H | -2.29846200 | -4.88352100 | -0.83778300 |   |             |             |             |
| H | -3.21303100 | -3.85943700 | -1.95720100 |   |             |             |             |
| H | -5.41047600 | -0.52620400 | -2.71793700 |   |             |             |             |
| H | -6.54707400 | 0.04846200  | -0.48891700 |   |             |             |             |
| H | -2.15094600 | 1.38376000  | 1.07931700  |   |             |             |             |
| C | -1.17141400 | 3.32055700  | -0.55655000 |   |             |             |             |
| H | -1.25055200 | 3.45942700  | -1.64339200 |   |             |             |             |
| H | -0.38672100 | 4.01181400  | -0.21837100 |   |             |             |             |
